# Supplementary material
Source: publisher figshare collection journal article supplement (https://gsajournals.figshare.com/ndownloader/files/27742059)
Supplement: Supplementary file 1 [file 27742059]

## Sheet: BLASTp_ESALQ_MROB
Query_1638	Target_Mrob	pident	length	mismatch	gapopen	qstart	qend	sstart	send	evalue	bitscore
ESALQ_3	MROB_3930	96.55	1825	63	0	920	2744	1075	2899	0	3634
ESALQ_7	MROB_3928	98.41	440	7	0	1	440	1	440	0	895
ESALQ_8	MROB_3927	98.14	430	8	0	1	430	1	430	0	880
ESALQ_9	MROB_3926	87.72	342	14	1	1	314	1	342	0	604
ESALQ_11	MROB_3933	76.09	757	106	12	1	757	33	714	0	1071
ESALQ_12	MROB_3934	97.22	1151	22	1	1	1141	1	1151	0	2325
ESALQ_13	MROB_3931	91.12	439	31	2	1	431	1	439	0	775
ESALQ_15	MROB_3935	98.30	412	7	0	1	412	77	488	0	818
ESALQ_16	MROB_3936	97.83	323	7	0	249	571	373	695	0	655
ESALQ_17	MROB_3937	99.11	451	4	0	1	451	1	451	0	932
ESALQ_18	MROB_3939	98.29	293	5	0	1	293	1	293	0	588
ESALQ_19	MROB_3940	93.32	449	7	1	1	426	1	449	0	869
ESALQ_20	MROB_3941	97.84	510	11	0	1	510	1	510	0	1046
ESALQ_21	MROB_3942	98.52	338	5	0	31	368	1	338	0	684
ESALQ_22	MROB_3944	98.11	423	6	1	430	850	15	437	0	855
ESALQ_23	MROB_3945	97.28	257	7	0	1	257	1	257	0	511
ESALQ_26	MROB_3948	95.89	414	17	0	1	414	1	414	0	799
ESALQ_27	MROB_3949	99.51	410	2	0	1	410	1	410	0	839
ESALQ_30	MROB_3952	95.82	455	19	0	1	455	1	455	0	871
ESALQ_31	MROB_3953	98.98	391	4	0	1	391	1	391	0	787
ESALQ_32	MROB_3954	98.86	612	7	0	1	612	1	612	0	1251
ESALQ_35	MROB_3957	96.92	260	8	0	1	260	1	260	0	529
ESALQ_36	MROB_3958	98.73	394	5	0	1	394	1	394	0	796
ESALQ_38	MROB_3960	94.12	357	20	1	1	356	1	357	0	680
ESALQ_39	MROB_3961	92.34	483	7	4	1	482	1	454	0	874
ESALQ_41	MROB_3962	99.43	350	2	0	1	350	1	350	0	717
ESALQ_42	MROB_3963	100.00	255	0	0	1	255	1	255	0	515
ESALQ_43	MROB_3964	98.57	1120	16	0	1	1120	1	1120	0	2273
ESALQ_48	MROB_3969	98.93	653	7	0	1	653	1	653	0	1336
ESALQ_49	MROB_3970	98.71	544	6	1	1	544	1	543	0	1090
ESALQ_50	MROB_3971	97.06	374	10	1	1	374	1	373	0	728
ESALQ_52	MROB_3972	96.56	262	9	0	1	262	1	262	0	519
ESALQ_53	MROB_3973	99.33	596	4	0	1	596	1	596	0	1214
ESALQ_54	MROB_3974	97.55	489	12	0	1	489	1	489	0	991
ESALQ_55	MROB_3975	98.59	1276	15	1	85	1360	48	1320	0	2518
ESALQ_56	MROB_3976	98.36	487	8	0	1	487	1	487	0	992
ESALQ_57	MROB_3977	97.74	442	10	0	1	442	1	442	0	885
ESALQ_58	MROB_3977	93.03	588	34	1	1	588	513	1093	0	1114
ESALQ_59	MROB_3978	97.13	418	12	0	2	419	4	421	0	823
ESALQ_60	MROB_3979	94.87	526	24	2	1	524	1	525	0	1011
ESALQ_61	MROB_3980	81.68	393	48	5	1	379	1	383	0	618
ESALQ_64	MROB_3982	99.82	550	1	0	1	550	1	550	0	1137
ESALQ_65	MROB_3983	98.33	599	9	1	1	598	1	599	0	1221
ESALQ_66	MROB_3984	99.62	520	2	0	1	520	1	520	0	1063
ESALQ_70	MROB_3987	91.77	547	21	2	1	547	199	721	0	996
ESALQ_71	MROB_3989	97.39	614	14	2	1	614	1	612	0	1210
ESALQ_72	MROB_3991	97.84	601	13	0	1	601	1	601	0	1191
ESALQ_73	MROB_3992	100.00	452	0	0	1	452	1	452	0	939
ESALQ_77	MROB_3996	98.09	1204	18	3	1	1199	1	1204	0	2318
ESALQ_78	MROB_3997	99.32	885	6	0	1	885	1	885	0	1793
ESALQ_80	MROB_3999	98.45	258	4	0	8	265	1	258	0	534
ESALQ_81	MROB_4000	98.74	635	8	0	1	635	1	635	0	1318
ESALQ_82	MROB_4001	97.78	360	8	0	1	360	1	360	0	714
ESALQ_83	MROB_4003	95.24	651	30	1	1	650	1	651	0	1198
ESALQ_85	MROB_8586	100.00	310	0	0	1	310	1	310	0	622
ESALQ_89	MROB_4008	100.00	390	0	0	1	390	1	390	0	790
ESALQ_90	MROB_4009	98.32	1785	17	1	1	1785	1	1772	0	3590
ESALQ_91	MROB_4009	99.45	543	3	0	1	543	1874	2416	0	1070
ESALQ_92	MROB_4010	100.00	678	0	0	1	678	1	678	0	1395
ESALQ_93	MROB_4011	99.73	368	1	0	40	407	11	378	0	758
ESALQ_95	MROB_4013	99.06	425	4	0	1	425	1	425	0	874
ESALQ_96	MROB_4014	99.66	589	2	0	1	589	1	589	0	1201
ESALQ_99	MROB_4018	96.66	688	11	1	1	688	1	676	0	1328
ESALQ_100	MROB_4019	100.00	416	0	0	1	416	1	416	0	864
ESALQ_101	MROB_4020	96.47	624	22	0	1	624	1	624	0	1252
ESALQ_103	MROB_4022	99.17	845	7	0	1	845	1	845	0	1726
ESALQ_104	MROB_4023	97.43	311	8	0	25	335	1	311	0	625
ESALQ_105	MROB_4024	99.54	651	3	0	1	651	1	651	0	1327
ESALQ_106	MROB_4025	96.97	858	5	1	1	837	1	858	0	1702
ESALQ_107	MROB_4026	100.00	313	0	0	1	313	1	313	0	638
ESALQ_108	MROB_4028	98.33	898	15	0	1	898	1	898	0	1811
ESALQ_109	MROB_4029	99.14	582	5	0	189	770	1	582	0	1201
ESALQ_110	MROB_4030	99.35	612	4	0	1	612	1	612	0	1228
ESALQ_111	MROB_4031	99.79	476	1	0	1	476	1	476	0	979
ESALQ_112	MROB_4032	98.68	605	8	0	1	605	1	605	0	1174
ESALQ_114	MROB_4034	99.82	1113	2	0	1	1113	1	1113	0	2299
ESALQ_115	MROB_4035	99.06	530	5	0	1	530	1	530	0	1088
ESALQ_117	MROB_4036	100.00	723	0	0	1	723	1	723	0	1510
ESALQ_118	MROB_4037	99.43	523	3	0	1	523	1	523	0	1075
ESALQ_120	MROB_4039	98.90	729	8	0	1	729	1	729	0	1497
ESALQ_121	MROB_4040	100.00	437	0	0	1	437	1	437	0	872
ESALQ_122	MROB_4041	96.88	480	3	1	1	468	1	480	0	951
ESALQ_123	MROB_4042	98.68	607	8	0	1	607	1	607	0	1248
ESALQ_126	MROB_4046	94.99	399	3	1	1	399	1	382	0	775
ESALQ_127	MROB_4047	99.62	1307	5	0	1	1307	1	1307	0	2667
ESALQ_128	MROB_4048	98.69	383	5	0	1	383	1	383	0	775
ESALQ_129	MROB_4049	94.18	292	12	1	1	292	5	291	0	561
ESALQ_131	MROB_4051	94.44	324	18	0	1	324	1	324	0	621
ESALQ_132	MROB_4052	99.50	808	4	0	128	935	1	808	0	1640
ESALQ_133	MROB_4053	99.40	1004	6	0	1	1004	1	1004	0	2041
ESALQ_134	MROB_4054	98.92	462	3	1	1	460	1	462	0	862
ESALQ_136	MROB_4055	99.87	742	1	0	1	742	1	742	0	1516
ESALQ_137	MROB_4056	96.90	645	16	3	1	643	138	780	0	1127
ESALQ_138	MROB_4057	88.68	371	8	1	1	337	1	371	0	656
ESALQ_139	MROB_4058	100.00	371	0	0	1	371	1	371	0	773
ESALQ_140	MROB_4059	98.72	545	7	0	1	545	1	545	0	1101
ESALQ_141	MROB_4060	98.33	478	6	1	50	527	171	646	0	976
ESALQ_143	MROB_4062	99.45	1085	6	0	1	1085	1	1085	0	2218
ESALQ_146	MROB_4065	99.08	544	3	1	1	544	1	542	0	1073
ESALQ_147	MROB_4066	99.50	404	2	0	1	404	1	404	0	795
ESALQ_148	MROB_4067	98.39	1306	19	1	220	1523	145	1450	0	2669
ESALQ_151	MROB_4070	92.41	1278	86	5	1	1275	1	1270	0	2350
ESALQ_152	MROB_4071	99.63	272	1	0	1	272	1	272	0	557
ESALQ_154	MROB_4073	99.57	931	4	0	1	931	50	980	0	1925
ESALQ_155	MROB_4074	98.56	485	7	0	1	485	1	485	0	986
ESALQ_156	MROB_4075	97.97	345	7	0	1	345	1	345	0	697
ESALQ_157	MROB_4076	99.28	419	3	0	1	419	1	419	0	849
ESALQ_159	MROB_4078	96.68	301	4	1	9	303	512	812	0	598
ESALQ_160	MROB_4078	92.59	513	10	2	1	487	1	511	0	941
ESALQ_161	MROB_4079	97.92	337	3	1	1	337	1	333	0	663
ESALQ_162	MROB_965	98.85	523	6	0	1	523	1	523	0	1062
ESALQ_165	MROB_968	99.79	959	2	0	1	959	1	959	0	1882
ESALQ_166	MROB_969	100.00	1067	0	0	1	1067	1	1067	0	2212
ESALQ_168	MROB_971	92.42	462	3	1	1	462	1	430	0	804
ESALQ_169	MROB_972	99.15	589	5	0	1	589	143	731	0	1196
ESALQ_170	MROB_973	98.79	1154	13	1	1	1153	1	1154	0	2320
ESALQ_171	MROB_974	99.81	1074	2	0	1	1074	1	1074	0	2167
ESALQ_175	MROB_978	98.25	513	9	0	1	513	1	513	0	1033
ESALQ_176	MROB_979	95.30	298	8	1	1	298	1	292	0	520
ESALQ_177	MROB_980	97.83	322	1	1	1	316	1	322	0	653
ESALQ_179	MROB_981	99.42	684	4	0	1	684	1	684	0	1407
ESALQ_180	MROB_982	98.21	672	11	1	1	671	1	672	0	1337
ESALQ_181	MROB_983	99.31	578	4	0	1	578	1	578	0	1173
ESALQ_183	MROB_985	98.23	452	8	0	1	452	1	452	0	897
ESALQ_185	MROB_986	96.53	317	7	1	1	313	1	317	0	627
ESALQ_187	MROB_989	98.79	994	8	1	1	990	1	994	0	2023
ESALQ_189	MROB_991	90.88	713	10	2	1	713	1	658	0	1297
ESALQ_190	MROB_993	98.99	1188	7	1	1	1183	1	1188	0	2389
ESALQ_192	MROB_995	97.02	369	11	0	1	369	1	369	0	659
ESALQ_195	MROB_997	99.60	992	4	0	1	992	1	992	0	1999
ESALQ_196	MROB_999	99.69	635	2	0	1	635	1	635	0	1303
ESALQ_198	MROB_1001	98.58	703	10	0	1	703	1	703	0	1436
ESALQ_199	MROB_1002	98.18	661	12	0	1	661	1	661	0	1334
ESALQ_200	MROB_1003	99.56	906	4	0	1	906	1	906	0	1840
ESALQ_201	MROB_1004	97.80	1182	26	0	1	1182	1	1182	0	2394
ESALQ_203	MROB_1006	100.00	334	0	0	1	334	1	334	0	686
ESALQ_204	MROB_1007	99.08	867	8	0	1	867	1	867	0	1795
ESALQ_205	MROB_1008	98.47	852	10	1	1	852	1	849	0	1666
ESALQ_207	MROB_1010	89.15	516	13	2	7	522	68	540	0	916
ESALQ_208	MROB_1011	98.76	1127	14	0	1	1127	1	1127	0	2321
ESALQ_209	MROB_1012	99.39	329	2	0	1	329	1	329	0	669
ESALQ_211	MROB_1014	98.90	545	5	1	1	544	1	545	0	1099
ESALQ_212	MROB_1015	98.98	394	4	0	1	394	1	394	0	794
ESALQ_214	MROB_1017	100.00	456	0	0	1	456	1	456	0	930
ESALQ_215	MROB_1018	99.18	612	5	0	1	612	1	612	0	1246
ESALQ_216	MROB_1019	99.36	311	2	0	1	311	1	311	0	640
ESALQ_217	MROB_1020	98.84	259	3	0	58	316	1	259	0	529
ESALQ_218	MROB_1021	99.66	597	2	0	1	597	1	597	0	1197
ESALQ_219	MROB_1022	99.09	769	7	0	1	769	1	769	0	1546
ESALQ_221	MROB_1025	99.80	503	1	0	1	503	1	503	0	1050
ESALQ_224	MROB_1028	93.13	801	33	2	1	779	1	801	0	1470
ESALQ_228	MROB_1031	97.71	480	9	1	1	480	1	478	0	947
ESALQ_229	MROB_1033	91.92	1003	52	2	1	978	1	999	0	1823
ESALQ_230	MROB_1034	93.75	304	9	1	1	294	1	304	0	579
ESALQ_231	MROB_1035	99.51	409	2	0	1	409	1	409	0	833
ESALQ_233	MROB_1037	98.09	996	19	0	1	996	1	996	0	1982
ESALQ_235	MROB_1039	99.79	486	1	0	1	486	1	486	0	930
ESALQ_236	MROB_1040	99.81	529	1	0	1	529	1	529	0	1058
ESALQ_237	MROB_1041	96.50	457	14	1	1	457	1	455	0	855
ESALQ_238	MROB_1042	95.36	280	13	0	1	280	1	280	0	541
ESALQ_239	MROB_1043	99.81	529	1	0	1	529	1	529	0	1078
ESALQ_240	MROB_1044	95.72	304	4	1	1	304	1	295	0	601
ESALQ_241	MROB_1045	99.11	448	4	0	1	448	148	595	0	931
ESALQ_242	MROB_1046	98.99	398	4	0	1	398	1	398	0	808
ESALQ_243	MROB_1047	99.27	411	3	0	1	411	1	411	0	837
ESALQ_245	MROB_1048	98.67	376	5	0	1	376	1	376	0	761
ESALQ_246	MROB_1049	97.16	668	19	0	1	668	1	668	0	1359
ESALQ_247	MROB_1050	99.16	357	3	0	1	357	1	357	0	738
ESALQ_248	MROB_1052	99.49	588	3	0	1	588	1	588	0	1199
ESALQ_249	MROB_1053	100.00	342	0	0	1	342	1	342	0	714
ESALQ_251	MROB_1055	96.18	1596	16	1	1	1551	1	1596	0	3154
ESALQ_253	MROB_1057	99.28	559	3	1	1	559	1	558	0	1129
ESALQ_254	MROB_1058	99.75	401	1	0	1	401	1	401	0	825
ESALQ_255	MROB_1059	97.18	1065	21	2	1	1058	1	1063	0	2125
ESALQ_256	MROB_1060	95.64	505	22	0	1	505	1	505	0	993
ESALQ_257	MROB_1062	98.68	757	10	0	1	757	1	757	0	1566
ESALQ_258	MROB_1063	87.21	438	11	3	1	438	182	574	0	763
ESALQ_259	MROB_1064	99.64	826	3	0	1	826	1	826	0	1675
ESALQ_260	MROB_1065	99.21	381	1	1	1	381	1	379	0	704
ESALQ_261	MROB_1066	99.82	561	1	0	1	561	1	561	0	1152
ESALQ_263	MROB_1067	100.00	2432	0	0	1	2432	1	2432	0	5024
ESALQ_264	MROB_1068	98.14	269	5	0	1	269	1	269	0	540
ESALQ_265	MROB_1069	99.86	705	1	0	1	705	1	705	0	1466
ESALQ_266	MROB_1071	84.69	320	38	1	1	320	1	309	0	539
ESALQ_267	MROB_1072	99.12	452	4	0	1	452	1	452	0	920
ESALQ_269	MROB_1074	100.00	468	0	0	1	468	1	468	0	972
ESALQ_270	MROB_1075	99.56	899	4	0	1	899	1	899	0	1852
ESALQ_271	MROB_1076	99.63	544	2	0	1	544	1	544	0	1052
ESALQ_272	MROB_1077	95.33	836	17	1	1	814	1	836	0	1609
ESALQ_273	MROB_1078	93.65	551	12	1	1	528	1	551	0	1019
ESALQ_274	MROB_1079	100.00	421	0	0	1	421	1	421	0	868
ESALQ_275	MROB_1080	100.00	265	0	0	1	265	1	265	0	551
ESALQ_276	MROB_1081	98.86	527	6	0	1	527	1	527	0	1045
ESALQ_277	MROB_1082	99.40	1509	9	0	1	1509	1	1509	0	3131
ESALQ_278	MROB_1083	86.93	436	51	3	1	435	1	431	0	741
ESALQ_279	MROB_1084	99.02	1019	10	0	1	1019	1	1019	0	2026
ESALQ_281	MROB_1086	98.36	733	12	0	8	740	2	734	0	1494
ESALQ_282	MROB_1087	99.29	421	3	0	1	421	1	421	0	791
ESALQ_283	MROB_1088	98.79	577	6	1	1	576	1	577	0	1159
ESALQ_285	MROB_1090	98.25	1142	20	0	1	1142	1	1142	0	2253
ESALQ_286	MROB_1091	97.43	662	16	1	179	839	66	727	0	974
ESALQ_289	MROB_1094	99.30	431	3	0	4	434	59	489	0	880
ESALQ_291	MROB_1096	97.04	540	8	2	1	532	1	540	0	1033
ESALQ_292	MROB_1097	98.27	405	7	0	1	405	1	405	0	812
ESALQ_293	MROB_1098	98.85	1830	2	1	2	1831	20	1830	0	3738
ESALQ_294	MROB_1099	88.29	427	27	1	1	427	1	404	0	722
ESALQ_295	MROB_1100	99.50	400	2	0	1	400	1	400	0	825
ESALQ_297	MROB_1102	99.76	415	1	0	1	415	1	415	0	851
ESALQ_299	MROB_1104	93.80	274	17	0	15	288	247	520	0	521
ESALQ_300	MROB_1105	99.33	299	2	0	1	299	1	299	0	620
ESALQ_301	MROB_1106	99.07	428	4	0	1	428	1	428	0	809
ESALQ_302	MROB_1107	99.54	435	2	0	1	435	1	435	0	842
ESALQ_304	MROB_1109	99.72	353	1	0	1	353	1	353	0	716
ESALQ_305	MROB_1110	96.18	288	11	0	1	288	124	411	0	546
ESALQ_307	MROB_1111	97.91	669	14	0	1	669	1	669	0	1356
ESALQ_309	MROB_1113	97.19	675	17	1	1	673	1	675	0	1332
ESALQ_310	MROB_1114	98.99	296	3	0	1	296	1	296	0	599
ESALQ_311	MROB_1115	99.29	283	2	0	1	283	1	283	0	565
ESALQ_312	MROB_1116	98.19	277	5	0	131	407	11	287	0	558
ESALQ_313	MROB_1117	99.46	372	2	0	1	372	1	372	0	766
ESALQ_314	MROB_1120	99.40	666	4	0	99	764	129	794	0	1352
ESALQ_317	MROB_1124	98.76	644	8	0	1	644	1	644	0	1272
ESALQ_319	MROB_1126	98.03	457	9	0	1	457	1	457	0	931
ESALQ_322	MROB_1128	93.96	298	18	0	3	300	211	508	0	568
ESALQ_323	MROB_1129	99.46	556	3	0	1	556	1	556	0	1121
ESALQ_324	MROB_1130	98.61	361	5	0	1	361	1	361	0	736
ESALQ_325	MROB_1131	100.00	515	0	0	1	515	1	515	0	1053
ESALQ_326	MROB_1132	89.30	486	3	1	1	486	1	437	0	884
ESALQ_327	MROB_1133	99.02	612	6	0	35	646	117	728	0	1249
ESALQ_328	MROB_1135	96.21	1109	25	1	534	1642	14	1105	0	2196
ESALQ_329	MROB_1136	94.77	497	19	2	1	491	1	496	0	949
ESALQ_331	MROB_1138	98.32	476	3	1	1	476	1	471	0	951
ESALQ_332	MROB_1139	99.42	686	4	0	1	686	1	686	0	1370
ESALQ_335	MROB_1142	99.37	316	2	0	1	316	1	316	0	627
ESALQ_337	MROB_1144	88.93	515	4	1	1	515	1	462	0	916
ESALQ_338	MROB_1145	97.07	375	11	0	1	375	1	375	0	754
ESALQ_339	MROB_1146	95.60	613	26	1	1	612	1	613	0	1216
ESALQ_343	MROB_1150	99.50	402	2	0	1	402	1	402	0	775
ESALQ_344	MROB_1152	98.31	296	5	0	1	296	1	296	0	561
ESALQ_345	MROB_1153	98.93	468	5	0	1	468	1	468	0	964
ESALQ_346	MROB_1154	89.04	511	7	1	1	511	46	507	0	830
ESALQ_347	MROB_1155	97.59	290	7	0	1	290	131	420	0	595
ESALQ_348	MROB_1156	99.59	488	2	0	1	488	1	488	0	1008
ESALQ_349	MROB_1157	95.06	769	38	0	1	769	1	769	0	1489
ESALQ_350	MROB_1158	95.67	439	13	2	1	433	1	439	0	769
ESALQ_352	MROB_1160	99.64	275	1	0	1	275	1	275	0	561
ESALQ_353	MROB_1161	95.43	897	24	4	1	880	1	897	0	1658
ESALQ_354	MROB_1162	97.83	737	15	1	1	736	1	737	0	1481
ESALQ_355	MROB_1163	100.00	327	0	0	1	327	1	327	0	677
ESALQ_356	MROB_1164	92.04	553	44	0	1	553	1	553	0	834
ESALQ_357	MROB_1165	96.79	530	17	0	1	530	1	530	0	1068
ESALQ_358	MROB_1166	97.98	445	8	1	1	445	1	444	0	872
ESALQ_360	MROB_1168	98.80	333	4	0	1	333	1	333	0	665
ESALQ_361	MROB_1169	98.65	814	11	0	1	814	1	814	0	1624
ESALQ_362	MROB_1170	99.56	1607	7	0	1	1607	1	1607	0	3284
ESALQ_363	MROB_1171	99.39	1468	9	0	1	1468	1	1468	0	3007
ESALQ_364	MROB_1172	100.00	352	0	0	1	352	1	352	0	728
ESALQ_365	MROB_1173	99.18	736	3	1	40	775	1	733	0	1491
ESALQ_367	MROB_1175	94.44	1025	11	2	1	979	1	1025	0	1987
ESALQ_368	MROB_1176	100.00	343	0	0	1	343	1	343	0	661
ESALQ_369	MROB_1177	97.95	342	7	0	1	342	1	342	0	696
ESALQ_370	MROB_1178	95.42	720	31	1	1	718	1	720	0	1279
ESALQ_371	MROB_1179	98.16	706	9	1	1	702	1	706	0	1423
ESALQ_372	MROB_1180	97.89	663	1	1	1	663	1	650	0	1347
ESALQ_373	MROB_1181	99.81	525	1	0	1	525	1	525	0	1078
ESALQ_374	MROB_1182	88.61	527	20	2	1	527	1	487	0	934
ESALQ_375	MROB_1183	99.72	358	1	0	1	358	1	358	0	728
ESALQ_376	MROB_1184	100.00	262	0	0	1	262	1	262	0	528
ESALQ_377	MROB_1185	99.29	282	2	0	1	282	112	393	0	583
ESALQ_378	MROB_1186	98.91	1096	7	1	1	1096	7	1097	0	2149
ESALQ_379	MROB_1187	99.30	2144	14	1	1	2143	1	2144	0	4313
ESALQ_381	MROB_1189	99.82	552	1	0	1	552	1	552	0	1104
ESALQ_382	MROB_1190	99.67	302	1	0	1	302	1	302	0	619
ESALQ_383	MROB_1191	98.49	1592	24	0	1	1592	1	1592	0	3246
ESALQ_384	MROB_1192	99.15	944	5	1	1	941	1	944	0	1872
ESALQ_385	MROB_1193	99.05	629	6	0	1	629	171	799	0	1263
ESALQ_386	MROB_1194	97.77	1164	25	1	33	1195	69	1232	0	2352
ESALQ_388	MROB_1196	99.48	381	2	0	1	381	1	381	0	782
ESALQ_389	MROB_1197	94.64	485	9	2	1	471	1	482	0	923
ESALQ_390	MROB_1198	99.88	860	1	0	1	860	1	860	0	1770
ESALQ_391	MROB_1199	99.81	2141	4	0	1	2141	1	2141	0	4399
ESALQ_392	MROB_1200	98.72	312	4	0	1	312	1	312	0	632
ESALQ_393	MROB_1201	99.26	403	3	0	1	403	1	403	0	810
ESALQ_394	MROB_1202	94.91	393	17	1	1	390	1	393	0	675
ESALQ_395	MROB_1203	99.21	509	4	0	1	509	1	509	0	1022
ESALQ_396	MROB_1204	95.91	318	0	1	1	318	1	305	0	620
ESALQ_398	MROB_1206	99.73	375	1	0	1	375	1	375	0	772
ESALQ_399	MROB_1207	99.20	1127	9	0	1	1127	1	1127	0	2244
ESALQ_400	MROB_1208	98.69	1070	14	0	1	1070	1	1070	0	2159
ESALQ_401	MROB_1209	91.38	545	14	2	52	563	46	590	0	986
ESALQ_403	MROB_1210	99.66	290	1	0	1	290	1	290	0	591
ESALQ_404	MROB_1211	91.96	510	12	3	1	508	1	483	0	929
ESALQ_405	MROB_1212	98.08	364	7	0	1	364	1	364	0	747
ESALQ_406	MROB_1213	100.00	307	0	0	1	307	1	307	0	639
ESALQ_407	MROB_1214	99.19	493	3	1	478	970	514	1005	0	973
ESALQ_409	MROB_1216	99.33	300	2	0	1	300	1	300	0	616
ESALQ_410	MROB_1217	99.10	669	6	0	1	669	2	670	0	1373
ESALQ_411	MROB_1218	98.75	400	5	0	1	400	38	437	0	810
ESALQ_413	MROB_1220	97.04	372	11	0	1	372	1	372	0	749
ESALQ_415	MROB_1222	98.21	503	4	1	1	503	1	498	0	1023
ESALQ_416	MROB_1223	99.63	539	2	0	1	539	1	539	0	1104
ESALQ_417	MROB_1224	97.20	571	16	0	1	571	1	571	0	1144
ESALQ_418	MROB_1225	97.75	756	11	1	1	750	1	756	0	1523
ESALQ_419	MROB_1226	95.68	486	20	1	1	485	1	486	0	822
ESALQ_420	MROB_1227	99.59	488	2	0	1	488	1	488	0	999
ESALQ_421	MROB_1228	99.79	479	1	0	1	479	1	479	0	989
ESALQ_422	MROB_1229	98.82	510	6	0	1	510	1	510	0	1051
ESALQ_423	MROB_1230	98.55	1035	15	0	1	1035	1	1035	0	2104
ESALQ_425	MROB_1232	99.53	643	3	0	1	643	1	643	0	1335
ESALQ_426	MROB_1233	99.47	1507	8	0	1	1507	1	1507	0	3088
ESALQ_427	MROB_1234	95.34	622	29	0	1	622	1	622	0	1222
ESALQ_428	MROB_1235	100.00	330	0	0	1	330	1	330	0	670
ESALQ_429	MROB_1236	99.40	827	5	0	1	827	1	827	0	1693
ESALQ_430	MROB_1237	98.97	292	3	0	1	292	1	292	0	593
ESALQ_431	MROB_1238	99.63	272	1	0	1	272	1	272	0	558
ESALQ_432	MROB_1239	98.07	362	7	0	1	362	1	362	0	714
ESALQ_433	MROB_1240	99.11	449	4	0	1	449	1	449	0	912
ESALQ_434	MROB_1241	99.01	808	6	2	1	806	1	808	0	1587
ESALQ_435	MROB_1242	98.73	472	6	0	1	472	1	472	0	952
ESALQ_436	MROB_1243	100.00	253	0	0	1	253	1	253	0	520
ESALQ_437	MROB_1244	99.50	597	3	0	1	597	1	597	0	1237
ESALQ_438	MROB_1245	99.22	516	4	0	1	516	1	516	0	1074
ESALQ_439	MROB_1246	99.48	1151	6	0	1	1151	1	1151	0	2343
ESALQ_440	MROB_1247	99.73	743	2	0	1	743	1	743	0	1523
ESALQ_441	MROB_1248	99.40	672	4	0	1	672	1	672	0	1355
ESALQ_442	MROB_1249	96.96	724	4	1	1	724	1	706	0	1415
ESALQ_444	MROB_1251	98.28	873	12	1	1	873	1	870	0	1776
ESALQ_446	MROB_1253	99.09	992	9	0	1	992	1	992	0	2041
ESALQ_447	MROB_1254	99.42	520	3	0	1	520	1	520	0	1046
ESALQ_449	MROB_1256	99.91	1135	1	0	1	1135	1	1135	0	2251
ESALQ_450	MROB_1257	97.06	1089	30	1	11	1099	22	1108	0	2187
ESALQ_452	MROB_1259	97.66	853	19	1	1	852	1	853	0	1721
ESALQ_453	MROB_1260	99.06	533	5	0	1	533	1	533	0	1086
ESALQ_455	MROB_1261	100.00	289	0	0	1	289	71	359	0	598
ESALQ_456	MROB_1262	99.24	262	2	0	1	262	1	262	0	538
ESALQ_457	MROB_1263	99.79	482	1	0	1	482	1	482	0	995
ESALQ_458	MROB_1264	99.32	441	3	0	1	441	1	441	0	903
ESALQ_459	MROB_1265	98.66	897	10	1	176	1072	2	896	0	1816
ESALQ_460	MROB_1266	99.34	453	3	0	1	453	1	453	0	938
ESALQ_462	MROB_1268	99.60	496	2	0	1	496	11	506	0	995
ESALQ_463	MROB_1269	99.26	406	3	0	1	406	1	406	0	796
ESALQ_464	MROB_1270	100.00	424	0	0	1	424	1	424	0	867
ESALQ_465	MROB_1271	100.00	260	0	0	1	260	1	260	0	533
ESALQ_466	MROB_1272	99.62	264	1	0	1	264	1	264	0	544
ESALQ_468	MROB_1274	99.26	672	5	0	1	672	1	672	0	1376
ESALQ_469	MROB_1275	98.94	567	6	0	125	691	1	567	0	1179
ESALQ_470	MROB_1276	99.60	495	1	1	1	494	1	495	0	997
ESALQ_471	MROB_1277	99.56	676	3	0	1	676	1	676	0	1410
ESALQ_474	MROB_1280	99.41	1018	6	0	1	1018	1	1018	0	2109
ESALQ_475	MROB_1281	98.57	419	6	0	1	419	1	419	0	866
ESALQ_476	MROB_1282	97.93	338	5	1	1	336	1	338	0	646
ESALQ_477	MROB_1283	96.37	578	20	1	1	577	1	578	0	1115
ESALQ_478	MROB_1284	98.60	1213	17	0	1	1213	1	1213	0	2469
ESALQ_480	MROB_1286	98.04	767	15	0	8	774	62	828	0	1551
ESALQ_482	MROB_1288	98.25	401	7	0	1	401	1	401	0	769
ESALQ_484	MROB_1290	100.00	568	0	0	1	568	1	568	0	1160
ESALQ_485	MROB_1291	100.00	496	0	0	1	496	1	496	0	1026
ESALQ_487	MROB_1292	99.34	305	2	0	1	305	1	305	0	613
ESALQ_488	MROB_1293	99.09	330	3	0	1	330	1	330	0	666
ESALQ_489	MROB_1294	99.64	275	1	0	1	275	1	275	0	552
ESALQ_491	MROB_1296	98.19	774	14	0	1	774	1	774	0	1565
ESALQ_493	MROB_1298	99.08	981	9	0	1	981	1	981	0	2032
ESALQ_495	MROB_1300	97.31	297	8	0	1	297	1	297	0	582
ESALQ_496	MROB_1301	98.56	277	4	0	1	277	1	277	0	568
ESALQ_497	MROB_1302	99.27	685	5	0	1	685	1	685	0	1423
ESALQ_498	MROB_1303	99.56	452	2	0	1	452	1	452	0	905
ESALQ_499	MROB_1304	99.11	785	7	0	1	785	1	785	0	1159
ESALQ_500	MROB_1305	99.58	473	2	0	1	473	1	473	0	963
ESALQ_501	MROB_1306	98.63	655	9	0	1	655	1	655	0	1340
ESALQ_502	MROB_1307	97.40	385	10	0	1	385	1	385	0	770
ESALQ_505	MROB_1310	88.75	320	18	3	1	303	1	319	0	566
ESALQ_506	MROB_1311	99.21	378	3	0	1	378	1	378	0	775
ESALQ_507	MROB_1312	99.40	827	5	0	1	827	1	827	0	1689
ESALQ_508	MROB_1313	96.76	710	21	1	1	708	1	710	0	1429
ESALQ_509	MROB_1314	100.00	305	0	0	1	305	1	305	0	600
ESALQ_510	MROB_1315	98.15	972	11	1	1	965	1	972	0	1933
ESALQ_513	MROB_1318	99.18	364	3	0	1	364	1	364	0	741
ESALQ_514	MROB_1319	99.05	527	5	0	1	527	1	527	0	1079
ESALQ_515	MROB_1320	98.72	312	4	0	1	312	1	312	0	630
ESALQ_516	MROB_1321	99.60	250	1	0	1	250	1	250	0	514
ESALQ_517	MROB_1322	98.92	740	6	1	1	740	1	738	0	1436
ESALQ_518	MROB_1323	99.41	1010	5	1	1	1009	1	1010	0	2061
ESALQ_519	MROB_1324	99.28	693	5	0	1	693	1	693	0	1425
ESALQ_520	MROB_1325	98.74	554	7	0	1	554	161	714	0	1104
ESALQ_521	MROB_1326	97.00	400	12	0	292	691	162	561	0	786
ESALQ_523	MROB_1328	99.13	691	6	0	1	691	1	691	0	1388
ESALQ_524	MROB_1329	97.63	379	9	0	1	379	1	379	0	768
ESALQ_525	MROB_1330	97.97	295	6	0	1	295	1	295	0	589
ESALQ_527	MROB_1332	99.82	551	1	0	1	551	1	551	0	1120
ESALQ_528	MROB_1333	99.16	837	6	1	1	836	1	837	0	1696
ESALQ_529	MROB_1334	99.25	668	5	0	1	668	1	668	0	1355
ESALQ_531	MROB_1336	98.25	399	7	0	1	399	1	399	0	811
ESALQ_532	MROB_1337	96.93	522	4	1	1	522	74	583	0	1046
ESALQ_533	MROB_1339	92.34	640	12	2	1	603	1	640	0	1188
ESALQ_534	MROB_1340	99.24	263	2	0	1	263	1	263	0	535
ESALQ_535	MROB_1341	97.08	343	8	1	1	341	1	343	0	661
ESALQ_536	MROB_1342	99.29	565	4	0	1	565	1	565	0	1175
ESALQ_537	MROB_1343	97.36	605	16	0	1	605	1	605	0	1163
ESALQ_538	MROB_1344	97.03	606	12	1	1	606	1	600	0	1201
ESALQ_540	MROB_1346	99.37	637	4	0	1	637	1	637	0	1274
ESALQ_541	MROB_1347	99.32	293	2	0	1	293	1	293	0	611
ESALQ_542	MROB_1348	99.30	572	4	0	1	572	1	572	0	1145
ESALQ_543	MROB_1349	99.65	579	2	0	1	579	1	579	0	1170
ESALQ_544	MROB_1350	98.62	362	5	0	7	368	1	362	0	744
ESALQ_545	MROB_1351	100.00	306	0	0	1	306	1	306	0	640
ESALQ_546	MROB_1352	99.18	730	4	1	1	730	1	728	0	1459
ESALQ_547	MROB_1353	99.62	262	1	0	1	262	1	262	0	530
ESALQ_548	MROB_1354	100.00	255	0	0	1	255	1	255	0	524
ESALQ_550	MROB_1356	98.78	492	6	0	1	492	1	492	0	978
ESALQ_551	MROB_1357	98.32	477	8	0	1	477	1	477	0	964
ESALQ_552	MROB_1358	99.69	1277	4	0	1	1277	1	1277	0	2587
ESALQ_553	MROB_1359	99.53	845	4	0	1	845	1	845	0	1730
ESALQ_554	MROB_1360	100.00	363	0	0	1	363	1	363	0	745
ESALQ_555	MROB_1362	99.47	939	5	0	1	939	1	939	0	1941
ESALQ_557	MROB_1364	98.55	622	9	0	1	622	1	622	0	1269
ESALQ_558	MROB_1365	96.99	299	9	0	1	299	1	299	0	589
ESALQ_559	MROB_1366	100.00	593	0	0	1	593	1	593	0	1208
ESALQ_560	MROB_1367	95.33	664	7	1	1	664	1	640	0	1304
ESALQ_561	MROB_1368	99.75	396	1	0	1	396	1	396	0	800
ESALQ_563	MROB_1370	99.30	570	4	0	1	570	1	570	0	1102
ESALQ_565	MROB_1372	99.76	425	1	0	1	425	1	425	0	860
ESALQ_566	MROB_1373	99.78	464	1	0	1	464	1	464	0	946
ESALQ_568	MROB_1375	97.92	913	14	1	1	908	1	913	0	1790
ESALQ_569	MROB_1376	99.24	393	3	0	1	393	1	393	0	800
ESALQ_570	MROB_1377	98.63	1533	21	0	1	1533	1	1533	0	3148
ESALQ_571	MROB_1378	98.74	872	11	0	1	872	1	872	0	1772
ESALQ_573	MROB_1380	99.51	411	2	0	1	411	1	411	0	847
ESALQ_574	MROB_1381	98.95	953	9	1	1	952	1	953	0	1892
ESALQ_575	MROB_1382	99.39	493	3	0	1	493	1	493	0	1014
ESALQ_576	MROB_1383	98.81	1345	16	0	1	1345	1	1345	0	2728
ESALQ_577	MROB_1384	97.88	756	13	1	1	753	1	756	0	1540
ESALQ_578	MROB_1385	93.27	446	9	1	1	446	1	425	0	815
ESALQ_580	MROB_1387	98.42	442	7	0	1	442	1	442	0	887
ESALQ_581	MROB_1388	98.98	781	6	2	1	779	1	781	0	1543
ESALQ_582	MROB_1389	99.26	537	4	0	1	537	1	537	0	1107
ESALQ_584	MROB_1391	99.72	711	2	0	1	711	1	711	0	1458
ESALQ_585	MROB_1392	98.69	609	8	0	1	609	1	609	0	1234
ESALQ_587	MROB_1394	100.00	260	0	0	1	260	1	260	0	538
ESALQ_588	MROB_1395	97.88	2121	45	0	1	2121	1	2121	0	4197
ESALQ_589	MROB_1396	99.49	1175	6	0	1	1175	1	1175	0	2341
ESALQ_590	MROB_1397	100.00	750	0	0	1	750	1	750	0	1543
ESALQ_591	MROB_1398	89.04	757	22	3	1	757	1	696	0	1370
ESALQ_593	MROB_1400	99.38	1132	7	0	83	1214	5	1136	0	2270
ESALQ_594	MROB_1401	99.37	319	2	0	1	319	1	319	0	647
ESALQ_595	MROB_1402	98.83	341	4	0	1	341	1	341	0	704
ESALQ_596	MROB_1403	97.67	731	17	0	1	731	1	731	0	1478
ESALQ_597	MROB_1404	98.94	849	9	0	15	863	482	1330	0	1741
ESALQ_598	MROB_1404	88.92	334	4	1	3	336	145	445	0	577
ESALQ_599	MROB_1405	99.30	427	3	0	1	427	1	427	0	859
ESALQ_600	MROB_1406	100.00	495	0	0	1	495	1	495	0	1030
ESALQ_601	MROB_1407	99.69	654	2	0	1	654	1	654	0	1356
ESALQ_603	MROB_1409	99.67	299	1	0	1	299	63	361	0	611
ESALQ_605	MROB_1411	97.80	273	6	0	1	273	1	273	0	549
ESALQ_606	MROB_1412	97.94	825	17	0	1	825	1	825	0	1683
ESALQ_607	MROB_1413	98.81	337	4	0	1	337	1	337	0	687
ESALQ_608	MROB_1414	90.84	404	35	1	1	404	1	402	0	647
ESALQ_609	MROB_1415	99.30	429	3	0	1	429	71	499	0	865
ESALQ_610	MROB_1416	97.60	416	10	0	1	416	1	416	0	850
ESALQ_612	MROB_1418	99.75	396	1	0	1	396	1	396	0	799
ESALQ_614	MROB_1420	98.90	905	10	0	1	905	1	905	0	1812
ESALQ_615	MROB_1421	99.83	593	1	0	1	593	1	593	0	1214
ESALQ_616	MROB_1422	100.00	323	0	0	1	323	1	323	0	663
ESALQ_617	MROB_1423	98.46	1692	23	1	1	1692	1	1689	0	3387
ESALQ_618	MROB_1424	96.88	417	7	2	1	411	1	417	0	811
ESALQ_621	MROB_1427	99.58	480	2	0	1	480	1	480	0	963
ESALQ_622	MROB_1428	99.69	322	1	0	1	322	1	322	0	645
ESALQ_623	MROB_1429	93.11	363	25	0	1	363	1	363	0	675
ESALQ_624	MROB_1430	99.48	1524	8	0	1	1524	1	1524	0	3003
ESALQ_626	MROB_1432	99.71	339	1	0	1	339	1	339	0	704
ESALQ_627	MROB_1433	87.14	350	6	1	1	311	1	350	0	598
ESALQ_629	MROB_1435	97.62	252	6	0	1	252	4	255	0	502
ESALQ_630	MROB_1436	99.24	264	2	0	1	264	1	264	0	540
ESALQ_631	MROB_1437	98.06	310	4	1	1	308	1	310	0	618
ESALQ_632	MROB_1438	99.09	984	9	0	1	984	1	984	0	1944
ESALQ_633	MROB_1439	97.86	701	14	1	1	700	1	701	0	1381
ESALQ_634	MROB_1440	92.11	545	17	4	1	544	18	537	0	953
ESALQ_635	MROB_1441	98.30	587	10	0	1	587	1	587	0	1187
ESALQ_638	MROB_1443	97.77	493	6	1	1	488	1	493	0	989
ESALQ_639	MROB_1444	97.66	1199	28	0	1	1199	1	1199	0	2383
ESALQ_640	MROB_1445	93.91	394	17	1	1	394	1	387	0	765
ESALQ_641	MROB_1446	97.18	319	9	0	1	319	1	319	0	639
ESALQ_642	MROB_1447	96.49	399	14	0	1	399	1	399	0	794
ESALQ_643	MROB_1448	97.18	319	9	0	1	319	1	319	0	650
ESALQ_645	MROB_1450	100.00	509	0	0	59	567	12	520	0	1039
ESALQ_646	MROB_1451	98.11	475	9	0	1	475	1	475	0	955
ESALQ_647	MROB_1452	99.67	303	1	0	2	304	19	321	0	619
ESALQ_648	MROB_1453	99.41	337	2	0	1	337	1	337	0	687
ESALQ_649	MROB_1454	98.90	724	8	0	1	724	1	724	0	1468
ESALQ_651	MROB_1456	95.17	642	25	2	1	638	1	640	0	1196
ESALQ_652	MROB_1458	99.78	453	1	0	1	453	1	453	0	942
ESALQ_653	MROB_1459	99.22	511	4	0	1	511	1	511	0	1053
ESALQ_654	MROB_1460	98.80	498	6	0	1	498	1	498	0	1014
ESALQ_655	MROB_1461	98.85	348	3	1	10	357	122	468	0	681
ESALQ_656	MROB_1462	99.84	619	1	0	1	619	1	619	0	1282
ESALQ_658	MROB_1464	99.43	350	2	0	1	350	1	350	0	714
ESALQ_659	MROB_1465	70.87	563	24	7	1	442	1	544	0	706
ESALQ_661	MROB_1467	99.26	405	3	0	1	405	1	405	0	835
ESALQ_663	MROB_1469	98.47	522	8	0	1	522	1	522	0	1067
ESALQ_664	MROB_1470	98.06	413	8	0	447	859	1	413	0	799
ESALQ_665	MROB_1472	98.89	451	5	0	1	451	1	451	0	925
ESALQ_666	MROB_1473	94.72	284	14	1	1	284	1	283	0	541
ESALQ_667	MROB_1474	96.04	429	17	0	1	429	1	429	0	830
ESALQ_668	MROB_1475	96.74	399	12	1	1	399	1	398	0	790
ESALQ_669	MROB_1476	98.98	1269	13	0	1	1269	118	1386	0	2600
ESALQ_670	MROB_1477	99.07	535	5	0	1	535	1	535	0	1087
ESALQ_671	MROB_1478	98.04	255	5	0	1	255	1	255	0	512
ESALQ_672	MROB_1479	98.69	611	8	0	1	611	1	611	0	1249
ESALQ_673	MROB_1480	97.07	443	13	0	1	443	1	443	0	885
ESALQ_674	MROB_1481	100.00	486	0	0	1	486	1	486	0	1007
ESALQ_676	MROB_1483	99.80	497	1	0	1	497	1	497	0	1025
ESALQ_677	MROB_1484	98.86	1665	19	0	1	1665	1	1665	0	3388
ESALQ_678	MROB_1485	99.07	858	8	0	1	858	1	858	0	1653
ESALQ_679	MROB_1486	99.49	1944	8	1	1	1944	1	1942	0	3711
ESALQ_680	MROB_1487	100.00	450	0	0	1	450	1	450	0	941
ESALQ_681	MROB_1488	91.69	313	5	1	92	404	59	350	0	593
ESALQ_682	MROB_1489	97.74	707	16	0	1	707	1	707	0	1212
ESALQ_683	MROB_1490	99.14	934	8	0	1	934	1	934	0	1894
ESALQ_684	MROB_1491	99.64	281	1	0	1	281	1	281	0	582
ESALQ_685	MROB_1492	97.26	1569	43	0	1	1569	1	1569	0	3123
ESALQ_686	MROB_1493	99.31	722	5	0	1	722	1	722	0	1489
ESALQ_688	MROB_1495	98.91	459	5	0	1	459	1	459	0	929
ESALQ_689	MROB_1496	97.37	609	16	0	1	609	1	609	0	1225
ESALQ_690	MROB_1497	97.01	1036	28	1	1	1036	1	1033	0	1716
ESALQ_691	MROB_1498	98.19	441	6	1	1	439	1	441	0	842
ESALQ_692	MROB_1500	98.03	558	11	0	1	558	1	558	0	1137
ESALQ_695	MROB_1504	96.06	457	17	1	1	456	1	457	0	896
ESALQ_696	MROB_1505	97.86	421	9	0	1	421	1	421	0	715
ESALQ_697	MROB_1506	97.95	635	13	0	29	663	1	635	0	1290
ESALQ_698	MROB_1507	98.81	755	9	0	1	755	1	755	0	1535
ESALQ_699	MROB_1508	96.57	379	13	0	1	379	1	379	0	752
ESALQ_700	MROB_1509	98.02	555	11	0	1	555	1	555	0	1101
ESALQ_701	MROB_1510	99.80	1955	4	0	1	1955	1	1955	0	4051
ESALQ_702	MROB_1512	99.61	258	1	0	80	337	1	258	0	530
ESALQ_703	MROB_1513	95.45	571	3	1	1	548	176	746	0	1099
ESALQ_704	MROB_1514	93.98	498	28	2	1	496	1	498	0	935
ESALQ_705	MROB_1515	98.82	592	7	0	1	592	1	592	0	1228
ESALQ_706	MROB_1516	97.22	540	15	0	1	540	1	540	0	1084
ESALQ_709	MROB_1519	97.21	359	10	0	49	407	2	360	0	716
ESALQ_710	MROB_1520	98.36	365	6	0	1	365	1	365	0	748
ESALQ_711	MROB_1521	98.71	1322	17	0	1	1322	1	1322	0	2702
ESALQ_712	MROB_1522	99.82	555	1	0	1	555	1	555	0	1159
ESALQ_714	MROB_1524	98.31	295	5	0	1	295	1	295	0	606
ESALQ_715	MROB_1525	91.39	418	36	0	2	419	1	418	0	753
ESALQ_716	MROB_1526	97.80	410	9	0	1	410	1	410	0	831
ESALQ_717	MROB_1527	97.61	293	7	0	114	406	3	295	0	595
ESALQ_719	MROB_1529	99.44	1070	6	0	1	1070	1	1070	0	2196
ESALQ_720	MROB_1530	99.19	991	8	0	1	991	1	991	0	2018
ESALQ_721	MROB_1531	93.68	269	3	1	1	255	1	269	0	510
ESALQ_723	MROB_1533	94.61	334	14	1	1	334	1	330	0	584
ESALQ_724	MROB_1534	97.82	641	14	0	1	641	1	641	0	1306
ESALQ_725	MROB_1535	96.09	588	3	2	1	570	1	586	0	1138
ESALQ_727	MROB_1537	90.34	445	43	0	1	445	1	445	0	537
ESALQ_729	MROB_1539	93.14	1006	17	2	1	954	1	1006	0	1931
ESALQ_730	MROB_1540	99.55	890	4	0	1	890	1	890	0	1835
ESALQ_731	MROB_1541	97.94	339	7	0	1	339	1	339	0	696
ESALQ_732	MROB_1542	99.34	454	3	0	1	454	1	454	0	937
ESALQ_733	MROB_1543	98.90	1086	6	1	1	1086	1	1080	0	2196
ESALQ_734	MROB_1544	95.15	721	13	1	1	721	1	699	0	1432
ESALQ_735	MROB_1545	96.45	564	19	1	1	563	1	564	0	1121
ESALQ_736	MROB_1546	98.21	335	6	0	15	349	14	348	0	679
ESALQ_737	MROB_1547	94.85	990	43	2	1	990	1	982	0	1895
ESALQ_738	MROB_1548	98.97	388	4	0	1	388	1	388	0	793
ESALQ_739	MROB_1549	98.78	821	10	0	1	821	1	821	0	1674
ESALQ_740	MROB_1550	99.10	556	5	0	1	556	1	556	0	1150
ESALQ_742	MROB_1552	96.15	312	11	1	1	312	1	311	0	615
ESALQ_743	MROB_1553	96.76	340	11	0	1	340	1	340	0	663
ESALQ_744	MROB_1554	99.35	461	3	0	1	461	1	461	0	959
ESALQ_745	MROB_1555	99.63	273	1	0	1	273	1	273	0	561
ESALQ_748	MROB_1557	98.83	513	3	1	1	513	1	510	0	1046
ESALQ_749	MROB_1558	99.85	649	1	0	1	649	1	649	0	1349
ESALQ_750	MROB_1559	97.47	554	14	0	1	554	1	554	0	1132
ESALQ_751	MROB_1560	98.87	794	9	0	1	794	1	794	0	1560
ESALQ_752	MROB_1561	99.46	2030	11	0	1	2030	1	2030	0	4064
ESALQ_754	MROB_1563	95.06	324	16	0	34	357	1	324	0	623
ESALQ_756	MROB_1565	95.44	351	16	0	1	351	1	351	0	699
ESALQ_758	MROB_1567	98.09	314	5	1	1	314	1	313	0	537
ESALQ_759	MROB_1568	99.65	862	3	0	1	862	1	862	0	1784
ESALQ_760	MROB_1569	98.08	260	5	0	1	260	1	260	0	534
ESALQ_761	MROB_1570	100.00	249	0	0	1	249	1	249	0	507
ESALQ_763	MROB_1572	99.40	1162	7	0	1	1162	1	1162	0	2393
ESALQ_764	MROB_1573	94.53	439	24	0	1	439	1	439	0	865
ESALQ_765	MROB_1574	99.62	1046	3	1	1	1046	1	1045	0	2146
ESALQ_766	MROB_1575	98.92	279	3	0	1	279	1	279	0	578
ESALQ_767	MROB_1576	99.80	492	1	0	1	492	1	492	0	998
ESALQ_768	MROB_1577	97.99	448	9	0	1	448	1	448	0	904
ESALQ_769	MROB_1578	99.58	947	4	0	1	947	1	947	0	1957
ESALQ_772	MROB_1581	99.37	315	2	0	1	315	1	315	0	627
ESALQ_773	MROB_1582	93.07	404	26	1	1	402	1	404	0	642
ESALQ_774	MROB_1583	99.20	249	2	0	1	249	1	249	0	505
ESALQ_775	MROB_1584	97.56	860	21	0	15	874	55	914	0	1697
ESALQ_776	MROB_1585	100.00	251	0	0	1	251	1	251	0	522
ESALQ_777	MROB_1586	98.27	579	9	1	1	579	1	578	0	1065
ESALQ_778	MROB_1587	97.57	535	12	1	1	534	1	535	0	1057
ESALQ_779	MROB_1588	99.12	685	5	1	1	685	1	684	0	1396
ESALQ_780	MROB_1589	98.00	599	12	0	1	599	1	599	0	1217
ESALQ_781	MROB_1590	96.21	4832	133	1	1	4832	1	4782	0	9619
ESALQ_782	MROB_1591	98.61	575	8	0	6	580	1	575	0	1171
ESALQ_783	MROB_1592	99.45	544	3	0	1	544	1	544	0	1126
ESALQ_785	MROB_1594	99.41	509	3	0	1	509	1	509	0	1043
ESALQ_787	MROB_1595	99.31	577	4	0	1	577	1	577	0	1189
ESALQ_788	MROB_1596	99.72	356	1	0	1	356	1	356	0	730
ESALQ_790	MROB_1597	98.35	1511	7	1	1	1493	1	1511	0	3083
ESALQ_791	MROB_1598	99.51	814	4	0	1	814	1	814	0	1689
ESALQ_792	MROB_1599	97.32	448	8	1	1	444	1	448	0	832
ESALQ_793	MROB_1600	96.52	402	14	0	1	402	1	402	0	764
ESALQ_794	MROB_1601	100.00	1157	0	0	1	1157	1	1157	0	2411
ESALQ_795	MROB_1602	99.51	1023	5	0	1	1023	1	1023	0	2111
ESALQ_797	MROB_1604	97.13	872	25	0	1	872	1	872	0	1731
ESALQ_798	MROB_1605	99.34	302	1	1	1	302	1	301	0	605
ESALQ_799	MROB_1606	99.66	297	1	0	1	297	1	297	0	609
ESALQ_800	MROB_1607	99.59	245	1	0	1	245	1	245	0	504
ESALQ_801	MROB_1608	99.65	571	2	0	415	985	345	915	0	1176
ESALQ_803	MROB_1610	99.80	501	1	0	1	501	1	501	0	1030
ESALQ_805	MROB_1612	98.09	1989	21	1	1	1972	1	1989	0	3922
ESALQ_806	MROB_1613	99.67	305	1	0	1	305	1	305	0	616
ESALQ_807	MROB_1614	98.86	615	5	1	4	618	68	680	0	1222
ESALQ_808	MROB_1615	99.13	458	4	0	1	458	1	458	0	914
ESALQ_809	MROB_1616	98.38	863	12	2	1	862	1	862	0	1717
ESALQ_811	MROB_1618	89.69	524	49	3	1	522	1	521	0	801
ESALQ_813	MROB_1620	100.00	449	0	0	1	449	1	449	0	944
ESALQ_814	MROB_1621	99.46	370	2	0	1	370	1	370	0	763
ESALQ_815	MROB_1622	100.00	511	0	0	1	511	1	511	0	1045
ESALQ_816	MROB_1623	99.77	857	2	0	1	857	1	857	0	1751
ESALQ_817	MROB_1624	97.05	305	9	0	1	305	1	305	0	599
ESALQ_820	MROB_1627	99.67	3994	13	0	1	3994	1	3994	0	8081
ESALQ_821	MROB_1628	97.95	830	17	0	117	946	37	866	0	1682
ESALQ_824	MROB_1631	95.31	320	2	1	1	307	1	320	0	620
ESALQ_825	MROB_1633	97.38	955	20	1	1	950	1	955	0	1890
ESALQ_826	MROB_1634	99.21	509	4	0	1	509	1	509	0	1053
ESALQ_829	MROB_1637	99.87	799	1	0	1	799	1	799	0	1665
ESALQ_831	MROB_1639	92.64	639	23	3	65	679	1	639	0	1178
ESALQ_832	MROB_1640	98.69	991	13	0	1	991	1	991	0	2021
ESALQ_835	MROB_1643	99.25	265	2	0	1	265	1	265	0	533
ESALQ_836	MROB_1644	99.73	750	2	0	1	750	1	750	0	1561
ESALQ_837	MROB_1645	86.93	528	20	3	1	524	86	568	0	860
ESALQ_838	MROB_1646	99.08	870	8	0	1	870	1	870	0	1760
ESALQ_840	MROB_1647	97.81	319	3	1	1	319	1	315	0	592
ESALQ_842	MROB_1648	98.85	434	5	0	1	434	1	434	0	875
ESALQ_844	MROB_1650	99.72	705	2	0	1	705	1	705	0	1455
ESALQ_845	MROB_1651	98.62	1012	14	0	1	1012	1	1012	0	2073
ESALQ_846	MROB_1652	99.68	317	1	0	1	317	1	317	0	646
ESALQ_847	MROB_1653	99.36	472	3	0	1	472	1	472	0	968
ESALQ_848	MROB_1654	99.71	679	2	0	1	679	1	679	0	1372
ESALQ_849	MROB_1655	97.79	949	0	1	1	949	1	928	0	1874
ESALQ_850	MROB_1656	97.26	475	13	0	18	492	2	476	0	958
ESALQ_851	MROB_1657	95.34	537	7	2	1	537	1	519	0	1039
ESALQ_852	MROB_1658	99.46	1118	5	1	1	1118	1	1117	0	2271
ESALQ_853	MROB_1659	98.60	570	8	0	1	570	1	570	0	1180
ESALQ_854	MROB_1660	90.65	834	45	4	1	822	1	813	0	1490
ESALQ_855	MROB_1661	97.98	743	8	1	1	743	1	736	0	1498
ESALQ_856	MROB_1662	99.81	2111	4	0	1	2111	1	2111	0	4373
ESALQ_857	MROB_1663	99.41	341	2	0	1	341	1	341	0	673
ESALQ_861	MROB_1667	94.91	806	41	0	1	806	7	812	0	1501
ESALQ_862	MROB_1668	99.22	384	3	0	1	384	1	384	0	775
ESALQ_863	MROB_1669	99.41	1011	6	0	1	1011	1	1011	0	2053
ESALQ_865	MROB_1671	99.03	518	4	1	1	517	1	518	0	1045
ESALQ_866	MROB_1672	92.65	422	15	3	1	412	1	416	0	676
ESALQ_868	MROB_1674	97.74	1414	28	2	1	1413	1	1411	0	2850
ESALQ_869	MROB_1675	99.35	620	4	0	1	620	1	620	0	1256
ESALQ_870	MROB_1676	99.28	414	3	0	111	524	36	449	0	847
ESALQ_871	MROB_1677	99.31	433	3	0	1	433	1	433	0	897
ESALQ_872	MROB_1678	100.00	691	0	0	1	691	1	691	0	1441
ESALQ_873	MROB_1679	99.55	446	2	0	1	446	1	446	0	921
ESALQ_874	MROB_1680	99.72	362	1	0	1	362	1	362	0	755
ESALQ_875	MROB_1681	98.99	296	3	0	1	296	1	296	0	600
ESALQ_876	MROB_1682	99.53	429	2	0	1	429	1	429	0	891
ESALQ_877	MROB_1683	99.60	252	1	0	1	252	1	252	0	509
ESALQ_878	MROB_1684	98.04	306	6	0	1	306	1	306	0	596
ESALQ_879	MROB_1685	99.68	308	1	0	1	308	1	308	0	629
ESALQ_880	MROB_1686	89.93	278	24	1	1	274	1	278	0	506
ESALQ_881	MROB_1687	98.25	741	12	1	35	774	1	741	0	1512
ESALQ_882	MROB_1688	94.19	1290	20	4	1	1290	1	1235	0	2413
ESALQ_884	MROB_1690	99.48	573	3	0	1	573	1	573	0	1170
ESALQ_885	MROB_1692	97.18	248	7	0	1	248	1	248	0	507
ESALQ_886	MROB_1693	90.06	332	32	1	19	349	19	350	0	585
ESALQ_887	MROB_1694	93.66	694	24	2	1	674	1	694	0	1281
ESALQ_890	MROB_1697	98.50	333	5	0	1	333	1	333	0	676
ESALQ_892	MROB_1698	97.61	419	9	1	1	419	1	418	0	841
ESALQ_893	MROB_1699	96.58	702	22	1	1	702	1	700	0	1347
ESALQ_894	MROB_1700	98.26	749	13	0	1	749	1	749	0	1535
ESALQ_896	MROB_1702	98.15	379	7	0	1	379	57	435	0	763
ESALQ_897	MROB_1703	99.72	356	1	0	1	356	1	356	0	738
ESALQ_898	MROB_1704	99.68	308	1	0	1	308	1	308	0	627
ESALQ_899	MROB_1705	97.00	634	19	0	1	634	1	634	0	1280
ESALQ_900	MROB_1706	96.76	340	6	1	1	335	1	340	0	662
ESALQ_901	MROB_1707	98.99	494	5	0	1	494	1	494	0	971
ESALQ_902	MROB_1708	99.71	688	2	0	1	688	122	809	0	1409
ESALQ_903	MROB_1709	93.50	400	18	1	115	514	16	407	0	742
ESALQ_904	MROB_1710	99.91	1119	1	0	1	1119	1	1119	0	2313
ESALQ_905	MROB_1711	98.74	714	9	0	1	714	1	714	0	1457
ESALQ_908	MROB_1714	99.37	476	3	0	1	476	1	476	0	979
ESALQ_909	MROB_1715	99.70	672	2	0	1	672	1	672	0	1327
ESALQ_911	MROB_1717	98.77	406	5	0	1	406	1	406	0	824
ESALQ_912	MROB_1718	99.77	426	1	0	1	426	1	426	0	831
ESALQ_914	MROB_1720	99.72	726	2	0	1	726	1	726	0	1487
ESALQ_915	MROB_1721	95.98	547	22	0	1	547	1	547	0	994
ESALQ_916	MROB_1722	98.33	299	5	0	1	299	1	299	0	618
ESALQ_917	MROB_1723	92.97	313	10	1	1	313	1	301	0	594
ESALQ_918	MROB_1724	97.83	507	0	1	1	496	1	507	0	1019
ESALQ_919	MROB_1725	100.00	317	0	0	1	317	1	317	0	655
ESALQ_920	MROB_1726	99.28	828	6	0	1	828	1	828	0	1671
ESALQ_921	MROB_1727	99.09	986	9	0	1	986	30	1015	0	2017
ESALQ_923	MROB_1730	99.80	492	1	0	1	492	1	492	0	1021
ESALQ_924	MROB_1731	96.84	855	26	1	1	855	1	854	0	1670
ESALQ_925	MROB_1732	99.28	277	2	0	1	277	1	277	0	569
ESALQ_928	MROB_1736	99.15	943	8	0	1	943	1	943	0	1929
ESALQ_929	MROB_1737	98.66	449	6	0	1	449	1	449	0	899
ESALQ_930	MROB_1738	98.24	681	11	1	1	680	1	681	0	1384
ESALQ_931	MROB_1739	97.57	742	18	0	1	742	1	742	0	1471
ESALQ_932	MROB_1740	97.25	327	9	0	1	327	1	327	0	658
ESALQ_933	MROB_1742	97.36	417	11	0	1	417	1	417	0	741
ESALQ_936	MROB_1743	98.54	687	10	0	1	687	1	687	0	1348
ESALQ_938	MROB_1745	98.19	609	11	0	54	662	16	624	0	1186
ESALQ_940	MROB_1747	99.36	1252	8	0	1	1252	1	1252	0	2566
ESALQ_941	MROB_1748	95.96	718	7	2	1	718	1	696	0	1404
ESALQ_943	MROB_1749	98.96	578	6	0	1	578	1	578	0	1112
ESALQ_945	MROB_1750	98.95	574	6	0	1	574	1	574	0	1171
ESALQ_947	MROB_1751	97.59	1409	30	2	1	1408	1	1406	0	2805
ESALQ_948	MROB_1752	98.68	303	4	0	1	303	1	303	0	613
ESALQ_949	MROB_1753	99.76	424	1	0	1	424	1	424	0	879
ESALQ_950	MROB_1754	99.33	601	4	0	1	601	1	601	0	1238
ESALQ_951	MROB_1755	98.77	1383	13	1	1	1383	1	1379	0	2846
ESALQ_952	MROB_1756	92.49	519	25	3	1	515	1	509	0	985
ESALQ_953	MROB_1757	100.00	799	0	0	1	799	1	799	0	1650
ESALQ_955	MROB_1759	99.73	1098	1	2	1	1097	1	1097	0	2236
ESALQ_956	MROB_1760	99.10	555	5	0	1	555	1	555	0	1135
ESALQ_957	MROB_1761	99.68	621	2	0	1	621	1	621	0	1292
ESALQ_958	MROB_1762	97.35	528	14	0	1	528	1	528	0	1084
ESALQ_959	MROB_1763	99.14	465	4	0	1	465	1	465	0	950
ESALQ_960	MROB_1764	91.79	329	24	1	1	326	1	329	0	559
ESALQ_961	MROB_1765	99.80	510	1	0	1	510	1	510	0	1046
ESALQ_962	MROB_1766	97.79	408	9	0	1	408	1	408	0	818
ESALQ_963	MROB_1767	99.46	555	3	0	1	555	1	555	0	1139
ESALQ_965	MROB_110	98.64	368	5	0	1	368	1	368	0	756
ESALQ_966	MROB_109	98.61	431	6	0	1	431	29	459	0	867
ESALQ_967	MROB_108	86.17	405	20	1	1	369	1	405	0	572
ESALQ_968	MROB_107	99.27	548	4	0	39	586	5	552	0	1112
ESALQ_969	MROB_106	98.17	273	5	0	1	273	1	273	0	555
ESALQ_970	MROB_105	99.63	536	2	0	1	536	1	536	0	1112
ESALQ_971	MROB_104	97.08	274	6	1	1	274	1	272	0	553
ESALQ_972	MROB_103	94.77	363	16	2	1	363	39	398	0	675
ESALQ_973	MROB_10837	89.75	712	73	0	1	712	1	712	0	1305
ESALQ_974	MROB_10836	84.58	415	22	2	1	373	1	415	0	703
ESALQ_976	MROB_10835	98.19	443	7	1	1	443	1	442	0	894
ESALQ_977	MROB_10834	98.98	587	6	0	1	587	1	587	0	1213
ESALQ_978	MROB_10833	99.20	497	3	1	1	497	1	496	0	1006
ESALQ_979	MROB_10832	98.85	522	6	0	1	522	1	522	0	1067
ESALQ_981	MROB_10830	94.46	1192	15	2	1	1191	1	1142	0	2255
ESALQ_982	MROB_10826	95.29	510	2	1	1	488	1	510	0	988
ESALQ_984	MROB_10824	98.23	736	13	0	1	736	1	736	0	1471
ESALQ_985	MROB_10823	98.36	609	10	0	1	609	1	609	0	1234
ESALQ_986	MROB_10821	98.37	491	8	0	1	491	1	491	0	993
ESALQ_987	MROB_1768	97.27	403	11	0	224	626	1	403	0	798
ESALQ_988	MROB_1770	95.74	516	10	1	1	504	1	516	0	1004
ESALQ_989	MROB_1771	98.13	643	12	0	43	685	5	647	0	1295
ESALQ_990	MROB_1772	98.41	252	4	0	1	252	1	252	0	501
ESALQ_991	MROB_1773	93.64	535	34	0	1	535	1	535	0	972
ESALQ_992	MROB_1774	97.79	724	16	0	1	724	1	724	0	1471
ESALQ_993	MROB_1775	100.00	385	0	0	1	385	1	385	0	701
ESALQ_994	MROB_1776	99.72	355	1	0	1	355	1	355	0	729
ESALQ_995	MROB_1777	100.00	324	0	0	1	324	1	324	0	651
ESALQ_996	MROB_1778	98.93	281	3	0	1	281	1	281	0	584
ESALQ_997	MROB_1779	96.30	487	18	0	1	487	1	487	0	966
ESALQ_998	MROB_1780	96.97	1352	39	1	1	1352	1	1350	0	2539
ESALQ_1000	MROB_1783	98.80	1589	19	0	1	1589	1	1589	0	3241
ESALQ_1002	MROB_1785	99.15	591	5	0	1	591	1	591	0	1192
ESALQ_1003	MROB_1786	82.68	560	43	8	1	514	1	552	0	889
ESALQ_1004	MROB_1787	97.36	265	7	0	1	265	1	265	0	539
ESALQ_1005	MROB_1788	97.62	378	9	0	1	378	1	378	0	722
ESALQ_1006	MROB_1789	96.48	426	15	0	1	426	1	426	0	846
ESALQ_1007	MROB_1790	93.22	339	23	0	1	339	1	339	0	629
ESALQ_1008	MROB_1791	96.65	358	12	0	1	358	1	358	0	717
ESALQ_1010	MROB_1793	97.23	361	5	2	1	356	1	361	0	697
ESALQ_1011	MROB_1794	98.80	334	4	0	1	334	1	334	0	679
ESALQ_1012	MROB_1795	96.21	290	11	0	1	290	1	290	0	563
ESALQ_1013	MROB_1796	92.77	512	10	1	1	485	1	512	0	963
ESALQ_1014	MROB_1797	95.04	383	6	3	1	370	1	383	0	726
ESALQ_1015	MROB_1798	99.83	605	1	0	1	605	1	605	0	1187
ESALQ_1016	MROB_1799	97.02	537	16	0	1	537	1	537	0	1085
ESALQ_1019	MROB_1802	97.24	544	15	0	1	544	1	544	0	1105
ESALQ_1020	MROB_1803	90.03	291	1	1	83	373	45	307	0	522
ESALQ_1021	MROB_1804	99.02	920	9	0	1	920	1	920	0	1830
ESALQ_1022	MROB_1805	94.44	360	20	0	1	360	1	360	0	576
ESALQ_1023	MROB_1806	91.92	297	24	0	1	297	1	297	0	562
ESALQ_1024	MROB_1807	91.70	265	22	0	1	265	1	265	0	505
ESALQ_1025	MROB_1808	96.40	333	12	0	1	333	1	333	0	669
ESALQ_1026	MROB_1809	92.23	386	10	1	1	366	1	386	0	732
ESALQ_1028	MROB_1811	83.37	463	46	1	1	432	1	463	0	794
ESALQ_1029	MROB_1812	98.58	281	4	0	1	281	1	281	0	574
ESALQ_1030	MROB_1813	98.51	808	12	0	1	808	1	808	0	1657
ESALQ_1031	MROB_1814	98.37	368	5	1	1	368	1	367	0	756
ESALQ_1032	MROB_1815	86.07	1421	153	6	1	1402	1	1395	0	2474
ESALQ_1034	MROB_1817	95.39	803	31	3	1	800	1	800	0	1562
ESALQ_1035	MROB_1818	98.01	301	6	0	1	301	129	429	0	599
ESALQ_1039	MROB_1821	91.15	305	26	1	1	304	1	305	0	546
ESALQ_1040	MROB_1822	96.09	358	14	0	1	358	1	358	0	723
ESALQ_1043	MROB_1824	93.02	1160	76	1	1	1155	1	1160	0	2175
ESALQ_1044	MROB_1825	92.59	580	43	0	1	580	1	580	0	1085
ESALQ_1047	MROB_1828	93.54	325	2	1	1	306	1	325	0	625
ESALQ_1048	MROB_1829	95.66	415	2	1	1	399	1	415	0	818
ESALQ_1049	MROB_1830	88.54	288	7	1	1	288	1	262	0	509
ESALQ_1055	MROB_11087	99.27	273	2	0	22	294	1	273	0	568
ESALQ_1056	MROB_11088	99.68	626	2	0	1	626	1	626	0	1300
ESALQ_1057	MROB_1834	99.61	258	1	0	1	258	1	258	0	539
ESALQ_1058	MROB_10807	95.42	306	14	0	1	306	1	306	0	615
ESALQ_1059	MROB_10806	97.00	267	8	0	1	267	1	267	0	539
ESALQ_1061	MROB_10805	97.64	296	7	0	1	296	1	296	0	611
ESALQ_1062	MROB_10804	90.93	353	15	1	1	353	1	336	0	660
ESALQ_1065	MROB_10802	92.88	562	37	2	1	562	1	559	0	915
ESALQ_1066	MROB_10801	98.82	1016	11	1	1	1016	1	1015	0	2045
ESALQ_1067	MROB_10800	99.06	533	5	0	1	533	1	533	0	1087
ESALQ_1069	MROB_10798	99.61	2588	10	0	1	2588	3	2590	0	5340
ESALQ_1071	MROB_10796	99.56	454	2	0	1	454	1	454	0	933
ESALQ_1072	MROB_10795	97.97	395	8	0	1	395	19	413	0	800
ESALQ_1074	MROB_10793	94.17	703	41	0	1	703	1	703	0	1294
ESALQ_1076	MROB_10791	99.89	907	1	0	1	907	1	907	0	1846
ESALQ_1077	MROB_10839	98.57	349	4	1	1	348	1	349	0	704
ESALQ_1078	MROB_10840	92.09	759	52	1	36	786	1	759	0	1341
ESALQ_1083	MROB_10844	96.88	256	8	0	88	343	72	327	0	515
ESALQ_1085	MROB_10846	97.64	297	7	0	1	297	1	297	0	607
ESALQ_1087	MROB_10848	99.64	275	1	0	1	275	1	275	0	560
ESALQ_1088	MROB_10849	97.66	384	0	1	1	384	1	375	0	762
ESALQ_1089	MROB_10850	100.00	342	0	0	23	364	52	393	0	700
ESALQ_1090	MROB_10851	99.03	310	3	0	1	310	1	310	0	591
ESALQ_1091	MROB_10852	99.61	519	2	0	1	519	1	519	0	1065
ESALQ_1092	MROB_10854	98.66	1340	16	1	1	1340	1	1338	0	2727
ESALQ_1094	MROB_3724	98.59	354	5	0	1	354	1	354	0	728
ESALQ_1095	MROB_3723	83.20	375	57	3	127	496	271	644	0	621
ESALQ_1096	MROB_3722	99.63	543	2	0	1	543	1	543	0	1093
ESALQ_1098	MROB_3720	99.30	570	4	0	1	570	1	570	0	1179
ESALQ_1100	MROB_3718	96.90	871	27	0	1	871	1	871	0	1762
ESALQ_1101	MROB_3717	98.56	486	7	0	1	486	1	486	0	981
ESALQ_1102	MROB_3716	80.59	819	114	6	1	818	1	775	0	1282
ESALQ_1103	MROB_3715	98.59	568	8	0	1	568	1	568	0	1159
ESALQ_1104	MROB_3714	99.09	548	5	0	20	567	43	590	0	1110
ESALQ_1106	MROB_3713	98.72	701	9	0	1	701	1	701	0	1442
ESALQ_1107	MROB_3712	100.00	343	0	0	1	343	1	343	0	711
ESALQ_1108	MROB_3711	87.66	1248	154	0	1	1248	1	1248	0	2229
ESALQ_1109	MROB_3710	90.00	340	18	1	40	379	1	324	0	621
ESALQ_1110	MROB_3709	99.32	585	3	1	1	584	1	585	0	1186
ESALQ_1111	MROB_3708	99.79	472	1	0	1	472	1	472	0	984
ESALQ_1112	MROB_3707	98.03	406	8	0	1	406	1	406	0	837
ESALQ_1113	MROB_3706	97.82	321	7	0	1	321	1	321	0	650
ESALQ_1114	MROB_3705	88.28	1032	63	6	2	978	1	1029	0	1826
ESALQ_1115	MROB_3704	99.32	1032	7	0	1	1032	1	1032	0	2109
ESALQ_1116	MROB_3703	99.45	363	2	0	1	363	1	363	0	747
ESALQ_1117	MROB_6278	94.28	367	19	1	334	700	144	508	0	726
ESALQ_1118	MROB_3701	99.80	505	1	0	1	505	1	505	0	1033
ESALQ_1119	MROB_3700	99.08	542	5	0	1	542	1	542	0	1103
ESALQ_1120	MROB_3699	96.91	809	8	1	1	792	1	809	0	1557
ESALQ_1121	MROB_3698	97.42	660	17	0	1	660	1	660	0	1331
ESALQ_1124	MROB_3697	97.93	723	15	0	1	723	1	723	0	1444
ESALQ_1125	MROB_3696	95.37	605	5	1	1	605	1	582	0	1149
ESALQ_1126	MROB_3695	99.46	739	4	0	1	739	1	739	0	1520
ESALQ_1127	MROB_3694	96.89	418	13	0	1	418	1	418	0	833
ESALQ_1128	MROB_3693	92.64	326	5	1	452	777	272	578	0	602
ESALQ_1129	MROB_3692	98.90	546	6	0	1	546	1	546	0	1112
ESALQ_1130	MROB_3691	98.58	352	5	0	40	391	1	352	0	712
ESALQ_1131	MROB_3690	98.87	353	4	0	1	353	1	353	0	731
ESALQ_1132	MROB_3689	100.00	435	0	0	1	435	1	435	0	896
ESALQ_1133	MROB_3688	90.95	486	14	3	1	486	1	456	0	756
ESALQ_1134	MROB_3687	99.44	1074	6	0	1	1074	1	1074	0	2226
ESALQ_1135	MROB_3686	100.00	335	0	0	1	335	1	335	0	691
ESALQ_1137	MROB_3684	98.43	445	3	1	1	441	1	445	0	893
ESALQ_1138	MROB_3683	98.12	480	9	0	1	480	1	480	0	967
ESALQ_1142	MROB_3678	99.39	495	3	0	1	495	1	495	0	1026
ESALQ_1143	MROB_3677	98.55	690	10	0	1	690	1	690	0	1404
ESALQ_1144	MROB_3676	98.81	335	4	0	1	335	1	335	0	685
ESALQ_1146	MROB_3674	99.11	898	8	0	1	898	1	898	0	1843
ESALQ_1147	MROB_3673	91.63	526	35	1	1	517	1	526	0	930
ESALQ_1148	MROB_3672	100.00	562	0	0	1	562	1	562	0	1184
ESALQ_1149	MROB_3671	99.32	292	2	0	1	292	1	292	0	598
ESALQ_1150	MROB_3670	99.44	358	2	0	1	358	1	358	0	739
ESALQ_1151	MROB_3669	98.92	744	8	0	1	744	1	744	0	1524
ESALQ_1152	MROB_3668	99.76	417	1	0	1	417	1	417	0	835
ESALQ_1153	MROB_3667	98.17	547	6	1	1	543	1	547	0	1033
ESALQ_1154	MROB_3666	99.59	488	2	0	1	488	1	488	0	989
ESALQ_1156	MROB_3664	99.67	300	1	0	1	300	1	300	0	587
ESALQ_1157	MROB_3663	99.19	621	5	0	1	621	1	621	0	1265
ESALQ_1159	MROB_3661	95.21	480	2	1	1	459	1	480	0	920
ESALQ_1160	MROB_3659	99.74	380	1	0	1	380	1	380	0	753
ESALQ_1163	MROB_3656	96.77	589	19	0	1	589	1	589	0	1174
ESALQ_1164	MROB_3655	99.32	738	5	0	1	738	1	738	0	1485
ESALQ_1167	MROB_3652	95.73	1945	83	0	1	1945	1	1945	0	3659
ESALQ_1168	MROB_3651	90.49	431	24	1	1	431	1	414	0	775
ESALQ_1169	MROB_3650	97.65	255	6	0	1	255	1	255	0	520
ESALQ_1170	MROB_3649	96.57	321	11	0	1	321	1	321	0	612
ESALQ_1171	MROB_3648	94.04	285	8	1	9	284	1	285	0	552
ESALQ_1172	MROB_3647	97.12	486	14	0	1	486	135	620	0	975
ESALQ_1174	MROB_3645	98.61	504	6	1	1	504	1	503	0	1036
ESALQ_1176	MROB_3643	98.99	595	6	0	1	595	1	595	0	1199
ESALQ_1177	MROB_3642	95.64	436	7	1	1	424	87	522	0	855
ESALQ_1178	MROB_3639	99.09	548	5	0	1	548	1	548	0	1132
ESALQ_1180	MROB_3638	98.93	466	5	0	1	466	1	466	0	934
ESALQ_1181	MROB_3637	98.62	506	7	0	1	506	1	506	0	1034
ESALQ_1182	MROB_3636	98.57	977	14	0	1	977	1	977	0	1988
ESALQ_1185	MROB_3634	99.43	351	2	0	1	351	1	351	0	702
ESALQ_1186	MROB_3633	94.97	378	17	1	1	376	1	378	0	595
ESALQ_1187	MROB_3632	99.69	326	1	0	1	326	1	326	0	665
ESALQ_1188	MROB_3631	96.60	530	18	0	1	530	1	530	0	1051
ESALQ_1190	MROB_3629	98.86	528	6	0	1	528	1	528	0	1078
ESALQ_1191	MROB_3628	95.77	378	16	0	1	378	1	378	0	760
ESALQ_1192	MROB_3627	97.16	423	12	0	1	423	1	423	0	852
ESALQ_1193	MROB_3626	98.45	322	5	0	1	322	1	322	0	647
ESALQ_1194	MROB_3625	99.64	548	2	0	1	548	1	548	0	1132
ESALQ_1196	MROB_3623	95.03	302	15	0	8	309	1	302	0	541
ESALQ_1197	MROB_3622	98.00	549	11	0	1	549	1	549	0	1100
ESALQ_1198	MROB_3621	97.02	503	15	0	1	503	1	503	0	1012
ESALQ_1199	MROB_3620	98.76	322	4	0	1	322	1	322	0	653
ESALQ_1200	MROB_3619	98.88	714	8	0	1	714	1	714	0	1456
ESALQ_1201	MROB_3618	97.73	309	7	0	1	309	1	309	0	615
ESALQ_1202	MROB_3617	98.82	508	6	0	65	572	1	508	0	1045
ESALQ_1203	MROB_3616	95.62	868	11	2	1	841	1	868	0	1682
ESALQ_1204	MROB_3615	99.79	473	1	0	1	473	1	473	0	966
ESALQ_1205	MROB_3614	98.44	384	6	0	1	384	1	384	0	776
ESALQ_1207	MROB_3612	99.42	1391	8	0	1	1391	1	1391	0	2812
ESALQ_1208	MROB_3611	100.00	439	0	0	1	439	1	439	0	908
ESALQ_1209	MROB_3610	97.59	704	17	0	1	704	1	704	0	1423
ESALQ_1210	MROB_3609	100.00	624	0	0	1	624	1	624	0	1285
ESALQ_1212	MROB_3607	98.79	495	6	0	1	495	1	495	0	968
ESALQ_1213	MROB_3605	95.56	946	24	2	1	946	1	928	0	1820
ESALQ_1214	MROB_3604	100.00	433	0	0	1	433	1	433	0	909
ESALQ_1216	MROB_3602	99.70	337	1	0	1	337	1	337	0	695
ESALQ_1217	MROB_3601	99.63	544	2	0	1	544	1	544	0	1125
ESALQ_1218	MROB_3600	99.23	912	7	0	1	912	1	912	0	1865
ESALQ_1219	MROB_3599	98.48	526	8	0	1	526	1	526	0	1065
ESALQ_1220	MROB_3598	91.54	331	23	2	1	327	1	330	0	578
ESALQ_1221	MROB_3597	99.58	711	3	0	1	711	1	711	0	1471
ESALQ_1222	MROB_3596	98.93	1120	12	0	1	1120	1	1120	0	2264
ESALQ_1223	MROB_3595	99.14	347	3	0	1	347	1	347	0	714
ESALQ_1226	MROB_3592	99.40	666	4	0	1	666	983	1648	0	1388
ESALQ_1227	MROB_3592	98.52	944	14	0	1	944	1	944	0	1909
ESALQ_1229	MROB_3590	99.45	365	2	0	1	365	1	365	0	711
ESALQ_1230	MROB_3589	99.33	594	4	0	1	594	1	594	0	1206
ESALQ_1231	MROB_3588	99.23	1291	10	0	1	1291	1	1291	0	2581
ESALQ_1232	MROB_3587	99.37	478	3	0	1	478	1	478	0	989
ESALQ_1234	MROB_3585	95.24	609	8	1	1	588	1	609	0	1159
ESALQ_1235	MROB_3584	99.19	371	3	0	1	371	92	462	0	768
ESALQ_1237	MROB_3582	98.93	562	6	0	1	562	1	562	0	1164
ESALQ_1239	MROB_3580	98.88	627	6	1	1	627	1	626	0	1244
ESALQ_1240	MROB_3579	97.03	1010	30	0	1	1010	1	1010	0	2042
ESALQ_1241	MROB_3578	89.11	395	6	1	1	358	1	395	0	709
ESALQ_1242	MROB_3577	98.32	772	2	1	1	761	1	772	0	1564
ESALQ_1243	MROB_3576	97.70	434	10	0	1	434	1	434	0	824
ESALQ_1245	MROB_3574	97.68	302	7	0	1	302	1	302	0	587
ESALQ_1246	MROB_3573	99.84	1257	2	0	1	1257	1	1257	0	2553
ESALQ_1247	MROB_3572	99.81	539	1	0	1	539	1	539	0	1088
ESALQ_1249	MROB_3570	97.82	596	13	0	1	596	1	596	0	1195
ESALQ_1251	MROB_3568	99.17	599	2	2	1	596	1	599	0	1215
ESALQ_1252	MROB_3567	98.52	1149	17	0	1	1149	110	1258	0	2312
ESALQ_1254	MROB_3566	97.79	362	8	0	1	362	1	362	0	721
ESALQ_1255	MROB_3565	98.37	367	6	0	1	367	1	367	0	752
ESALQ_1258	MROB_3562	92.15	344	27	0	1	344	1	344	0	655
ESALQ_1259	MROB_3561	97.05	577	17	0	157	733	1	577	0	1161
ESALQ_1260	MROB_10872	98.83	342	4	0	1	342	1	342	0	699
ESALQ_1261	MROB_10871	97.77	537	11	1	1	537	1	536	0	1053
ESALQ_1262	MROB_10870	97.59	291	7	0	1	291	1	291	0	585
ESALQ_1265	MROB_3555	97.30	333	7	1	1	333	1	331	0	627
ESALQ_1266	MROB_3556	93.35	451	27	1	1	448	1	451	0	785
ESALQ_1268	MROB_3558	90.91	341	30	1	1	341	1	340	0	616
ESALQ_1269	MROB_3559	92.88	1811	66	3	1	1771	1	1788	0	3476
ESALQ_1270	MROB_10873	87.79	614	40	4	1	614	1	579	0	1075
ESALQ_1271	MROB_10874	99.64	561	2	0	1	561	1	561	0	1133
ESALQ_1272	MROB_10875	97.96	637	13	0	170	806	1	637	0	1262
ESALQ_1273	MROB_10876	98.09	680	13	0	1	680	1	680	0	1367
ESALQ_1274	MROB_10877	99.32	439	3	0	1	439	1	439	0	873
ESALQ_1275	MROB_10878	98.66	596	8	0	1	596	117	712	0	1177
ESALQ_1276	MROB_10879	93.27	327	4	1	39	347	1	327	0	615
ESALQ_1277	MROB_10880	80.00	470	74	5	1	465	1	455	0	735
ESALQ_1278	MROB_10881	99.56	458	2	0	1	458	1	458	0	954
ESALQ_1279	MROB_10882	98.96	1447	15	0	1	1447	1	1447	0	2950
ESALQ_1281	MROB_10883	98.25	285	5	0	1	285	1	285	0	560
ESALQ_1282	MROB_3553	98.74	318	4	0	1	318	1	318	0	638
ESALQ_1283	MROB_3552	97.98	1141	21	1	1	1139	1	1141	0	2239
ESALQ_1284	MROB_3551	98.04	612	12	0	1	612	1	612	0	1199
ESALQ_1285	MROB_3550	99.67	905	3	0	1	905	1	905	0	1850
ESALQ_1286	MROB_3549	94.94	356	18	0	1	356	1	356	0	662
ESALQ_1289	MROB_3546	94.58	535	29	0	1	535	1	535	0	1028
ESALQ_1290	MROB_3545	99.58	473	2	0	1	473	1	473	0	959
ESALQ_1291	MROB_3544	99.72	710	2	0	1	710	1	710	0	1483
ESALQ_1292	MROB_3543	99.27	409	3	0	1	409	1	409	0	790
ESALQ_1293	MROB_3542	98.70	539	7	0	1	539	1	539	0	1079
ESALQ_1294	MROB_3541	100.00	344	0	0	1	344	1	344	0	707
ESALQ_1296	MROB_3539	99.08	1307	8	1	1	1307	1	1303	0	2624
ESALQ_1297	MROB_3538	93.56	404	9	1	1	387	1	404	0	777
ESALQ_1298	MROB_3537	99.83	604	1	0	1	604	1	604	0	1251
ESALQ_1299	MROB_3536	99.52	1247	6	0	1	1247	1	1247	0	2570
ESALQ_1300	MROB_3535	96.44	871	18	1	1	858	1	871	0	1576
ESALQ_1303	MROB_3532	95.85	627	3	1	1	604	1	627	0	1229
ESALQ_1304	MROB_3531	95.23	1048	50	0	1	1048	1	1048	0	2028
ESALQ_1305	MROB_3530	89.83	482	13	2	1	482	1	446	0	884
ESALQ_1306	MROB_3529	99.62	261	1	0	1	261	1	261	0	527
ESALQ_1307	MROB_3528	99.69	648	1	1	137	783	8	655	0	1296
ESALQ_1308	MROB_3527	99.76	1260	3	0	1	1260	1	1260	0	2583
ESALQ_1309	MROB_3526	100.00	746	0	0	1	746	1	746	0	1540
ESALQ_1310	MROB_3525	100.00	529	0	0	1	529	1	529	0	1063
ESALQ_1311	MROB_3524	99.58	713	3	0	1	713	1	713	0	1432
ESALQ_1312	MROB_3523	99.48	384	2	0	1	384	1	384	0	788
ESALQ_1313	MROB_3522	99.58	478	2	0	1	478	1	478	0	990
ESALQ_1314	MROB_3521	90.37	405	10	2	1	378	1	403	0	731
ESALQ_1315	MROB_3519	99.62	527	2	0	1	527	1	527	0	1090
ESALQ_1316	MROB_3518	97.13	836	24	0	1	836	1	836	0	1693
ESALQ_1317	MROB_3517	98.45	1095	17	0	1	1095	1	1095	0	2230
ESALQ_1320	MROB_3515	98.28	349	6	0	1	349	17	365	0	711
ESALQ_1321	MROB_3513	97.24	254	7	0	1	254	1	254	0	527
ESALQ_1323	MROB_3511	97.80	500	11	0	1	500	1	500	0	1002
ESALQ_1324	MROB_3510	93.61	313	7	1	1	313	1	300	0	596
ESALQ_1325	MROB_3509	97.28	514	14	0	1	514	1	514	0	1045
ESALQ_1326	MROB_3508	90.89	494	30	2	1	494	1	479	0	908
ESALQ_1327	MROB_3507	97.36	265	7	0	1	265	1	265	0	514
ESALQ_1328	MROB_3506	96.40	500	18	0	10	509	10	509	0	986
ESALQ_1330	MROB_3504	98.73	1659	21	0	1	1659	1	1659	0	3400
ESALQ_1331	MROB_3503	98.48	525	8	0	1	525	1	525	0	1039
ESALQ_1332	MROB_3502	93.40	379	25	0	1	379	1	379	0	716
ESALQ_1333	MROB_3501	94.70	623	33	0	1	623	1	623	0	1221
ESALQ_1335	MROB_3498	99.68	925	3	0	70	994	46	970	0	1900
ESALQ_1336	MROB_3497	99.72	361	1	0	1	361	1	361	0	750
ESALQ_1338	MROB_3495	100.00	825	0	0	165	989	23	847	0	1642
ESALQ_1339	MROB_3494	98.67	1731	19	1	1	1727	1	1731	0	3489
ESALQ_1341	MROB_3491	99.10	670	6	0	569	1238	1	670	0	1354
ESALQ_1343	MROB_3489	96.82	723	23	0	1	723	1	723	0	1459
ESALQ_1344	MROB_3488	99.50	606	3	0	1	606	1	606	0	1238
ESALQ_1345	MROB_3487	100.00	313	0	0	1	313	1	313	0	644
ESALQ_1346	MROB_3486	99.69	635	2	0	1	635	1	635	0	1293
ESALQ_1347	MROB_3485	99.42	514	3	0	1	514	80	593	0	1060
ESALQ_1348	MROB_3484	99.64	562	2	0	1	562	1	562	0	1173
ESALQ_1349	MROB_3483	99.69	327	1	0	1	327	1	327	0	681
ESALQ_1350	MROB_3482	99.03	515	5	0	1	515	1	515	0	1058
ESALQ_1351	MROB_3481	98.25	2628	43	2	1	2626	1	2627	0	5344
ESALQ_1352	MROB_3480	99.78	451	1	0	1	451	1	451	0	906
ESALQ_1354	MROB_3478	93.13	495	9	2	1	495	1	470	0	926
ESALQ_1355	MROB_3477	96.67	630	19	1	1	630	1	628	0	1266
ESALQ_1356	MROB_3476	98.32	535	8	1	1	534	1	535	0	1072
ESALQ_1359	MROB_3473	98.05	512	10	0	1	512	1	512	0	1038
ESALQ_1360	MROB_3472	99.78	898	1	1	1	897	1	898	0	1865
ESALQ_1361	MROB_3472	97.74	399	9	0	1	399	910	1308	0	809
ESALQ_1365	MROB_3469	99.81	515	1	0	1	515	1	515	0	1061
ESALQ_1366	MROB_3468	99.05	317	3	0	1	317	101	417	0	657
ESALQ_1367	MROB_3467	98.18	823	4	1	1	812	1	823	0	1660
ESALQ_1368	MROB_3466	98.47	327	5	0	1	327	1	327	0	674
ESALQ_1370	MROB_3464	95.71	350	15	0	1	350	1	350	0	704
ESALQ_1372	MROB_3462	99.82	544	1	0	1	544	1	544	0	1105
ESALQ_1373	MROB_3461	98.35	726	12	0	1	726	1	726	0	1486
ESALQ_1374	MROB_3460	98.61	863	12	0	1	863	1	863	0	1771
ESALQ_1375	MROB_3459	98.04	1123	20	1	1	1121	1	1123	0	2254
ESALQ_1379	MROB_3455	94.99	659	17	2	1	658	1	644	0	1273
ESALQ_1380	MROB_3454	95.59	635	27	1	3	637	1	634	0	1277
ESALQ_1381	MROB_3453	98.07	415	8	0	1	415	1	415	0	848
ESALQ_1382	MROB_3452	98.31	355	6	0	1	355	1	355	0	697
ESALQ_1383	MROB_3451	94.48	580	32	0	1	580	1	580	0	1144
ESALQ_1384	MROB_3450	95.21	522	25	0	114	635	65	586	0	1018
ESALQ_1386	MROB_3448	98.15	487	7	1	1	487	1	485	0	957
ESALQ_1387	MROB_3447	99.45	541	3	0	1	541	1	541	0	1112
ESALQ_1388	MROB_3446	99.17	599	5	0	1	599	1	599	0	1248
ESALQ_1390	MROB_3444	95.17	600	8	1	1	579	1	600	0	1165
ESALQ_1391	MROB_3443	98.50	866	11	2	1	866	1	864	0	1697
ESALQ_1392	MROB_3442	99.38	324	2	0	1	324	1	324	0	674
ESALQ_1393	MROB_3441	96.60	793	18	2	1	791	1	786	0	1577
ESALQ_1394	MROB_3440	97.73	573	13	0	1	573	1	573	0	1127
ESALQ_1395	MROB_3439	96.33	381	14	0	1	381	1	381	0	745
ESALQ_1397	MROB_10957	99.58	476	1	1	1	475	812	1287	0	948
ESALQ_1398	MROB_10957	99.88	803	1	0	1	803	1	803	0	1656
ESALQ_1399	MROB_10956	99.24	919	7	0	1	919	1	919	0	1887
ESALQ_1400	MROB_10955	99.40	333	2	0	145	477	1	333	0	680
ESALQ_1403	MROB_10952	99.89	901	1	0	1	901	1	901	0	1860
ESALQ_1404	MROB_10951	100.00	471	0	0	1	471	1	471	0	960
ESALQ_1405	MROB_10950	99.30	713	5	0	1	713	1	713	0	1443
ESALQ_1406	MROB_10949	99.60	1010	4	0	1	1010	1	1010	0	2075
ESALQ_1407	MROB_10948	99.67	608	2	0	1	608	1	608	0	1256
ESALQ_1408	MROB_10947	92.56	793	59	0	259	1051	235	1027	0	1504
ESALQ_1409	MROB_10266	96.17	522	20	0	1	522	1	522	0	954
ESALQ_1410	MROB_10265	98.78	328	4	0	1	328	1	328	0	637
ESALQ_1413	MROB_10264	96.24	452	16	1	15	465	303	754	0	907
ESALQ_1416	MROB_10260	100.00	322	0	0	1	322	1	322	0	664
ESALQ_1417	MROB_9097	99.28	418	3	0	1	418	1	418	0	856
ESALQ_1418	MROB_9096	99.66	597	2	0	1	597	1	597	0	1221
ESALQ_1419	MROB_9095	99.30	287	2	0	1	287	1	287	0	584
ESALQ_1420	MROB_9094	92.81	292	6	1	1	277	1	292	0	547
ESALQ_1421	MROB_9093	98.03	356	7	0	1	356	1	356	0	721
ESALQ_1422	MROB_9092	99.03	720	7	0	1	720	1	720	0	1494
ESALQ_1423	MROB_9091	100.00	656	0	0	1	656	1	656	0	1356
ESALQ_1424	MROB_9090	98.28	466	4	4	1	466	1	462	0	915
ESALQ_1425	MROB_9089	99.40	502	3	0	1	502	1	502	0	1014
ESALQ_1426	MROB_9088	98.25	342	6	0	1	342	1	342	0	700
ESALQ_1427	MROB_9087	97.50	320	8	0	1	320	1	320	0	630
ESALQ_1428	MROB_9086	93.40	303	20	0	4	306	13	315	0	579
ESALQ_1429	MROB_9085	84.88	1316	183	3	1	1311	1	1305	0	2220
ESALQ_1430	MROB_9084	96.91	615	19	0	1	615	1	615	0	1246
ESALQ_1433	MROB_9082	99.30	284	2	0	1	284	1	284	0	582
ESALQ_1434	MROB_9081	98.59	426	6	0	1	426	1	426	0	863
ESALQ_1435	MROB_9080	94.47	561	6	1	1	561	1	536	0	980
ESALQ_1436	MROB_9079	98.60	356	5	0	1	356	1	356	0	716
ESALQ_1437	MROB_9078	96.43	280	10	0	1	280	1	280	0	547
ESALQ_1438	MROB_9077	97.43	584	6	1	1	575	1	584	0	1158
ESALQ_1439	MROB_9076	95.77	568	7	1	1	551	1	568	0	1122
ESALQ_1440	MROB_9075	98.37	306	5	0	1	306	1	306	0	617
ESALQ_1441	MROB_9074	95.83	552	17	1	1	546	1	552	0	1000
ESALQ_1442	MROB_9073	99.78	457	1	0	175	631	1	457	0	954
ESALQ_1443	MROB_9072	100.00	258	0	0	1	258	1	258	0	514
ESALQ_1444	MROB_9071	99.47	379	2	0	1	379	1	379	0	776
ESALQ_1445	MROB_9070	96.69	363	12	0	1	363	1	363	0	692
ESALQ_1446	MROB_9069	99.33	601	4	0	1	601	134	734	0	1238
ESALQ_1447	MROB_9068	97.97	885	18	0	1	885	1	885	0	1782
ESALQ_1448	MROB_9067	97.42	736	15	2	1	735	1	733	0	1390
ESALQ_1449	MROB_9066	99.06	1166	11	0	1	1166	1	1166	0	2378
ESALQ_1450	MROB_9065	98.47	326	5	0	1	326	1	326	0	662
ESALQ_1451	MROB_9064	99.53	640	1	1	1	640	1	638	0	1215
ESALQ_1452	MROB_9063	99.38	324	2	0	1	324	1	324	0	676
ESALQ_1453	MROB_9062	97.78	405	7	1	1	403	1	405	0	759
ESALQ_1454	MROB_9061	99.28	558	1	1	1	555	1	558	0	1124
ESALQ_1455	MROB_9060	99.60	506	2	0	1	506	1	506	0	1027
ESALQ_1456	MROB_9059	99.42	1208	7	0	1	1208	1	1208	0	2509
ESALQ_1457	MROB_9058	98.90	364	2	1	1	364	1	362	0	701
ESALQ_1460	MROB_9055	95.87	363	15	0	1	363	1	363	0	642
ESALQ_1462	MROB_9053	98.74	478	6	0	15	492	1	478	0	970
ESALQ_1463	MROB_9052	99.83	595	1	0	1	595	1	595	0	1244
ESALQ_1464	MROB_9051	96.53	662	23	0	1	662	1	662	0	1309
ESALQ_1465	MROB_9050	100.00	844	0	0	1	844	1	844	0	1733
ESALQ_1466	MROB_9049	99.18	3174	26	0	1	3174	1	3174	0	6502
ESALQ_1467	MROB_9048	99.48	573	3	0	1	573	1	573	0	1162
ESALQ_1468	MROB_9046	96.30	676	21	2	1	673	1	675	0	1333
ESALQ_1469	MROB_9045	96.90	1323	17	1	1	1299	1	1323	0	2652
ESALQ_1470	MROB_9044	97.54	1059	6	1	1	1039	1	1059	0	2105
ESALQ_1471	MROB_9043	100.00	381	0	0	1	381	1	381	0	780
ESALQ_1472	MROB_9042	97.16	317	9	0	50	366	1	317	0	639
ESALQ_1473	MROB_9041	97.70	304	7	0	1	304	1	304	0	603
ESALQ_1476	MROB_9038	98.81	419	5	0	1	419	180	598	0	864
ESALQ_1477	MROB_9037	92.25	555	43	0	1	555	1	555	0	1030
ESALQ_1478	MROB_9036	99.07	537	5	0	1	537	1	537	0	1101
ESALQ_1480	MROB_9034	98.76	645	8	0	1	645	1	645	0	1315
ESALQ_1483	MROB_9030	97.62	505	12	0	1	505	1	505	0	1029
ESALQ_1484	MROB_9029	93.67	600	37	1	1	599	1	600	0	1115
ESALQ_1485	MROB_9028	98.83	342	4	0	1	342	1	342	0	701
ESALQ_1486	MROB_9027	93.82	259	11	1	1	259	1	254	0	500
ESALQ_1488	MROB_9025	97.67	430	10	0	1	430	1	430	0	847
ESALQ_1489	MROB_9024	99.20	377	3	0	1	377	53	429	0	781
ESALQ_1490	MROB_7206	68.65	421	131	1	42	461	20	440	0	613
ESALQ_1492	MROB_9021	97.92	432	9	0	1	432	1	432	0	876
ESALQ_1493	MROB_9020	98.96	386	4	0	1	386	1	386	0	783
ESALQ_1494	MROB_9019	98.83	1537	17	1	1	1537	1	1536	0	3098
ESALQ_1496	MROB_9016	97.60	584	14	0	1	584	1	584	0	1184
ESALQ_1504	MROB_9008	98.07	414	8	0	1	414	1	414	0	826
ESALQ_1505	MROB_9007	91.11	371	33	0	1	371	1	371	0	681
ESALQ_1507	MROB_9006	97.93	579	12	0	1	579	1	579	0	1165
ESALQ_1508	MROB_9004	98.95	570	6	0	1	570	1	570	0	1150
ESALQ_1509	MROB_9003	99.37	475	3	0	1	475	1	475	0	976
ESALQ_1511	MROB_9001	100.00	291	0	0	1	291	1	291	0	595
ESALQ_1512	MROB_9000	99.80	1000	2	0	1	1000	1	1000	0	2055
ESALQ_1513	MROB_8998	97.61	418	10	0	1	418	1	418	0	829
ESALQ_1514	MROB_8997	100.00	491	0	0	1	491	1	491	0	1022
ESALQ_1515	MROB_8996	99.05	734	7	0	1	734	1	734	0	1499
ESALQ_1516	MROB_8995	99.80	492	1	0	1	492	1	492	0	1013
ESALQ_1517	MROB_8993	98.85	868	10	0	1	868	1	868	0	1772
ESALQ_1518	MROB_8992	99.28	1383	10	0	60	1442	128	1510	0	2844
ESALQ_1519	MROB_8991	99.44	357	2	0	1	357	1	357	0	740
ESALQ_1521	MROB_8989	98.65	666	9	0	1	666	1	666	0	1314
ESALQ_1523	MROB_8987	96.59	381	4	1	1	372	1	381	0	749
ESALQ_1524	MROB_8986	95.16	827	40	0	1	827	59	885	0	1613
ESALQ_1527	MROB_8983	99.67	1522	4	1	1	1521	1	1522	0	3147
ESALQ_1528	MROB_8982	96.50	400	13	1	1	400	1	399	0	791
ESALQ_1531	MROB_8979	96.28	484	18	0	1	484	1	484	0	964
ESALQ_1532	MROB_8978	99.00	402	4	0	1	402	1	402	0	820
ESALQ_1533	MROB_8977	97.71	262	6	0	1	262	1	262	0	513
ESALQ_1536	MROB_8974	98.47	589	5	1	1	589	1	585	0	1196
ESALQ_1537	MROB_8973	99.72	360	1	0	1	360	1	360	0	749
ESALQ_1538	MROB_8972	99.54	646	3	0	1	646	1	646	0	1337
ESALQ_1539	MROB_8972	99.05	632	6	0	1	632	751	1382	0	1248
ESALQ_1540	MROB_8971	92.89	605	11	2	1	604	1	574	0	1110
ESALQ_1541	MROB_8970	98.40	438	7	0	1	438	92	529	0	887
ESALQ_1543	MROB_8968	99.41	1859	11	0	1	1859	1	1859	0	3801
ESALQ_1544	MROB_8967	99.76	2110	5	0	1	2110	1	2110	0	4365
ESALQ_1545	MROB_8966	98.13	482	9	0	1	482	1	482	0	983
ESALQ_1546	MROB_8965	97.62	378	9	0	1	378	1	378	0	731
ESALQ_1547	MROB_8964	98.14	861	14	2	117	975	154	1014	0	1740
ESALQ_1549	MROB_8963	99.00	896	9	0	1	896	1	896	0	1859
ESALQ_1550	MROB_8962	98.15	486	9	0	4	489	40	525	0	951
ESALQ_1551	MROB_8961	97.55	939	23	0	1	939	1	939	0	1892
ESALQ_1552	MROB_8960	99.57	470	2	0	1	470	1	470	0	977
ESALQ_1553	MROB_8959	98.66	971	4	1	1	971	1	962	0	1957
ESALQ_1554	MROB_8958	99.54	878	4	0	1	878	1	878	0	1831
ESALQ_1556	MROB_8956	98.39	436	7	0	1	436	1	436	0	890
ESALQ_1557	MROB_8955	98.58	423	6	0	1	423	1	423	0	861
ESALQ_1558	MROB_8954	99.56	913	4	0	1	913	1	913	0	1892
ESALQ_1559	MROB_8953	99.18	1091	9	0	1	1091	1	1091	0	2258
ESALQ_1560	MROB_8952	99.81	532	1	0	1	532	1	532	0	1083
ESALQ_1562	MROB_8950	99.49	392	2	0	1	392	1	392	0	797
ESALQ_1563	MROB_8949	99.12	800	7	0	1	800	1	800	0	1596
ESALQ_1564	MROB_8948	98.97	388	4	0	1	388	1	388	0	656
ESALQ_1565	MROB_8947	99.50	603	3	0	16	618	1	603	0	1222
ESALQ_1566	MROB_8946	98.99	297	3	0	1	297	1	297	0	603
ESALQ_1568	MROB_8944	98.41	504	8	0	1	504	1	504	0	1044
ESALQ_1569	MROB_8943	95.77	307	11	1	93	399	62	366	0	558
ESALQ_1570	MROB_8942	99.03	1138	11	0	1	1138	1	1138	0	2334
ESALQ_1571	MROB_8941	99.95	1858	1	0	1	1858	1	1858	0	3834
ESALQ_1572	MROB_8940	99.89	1784	2	0	1	1784	1	1784	0	3717
ESALQ_1573	MROB_8939	89.78	538	21	2	32	535	5	542	0	942
ESALQ_1574	MROB_8938	100.00	535	0	0	1	535	1	535	0	1121
ESALQ_1576	MROB_8937	100.00	286	0	0	1	286	1	286	0	572
ESALQ_1577	MROB_8935	99.64	278	1	0	1	278	1	278	0	583
ESALQ_1579	MROB_8933	99.41	674	4	0	1	674	1	674	0	1383
ESALQ_1580	MROB_8932	99.07	430	4	0	1	430	1	430	0	876
ESALQ_1581	MROB_8931	99.10	1340	12	0	1	1340	1	1340	0	2729
ESALQ_1582	MROB_8930	97.78	1079	24	0	1	1079	1	1079	0	1807
ESALQ_1583	MROB_8929	99.72	722	2	0	1	722	1	722	0	1472
ESALQ_1584	MROB_8928	100.00	636	0	0	1	636	1	636	0	1333
ESALQ_1585	MROB_8927	99.37	1103	7	0	1	1103	1	1103	0	2255
ESALQ_1586	MROB_8926	99.22	892	7	0	1	892	1	892	0	1837
ESALQ_1587	MROB_8925	99.84	1869	3	0	1	1869	1	1869	0	3832
ESALQ_1588	MROB_8924	96.14	726	10	1	1	726	1	708	0	1432
ESALQ_1589	MROB_8923	100.00	304	0	0	1	304	1	304	0	621
ESALQ_1590	MROB_8922	99.67	307	1	0	1	307	1	307	0	625
ESALQ_1592	MROB_8921	99.02	611	6	0	1	611	1	611	0	1222
ESALQ_1593	MROB_8920	100.00	893	0	0	1	893	1	893	0	1866
ESALQ_1594	MROB_8919	99.69	647	2	0	1	647	1	647	0	1331
ESALQ_1595	MROB_8918	99.14	347	3	0	1	347	33	379	0	712
ESALQ_1596	MROB_8917	98.79	413	5	0	1	413	1	413	0	838
ESALQ_1597	MROB_8916	100.00	448	0	0	1	448	1	448	0	927
ESALQ_1598	MROB_8915	100.00	477	0	0	1	477	1	477	0	983
ESALQ_1599	MROB_3173	99.42	342	2	0	1	342	1	342	0	696
ESALQ_1600	MROB_3172	99.64	1115	4	0	1	1115	1	1115	0	2290
ESALQ_1602	MROB_3171	91.90	469	2	1	1	433	1	469	0	871
ESALQ_1603	MROB_3170	99.71	347	1	0	1	347	1	347	0	694
ESALQ_1604	MROB_3169	99.86	706	1	0	1	706	1	706	0	1478
ESALQ_1605	MROB_3168	99.68	622	2	0	1	622	1	622	0	1293
ESALQ_1606	MROB_3167	98.28	522	9	0	1	522	1	522	0	1040
ESALQ_1607	MROB_3166	99.74	388	1	0	1	388	1	388	0	798
ESALQ_1608	MROB_3165	99.68	927	3	0	1	927	1	927	0	1907
ESALQ_1609	MROB_3164	99.04	520	5	0	2	521	48	567	0	1066
ESALQ_1610	MROB_3163	99.42	691	4	0	1	691	1	691	0	1409
ESALQ_1611	MROB_3162	97.19	1175	12	1	1	1175	1	1154	0	2366
ESALQ_1612	MROB_3161	99.70	336	1	0	1	336	1	336	0	688
ESALQ_1613	MROB_3160	99.65	1130	4	0	290	1419	1	1130	0	2306
ESALQ_1614	MROB_3159	99.49	1570	8	0	1	1570	1	1570	0	3195
ESALQ_1615	MROB_3158	100.00	631	0	0	1	631	1	631	0	1306
ESALQ_1618	MROB_3155	95.10	510	7	1	1	492	1	510	0	989
ESALQ_1619	MROB_3154	99.20	873	7	0	1	873	1	873	0	1804
ESALQ_1620	MROB_3153	100.00	716	0	0	1	716	1	716	0	1491
ESALQ_1621	MROB_3152	99.57	696	3	0	1	696	1	696	0	1437
ESALQ_1622	MROB_3151	100.00	331	0	0	1	331	1	331	0	672
ESALQ_1623	MROB_3150	99.30	999	7	0	1	999	1	999	0	2073
ESALQ_1624	MROB_3150	94.46	686	19	1	8	693	1069	1735	0	1330
ESALQ_1625	MROB_3149	100.00	269	0	0	1	269	1	269	0	554
ESALQ_1626	MROB_3148	99.05	1058	9	1	1	1058	1	1057	0	2164
ESALQ_1627	MROB_3147	99.54	649	3	0	1	649	1	649	0	1351
ESALQ_1628	MROB_3146	88.79	473	12	1	1	473	1	432	0	860
ESALQ_1629	MROB_3145	98.03	406	8	0	1	406	1	406	0	820
ESALQ_1630	MROB_3144	96.32	1033	18	1	1	1013	1	1033	0	2028
ESALQ_1631	MROB_3143	100.00	1049	0	0	1	1049	1	1049	0	2201
ESALQ_1632	MROB_3142	99.85	650	1	0	1	650	1	650	0	1342
ESALQ_1633	MROB_3141	99.01	1012	10	0	1	1012	1	1012	0	2067
ESALQ_1634	MROB_3140	96.23	504	19	0	1	504	1	504	0	1008
ESALQ_1635	MROB_3139	100.00	517	0	0	1	517	1	517	0	1042
ESALQ_1636	MROB_3138	99.71	697	2	0	1	697	1	697	0	1456
ESALQ_1637	MROB_3137	96.94	523	1	1	1	523	1	508	0	1036
ESALQ_1639	MROB_3135	99.80	496	1	0	1	496	1	496	0	1032
ESALQ_1640	MROB_3134	98.25	2170	38	0	1	2170	1	2170	0	4423
ESALQ_1641	MROB_3133	98.01	503	10	0	1	503	1	503	0	988
ESALQ_1642	MROB_3132	99.80	504	1	0	1	504	1	504	0	1033
ESALQ_1643	MROB_3131	99.20	622	1	1	1	618	1	622	0	1189
ESALQ_1644	MROB_3130	99.71	680	2	0	1	680	1	680	0	1409
ESALQ_1645	MROB_3129	98.52	741	11	0	1	741	1	741	0	1498
ESALQ_1646	MROB_3128	99.70	337	1	0	1	337	1	337	0	643
ESALQ_1647	MROB_3127	99.60	741	3	0	1	741	1	741	0	1547
ESALQ_1648	MROB_3126	99.76	414	1	0	1	414	1	414	0	852
ESALQ_1649	MROB_3125	99.68	311	1	0	1	311	1	311	0	640
ESALQ_1651	MROB_3122	98.57	350	5	0	1	350	1	350	0	706
ESALQ_1653	MROB_3121	86.78	416	54	1	1	415	1	416	0	607
ESALQ_1654	MROB_3120	94.17	823	47	1	1	822	1	823	0	1587
ESALQ_1655	MROB_3119	96.97	495	15	0	87	581	170	664	0	975
ESALQ_1656	MROB_3118	98.17	1800	33	0	1	1800	1	1800	0	3660
ESALQ_1657	MROB_3117	99.83	576	1	0	1	576	1	576	0	1197
ESALQ_1658	MROB_3116	99.35	463	3	0	1	463	1	463	0	949
ESALQ_1659	MROB_3115	98.81	421	5	0	1	421	1	421	0	868
ESALQ_1660	MROB_3114	98.96	1351	14	0	1	1351	1	1351	0	2727
ESALQ_1661	MROB_3113	99.50	991	5	0	19	1009	9	999	0	2022
ESALQ_1662	MROB_3112	99.43	1059	6	0	1	1059	1	1059	0	2181
ESALQ_1664	MROB_3110	99.75	792	2	0	1	792	1	792	0	1570
ESALQ_1666	MROB_3109	100.00	415	0	0	201	615	186	600	0	845
ESALQ_1668	MROB_3107	91.15	407	0	1	153	559	5	375	0	757
ESALQ_1669	MROB_3106	98.67	450	6	0	1	450	1	450	0	919
ESALQ_1670	MROB_3105	99.67	304	1	0	1	304	1	304	0	630
ESALQ_1671	MROB_3104	96.52	603	2	1	62	664	64	647	0	1146
ESALQ_1672	MROB_3103	99.20	996	8	0	1	996	143	1138	0	2026
ESALQ_1673	MROB_3102	99.27	275	2	0	1	275	1	275	0	541
ESALQ_1676	MROB_3099	97.54	407	10	0	91	497	1	407	0	805
ESALQ_1678	MROB_3097	99.39	653	4	0	1	653	1	653	0	1343
ESALQ_1679	MROB_3096	98.50	800	12	0	1	800	1	800	0	1593
ESALQ_1680	MROB_3095	99.63	534	2	0	1	534	1	534	0	1089
ESALQ_1681	MROB_3094	99.08	653	6	0	1	653	1	653	0	1328
ESALQ_1683	MROB_3092	94.15	496	6	2	1	474	1	495	0	940
ESALQ_1686	MROB_3089	99.73	372	1	0	1	372	1	372	0	722
ESALQ_1687	MROB_3088	97.37	1295	34	0	1	1295	1	1295	0	2627
ESALQ_1688	MROB_3087	99.50	1001	5	0	184	1184	1	1001	0	2016
ESALQ_1689	MROB_3086	96.83	252	8	0	1	252	1	252	0	501
ESALQ_1690	MROB_3085	98.15	325	6	0	1	325	1	325	0	648
ESALQ_1691	MROB_3084	99.05	634	1	1	1	629	1	634	0	1275
ESALQ_1692	MROB_3083	98.18	1211	19	1	1	1211	1	1208	0	2402
ESALQ_1694	MROB_3081	97.10	414	12	0	1	414	1	414	0	829
ESALQ_1695	MROB_3080	99.85	648	1	0	1	648	1	648	0	1335
ESALQ_1697	MROB_3079	96.50	515	18	0	1	515	1	515	0	1026
ESALQ_1698	MROB_3078	98.01	553	4	1	1	546	1	553	0	1104
ESALQ_1699	MROB_3077	98.96	479	5	0	1	479	1	479	0	982
ESALQ_1700	MROB_3076	99.27	550	4	0	1	550	1	550	0	1126
ESALQ_1701	MROB_3075	99.11	674	5	1	1	674	1	673	0	1360
ESALQ_1702	MROB_3074	92.33	287	18	1	1	283	1	287	0	523
ESALQ_1704	MROB_3072	93.94	330	14	2	1	328	1	326	0	558
ESALQ_1706	MROB_3070	98.90	364	4	0	1	364	1	364	0	717
ESALQ_1707	MROB_3069	99.45	541	3	0	1	541	1	541	0	1047
ESALQ_1708	MROB_3068	98.86	352	4	0	1	352	1	352	0	716
ESALQ_1709	MROB_3067	99.04	417	4	0	1	417	1	417	0	864
ESALQ_1711	MROB_3065	96.42	335	12	0	1	335	1	335	0	670
ESALQ_1712	MROB_3064	95.01	521	26	0	1	521	1	521	0	951
ESALQ_1713	MROB_10418	77.43	381	76	7	1	379	1	373	0	573
ESALQ_1717	MROB_6279	75.70	391	91	2	25	413	1	389	0	577
ESALQ_1718	MROB_3063	98.89	541	6	0	1	541	1	541	0	1098
ESALQ_1719	MROB_3062	100.00	256	0	0	1	256	1	256	0	527
ESALQ_1720	MROB_3061	98.92	370	4	0	1	370	1	370	0	758
ESALQ_1721	MROB_3060	100.00	278	0	0	1	278	1	278	0	564
ESALQ_1722	MROB_3059	98.52	813	12	0	1	813	1	813	0	1667
ESALQ_1723	MROB_3058	98.91	552	6	0	1	552	1	552	0	1136
ESALQ_1725	MROB_3056	99.20	249	2	0	1	249	1	249	0	508
ESALQ_1726	MROB_3055	98.96	1447	15	0	1	1447	1	1447	0	2985
ESALQ_1727	MROB_3053	99.62	260	1	0	17	276	121	380	0	528
ESALQ_1728	MROB_3052	99.70	334	1	0	1	334	1	334	0	686
ESALQ_1729	MROB_3051	100.00	313	0	0	1	313	1	313	0	653
ESALQ_1730	MROB_3050	97.70	566	13	0	1	566	140	705	0	1129
ESALQ_1731	MROB_3049	98.37	615	9	1	1	615	1	614	0	1166
ESALQ_1732	MROB_3048	99.22	255	2	0	1	255	1	255	0	517
ESALQ_1735	MROB_3045	100.00	439	0	0	1	439	1	439	0	916
ESALQ_1736	MROB_3044	98.84	431	5	0	1	431	1	431	0	879
ESALQ_1737	MROB_3043	99.87	774	1	0	1	774	1	774	0	1596
ESALQ_1738	MROB_3042	100.00	529	0	0	1	529	1	529	0	1103
ESALQ_1739	MROB_3041	99.57	467	2	0	1	467	1	467	0	962
ESALQ_1740	MROB_3040	98.37	369	6	0	25	393	131	499	0	743
ESALQ_1741	MROB_3039	98.99	296	3	0	1	296	1	296	0	611
ESALQ_1742	MROB_3038	98.82	934	7	1	1	934	1	930	0	1823
ESALQ_1743	MROB_3037	98.77	407	4	1	1	407	5	410	0	800
ESALQ_1744	MROB_3036	99.51	618	3	0	1	618	1	618	0	1271
ESALQ_1745	MROB_3035	98.24	398	7	0	1	398	1	398	0	793
ESALQ_1746	MROB_3034	99.57	465	2	0	1	465	1	465	0	947
ESALQ_1747	MROB_3033	99.09	1323	10	1	1	1323	1	1321	0	2594
ESALQ_1748	MROB_3032	86.68	533	58	4	1	525	1	528	0	832
ESALQ_1750	MROB_3030	93.70	571	36	0	1	571	1	571	0	961
ESALQ_1752	MROB_3028	97.91	526	11	0	1	526	1	526	0	1068
ESALQ_1754	MROB_3025	97.78	451	10	0	1	451	1	451	0	923
ESALQ_1756	MROB_3022	99.38	486	3	0	1	486	1	486	0	993
ESALQ_1757	MROB_3021	99.55	672	0	2	1	670	1	671	0	1384
ESALQ_1758	MROB_3020	99.41	1190	7	0	1	1190	1	1190	0	2415
ESALQ_1759	MROB_3019	97.75	621	14	0	1	621	1	621	0	1271
ESALQ_1760	MROB_3018	90.78	293	4	1	1	270	1	293	0	535
ESALQ_1761	MROB_3017	99.25	932	7	0	1	932	1	932	0	1873
ESALQ_1762	MROB_3016	97.76	536	12	0	1	536	1	536	0	1037
ESALQ_1763	MROB_3015	97.93	629	13	0	1	629	1	629	0	1297
ESALQ_1768	MROB_3011	98.23	452	4	1	1	448	1	452	0	907
ESALQ_1771	MROB_3005	92.41	369	4	1	1	369	1	345	0	676
ESALQ_1772	MROB_3004	96.11	1131	29	3	1	1119	1	1128	0	2064
ESALQ_1774	MROB_3002	98.95	572	6	0	1	572	1	572	0	1157
ESALQ_1775	MROB_3001	99.41	1357	8	0	1	1357	1	1357	0	2805
ESALQ_1776	MROB_3000	85.16	546	47	4	1	535	1	523	0	929
ESALQ_1777	MROB_2999	98.12	425	8	0	1	425	1	425	0	865
ESALQ_1778	MROB_2998	94.13	375	22	0	1	375	1	375	0	728
ESALQ_1779	MROB_2997	100.00	391	0	0	1	391	1	391	0	798
ESALQ_1780	MROB_2996	93.28	491	4	1	1	462	1	491	0	931
ESALQ_1781	MROB_2995	100.00	271	0	0	1	271	1	271	0	564
ESALQ_1782	MROB_2994	96.11	796	19	1	18	813	41	824	0	1566
ESALQ_1783	MROB_2993	99.26	406	3	0	1	406	1	406	0	845
ESALQ_1784	MROB_2992	99.25	533	4	0	1	533	1	533	0	1105
ESALQ_1785	MROB_2991	98.14	323	6	0	62	384	1	323	0	656
ESALQ_1791	MROB_2987	99.00	1507	15	0	1	1507	1	1507	0	3066
ESALQ_1792	MROB_2986	98.91	274	3	0	1	274	1	274	0	558
ESALQ_1793	MROB_2985	99.52	419	2	0	109	527	1	419	0	870
ESALQ_1794	MROB_2984	99.78	453	1	0	1	453	1	453	0	934
ESALQ_1795	MROB_2983	95.59	839	37	0	1	839	1	839	0	1628
ESALQ_1796	MROB_2982	98.65	591	5	1	1	591	1	588	0	1233
ESALQ_1797	MROB_2981	99.34	455	3	0	17	471	26	480	0	939
ESALQ_1798	MROB_2980	99.81	513	1	0	1	513	1	513	0	1063
ESALQ_1799	MROB_2979	97.65	510	12	0	1	510	1	510	0	1009
ESALQ_1800	MROB_2978	92.94	510	15	2	1	510	1	489	0	952
ESALQ_1801	MROB_2977	98.44	641	10	0	1	641	1	641	0	1313
ESALQ_1803	MROB_2975	99.64	560	2	0	1	560	1	560	0	1142
ESALQ_1804	MROB_2974	98.06	464	9	0	1	464	1	464	0	949
ESALQ_1805	MROB_2973	100.00	270	0	0	1	270	1	270	0	557
ESALQ_1806	MROB_2972	99.15	589	5	0	1	589	1	589	0	1185
ESALQ_1807	MROB_2971	98.45	1609	25	0	1	1609	1	1609	0	3290
ESALQ_1808	MROB_2970	97.06	477	13	1	1	477	1	476	0	944
ESALQ_1809	MROB_2969	98.85	347	4	0	3	349	1	347	0	702
ESALQ_1810	MROB_2968	98.47	589	8	1	1	588	1	589	0	1174
ESALQ_1812	MROB_2966	98.14	323	6	0	1	323	1	323	0	579
ESALQ_1813	MROB_2965	95.92	735	22	3	287	1019	12	740	0	1368
ESALQ_1814	MROB_2963	99.60	252	1	0	1	252	89	340	0	512
ESALQ_1815	MROB_2961	99.10	442	4	0	4	445	30	471	0	906
ESALQ_1821	MROB_2954	100.00	1004	0	0	1	1004	1	1004	0	2078
ESALQ_1823	MROB_2953	99.40	1008	6	0	1	1008	1	1008	0	2065
ESALQ_1825	MROB_2951	98.40	1065	17	0	1	1065	1	1065	0	2139
ESALQ_1826	MROB_2950	97.04	371	11	0	7	377	1	371	0	749
ESALQ_1827	MROB_2949	98.91	366	4	0	1	366	1	366	0	758
ESALQ_1828	MROB_2948	97.83	552	10	2	1	551	1	551	0	1102
ESALQ_1829	MROB_2947	97.18	567	9	1	1	560	1	567	0	1103
ESALQ_1830	MROB_2946	99.77	881	2	0	1	881	189	1069	0	1819
ESALQ_1831	MROB_2945	98.98	2457	23	2	297	2751	291	2747	0	5032
ESALQ_1833	MROB_2943	99.61	1021	4	0	1	1021	1	1021	0	2047
ESALQ_1834	MROB_2942	97.89	804	17	0	1	804	1	804	0	1582
ESALQ_1835	MROB_2941	99.10	887	8	0	1	887	1	887	0	1778
ESALQ_1836	MROB_2940	99.66	3207	11	0	1	3207	1	3207	0	6544
ESALQ_1837	MROB_2939	99.25	666	5	0	1	666	1	666	0	1350
ESALQ_1839	MROB_2937	95.13	308	5	1	1	308	1	298	0	600
ESALQ_1840	MROB_2936	97.79	452	10	0	1	452	1	452	0	905
ESALQ_1841	MROB_2935	98.48	591	9	0	1	591	21	611	0	1212
ESALQ_1842	MROB_2934	98.67	600	8	0	1	600	1	600	0	1234
ESALQ_1843	MROB_2933	98.52	743	11	0	1	743	1	743	0	1499
ESALQ_1844	MROB_2932	99.75	786	2	0	1	786	1	786	0	1591
ESALQ_1845	MROB_2931	91.45	304	7	1	1	285	1	304	0	574
ESALQ_1846	MROB_2930	87.61	444	49	1	1	438	1	444	0	681
ESALQ_1848	MROB_2928	99.32	588	4	0	1	588	1	588	0	1206
ESALQ_1849	MROB_2927	98.49	529	8	0	1	529	1	529	0	1093
ESALQ_1850	MROB_2926	99.53	428	2	0	1	428	1	428	0	885
ESALQ_1853	MROB_2923	97.92	288	6	0	1	288	1	288	0	596
ESALQ_1854	MROB_2921	98.70	540	7	0	1	540	1	540	0	1110
ESALQ_1855	MROB_2920	100.00	601	0	0	6	606	3	603	0	1244
ESALQ_1856	MROB_2919	99.07	536	5	0	1	536	1	536	0	1097
ESALQ_1857	MROB_2918	99.10	558	5	0	1	558	1	558	0	1127
ESALQ_1858	MROB_2917	100.00	242	0	0	1	242	1	242	0	503
ESALQ_1859	MROB_2916	99.23	261	2	0	1	261	1	261	0	533
ESALQ_1860	MROB_2915	97.92	288	6	0	1	288	1	288	0	580
ESALQ_1861	MROB_2914	99.75	395	1	0	1	395	1	395	0	814
ESALQ_1862	MROB_2913	98.11	583	8	1	1	580	1	583	0	1156
ESALQ_1863	MROB_2912	97.17	283	8	0	1	283	1	283	0	570
ESALQ_1864	MROB_2911	98.95	287	3	0	1	287	1	287	0	582
ESALQ_1865	MROB_2910	94.01	284	4	1	1	284	1	271	0	549
ESALQ_1866	MROB_2909	96.04	303	12	0	1	303	1	303	0	592
ESALQ_1867	MROB_2908	99.84	621	1	0	1	621	1	621	0	1270
ESALQ_1869	MROB_2907	87.45	821	43	4	1	821	1	761	0	1431
ESALQ_1870	MROB_2906	99.52	413	2	0	1	413	1	413	0	847
ESALQ_1871	MROB_2905	94.65	299	11	1	423	716	486	784	0	566
ESALQ_1872	MROB_2904	86.81	455	48	2	1	445	1	453	0	516
ESALQ_1873	MROB_2903	98.77	567	7	0	1	567	1	567	0	1152
ESALQ_1875	MROB_2902	99.26	540	4	0	1	540	470	1009	0	1093
ESALQ_1876	MROB_2901	99.77	1314	3	0	1	1314	1	1314	0	2711
ESALQ_1877	MROB_2900	99.70	335	1	0	1	335	1	335	0	670
ESALQ_1878	MROB_2899	99.05	529	5	0	1	529	1	529	0	1080
ESALQ_1879	MROB_2897	99.61	518	2	0	1	518	1	518	0	1035
ESALQ_1881	MROB_2895	98.56	487	7	0	65	551	44	530	0	997
ESALQ_1882	MROB_2894	98.28	580	10	0	1	580	1	580	0	1187
ESALQ_1883	MROB_2893	97.35	491	13	0	1	491	1	491	0	993
ESALQ_1884	MROB_2892	99.33	593	4	0	1	593	1	593	0	1228
ESALQ_1885	MROB_2891	99.02	1429	14	0	1	1429	1	1429	0	2932
ESALQ_1886	MROB_2890	89.15	544	7	3	1	544	1	492	0	951
ESALQ_1888	MROB_2888	96.31	352	12	1	1	351	1	352	0	699
ESALQ_1889	MROB_2887	99.84	620	1	0	1	620	1	620	0	1244
ESALQ_1890	MROB_2886	96.28	323	12	0	1	323	1	323	0	641
ESALQ_1891	MROB_2885	98.83	257	3	0	1	257	1	257	0	518
ESALQ_1893	MROB_2883	98.65	591	8	0	1	591	1	591	0	1192
ESALQ_1894	MROB_2882	93.20	294	20	0	1	294	1	294	0	561
ESALQ_1895	MROB_2880	96.54	578	13	2	1	571	94	671	0	1134
ESALQ_1896	MROB_2879	94.60	278	15	0	1	278	1	278	0	542
ESALQ_1897	MROB_2878	99.70	329	0	1	1	328	1	329	0	597
ESALQ_1898	MROB_2877	99.82	1122	2	0	1	1122	1	1122	0	2313
ESALQ_1899	MROB_2876	98.43	318	5	0	1	318	1	318	0	644
ESALQ_1900	MROB_2875	99.04	416	4	0	1	416	1	416	0	844
ESALQ_1901	MROB_2874	98.18	987	18	0	1	987	1	987	0	2000
ESALQ_1902	MROB_2873	99.24	787	6	0	1	787	1	787	0	1589
ESALQ_1904	MROB_2871	96.89	257	8	0	1	257	1	257	0	519
ESALQ_1905	MROB_2870	95.59	1043	13	1	1	1010	1	1043	0	2026
ESALQ_1907	MROB_2868	99.11	337	3	0	1	337	1	337	0	661
ESALQ_1909	MROB_2866	99.12	565	5	0	3	567	6	570	0	1168
ESALQ_1910	MROB_2865	99.71	340	1	0	1	340	1	340	0	684
ESALQ_1911	MROB_2864	87.76	670	41	5	1	670	93	721	0	1184
ESALQ_1912	MROB_2863	99.82	1083	2	0	1	1083	1	1083	0	2254
ESALQ_1913	MROB_2862	100.00	298	0	0	1	298	1	298	0	607
ESALQ_1914	MROB_2861	97.32	299	8	0	1	299	1	299	0	598
ESALQ_1915	MROB_2860	99.28	278	2	0	1	278	1	278	0	569
ESALQ_1916	MROB_2859	96.58	643	1	1	1	622	1	643	0	1269
ESALQ_1917	MROB_2858	99.13	458	4	0	1	458	1	458	0	952
ESALQ_1918	MROB_2857	100.00	315	0	0	1	315	1	315	0	651
ESALQ_1919	MROB_2856	91.08	415	13	1	1	415	1	391	0	759
ESALQ_1920	MROB_2855	99.19	495	4	0	45	539	1	495	0	1007
ESALQ_1921	MROB_2854	97.22	862	5	1	1	862	1	843	0	1731
ESALQ_1923	MROB_2852	99.49	590	3	0	1	590	1	590	0	1190
ESALQ_1925	MROB_2850	98.96	1823	19	0	1	1823	1	1823	0	3704
ESALQ_1926	MROB_2849	94.92	354	18	0	1	354	1	354	0	701
ESALQ_1927	MROB_2848	99.21	505	4	0	1	505	19	523	0	1041
ESALQ_1929	MROB_2846	98.73	947	12	0	1	947	1	947	0	1937
ESALQ_1930	MROB_2845	96.95	361	10	1	1	361	1	360	0	716
ESALQ_1931	MROB_2844	98.54	684	10	0	1	684	1	684	0	1414
ESALQ_1934	MROB_2841	86.95	904	68	8	1	874	1	884	0	1503
ESALQ_1935	MROB_2840	99.78	897	2	0	1	897	1	897	0	1860
ESALQ_1936	MROB_2839	99.25	1200	9	0	1	1200	1	1200	0	2355
ESALQ_1937	MROB_2838	88.79	446	1	1	39	484	17	413	0	807
ESALQ_1938	MROB_2837	65.21	388	135	0	16	403	18	405	0	543
ESALQ_1941	MROB_2835	98.85	347	4	0	1	347	1	347	0	711
ESALQ_1943	MROB_2833	99.31	725	5	0	1	725	1	725	0	1491
ESALQ_1944	MROB_2832	100.00	423	0	0	1	423	1	423	0	855
ESALQ_1945	MROB_2831	98.63	802	11	0	1	802	1	802	0	1631
ESALQ_1946	MROB_2830	100.00	354	0	0	1	354	1	354	0	739
ESALQ_1947	MROB_2829	100.00	292	0	0	1	292	1	292	0	612
ESALQ_1948	MROB_2828	100.00	296	0	0	1	296	40	335	0	610
ESALQ_1950	MROB_2826	98.71	311	3	1	1	310	1	311	0	625
ESALQ_1951	MROB_2825	98.74	398	5	0	1	398	1	398	0	788
ESALQ_1952	MROB_2824	99.60	253	1	0	1	253	1	253	0	523
ESALQ_1955	MROB_2820	100.00	319	0	0	1	319	1	319	0	668
ESALQ_1957	MROB_2818	95.68	556	24	0	56	611	1	556	0	1086
ESALQ_1958	MROB_2817	99.36	466	3	0	1	466	1	466	0	960
ESALQ_1959	MROB_2816	96.61	1004	11	1	1	1004	1	981	0	1979
ESALQ_1960	MROB_2815	96.30	514	19	0	1	514	1	514	0	1007
ESALQ_1961	MROB_2814	96.66	359	12	0	1	359	1	359	0	709
ESALQ_1962	MROB_2813	96.42	447	6	1	1	447	1	437	0	892
ESALQ_1963	MROB_2812	86.42	405	8	1	1	405	1	358	0	702
ESALQ_1964	MROB_2811	98.50	867	13	0	1	867	1	867	0	1774
ESALQ_1965	MROB_2810	97.86	3875	83	0	1	3875	1	3875	0	7881
ESALQ_1966	MROB_2809	97.55	531	13	0	1	531	1	531	0	1085
ESALQ_1967	MROB_2808	97.83	554	12	0	1	554	1	554	0	1123
ESALQ_1968	MROB_2807	97.83	323	7	0	36	358	128	450	0	674
ESALQ_1969	MROB_2806	91.71	386	9	2	1	386	1	363	0	696
ESALQ_1970	MROB_2805	97.44	313	8	0	1	313	1	313	0	626
ESALQ_1971	MROB_2804	96.27	724	27	0	1	724	1	724	0	1385
ESALQ_1972	MROB_2803	99.45	550	3	0	1	550	1	550	0	1130
ESALQ_1973	MROB_2802	98.56	555	8	0	1	555	1	555	0	1102
ESALQ_1975	MROB_2800	96.25	293	11	0	1	293	1	293	0	572
ESALQ_1976	MROB_2799	97.44	547	14	0	1	547	1	547	0	1107
ESALQ_1977	MROB_2798	100.00	499	0	0	1	499	1	499	0	1033
ESALQ_1978	MROB_2797	99.11	447	4	0	1	447	1	447	0	917
ESALQ_1980	MROB_2795	96.58	468	16	0	1	468	1	468	0	896
ESALQ_1981	MROB_2794	99.17	1321	11	0	1	1321	1	1321	0	2612
ESALQ_1982	MROB_2793	97.94	340	6	1	1	340	1	339	0	689
ESALQ_1986	MROB_2789	99.23	259	2	0	1	259	1	259	0	526
ESALQ_1987	MROB_2788	95.24	925	20	1	1	925	1	901	0	1791
ESALQ_1990	MROB_2785	99.13	1033	9	0	1	1033	1	1033	0	2079
ESALQ_1991	MROB_2784	99.30	427	3	0	1	427	1	427	0	887
ESALQ_1994	MROB_2781	97.82	459	10	0	1	459	1	459	0	923
ESALQ_1995	MROB_2780	98.84	519	6	0	1	519	1	519	0	1056
ESALQ_1996	MROB_2779	80.05	386	17	3	1	386	1	326	0	614
ESALQ_2000	MROB_2776	92.00	650	45	2	1	649	1	644	0	1207
ESALQ_2001	MROB_2775	99.06	637	6	0	1	637	1	637	0	1310
ESALQ_2002	MROB_2774	99.86	1415	2	0	1	1415	1	1415	0	2920
ESALQ_2004	MROB_2772	99.26	1217	9	0	1	1217	1	1217	0	2468
ESALQ_2006	MROB_2770	99.88	811	1	0	1	811	1	811	0	1676
ESALQ_2007	MROB_2769	98.92	464	5	0	1	464	1	464	0	946
ESALQ_2009	MROB_2767	82.22	731	61	5	1	665	1	728	0	1133
ESALQ_2010	MROB_2766	99.70	329	1	0	1	329	1	329	0	677
ESALQ_2011	MROB_2765	99.06	319	3	0	1	319	17	335	0	651
ESALQ_2012	MROB_2764	99.09	1101	10	0	1	1101	1	1101	0	2247
ESALQ_2013	MROB_2763	97.13	279	8	0	1	279	1	279	0	550
ESALQ_2014	MROB_2762	97.69	520	12	0	1	520	1	520	0	1045
ESALQ_2016	MROB_2760	99.06	955	8	1	208	1162	1	954	0	1833
ESALQ_2020	MROB_2757	99.06	953	9	0	1	953	1	953	0	1924
ESALQ_2021	MROB_2756	100.00	643	0	0	11	653	9	651	0	1343
ESALQ_2022	MROB_2755	90.89	395	35	1	1	395	1	394	0	688
ESALQ_2023	MROB_2753	97.42	387	10	0	1	387	1	387	0	778
ESALQ_2024	MROB_2752	99.68	308	1	0	1	308	1	308	0	634
ESALQ_2025	MROB_2751	98.86	439	5	0	1	439	1	439	0	891
ESALQ_2026	MROB_2750	97.55	774	3	2	1	759	1	773	0	1537
ESALQ_2027	MROB_2749	99.55	1109	5	0	1	1109	1	1109	0	2286
ESALQ_2029	MROB_2748	99.05	1374	8	1	59	1432	2	1370	0	2794
ESALQ_2030	MROB_2747	99.92	1293	1	0	1	1293	1	1293	0	2641
ESALQ_2032	MROB_2745	99.59	493	2	0	1	493	1	493	0	1004
ESALQ_2033	MROB_2744	99.63	813	3	0	1	813	1	813	0	1650
ESALQ_2034	MROB_2743	99.26	947	7	0	1	947	1	947	0	1917
ESALQ_2035	MROB_2743	94.72	284	2	1	1	284	993	1263	0	554
ESALQ_2036	MROB_2742	98.91	1189	13	0	1	1189	1	1189	0	2369
ESALQ_2037	MROB_2740	98.04	408	7	1	1	408	1	407	0	810
ESALQ_2038	MROB_2739	93.84	601	15	2	1	597	13	595	0	1170
ESALQ_2039	MROB_2738	96.06	330	13	0	1	330	1	330	0	548
ESALQ_2040	MROB_2737	98.78	901	11	0	1	901	1	901	0	1824
ESALQ_2041	MROB_2736	99.39	330	2	0	1	330	1	330	0	671
ESALQ_2042	MROB_2735	98.90	724	8	0	1	724	156	879	0	1453
ESALQ_2043	MROB_2734	97.64	423	0	1	1	423	1	413	0	849
ESALQ_2044	MROB_2733	97.79	544	12	0	1	544	1	544	0	1098
ESALQ_2045	MROB_2732	100.00	272	0	0	1	272	1	272	0	552
ESALQ_2046	MROB_2731	97.65	1108	17	1	1	1108	1	1099	0	2220
ESALQ_2047	MROB_2730	99.47	1138	6	0	1	1138	1	1138	0	2374
ESALQ_2048	MROB_2729	99.52	419	2	0	1	419	1	419	0	867
ESALQ_2049	MROB_2728	99.46	1657	9	0	1	1657	1	1657	0	3401
ESALQ_2050	MROB_2727	98.62	435	6	0	1	435	1	435	0	896
ESALQ_2051	MROB_2726	99.36	472	3	0	1	472	1	472	0	974
ESALQ_2052	MROB_2725	99.38	485	3	0	1	485	1	485	0	989
ESALQ_2053	MROB_2724	97.67	344	4	1	1	340	69	412	0	667
ESALQ_2054	MROB_2723	83.57	347	29	1	1	319	1	347	0	565
ESALQ_2055	MROB_2722	98.49	728	11	0	1	728	1	728	0	1449
ESALQ_2056	MROB_2721	98.92	463	5	0	1	463	1	463	0	957
ESALQ_2057	MROB_2720	99.75	397	1	0	1	397	1	397	0	816
ESALQ_2058	MROB_2719	99.18	487	4	0	1	487	1	487	0	999
ESALQ_2059	MROB_2718	99.81	513	1	0	1	513	1	513	0	1044
ESALQ_2060	MROB_2717	92.43	436	32	1	1	436	1	435	0	686
ESALQ_2061	MROB_2716	99.03	724	7	0	1	724	1	724	0	1360
ESALQ_2063	MROB_2714	100.00	269	0	0	1	269	1	269	0	523
ESALQ_2064	MROB_2713	83.47	363	14	2	1	363	1	317	0	610
ESALQ_2065	MROB_2712	99.44	714	4	0	1	714	1	714	0	1431
ESALQ_2066	MROB_2711	97.86	1075	23	0	1	1075	1	1075	0	2144
ESALQ_2067	MROB_2710	96.20	500	19	0	1	500	1	500	0	961
ESALQ_2068	MROB_2709	96.45	310	10	1	1	310	1	309	0	607
ESALQ_2069	MROB_2708	99.40	334	2	0	1	334	1	334	0	683
ESALQ_2070	MROB_2707	99.67	907	3	0	1	907	1	907	0	1851
ESALQ_2071	MROB_2706	98.68	379	5	0	1	379	1	379	0	760
ESALQ_2072	MROB_2705	99.25	530	4	0	1	530	1	530	0	1065
ESALQ_2074	MROB_2704	98.54	824	12	0	1	824	1	824	0	1666
ESALQ_2075	MROB_2703	98.49	992	14	1	1	992	1	991	0	1986
ESALQ_2076	MROB_2702	99.00	698	6	1	1	697	1	698	0	1374
ESALQ_2077	MROB_2701	99.75	815	2	0	1	815	1	815	0	1694
ESALQ_2078	MROB_2700	99.61	254	1	0	1	254	1	254	0	518
ESALQ_2079	MROB_2699	96.35	466	8	1	1	466	1	457	0	918
ESALQ_2080	MROB_2698	98.79	1159	14	0	1	1159	1	1159	0	2367
ESALQ_2081	MROB_2697	85.19	513	3	2	1	513	1	440	0	874
ESALQ_2083	MROB_2695	99.02	712	7	0	1	712	1	712	0	1452
ESALQ_2087	MROB_2692	99.47	374	2	0	1	374	1	374	0	775
ESALQ_2088	MROB_2691	98.80	333	1	1	1	330	66	398	0	643
ESALQ_2089	MROB_2690	97.86	980	21	0	11	990	101	1080	0	1987
ESALQ_2090	MROB_2689	99.55	662	3	0	1	662	1	662	0	1359
ESALQ_2092	MROB_2688	99.74	382	1	0	1	382	1	382	0	792
ESALQ_2093	MROB_2687	97.84	370	8	0	1	370	1	370	0	748
ESALQ_2095	MROB_2686	99.35	1075	7	0	139	1213	251	1325	0	2212
ESALQ_2097	MROB_2685	97.02	974	22	3	1	972	1	969	0	1955
ESALQ_2098	MROB_2684	95.23	1110	24	1	1	1081	1	1110	0	2142
ESALQ_2099	MROB_2683	98.90	364	4	0	1	364	1	364	0	742
ESALQ_2100	MROB_2682	96.57	350	12	0	34	383	120	469	0	679
ESALQ_2102	MROB_2680	98.66	1496	19	1	1	1496	1	1495	0	3010
ESALQ_2103	MROB_2679	100.00	283	0	0	1	283	1	283	0	594
ESALQ_2104	MROB_2678	98.91	458	5	0	1	458	1056	1513	0	897
ESALQ_2105	MROB_2678	95.70	999	43	0	1	999	1	999	0	1858
ESALQ_2106	MROB_2677	99.34	455	3	0	1	455	1	455	0	937
ESALQ_2107	MROB_2676	94.27	419	24	0	1	419	1	419	0	762
ESALQ_2109	MROB_2673	97.98	643	13	0	1	643	1	643	0	1286
ESALQ_2114	MROB_2668	99.68	313	1	0	1	313	1	313	0	639
ESALQ_2115	MROB_2667	99.80	491	1	0	1	491	1	491	0	1015
ESALQ_2118	MROB_2664	98.19	554	9	1	1	553	1	554	0	1129
ESALQ_2119	MROB_2663	98.96	479	5	0	1	479	1	479	0	978
ESALQ_2120	MROB_2662	100.00	289	0	0	1	289	1	289	0	598
ESALQ_2121	MROB_2661	96.34	573	15	2	20	588	86	656	0	1118
ESALQ_2122	MROB_2660	97.52	483	12	0	1	483	41	523	0	971
ESALQ_2123	MROB_2659	94.84	465	5	1	1	465	1	446	0	908
ESALQ_2124	MROB_2658	99.51	2061	10	0	1	2061	1	2061	0	4195
ESALQ_2125	MROB_2657	98.93	280	3	0	1	280	1	280	0	570
ESALQ_2127	MROB_2655	94.95	495	15	1	1	495	1	485	0	910
ESALQ_2128	MROB_2654	100.00	264	0	0	157	420	1	264	0	553
ESALQ_2132	MROB_2650	99.71	1048	3	0	1	1048	1	1048	0	2175
ESALQ_2135	MROB_5245	85.27	923	51	5	1	881	1	880	0	1556
ESALQ_2137	MROB_5247	91.71	760	63	0	1	760	1	760	0	1425
ESALQ_2139	MROB_5252	98.65	296	4	0	1	296	1	296	0	604
ESALQ_2144	MROB_5255	99.46	932	5	0	1	932	1	932	0	1887
ESALQ_2147	MROB_5258	98.56	1315	14	2	1	1312	1	1313	0	2574
ESALQ_2148	MROB_5259	95.57	497	22	0	4	500	16	512	0	960
ESALQ_2149	MROB_5260	99.33	1046	7	0	1	1046	1	1046	0	2160
ESALQ_2151	MROB_5261	96.05	354	10	1	1	350	1	354	0	635
ESALQ_2153	MROB_5263	99.20	250	2	0	1	250	1	250	0	513
ESALQ_2154	MROB_5264	99.66	294	1	0	1	294	1	294	0	568
ESALQ_2155	MROB_5265	94.92	295	15	0	1	295	1	295	0	559
ESALQ_2156	MROB_5266	94.21	466	5	2	1	466	1	444	0	888
ESALQ_2157	MROB_5267	97.81	320	7	0	1	320	1	320	0	643
ESALQ_2159	MROB_5269	98.58	774	11	0	1	774	1	774	0	1555
ESALQ_2160	MROB_8761	64.22	408	146	0	57	464	4	411	0	520
ESALQ_2161	MROB_5271	98.76	728	9	0	1	728	1	728	0	1495
ESALQ_2162	MROB_5272	97.22	719	20	0	1	719	72	790	0	1449
ESALQ_2163	MROB_5273	99.68	309	1	0	1	309	1	309	0	632
ESALQ_2165	MROB_5275	99.36	779	5	0	1	779	1	779	0	1578
ESALQ_2167	MROB_5277	94.85	524	5	1	1	524	1	502	0	1019
ESALQ_2170	MROB_5280	98.06	309	6	0	1	309	1	309	0	632
ESALQ_2171	MROB_5281	98.61	502	7	0	1	502	1	502	0	1005
ESALQ_2172	MROB_5282	97.33	300	8	0	1	300	1	300	0	604
ESALQ_2176	MROB_5285	95.37	410	19	0	1	410	316	725	0	757
ESALQ_2178	MROB_5287	96.54	520	15	1	1	520	1	517	0	1027
ESALQ_2179	MROB_5288	93.68	2199	124	3	1	2197	1	2186	0	4211
ESALQ_2183	MROB_5292	98.80	499	6	0	1	499	1	499	0	1029
ESALQ_2184	MROB_5293	95.05	808	22	1	1	790	1	808	0	1577
ESALQ_2185	MROB_5294	95.16	455	22	0	1	455	1	455	0	880
ESALQ_2186	MROB_5295	97.68	691	16	0	1	691	1	691	0	1408
ESALQ_2187	MROB_5296	92.77	1466	106	0	7	1472	6	1471	0	2807
ESALQ_2190	MROB_10959	99.39	493	3	0	1	493	1	493	0	997
ESALQ_2191	MROB_10960	94.81	1099	43	2	1	1085	1	1099	0	2119
ESALQ_2192	MROB_10961	95.94	3447	123	1	1	3430	1	3447	0	6862
ESALQ_2193	MROB_10962	87.85	321	12	1	1	294	1	321	0	525
ESALQ_2194	MROB_10963	96.23	584	22	0	1	584	1	584	0	1169
ESALQ_2195	MROB_10964	99.39	329	2	0	1	329	1	329	0	660
ESALQ_2199	MROB_5299	98.60	783	11	0	1	783	1	783	0	1590
ESALQ_2200	MROB_5300	97.36	2881	76	0	1	2881	1	2881	0	5756
ESALQ_2202	MROB_5301	96.09	920	36	0	116	1035	1	920	0	1817
ESALQ_2203	MROB_5302	93.75	352	22	0	1	352	1	352	0	676
ESALQ_2204	MROB_5303	96.58	380	13	0	1	380	85	464	0	753
ESALQ_2205	MROB_5304	92.22	501	27	3	1	489	1	501	0	952
ESALQ_2208	MROB_5306	94.79	307	16	0	1	307	1	307	0	593
ESALQ_2209	MROB_5307	94.69	490	5	1	1	490	1	469	0	928
ESALQ_2210	MROB_5308	95.45	725	31	1	1	723	1	725	0	1415
ESALQ_2211	MROB_5309	99.87	756	1	0	1	756	1	756	0	1566
ESALQ_2213	MROB_5311	98.98	492	5	0	1	492	1	492	0	974
ESALQ_2214	MROB_5312	97.01	501	15	0	223	723	222	722	0	981
ESALQ_2215	MROB_5313	98.25	969	17	0	1	969	18	986	0	1949
ESALQ_2216	MROB_5314	92.56	712	26	1	17	701	86	797	0	1197
ESALQ_2217	MROB_5315	100.00	399	0	0	1	399	1	399	0	822
ESALQ_2218	MROB_5316	99.39	819	5	0	1	819	1	819	0	1701
ESALQ_2219	MROB_5317	98.71	389	5	0	1	389	1	389	0	797
ESALQ_2221	MROB_5319	99.06	424	4	0	1	424	1	424	0	869
ESALQ_2222	MROB_5321	95.69	348	15	0	1	348	1	348	0	693
ESALQ_2223	MROB_5322	98.83	341	4	0	1	341	29	369	0	693
ESALQ_2225	MROB_5324	98.31	296	4	1	10	304	2	297	0	562
ESALQ_2226	MROB_5325	99.66	290	1	0	1	290	1	290	0	584
ESALQ_2227	MROB_5326	99.67	909	3	0	1	909	1	909	0	1865
ESALQ_2228	MROB_5327	98.29	1052	18	0	1	1052	1	1052	0	2121
ESALQ_2229	MROB_5328	98.37	1469	5	1	1	1469	1	1450	0	2947
ESALQ_2230	MROB_5329	99.65	2892	10	0	1	2892	1	2892	0	5856
ESALQ_2232	MROB_5331	96.70	515	17	0	1	515	1	515	0	1021
ESALQ_2233	MROB_5332	98.46	845	13	0	1	845	1	845	0	1728
ESALQ_2234	MROB_5333	99.68	316	1	0	1	316	1	316	0	649
ESALQ_2235	MROB_5334	98.73	316	4	0	1	316	1	316	0	642
ESALQ_2236	MROB_5335	79.43	773	150	4	215	978	61	833	0	1217
ESALQ_2237	MROB_5336	98.93	374	4	0	1	374	1	374	0	755
ESALQ_2238	MROB_5337	99.82	556	0	1	1	555	1	556	0	1097
ESALQ_2241	MROB_5340	99.19	372	3	0	1	372	1	372	0	757
ESALQ_2243	MROB_5342	99.09	548	2	1	1	545	1	548	0	1123
ESALQ_2244	MROB_5343	99.71	687	2	0	1	687	452	1138	0	1398
ESALQ_2245	MROB_5343	98.06	361	7	0	1	361	1	361	0	748
ESALQ_2247	MROB_5345	96.80	406	13	0	1	406	1	406	0	811
ESALQ_2248	MROB_5346	97.97	394	8	0	1	394	1	394	0	798
ESALQ_2249	MROB_5346	99.39	980	6	0	1	980	482	1461	0	2014
ESALQ_2252	MROB_5349	96.91	550	13	1	1	546	1	550	0	1111
ESALQ_2253	MROB_5350	99.93	1447	1	0	1	1447	1	1447	0	3018
ESALQ_2254	MROB_5351	93.80	403	25	0	1	403	1	403	0	666
ESALQ_2258	MROB_5354	99.88	836	1	0	1	836	1	836	0	1731
ESALQ_2259	MROB_5355	100.00	635	0	0	1	635	1	635	0	1319
ESALQ_2260	MROB_5356	100.00	553	0	0	1	553	1	553	0	1141
ESALQ_2261	MROB_5357	99.25	398	3	0	1	398	1	398	0	811
ESALQ_2262	MROB_5358	98.61	432	6	0	1	432	1	432	0	889
ESALQ_2263	MROB_5359	99.01	707	7	0	1	707	1	707	0	1399
ESALQ_2265	MROB_5361	99.73	738	2	0	1	738	1	738	0	1488
ESALQ_2266	MROB_5362	99.65	283	1	0	1	283	1	283	0	528
ESALQ_2267	MROB_5363	96.35	1124	41	0	1	1124	1	1124	0	2248
ESALQ_2268	MROB_5365	95.83	408	17	0	1	408	1	408	0	800
ESALQ_2269	MROB_5366	89.72	360	3	2	1	328	1	358	0	644
ESALQ_2270	MROB_5367	78.04	683	126	3	6	665	1	682	0	1100
ESALQ_2271	MROB_5370	96.21	369	14	0	1	369	1	369	0	696
ESALQ_2273	MROB_5371	97.30	888	24	0	1	888	1	888	0	1793
ESALQ_2274	MROB_5372	96.53	317	6	1	1	317	1	312	0	622
ESALQ_2275	MROB_5373	98.02	354	7	0	1	354	1	354	0	718
ESALQ_2283	MROB_5380	98.15	379	7	0	1	379	1	379	0	768
ESALQ_2284	MROB_5381	95.60	637	24	1	1	637	1	633	0	1246
ESALQ_2286	MROB_5383	99.43	351	2	0	1	351	1	351	0	717
ESALQ_2287	MROB_5384	97.22	647	16	1	1	647	136	780	0	1298
ESALQ_2289	MROB_5385	99.85	680	1	0	1	680	1	680	0	1367
ESALQ_2290	MROB_5386	99.78	453	1	0	21	473	43	495	0	947
ESALQ_2291	MROB_5387	99.44	894	5	0	1	894	1	894	0	1827
ESALQ_2292	MROB_5389	98.01	1609	32	0	354	1962	1	1609	0	3212
ESALQ_2293	MROB_5390	88.75	1236	64	4	1	1168	1	1229	0	2004
ESALQ_2294	MROB_5391	97.06	272	6	1	1	272	1	270	0	504
ESALQ_2299	MROB_5396	99.34	912	6	0	1	912	77	988	0	1859
ESALQ_2301	MROB_5398	98.04	562	9	2	1	562	1	560	0	1087
ESALQ_2302	MROB_5399	97.91	383	7	1	1	382	1	383	0	746
ESALQ_2303	MROB_5400	98.80	333	4	0	1	333	1	333	0	690
ESALQ_2305	MROB_5402	98.42	633	10	0	1	633	126	758	0	1284
ESALQ_2306	MROB_5403	98.85	873	10	0	1	873	1	873	0	1790
ESALQ_2307	MROB_5404	98.79	745	9	0	1	745	1	745	0	1503
ESALQ_2308	MROB_5405	99.54	434	2	0	1	434	1	434	0	898
ESALQ_2309	MROB_5406	95.48	553	23	1	1	551	1	553	0	959
ESALQ_2311	MROB_5408	99.77	426	1	0	1	426	1	426	0	879
ESALQ_2313	MROB_5410	98.99	494	5	0	1	494	1	494	0	1009
ESALQ_2314	MROB_5411	99.79	476	1	0	1	476	1	476	0	983
ESALQ_2315	MROB_5412	99.39	495	3	0	1	495	1	495	0	987
ESALQ_2316	MROB_5413	99.33	449	3	0	1	449	1	449	0	927
ESALQ_2317	MROB_5415	95.74	517	13	1	1	517	1	508	0	1025
ESALQ_2318	MROB_5416	97.27	256	7	0	452	707	14	269	0	526
ESALQ_2319	MROB_5417	91.73	387	12	1	1	387	1	367	0	716
ESALQ_2321	MROB_5420	96.12	438	17	0	1	438	6	443	0	875
ESALQ_2322	MROB_5421	74.06	401	74	1	1	401	1	371	0	612
ESALQ_2324	MROB_5423	98.14	376	7	0	1	376	1	376	0	757
ESALQ_2325	MROB_5424	99.42	345	2	0	1	345	1	345	0	715
ESALQ_2326	MROB_5425	99.27	689	5	0	41	729	8	696	0	1407
ESALQ_2329	MROB_5428	99.01	304	3	0	1	304	1	304	0	617
ESALQ_2331	MROB_5431	99.64	1123	4	0	1	1123	1	1123	0	2326
ESALQ_2334	MROB_5434	100.00	709	0	0	1	709	1	709	0	1454
ESALQ_2336	MROB_5436	96.00	300	12	0	1	300	1	300	0	593
ESALQ_2337	MROB_5437	99.22	2055	10	4	1	2053	1	2051	0	4091
ESALQ_2338	MROB_5438	99.26	271	2	0	1	271	1	271	0	553
ESALQ_2341	MROB_5441	100.00	315	0	0	1	315	1	315	0	637
ESALQ_2346	MROB_5446	98.37	614	7	1	1	611	1	614	0	1153
ESALQ_2347	MROB_5447	100.00	497	0	0	1	497	1	497	0	983
ESALQ_2348	MROB_5448	99.23	909	7	0	1	909	1	909	0	1865
ESALQ_2350	MROB_5450	98.78	736	9	0	1	736	1	736	0	1470
ESALQ_2353	MROB_5453	98.42	443	7	0	1	443	1	443	0	901
ESALQ_2354	MROB_5454	99.70	337	1	0	1	337	1	337	0	701
ESALQ_2356	MROB_5456	99.37	476	3	0	1	476	1	476	0	976
ESALQ_2357	MROB_5457	99.59	489	2	0	1	489	1	489	0	997
ESALQ_2358	MROB_5458	99.85	661	1	0	1	661	1	661	0	1365
ESALQ_2360	MROB_5460	91.52	389	27	2	1	383	1	389	0	656
ESALQ_2363	MROB_5463	99.63	267	1	0	1	267	1	267	0	550
ESALQ_2364	MROB_5464	97.71	393	9	0	2	394	88	480	0	756
ESALQ_2366	MROB_5466	97.87	328	5	2	1	327	1	327	0	598
ESALQ_2368	MROB_5468	98.68	907	12	0	1	907	1	907	0	1790
ESALQ_2369	MROB_5469	99.03	513	5	0	1	513	1	513	0	1050
ESALQ_2371	MROB_5471	99.87	769	1	0	1	769	1	769	0	1595
ESALQ_2372	MROB_5472	98.47	783	12	0	1	783	1	783	0	1603
ESALQ_2373	MROB_5473	99.74	384	1	0	1	384	1	384	0	793
ESALQ_2374	MROB_5474	99.90	1016	1	0	1	1016	1	1016	0	2115
ESALQ_2375	MROB_5475	98.76	483	6	0	1	483	1	483	0	974
ESALQ_2376	MROB_5476	96.50	286	10	0	1	286	1	286	0	557
ESALQ_2377	MROB_5477	98.72	627	8	0	1	627	1	627	0	1268
ESALQ_2378	MROB_5478	99.49	395	2	0	1	395	1	395	0	795
ESALQ_2383	MROB_5483	99.76	840	2	0	1	840	1	840	0	1707
ESALQ_2384	MROB_5484	98.87	1769	20	0	1	1769	1	1769	0	3592
ESALQ_2385	MROB_5485	100.00	280	0	0	1	280	1	280	0	520
ESALQ_2386	MROB_5486	100.00	319	0	0	1	319	1	319	0	657
ESALQ_2387	MROB_5487	100.00	371	0	0	1	371	1	371	0	773
ESALQ_2388	MROB_5488	100.00	605	0	0	1	605	1	605	0	1089
ESALQ_2389	MROB_5489	99.71	349	1	0	1	349	76	424	0	723
ESALQ_2390	MROB_5490	98.36	427	7	0	1	427	1	427	0	861
ESALQ_2392	MROB_5491	99.02	305	2	1	46	350	185	488	0	626
ESALQ_2393	MROB_5492	98.09	470	9	0	1	470	1	470	0	964
ESALQ_2395	MROB_5494	98.84	345	4	0	1	345	66	410	0	705
ESALQ_2396	MROB_5495	99.10	1001	9	0	1	1001	1	1001	0	2025
ESALQ_2397	MROB_5496	97.44	429	11	0	1	429	1	429	0	771
ESALQ_2399	MROB_5498	99.11	560	5	0	1	560	1	560	0	1136
ESALQ_2400	MROB_5499	98.88	623	7	0	1	623	1	623	0	1266
ESALQ_2401	MROB_5720	99.35	766	5	0	1	766	1	766	0	1573
ESALQ_2402	MROB_5500	98.31	473	8	0	1	473	1	473	0	891
ESALQ_2403	MROB_5501	99.07	537	5	0	1	537	1	537	0	1103
ESALQ_2404	MROB_5502	74.62	398	41	4	1	339	1	397	0	560
ESALQ_2405	MROB_5503	99.46	368	1	1	1	368	1	367	0	667
ESALQ_2406	MROB_5504	99.23	259	0	1	1	257	1	259	0	505
ESALQ_2409	MROB_5507	96.54	318	11	0	17	334	17	334	0	580
ESALQ_2410	MROB_5508	99.43	1592	9	0	1	1592	1	1592	0	3226
ESALQ_2411	MROB_5509	97.70	739	16	1	1	739	1	738	0	1494
ESALQ_2414	MROB_5511	99.77	433	1	0	1	433	1	433	0	897
ESALQ_2415	MROB_5512	85.79	570	24	2	1	570	1	513	0	987
ESALQ_2416	MROB_5513	99.07	644	6	0	1	644	1	644	0	1311
ESALQ_2417	MROB_5514	98.03	254	5	0	1	254	1	254	0	523
ESALQ_2418	MROB_5515	98.83	858	10	0	1	858	1	858	0	1745
ESALQ_2420	MROB_5517	86.52	816	81	7	1	788	1	815	0	1418
ESALQ_2422	MROB_5519	99.61	516	2	0	1	516	1	516	0	1014
ESALQ_2423	MROB_5520	97.84	695	15	0	1	695	39	733	0	1202
ESALQ_2424	MROB_5521	99.62	532	2	0	1	532	1	532	0	1103
ESALQ_2425	MROB_5522	100.00	459	0	0	1	459	1	459	0	959
ESALQ_2426	MROB_5523	97.99	298	6	0	1	298	1	298	0	602
ESALQ_2428	MROB_5525	100.00	353	0	0	1	353	1	353	0	719
ESALQ_2429	MROB_5526	100.00	439	0	0	1	439	1	439	0	900
ESALQ_2430	MROB_5528	99.66	583	2	0	1	583	1	583	0	1198
ESALQ_2431	MROB_5529	100.00	358	0	0	1	358	1	358	0	741
ESALQ_2432	MROB_5530	99.57	697	3	0	1	697	1	697	0	1423
ESALQ_2433	MROB_5531	98.61	574	8	0	1	574	1	574	0	1145
ESALQ_2434	MROB_5532	90.78	575	9	1	1	575	1	531	0	1048
ESALQ_2435	MROB_5533	99.13	574	5	0	1	574	1	574	0	1181
ESALQ_2436	MROB_5534	99.43	348	2	0	1	348	1	348	0	697
ESALQ_2437	MROB_5535	100.00	268	0	0	1	268	1	268	0	529
ESALQ_2438	MROB_5536	98.51	669	10	0	1	669	1	669	0	1359
ESALQ_2439	MROB_5537	98.36	427	7	0	1	427	1	427	0	863
ESALQ_2440	MROB_5539	95.50	556	0	1	1	531	1	556	0	1064
ESALQ_2442	MROB_5541	99.76	849	1	1	1	848	1	849	0	1694
ESALQ_2443	MROB_5542	99.24	394	3	0	1	394	1	394	0	800
ESALQ_2444	MROB_5543	98.28	986	16	1	1	985	1	986	0	1990
ESALQ_2446	MROB_5545	98.66	299	4	0	1	299	1	299	0	590
ESALQ_2449	MROB_5548	97.53	324	8	0	24	347	139	462	0	660
ESALQ_2450	MROB_5549	99.39	330	2	0	1	330	1	330	0	661
ESALQ_2451	MROB_5550	98.41	251	4	0	1	251	1	251	0	511
ESALQ_2453	MROB_5552	99.20	746	6	0	1	746	1	746	0	1503
ESALQ_2455	MROB_5554	90.79	315	5	1	1	315	1	291	0	580
ESALQ_2456	MROB_5555	97.81	456	1	1	1	456	1	447	0	904
ESALQ_2458	MROB_5558	97.84	278	2	1	1	278	1	274	0	553
ESALQ_2459	MROB_5559	99.41	1180	7	0	1	1180	1	1180	0	2411
ESALQ_2460	MROB_5560	98.06	310	0	1	1	304	1	310	0	636
ESALQ_2461	MROB_5561	99.48	575	3	0	1	575	1	575	0	1158
ESALQ_2463	MROB_5563	99.27	410	3	0	1	410	1	410	0	834
ESALQ_2464	MROB_5564	99.13	1143	10	0	1	1143	1	1143	0	2299
ESALQ_2465	MROB_5565	97.31	1039	24	2	1	1039	1	1035	0	2103
ESALQ_2466	MROB_5566	99.79	469	1	0	1	469	1	469	0	966
ESALQ_2467	MROB_5567	99.77	428	1	0	1	428	1	428	0	886
ESALQ_2468	MROB_5568	97.89	331	7	0	1	331	1	331	0	647
ESALQ_2469	MROB_5569	98.97	292	3	0	1	292	1	292	0	595
ESALQ_2470	MROB_5570	99.14	698	6	0	1	698	1	698	0	1429
ESALQ_2471	MROB_5571	98.43	701	11	0	1	701	1	701	0	1422
ESALQ_2473	MROB_5573	99.27	410	3	0	1	410	1	410	0	853
ESALQ_2474	MROB_5574	100.00	345	0	0	1	345	1	345	0	708
ESALQ_2475	MROB_5575	100.00	269	0	0	1	269	1	269	0	554
ESALQ_2476	MROB_5576	99.30	717	5	0	1	717	1	717	0	1433
ESALQ_2478	MROB_5578	99.23	261	2	0	1	261	1	261	0	525
ESALQ_2480	MROB_5580	98.23	282	5	0	1	282	1	282	0	563
ESALQ_2481	MROB_5581	97.59	1201	24	1	1	1201	1	1196	0	2387
ESALQ_2482	MROB_5582	97.92	480	10	0	1	480	1	480	0	978
ESALQ_2483	MROB_5583	99.06	424	4	0	1	424	1	424	0	854
ESALQ_2484	MROB_5584	98.97	291	3	0	1	291	1	291	0	599
ESALQ_2485	MROB_5585	99.74	773	2	0	1	773	1	773	0	1597
ESALQ_2486	MROB_5586	99.02	512	2	1	1	512	1	509	0	1052
ESALQ_2487	MROB_5587	100.00	369	0	0	1	369	1	369	0	761
ESALQ_2488	MROB_5588	99.91	1071	1	0	1	1071	1	1071	0	2216
ESALQ_2489	MROB_5590	97.93	1694	19	2	574	2265	76	1755	0	3382
ESALQ_2490	MROB_5591	99.13	1497	13	0	34	1530	1	1497	0	3044
ESALQ_2491	MROB_5592	98.89	812	6	1	1	812	1	809	0	1672
ESALQ_2492	MROB_5593	97.80	1411	14	2	1	1410	1	1395	0	2833
ESALQ_2495	MROB_5596	99.14	816	6	1	1	815	1	816	0	1675
ESALQ_2496	MROB_5597	96.89	514	9	1	1	507	1	514	0	1018
ESALQ_2497	MROB_5599	99.28	975	7	0	1	975	1	975	0	2030
ESALQ_2498	MROB_5600	96.69	1330	41	2	1	1328	1	1329	0	2635
ESALQ_2499	MROB_5601	99.57	463	2	0	1	463	1	463	0	954
ESALQ_2500	MROB_5602	98.94	283	3	0	1	283	1	283	0	575
ESALQ_2501	MROB_5603	96.78	839	12	1	1	839	1	824	0	1646
ESALQ_2502	MROB_5604	98.66	298	4	0	1	298	1	298	0	612
ESALQ_2504	MROB_5606	98.80	333	4	0	1	333	1	333	0	684
ESALQ_2506	MROB_5608	99.33	598	4	0	1	598	1	598	0	1232
ESALQ_2507	MROB_5609	99.27	413	3	0	1	413	1	413	0	852
ESALQ_2508	MROB_5610	99.63	273	1	0	1	273	1	273	0	548
ESALQ_2509	MROB_5611	99.30	426	3	0	1	426	1	426	0	879
ESALQ_2511	MROB_5613	99.00	804	8	0	1	804	1	804	0	1669
ESALQ_2512	MROB_5614	100.00	606	0	0	1	606	1	606	0	1176
ESALQ_2513	MROB_5615	99.69	326	1	0	1	326	1	326	0	664
ESALQ_2514	MROB_5616	98.73	708	9	0	1	708	1	708	0	1450
ESALQ_2515	MROB_5617	99.23	390	3	0	1	390	1	390	0	785
ESALQ_2518	MROB_5619	98.50	466	7	0	463	928	1	466	0	956
ESALQ_2519	MROB_5621	99.80	501	1	0	1	501	1	501	0	1043
ESALQ_2521	MROB_5622	99.77	434	1	0	1	434	1	434	0	903
ESALQ_2522	MROB_5623	99.89	936	1	0	1	936	1	936	0	1939
ESALQ_2523	MROB_5624	98.21	1288	10	1	1	1275	1	1288	0	2528
ESALQ_2525	MROB_5626	98.84	259	3	0	1	259	1	259	0	522
ESALQ_2526	MROB_5627	100.00	688	0	0	1	688	1	688	0	1424
ESALQ_2527	MROB_5628	99.30	429	3	0	1	429	1	429	0	857
ESALQ_2528	MROB_5629	83.27	490	42	7	1	489	1	451	0	789
ESALQ_2529	MROB_5630	99.55	1543	7	0	1	1543	1	1543	0	3200
ESALQ_2530	MROB_5631	100.00	975	0	0	1	975	1	975	0	2002
ESALQ_2531	MROB_5632	99.65	573	2	0	1	573	1	573	0	1184
ESALQ_2533	MROB_5634	93.45	275	2	1	1	275	1	259	0	506
ESALQ_2534	MROB_5635	98.18	329	6	0	1	329	1	329	0	659
ESALQ_2535	MROB_5636	99.70	333	1	0	1	333	1	333	0	643
ESALQ_2536	MROB_5637	92.54	536	11	3	1	532	1	511	0	975
ESALQ_2538	MROB_5639	98.06	361	7	0	1	361	1	361	0	702
ESALQ_2539	MROB_5640	99.84	1854	3	0	1	1854	1	1854	0	3834
ESALQ_2540	MROB_5641	99.56	458	2	0	1	458	1	458	0	922
ESALQ_2541	MROB_5642	97.71	787	18	0	30	816	28	814	0	1602
ESALQ_2543	MROB_5644	99.29	280	2	0	1	280	1	280	0	565
ESALQ_2545	MROB_5646	97.40	538	14	0	1	538	1	538	0	1088
ESALQ_2546	MROB_5689	96.49	485	10	1	1	478	1	485	0	986
ESALQ_2548	MROB_5649	98.20	891	6	1	1	881	239	1129	0	1820
ESALQ_2549	MROB_5650	99.17	599	5	0	1	599	1	599	0	1236
ESALQ_2551	MROB_5652	99.84	628	1	0	1	628	1	628	0	1301
ESALQ_2552	MROB_5653	100.00	1055	0	0	1	1055	1	1055	0	2094
ESALQ_2553	MROB_5654	99.82	561	1	0	1	561	1	561	0	1148
ESALQ_2554	MROB_5655	98.46	1037	16	0	1	1037	1	1037	0	2075
ESALQ_2555	MROB_5656	99.05	1468	14	0	1	1468	1	1468	0	2930
ESALQ_2557	MROB_5658	99.76	822	2	0	1	822	1	822	0	1653
ESALQ_2558	MROB_5659	99.72	352	1	0	1	352	1	352	0	720
ESALQ_2559	MROB_5660	99.48	576	3	0	1	576	1	576	0	1149
ESALQ_2560	MROB_5661	96.53	749	5	1	1	749	1	728	0	1482
ESALQ_2561	MROB_5662	96.65	448	10	1	1	443	1	448	0	889
ESALQ_2562	MROB_5663	100.00	283	0	0	152	434	1	283	0	602
ESALQ_2563	MROB_5664	98.14	269	5	0	1	269	1	269	0	551
ESALQ_2564	MROB_5665	99.61	255	1	0	1	255	41	295	0	516
ESALQ_2565	MROB_5667	97.95	391	8	0	1	391	1	391	0	791
ESALQ_2566	MROB_5668	97.73	264	6	0	1	264	1	264	0	521
ESALQ_2567	MROB_5669	83.71	313	5	1	1	267	1	313	0	521
ESALQ_2570	MROB_5672	99.61	514	2	0	1	514	1	514	0	1055
ESALQ_2571	MROB_5673	99.25	802	6	0	1	802	1	802	0	1606
ESALQ_2573	MROB_5675	94.72	795	34	1	1	787	1	795	0	1536
ESALQ_2574	MROB_5676	98.91	275	3	0	1	275	1	275	0	550
ESALQ_2575	MROB_5677	98.08	261	5	0	149	409	1	261	0	531
ESALQ_2577	MROB_5679	96.33	735	27	0	1	735	1	735	0	1482
ESALQ_2578	MROB_5680	96.48	341	12	0	1	341	1	341	0	679
ESALQ_2580	MROB_5682	98.91	367	4	0	1	367	1	367	0	718
ESALQ_2581	MROB_5683	98.56	277	4	0	1	277	1	277	0	568
ESALQ_2582	MROB_5684	97.96	540	11	0	1	540	1	540	0	1095
ESALQ_2584	MROB_5686	94.83	696	10	2	1	696	1	670	0	1355
ESALQ_2586	MROB_5688	95.70	535	23	0	1	535	1	535	0	1028
ESALQ_2587	MROB_5690	98.68	380	5	0	1	380	1	380	0	781
ESALQ_2588	MROB_5692	99.07	539	5	0	1	539	1	539	0	1105
ESALQ_2591	MROB_5695	96.27	375	14	0	1	375	1	375	0	739
ESALQ_2592	MROB_5696	98.98	781	8	0	5	785	35	815	0	1595
ESALQ_2593	MROB_5697	98.57	489	7	0	1	489	1	489	0	995
ESALQ_2594	MROB_5698	99.61	257	1	0	1	257	1	257	0	523
ESALQ_2595	MROB_5699	99.53	424	2	0	1	424	1	424	0	866
ESALQ_2596	MROB_5700	100.00	353	0	0	1	353	1	353	0	732
ESALQ_2601	MROB_5705	94.93	276	6	1	1	268	1	276	0	534
ESALQ_2602	MROB_5706	99.24	655	5	0	1	655	515	1169	0	1359
ESALQ_2603	MROB_5706	94.35	513	23	2	1	510	1	510	0	956
ESALQ_2604	MROB_5707	98.73	471	5	1	1	471	1	470	0	954
ESALQ_2605	MROB_5708	99.43	526	3	0	1	526	1	526	0	1087
ESALQ_2606	MROB_5709	99.52	626	3	0	1	626	1	626	0	1231
ESALQ_2608	MROB_5710	98.47	783	8	1	1	783	1	779	0	1564
ESALQ_2609	MROB_5711	93.84	487	1	1	1	487	1	458	0	906
ESALQ_2610	MROB_5712	99.04	313	3	0	1	313	1	313	0	648
ESALQ_2611	MROB_5713	97.82	1285	28	0	1	1285	1	1285	0	2491
ESALQ_2612	MROB_5714	100.00	537	0	0	1	537	1	537	0	1118
ESALQ_2613	MROB_5716	99.68	627	1	1	1	626	1	627	0	1273
ESALQ_2614	MROB_5717	99.74	769	2	0	1	769	1	769	0	1598
ESALQ_2615	MROB_5718	96.62	325	10	1	1	324	1	325	0	575
ESALQ_2616	MROB_5719	96.97	264	8	0	4	267	156	419	0	516
ESALQ_2617	MROB_5721	87.58	765	36	4	1	706	1	765	0	1169
ESALQ_2618	MROB_5722	99.71	684	2	0	1	684	1	684	0	1406
ESALQ_2622	MROB_5725	96.10	667	26	0	1	667	1	667	0	1260
ESALQ_2624	MROB_5727	95.33	621	12	1	1	621	1	604	0	1199
ESALQ_2626	MROB_5728	99.53	645	3	0	1	645	1	645	0	1310
ESALQ_2628	MROB_5730	99.26	408	3	0	1	408	1	408	0	820
ESALQ_2629	MROB_5731	99.34	301	2	0	1	301	1	301	0	607
ESALQ_2630	MROB_5732	99.60	502	2	0	1	502	1	502	0	1020
ESALQ_2632	MROB_5734	98.46	454	7	0	1	454	1	454	0	929
ESALQ_2633	MROB_5735	98.47	457	7	0	1	457	1	457	0	937
ESALQ_2635	MROB_5737	97.50	641	6	1	1	641	1	631	0	1301
ESALQ_2636	MROB_5738	96.62	532	15	2	1	529	1	532	0	1064
ESALQ_2637	MROB_5739	99.23	388	3	0	273	660	1	388	0	799
ESALQ_2638	MROB_5740	97.39	422	2	1	1	422	1	413	0	802
ESALQ_2639	MROB_5741	98.12	320	6	0	1	320	1	320	0	644
ESALQ_2640	MROB_5742	99.67	601	2	0	1	601	1	601	0	1227
ESALQ_2641	MROB_5743	97.35	756	20	0	1	756	1	756	0	1495
ESALQ_2642	MROB_5744	99.36	783	5	0	70	852	19	801	0	1616
ESALQ_2643	MROB_5745	99.52	420	2	0	1	420	1	420	0	864
ESALQ_2644	MROB_5746	99.27	275	1	1	1	274	100	374	0	548
ESALQ_2645	MROB_5747	97.40	539	14	0	1	539	1	539	0	1103
ESALQ_2646	MROB_5748	100.00	489	0	0	1	489	1	489	0	1002
ESALQ_2648	MROB_5750	98.68	1585	16	1	1	1585	1	1580	0	3252
ESALQ_2649	MROB_5751	99.45	548	3	0	1	548	1	548	0	1122
[truncated: 8,630 more rows]

## Sheet: BLASTp_MROB_ESALQ
Query_Mrob	Target_1638	pident	length	mismatch	gapopen	qstart	qend	sstart	send	evalue	bitscore
MROB_1	ESALQ_8796	94.77	976	35	2	633	1592	830	1805	0	1884
MROB_2	ESALQ_8797	98.31	593	10	0	1	593	1	593	0	1198
MROB_7	ESALQ_8811	97.54	285	7	0	1	285	1	285	0	579
MROB_9	ESALQ_8809	97.56	492	12	0	1	492	1	492	0	996
MROB_10	ESALQ_8808	98.89	270	3	0	1	270	1	270	0	553
MROB_11	ESALQ_8807	97.94	3591	71	2	1	3591	1	3588	0	7296
MROB_12	ESALQ_8806	98.50	266	4	0	1	266	1	266	0	538
MROB_13	ESALQ_8805	97.21	788	22	0	1	788	1	788	0	1580
MROB_16	ESALQ_8802	98.80	500	6	0	1	500	1	500	0	1028
MROB_18	ESALQ_8800	96.29	377	14	0	18	394	18	394	0	756
MROB_20	ESALQ_8812	97.18	2128	52	1	1	2120	1	2128	0	4323
MROB_21	ESALQ_8813	99.18	243	2	0	1	243	1	243	0	500
MROB_22	ESALQ_8814	99.27	1506	11	0	1	1506	1	1506	0	3065
MROB_23	ESALQ_8815	97.11	5434	156	1	1	5433	1	5434	0	10993
MROB_24	ESALQ_8816	95.95	1087	44	0	1	1087	1	1087	0	2106
MROB_25	ESALQ_8817	96.00	300	12	0	42	341	100	399	0	595
MROB_26	ESALQ_8818	96.93	1597	49	0	1	1597	1	1597	0	3232
MROB_27	ESALQ_8819	99.21	509	4	0	1	509	1	509	0	1049
MROB_28	ESALQ_8820	98.33	300	5	0	1	300	1	300	0	606
MROB_29	ESALQ_8821	96.37	358	13	0	1	358	1	358	0	709
MROB_30	ESALQ_8822	88.65	564	36	2	1	536	1	564	0	1003
MROB_31	ESALQ_8823	95.30	788	33	1	430	1217	4	787	0	1565
MROB_33	ESALQ_12	44.09	846	400	19	77	887	64	871	0	669
MROB_37	ESALQ_8826	86.97	637	26	2	1	580	1	637	0	1115
MROB_40	ESALQ_8828	98.64	1103	14	1	1	1103	1	1102	0	2258
MROB_41	ESALQ_8829	98.33	779	13	0	1	779	1	779	0	1587
MROB_42	ESALQ_8830	97.43	545	10	1	1	545	25	565	0	1096
MROB_43	ESALQ_8831	98.10	579	11	0	1	579	1	579	0	1176
MROB_45	ESALQ_8833	96.56	610	17	1	137	746	1	606	0	1202
MROB_47	ESALQ_8835	98.63	293	4	0	1	293	1	293	0	584
MROB_48	ESALQ_8836	97.32	447	12	0	1	447	1	447	0	909
MROB_49	ESALQ_8837	92.41	606	24	2	1	605	1	585	0	945
MROB_50	ESALQ_8838	94.41	519	29	0	1	519	1	519	0	1025
MROB_51	ESALQ_8839	95.88	753	26	1	1	753	1	748	0	1491
MROB_52	ESALQ_8840	97.11	623	18	0	1	623	1	623	0	1267
MROB_54	ESALQ_8841	79.58	333	16	1	1	333	1	281	0	531
MROB_56	ESALQ_8843	99.64	551	2	0	1	551	1	551	0	1124
MROB_57	ESALQ_8844	96.47	877	29	2	1	877	1	875	0	1752
MROB_58	ESALQ_8845	96.15	1246	20	1	1	1246	1	1218	0	2486
MROB_60	ESALQ_8847	91.52	719	20	1	1	678	1	719	0	1337
MROB_62	ESALQ_8849	91.64	371	31	0	1	371	1	371	0	711
MROB_63	ESALQ_8850	95.97	273	11	0	1	273	1	273	0	547
MROB_64	ESALQ_8851	64.73	791	253	4	1	774	1	782	0	986
MROB_65	ESALQ_8852	99.13	346	3	0	1	346	1	346	0	697
MROB_66	ESALQ_8853	99.26	542	4	0	1	542	1	542	0	1070
MROB_67	ESALQ_8853	98.21	504	9	0	1	504	610	1113	0	1030
MROB_69	ESALQ_8855	98.47	326	5	0	1	326	139	464	0	674
MROB_71	ESALQ_8857	98.06	1031	1	1	1	1012	1	1031	0	2097
MROB_72	ESALQ_8858	100.00	357	0	0	1	357	1	357	0	685
MROB_73	ESALQ_8859	98.63	729	10	0	1	729	1	729	0	1461
MROB_74	ESALQ_8860	99.32	586	4	0	1	586	1	586	0	1195
MROB_75	ESALQ_8861	99.65	862	3	0	1	862	1	862	0	1788
MROB_76	ESALQ_8862	98.07	831	16	0	1	831	1	831	0	1689
MROB_77	ESALQ_8863	99.37	637	4	0	1	637	1	637	0	1288
MROB_79	ESALQ_8867	94.81	443	10	1	1	443	1	430	0	840
MROB_80	ESALQ_8868	99.69	981	3	0	1	981	1	981	0	2037
MROB_81	ESALQ_8869	98.44	256	4	0	1	256	1	256	0	517
MROB_82	ESALQ_8870	98.68	380	4	1	1	379	1	380	0	721
MROB_83	ESALQ_8871	99.82	543	1	0	1	543	1	543	0	1116
MROB_84	ESALQ_8872	97.91	287	6	0	1	287	1	287	0	558
MROB_85	ESALQ_8873	96.56	697	16	3	1	697	1	689	0	1261
MROB_87	ESALQ_8875	98.02	656	13	0	44	699	12	667	0	1327
MROB_88	ESALQ_8876	98.48	857	13	0	1	857	1	857	0	1741
MROB_89	ESALQ_8877	99.08	650	6	0	1	650	1	650	0	1337
MROB_90	ESALQ_8877	91.75	715	10	2	7	721	872	1537	0	1332
MROB_91	ESALQ_8878	96.10	2669	70	2	1	2635	1	2669	0	5308
MROB_92	ESALQ_8879	97.82	505	11	0	1	505	1	505	0	1012
MROB_94	ESALQ_7967	62.23	707	235	7	1	680	1	702	0	880
MROB_96	ESALQ_7966	69.97	393	107	3	50	432	1	392	0	558
MROB_99	ESALQ_7971	75.30	502	113	4	1	499	1	494	0	746
MROB_101	ESALQ_7968	80.07	542	96	4	1	540	1	532	0	850
MROB_103	ESALQ_972	94.77	363	16	2	39	398	1	363	0	674
MROB_104	ESALQ_971	97.08	274	6	1	1	272	1	274	0	553
MROB_105	ESALQ_970	99.63	536	2	0	1	536	1	536	0	1112
MROB_106	ESALQ_969	98.17	273	5	0	1	273	1	273	0	555
MROB_107	ESALQ_968	99.27	548	4	0	5	552	39	586	0	1112
MROB_108	ESALQ_967	86.17	405	20	1	1	405	1	369	0	592
MROB_109	ESALQ_966	98.61	431	6	0	29	459	1	431	0	867
MROB_110	ESALQ_965	98.64	368	5	0	1	368	1	368	0	756
MROB_111	ESALQ_7965	99.48	580	3	0	1	580	1	580	0	1195
MROB_112	ESALQ_7964	98.46	325	5	0	1	325	1	325	0	659
MROB_113	ESALQ_7963	92.22	733	38	1	1	714	1	733	0	1407
MROB_115	ESALQ_7961	97.83	414	8	1	1	413	1	414	0	825
MROB_116	ESALQ_7960	98.62	1305	16	2	1	1304	1	1304	0	2627
MROB_117	ESALQ_7959	98.84	516	6	0	1	516	1	516	0	1007
MROB_119	ESALQ_7957	72.52	866	102	11	1	801	1	795	0	971
MROB_121	ESALQ_7955	100.00	507	0	0	1	507	1	507	0	1052
MROB_122	ESALQ_7954	93.82	356	22	0	1	356	1	356	0	665
MROB_123	ESALQ_7953	97.37	418	10	1	1	417	1	418	0	850
MROB_124	ESALQ_7952	99.45	363	2	0	1	363	1	363	0	746
MROB_125	ESALQ_7951	99.12	341	3	0	1	341	30	370	0	660
MROB_126	ESALQ_7949	97.05	475	14	0	1	475	1	475	0	952
MROB_128	ESALQ_7947	90.80	489	45	0	1	489	1	489	0	875
MROB_129	ESALQ_7946	98.35	303	5	0	1	303	276	578	0	618
MROB_131	ESALQ_7945	95.07	689	7	1	1	662	1	689	0	1338
MROB_132	ESALQ_7944	97.75	577	13	0	1	577	1	577	0	1159
MROB_133	ESALQ_7943	98.80	917	11	0	1	917	1	917	0	1883
MROB_134	ESALQ_7942	96.34	574	16	1	1	569	1	574	0	1150
MROB_135	ESALQ_7941	97.21	358	10	0	4	361	17	374	0	719
MROB_136	ESALQ_7940	96.51	544	14	1	1	544	45	583	0	1061
MROB_140	ESALQ_7936	97.30	259	7	0	1	259	1	259	0	503
MROB_142	ESALQ_7934	96.59	820	28	0	1	820	1	820	0	1644
MROB_143	ESALQ_7933	66.46	480	103	4	362	785	112	589	0	619
MROB_145	ESALQ_7931	99.42	855	5	0	1	855	1	855	0	1733
MROB_146	ESALQ_7930	97.90	333	6	1	1	332	1	333	0	657
MROB_148	ESALQ_7928	93.64	770	19	2	43	812	9	748	0	1468
MROB_149	ESALQ_7927	98.69	381	5	0	1	381	1	381	0	787
MROB_150	ESALQ_7926	99.33	745	5	0	1	745	1	745	0	1526
MROB_152	ESALQ_7924	100.00	663	0	0	129	791	1	663	0	1357
MROB_153	ESALQ_7923	98.21	613	11	0	1	613	1	613	0	1228
MROB_156	ESALQ_8886	97.12	867	12	3	688	1553	27	881	0	1709
MROB_157	ESALQ_8884	96.80	281	9	0	1	281	1	281	0	566
MROB_159	ESALQ_7973	93.71	493	31	0	1	493	1	493	0	881
MROB_160	ESALQ_7974	95.61	615	26	1	1	615	1	614	0	1209
MROB_161	ESALQ_7975	91.38	441	19	1	1	422	1	441	0	791
MROB_163	ESALQ_7978	98.96	289	3	0	175	463	1	289	0	556
MROB_165	ESALQ_7979	97.95	487	10	0	1	487	1	487	0	997
MROB_166	ESALQ_7980	99.08	327	3	0	1	327	1	327	0	666
MROB_168	ESALQ_7982	98.05	512	10	0	1	512	1	512	0	1029
MROB_169	ESALQ_7983	98.86	437	5	0	1	437	1	437	0	877
MROB_170	ESALQ_7984	97.99	349	7	0	1	349	1	349	0	678
MROB_172	ESALQ_7985	97.75	444	10	0	1	444	157	600	0	904
MROB_174	ESALQ_7987	99.03	1032	8	2	1	1031	1	1031	0	1986
MROB_175	ESALQ_7988	99.70	659	2	0	1	659	1	659	0	1243
MROB_176	ESALQ_7989	98.16	272	5	0	1	272	1	272	0	539
MROB_178	ESALQ_7991	100.00	584	0	0	1	584	1	584	0	1166
MROB_179	ESALQ_7992	98.65	443	6	0	1	443	1	443	0	909
MROB_186	ESALQ_7999	100.00	473	0	0	1	473	1	473	0	961
MROB_187	ESALQ_8000	97.48	555	14	0	81	635	1	555	0	1102
MROB_188	ESALQ_8001	98.66	819	11	0	1	819	1	819	0	1578
MROB_189	ESALQ_8002	100.00	338	0	0	1	338	1	338	0	687
MROB_190	ESALQ_8003	99.79	480	1	0	1	480	1	480	0	968
MROB_191	ESALQ_8004	97.09	378	11	0	1	378	1	378	0	751
MROB_196	ESALQ_8008	97.13	907	11	1	1	892	1	907	0	1828
MROB_197	ESALQ_8009	96.68	512	2	1	1	512	1	497	0	979
MROB_198	ESALQ_8010	94.38	320	15	1	1	320	1	317	0	584
MROB_199	ESALQ_8011	95.99	399	16	0	1	399	1	399	0	689
MROB_202	ESALQ_8014	98.28	524	9	0	1	524	1	524	0	1054
MROB_203	ESALQ_8015	83.54	407	24	6	1	403	1	368	0	582
MROB_204	ESALQ_8016	89.28	1175	59	8	1	1113	1	1170	0	2088
MROB_205	ESALQ_8017	99.40	336	2	0	1	336	1	336	0	693
MROB_207	ESALQ_8019	99.29	282	2	0	1	282	1	282	0	570
MROB_211	ESALQ_8023	99.84	1248	2	0	1	1248	1	1248	0	2541
MROB_212	ESALQ_8024	99.69	648	2	0	1	648	1	648	0	1293
MROB_213	ESALQ_8025	94.69	866	15	2	1	835	1	866	0	1649
MROB_214	ESALQ_8026	98.59	354	5	0	1	354	1	354	0	720
MROB_215	ESALQ_8027	99.68	317	1	0	1	317	1	317	0	645
MROB_216	ESALQ_8028	99.59	485	2	0	1	485	1	485	0	975
MROB_217	ESALQ_8030	96.38	1189	5	1	1	1189	1	1151	0	2343
MROB_218	ESALQ_8031	99.24	661	5	0	1	661	1	661	0	1354
MROB_220	ESALQ_8032	98.19	441	8	0	1	441	1	441	0	872
MROB_221	ESALQ_8033	99.23	521	4	0	1	521	1	521	0	1063
MROB_223	ESALQ_8035	99.10	442	4	0	1	442	1	442	0	890
MROB_224	ESALQ_8036	95.93	761	12	2	1	761	1	742	0	1494
MROB_225	ESALQ_8037	100.00	391	0	0	1	391	1	391	0	805
MROB_226	ESALQ_8038	98.95	861	8	1	1	860	1	861	0	1662
MROB_228	ESALQ_8039	99.44	358	2	0	1	358	1	358	0	714
MROB_229	ESALQ_8040	99.29	283	2	0	1	283	1	283	0	572
MROB_230	ESALQ_8041	99.10	670	6	0	1	670	1	670	0	1287
MROB_232	ESALQ_8043	95.83	815	18	1	1	799	1	815	0	1580
MROB_233	ESALQ_8044	98.78	657	0	1	1	649	1	657	0	1322
MROB_234	ESALQ_8045	99.43	352	2	0	1	352	1	352	0	724
MROB_235	ESALQ_8046	99.60	252	1	0	1	252	1	252	0	516
MROB_236	ESALQ_8047	99.51	1015	5	0	1	1015	1	1015	0	2045
MROB_237	ESALQ_8048	76.41	479	59	6	1	428	1	476	0	692
MROB_240	ESALQ_8050	95.11	409	19	1	1	408	1	409	0	713
MROB_241	ESALQ_8052	99.34	1818	9	2	1	1816	254	2070	0	3436
MROB_242	ESALQ_8053	99.70	334	1	0	1	334	1	334	0	695
MROB_243	ESALQ_8054	99.03	310	3	0	1	310	1	310	0	635
MROB_244	ESALQ_8055	98.98	392	4	0	1	392	1	392	0	812
MROB_246	ESALQ_8057	99.34	301	2	0	1	301	1	301	0	603
MROB_248	ESALQ_8059	96.96	560	17	0	77	636	68	627	0	1028
MROB_249	ESALQ_8060	92.96	398	21	1	1	398	1	391	0	735
MROB_250	ESALQ_8061	94.37	373	21	0	1	373	1	373	0	657
MROB_253	ESALQ_8063	90.63	459	14	1	1	459	1	430	0	861
MROB_254	ESALQ_8064	94.32	898	32	1	1	879	1	898	0	1734
MROB_255	ESALQ_8065	99.14	350	3	0	1	350	1	350	0	715
MROB_256	ESALQ_8066	97.95	391	8	0	1	391	1	391	0	784
MROB_257	ESALQ_8067	96.43	420	15	0	1	420	50	469	0	847
MROB_260	ESALQ_8070	87.43	358	7	1	1	320	1	358	0	572
MROB_261	ESALQ_8071	98.04	663	13	0	1	663	1	663	0	1354
MROB_263	ESALQ_8073	99.74	768	2	0	1	768	1	768	0	1589
MROB_264	ESALQ_8074	99.68	309	1	0	1	309	1	309	0	627
MROB_265	ESALQ_8075	94.65	1720	74	1	1	1702	1	1720	0	2758
MROB_266	ESALQ_8076	99.76	423	1	0	1	423	1	423	0	853
MROB_269	ESALQ_8079	100.00	268	0	0	1	268	1	268	0	560
MROB_271	ESALQ_8081	98.23	678	12	0	1	678	1	678	0	1372
MROB_275	ESALQ_8085	96.42	335	7	2	1	333	1	332	0	636
MROB_276	ESALQ_8086	95.32	299	13	1	1	298	1	299	0	577
MROB_277	ESALQ_8087	91.93	632	8	1	1	589	1	632	0	1165
MROB_278	ESALQ_8088	99.46	742	4	0	1	742	1	742	0	1536
MROB_279	ESALQ_8090	100.00	299	0	0	1	299	1	299	0	578
MROB_280	ESALQ_8091	99.12	340	3	0	1	340	1	340	0	692
MROB_282	ESALQ_8093	99.58	721	3	0	1	721	1	721	0	1506
MROB_284	ESALQ_8095	99.49	589	3	0	1	589	1	589	0	1194
MROB_285	ESALQ_8096	99.27	275	2	0	1	275	1	275	0	560
MROB_286	ESALQ_8097	98.58	844	12	0	1	844	1	844	0	1688
MROB_287	ESALQ_8098	99.28	1398	8	1	26	1421	1	1398	0	2814
MROB_288	ESALQ_8099	98.98	685	7	0	1	685	1	685	0	1390
MROB_290	ESALQ_8100	99.78	458	1	0	1	458	1	458	0	928
MROB_291	ESALQ_8101	98.51	470	5	1	1	468	1	470	0	934
MROB_293	ESALQ_8103	99.55	664	3	0	1	664	1	664	0	1371
MROB_294	ESALQ_8104	98.53	272	4	0	1	272	1	272	0	546
MROB_295	ESALQ_8105	94.51	437	2	1	22	436	1	437	0	845
MROB_296	ESALQ_8106	98.94	757	8	0	1	757	1	757	0	1562
MROB_297	ESALQ_8107	99.73	366	1	0	1	366	1	366	0	764
MROB_298	ESALQ_8108	95.55	292	4	1	1	292	1	283	0	548
MROB_299	ESALQ_8109	98.25	458	8	0	1	458	1	458	0	933
MROB_300	ESALQ_8110	99.03	514	5	0	1	514	1	514	0	1055
MROB_302	ESALQ_8114	90.17	417	34	1	1	410	1	417	0	771
MROB_303	ESALQ_8115	99.41	340	2	0	1	340	1	340	0	700
MROB_304	ESALQ_8116	98.21	616	11	0	1	616	1	616	0	1260
MROB_305	ESALQ_8117	99.17	360	3	0	1	360	1	360	0	729
MROB_306	ESALQ_8118	99.17	480	4	0	1	480	1	480	0	957
MROB_307	ESALQ_8119	98.58	635	9	0	1	635	26	660	0	1276
MROB_308	ESALQ_8120	99.21	761	6	0	1	761	1	761	0	1573
MROB_309	ESALQ_8121	96.50	429	15	0	1	429	1	429	0	853
MROB_311	ESALQ_8123	93.09	333	7	1	1	317	1	333	0	627
MROB_312	ESALQ_8124	97.72	613	14	0	1	613	1	613	0	1244
MROB_314	ESALQ_8126	99.69	326	1	0	1	326	1	326	0	661
MROB_315	ESALQ_8127	99.47	374	2	0	1	374	1	374	0	772
MROB_316	ESALQ_8128	100.00	558	0	0	1	558	1	558	0	1098
MROB_317	ESALQ_8129	98.32	772	13	0	1	772	1	772	0	1572
MROB_318	ESALQ_8130	97.47	277	7	0	1	277	1	277	0	552
MROB_319	ESALQ_8131	88.96	335	33	1	1	335	1	331	0	516
MROB_320	ESALQ_8132	97.51	1443	36	0	71	1513	7	1449	0	2888
MROB_321	ESALQ_8133	89.07	659	50	1	1	637	1	659	0	1231
MROB_322	ESALQ_8134	95.90	488	20	0	1	488	63	550	0	949
MROB_323	ESALQ_8135	99.36	469	3	0	1	469	1	469	0	944
MROB_324	ESALQ_8136	99.42	1200	7	0	1	1200	63	1262	0	2382
MROB_325	ESALQ_8137	99.73	752	2	0	1	752	1	752	0	1555
MROB_326	ESALQ_8138	97.89	426	8	1	1	426	1	425	0	856
MROB_327	ESALQ_8139	99.89	898	1	0	1	898	1	898	0	1876
MROB_328	ESALQ_8140	99.64	281	1	0	1	281	1	281	0	579
MROB_330	ESALQ_8142	99.79	474	1	0	1	474	1	474	0	982
MROB_331	ESALQ_8143	75.47	428	101	1	1	428	1	424	0	626
MROB_332	ESALQ_8144	90.18	275	27	0	1	275	1	275	0	508
MROB_333	ESALQ_8145	90.10	485	30	1	1	467	1	485	0	906
MROB_338	ESALQ_8151	99.01	302	3	0	1	302	1	302	0	619
MROB_340	ESALQ_8153	99.78	905	2	0	1	905	1	905	0	1894
MROB_341	ESALQ_8154	98.71	388	5	0	1	388	1	388	0	802
MROB_342	ESALQ_8155	99.21	507	4	0	1	507	1	507	0	1022
MROB_343	ESALQ_8156	93.16	351	19	1	1	346	1	351	0	677
MROB_344	ESALQ_8157	100.00	540	0	0	1	540	1	540	0	1103
MROB_346	ESALQ_8159	99.38	482	3	0	1	482	1	482	0	956
MROB_347	ESALQ_8160	98.48	1976	29	1	1	1976	100	2074	0	3977
MROB_349	ESALQ_8162	99.76	821	2	0	1	821	1	821	0	1694
MROB_351	ESALQ_8163	98.61	505	7	0	1	505	673	1177	0	1027
MROB_352	ESALQ_8163	89.89	544	15	2	1	506	1	542	0	998
MROB_354	ESALQ_2853	98.26	287	5	0	1	287	1	287	0	592
MROB_355	ESALQ_2854	98.28	580	10	0	1	580	1	580	0	1182
MROB_356	ESALQ_2855	99.00	501	5	0	1	501	1	501	0	1016
MROB_357	ESALQ_2856	89.83	757	56	5	1	755	1	738	0	1349
MROB_358	ESALQ_2857	99.17	480	4	0	1	480	1	480	0	971
MROB_359	ESALQ_2858	98.49	662	8	1	1	660	1	662	0	1331
MROB_360	ESALQ_2859	92.10	367	29	0	1	367	1	367	0	644
MROB_363	ESALQ_2862	99.10	334	3	0	1	334	1	334	0	691
MROB_364	ESALQ_2863	74.71	680	67	9	1	677	1	578	0	957
MROB_365	ESALQ_2864	99.52	1032	5	0	1	1032	1	1032	0	2083
MROB_366	ESALQ_2865	100.00	567	0	0	1	567	1	567	0	1088
MROB_367	ESALQ_2866	96.80	532	17	0	1	532	1	532	0	1062
MROB_368	ESALQ_2867	97.25	363	10	0	1	363	1	363	0	742
MROB_369	ESALQ_2868	96.68	572	19	0	1	572	1	572	0	1135
MROB_370	ESALQ_2869	99.28	690	5	0	1	690	1	690	0	1439
MROB_371	ESALQ_2870	98.79	412	5	0	1	412	1	412	0	852
MROB_372	ESALQ_2871	97.73	485	11	0	17	501	167	651	0	985
MROB_373	ESALQ_2872	97.24	254	7	0	1	254	1	254	0	521
MROB_374	ESALQ_2873	99.08	975	9	0	1	975	1	975	0	1976
MROB_376	ESALQ_2875	99.67	300	1	0	1	300	1	300	0	614
MROB_378	ESALQ_2877	100.00	482	0	0	1	482	1	482	0	973
MROB_379	ESALQ_2878	93.30	761	7	3	1	750	1	728	0	1430
MROB_380	ESALQ_2879	98.66	744	10	0	1	744	1	744	0	1513
MROB_381	ESALQ_2880	99.74	387	1	0	1	387	1	387	0	790
MROB_383	ESALQ_2882	99.47	379	2	0	1	379	1	379	0	764
MROB_387	ESALQ_2886	99.77	436	1	0	1	436	1	436	0	902
MROB_388	ESALQ_2887	98.77	489	6	0	1	489	1	489	0	993
MROB_390	ESALQ_2889	99.48	387	2	0	1	387	1	387	0	802
MROB_391	ESALQ_2890	98.06	360	0	1	1	353	2	361	0	734
MROB_393	ESALQ_2892	97.73	485	11	0	1	485	1	485	0	975
MROB_395	ESALQ_2894	95.69	348	14	1	1	348	1	347	0	684
MROB_396	ESALQ_2895	96.01	602	4	1	1	582	104	705	0	1172
MROB_397	ESALQ_2897	95.82	598	20	2	1	596	1	595	0	1185
MROB_398	ESALQ_2898	97.10	276	8	0	9	284	53	328	0	553
MROB_399	ESALQ_2899	98.59	427	6	0	1	427	1	427	0	866
MROB_400	ESALQ_2900	98.30	765	13	0	1	765	1	765	0	1555
MROB_401	ESALQ_2902	100.00	353	0	0	1	353	1	353	0	728
MROB_402	ESALQ_2903	99.02	409	4	0	1	409	1	409	0	833
MROB_404	ESALQ_2905	98.41	502	8	0	1	502	1	502	0	1028
MROB_405	ESALQ_2906	96.87	702	22	0	1	702	1	702	0	1425
MROB_406	ESALQ_2907	99.82	551	1	0	1	551	1	551	0	1130
MROB_407	ESALQ_2908	98.13	748	12	1	1	746	1	748	0	1451
MROB_409	ESALQ_2909	99.24	791	6	0	1	791	1	791	0	1603
MROB_410	ESALQ_2910	100.00	344	0	0	1	344	1	344	0	704
MROB_411	ESALQ_2911	99.62	266	1	0	1	266	1	266	0	538
MROB_412	ESALQ_2912	100.00	498	0	0	1	498	1	498	0	1016
MROB_416	ESALQ_2915	97.47	792	18	2	1	790	532	1323	0	1594
MROB_417	ESALQ_2915	97.62	462	7	1	1	462	1	458	0	940
MROB_419	ESALQ_2917	93.69	1094	39	3	1	1093	1	1065	0	2108
MROB_421	ESALQ_2919	99.43	527	3	0	1	527	1	527	0	1098
MROB_422	ESALQ_2920	96.51	459	16	0	1	459	1	459	0	905
MROB_423	ESALQ_2921	98.32	417	7	0	1	417	1	417	0	858
MROB_424	ESALQ_2922	99.02	1122	11	0	1	1122	1	1122	0	2326
MROB_425	ESALQ_2923	98.10	473	9	0	1	473	7	479	0	959
MROB_427	ESALQ_2926	98.45	517	8	0	536	1052	84	600	0	1069
MROB_428	ESALQ_2927	99.55	663	3	0	1	663	1	663	0	1383
MROB_431	ESALQ_2930	98.10	369	7	0	1	369	1	369	0	747
MROB_432	ESALQ_2932	97.17	1166	33	0	463	1628	1	1166	0	2368
MROB_433	ESALQ_2933	99.80	491	1	0	1	491	1	491	0	995
MROB_434	ESALQ_2934	100.00	442	0	0	1	442	1	442	0	902
MROB_437	ESALQ_2937	96.52	345	2	1	1	335	1	345	0	687
MROB_438	ESALQ_2938	99.28	419	3	0	1	419	1	419	0	854
MROB_439	ESALQ_2939	98.61	935	10	1	1	935	1	932	0	1805
MROB_440	ESALQ_2940	98.48	395	6	0	1	395	1	395	0	800
MROB_441	ESALQ_2942	98.93	280	3	0	1	280	1	280	0	565
MROB_443	ESALQ_2944	99.44	716	4	0	1	716	1	716	0	1454
MROB_444	ESALQ_2945	100.00	395	0	0	1	395	1	395	0	771
MROB_445	ESALQ_2946	99.44	540	3	0	1	540	1	540	0	1086
MROB_446	ESALQ_2947	100.00	502	0	0	1	502	1	502	0	982
MROB_447	ESALQ_2949	99.24	394	3	0	1	394	1	394	0	773
MROB_448	ESALQ_2950	94.56	515	25	1	1	512	1	515	0	792
MROB_450	ESALQ_2952	99.50	1005	5	0	96	1100	1	1005	0	2075
MROB_451	ESALQ_2953	99.13	344	3	0	1	344	1	344	0	710
MROB_452	ESALQ_2954	99.37	634	4	0	1	634	1	634	0	1306
MROB_453	ESALQ_2955	98.24	340	6	0	3	342	1	340	0	664
MROB_455	ESALQ_2957	99.76	422	1	0	1	422	1	422	0	844
MROB_456	ESALQ_2958	98.45	386	6	0	26	411	31	416	0	790
MROB_457	ESALQ_2959	99.58	960	4	0	1	960	1	960	0	1955
MROB_461	ESALQ_2963	97.39	306	8	0	17	322	3	308	0	578
MROB_462	ESALQ_2964	97.16	493	13	1	1	493	1	492	0	897
MROB_463	ESALQ_2965	100.00	548	0	0	1	548	23	570	0	1146
MROB_466	ESALQ_2968	99.77	427	1	0	1	427	1	427	0	887
MROB_467	ESALQ_2969	98.65	966	7	1	1	960	1	966	0	1957
MROB_468	ESALQ_2970	98.48	395	6	0	1	395	1	395	0	803
MROB_469	ESALQ_2971	97.13	453	13	0	1	453	1	453	0	881
MROB_470	ESALQ_2972	98.74	712	9	0	1	712	1	712	0	1451
MROB_471	ESALQ_2973	99.02	410	4	0	1	410	1	410	0	836
MROB_472	ESALQ_2974	96.88	384	12	0	1	384	1	384	0	741
MROB_473	ESALQ_2975	97.38	305	8	0	1	305	1	305	0	593
MROB_474	ESALQ_2977	97.78	405	9	0	1	405	559	963	0	800
MROB_475	ESALQ_2977	88.80	393	9	1	1	358	1	393	0	716
MROB_476	ESALQ_2978	99.55	448	2	0	1	448	1	448	0	927
MROB_477	ESALQ_2979	99.24	917	7	0	1	917	1	917	0	1868
MROB_478	ESALQ_2980	95.83	1248	11	2	1	1248	1	1207	0	2459
MROB_479	ESALQ_2981	97.63	422	10	0	53	474	1	422	0	831
MROB_480	ESALQ_2982	98.70	308	4	0	1	308	1	308	0	622
MROB_481	ESALQ_2983	99.11	1341	12	0	1	1341	1	1341	0	2733
MROB_482	ESALQ_2984	98.45	516	8	0	1	516	1	516	0	1044
MROB_483	ESALQ_2985	99.35	462	3	0	1	462	1	462	0	956
MROB_484	ESALQ_2987	97.28	294	8	0	1	294	170	463	0	580
MROB_485	ESALQ_2988	100.00	337	0	0	1	337	1	337	0	706
MROB_487	ESALQ_2990	98.53	272	4	0	1	272	1	272	0	538
MROB_488	ESALQ_2991	98.41	567	9	0	1	567	1	567	0	1154
MROB_489	ESALQ_2992	100.00	292	0	0	1	292	1	292	0	615
MROB_490	ESALQ_2993	98.46	454	7	0	1	454	1	454	0	925
MROB_491	ESALQ_2994	98.15	702	13	0	1	702	1	702	0	1420
MROB_492	ESALQ_2995	99.09	330	3	0	1	330	1	330	0	682
MROB_493	ESALQ_2996	98.10	316	6	0	1	316	1	316	0	643
MROB_494	ESALQ_2997	97.59	291	7	0	1	291	1	291	0	575
MROB_496	ESALQ_2999	99.12	340	3	0	1	340	1	340	0	697
MROB_497	ESALQ_3000	99.80	489	1	0	1	489	1	489	0	992
MROB_498	ESALQ_3001	99.04	416	4	0	1	416	1	416	0	860
MROB_499	ESALQ_3002	99.70	660	2	0	1	660	1	660	0	1365
MROB_500	ESALQ_3003	99.15	352	3	0	1	352	1	352	0	718
MROB_501	ESALQ_3004	96.55	580	20	0	1	580	1	580	0	1148
MROB_502	ESALQ_3005	98.38	739	12	0	18	756	1	739	0	1463
MROB_503	ESALQ_3006	99.01	304	3	0	1	304	1	304	0	629
MROB_504	ESALQ_3007	97.58	454	11	0	1	454	1	454	0	909
MROB_505	ESALQ_3008	96.86	510	16	0	1	510	1	510	0	1036
MROB_506	ESALQ_5648	70.04	504	144	2	15	518	194	690	0	718
MROB_508	ESALQ_3010	97.07	341	10	0	1	341	39	379	0	673
MROB_509	ESALQ_3011	97.77	359	8	0	62	420	16	374	0	731
MROB_510	ESALQ_3012	97.70	435	10	0	1	435	1	435	0	879
MROB_512	ESALQ_3014	99.30	427	3	0	59	485	1	427	0	830
MROB_513	ESALQ_3015	98.63	291	4	0	1	291	1	291	0	584
MROB_516	ESALQ_3017	97.72	1051	24	0	1	1051	1	1051	0	2088
MROB_517	ESALQ_3018	98.44	895	11	1	1	892	1	895	0	1806
MROB_518	ESALQ_3019	97.50	360	9	0	1	360	1	360	0	736
MROB_519	ESALQ_3020	95.25	295	14	0	1	295	1	295	0	561
MROB_520	ESALQ_3021	98.48	263	4	0	1	263	1	263	0	520
MROB_521	ESALQ_3022	100.00	339	0	0	1	339	1	339	0	699
MROB_522	ESALQ_3023	97.94	872	5	1	1	859	1	872	0	1773
MROB_523	ESALQ_3024	97.99	497	10	0	1	497	1	497	0	1003
MROB_524	ESALQ_3024	80.66	698	73	7	1	636	592	1289	0	1056
MROB_525	ESALQ_3025	99.03	516	5	0	1	516	1	516	0	1045
MROB_526	ESALQ_3026	99.42	1197	7	0	594	1790	1	1197	0	2300
MROB_527	ESALQ_3028	98.89	271	3	0	1	271	1	271	0	544
MROB_529	ESALQ_3030	100.00	461	0	0	1	461	1	461	0	949
MROB_530	ESALQ_3031	99.75	408	1	0	1	408	1	408	0	853
MROB_531	ESALQ_3032	98.18	1153	18	2	1	1151	1	1152	0	2297
MROB_532	ESALQ_3033	99.67	305	1	0	1	305	1	305	0	629
MROB_533	ESALQ_3034	98.30	1592	27	0	1	1592	1	1592	0	3229
MROB_534	ESALQ_3035	96.70	485	16	0	1	485	74	558	0	964
MROB_537	ESALQ_3038	99.33	297	2	0	1	297	1	297	0	611
MROB_538	ESALQ_3039	97.08	342	10	0	1	342	1	342	0	682
MROB_540	ESALQ_3041	99.72	1419	4	0	1	1419	1	1419	0	2926
MROB_541	ESALQ_3042	99.25	532	4	0	1	532	1	532	0	1075
MROB_542	ESALQ_3043	97.98	346	7	0	1	346	1	346	0	698
MROB_544	ESALQ_3045	99.80	488	1	0	32	519	11	498	0	1013
MROB_546	ESALQ_3047	98.50	267	4	0	1	267	1	267	0	545
MROB_547	ESALQ_3048	97.96	490	10	0	1	490	1	490	0	976
MROB_549	ESALQ_3051	99.86	702	1	0	1	702	1	702	0	1439
MROB_550	ESALQ_3052	98.70	463	6	0	16	478	100	562	0	955
MROB_551	ESALQ_3053	99.31	2305	16	0	57	2361	91	2395	0	4665
MROB_552	ESALQ_3054	98.69	536	7	0	1	536	1	536	0	1105
MROB_553	ESALQ_3055	94.57	626	13	2	1	616	1	615	0	1146
MROB_554	ESALQ_3056	99.50	997	1	1	1	997	1	993	0	2038
MROB_555	ESALQ_3057	100.00	252	0	0	2	253	3	254	0	505
MROB_556	ESALQ_3058	99.60	500	2	0	1	500	1	500	0	1029
MROB_559	ESALQ_3061	95.43	678	29	1	1	678	1	676	0	1082
MROB_561	ESALQ_3063	98.61	1009	14	0	1	1009	543	1551	0	2032
MROB_562	ESALQ_3063	97.32	523	14	0	1	523	1	523	0	1071
MROB_563	ESALQ_3064	99.51	1014	5	0	1255	2268	9	1022	0	2058
MROB_564	ESALQ_3066	96.24	479	11	2	1	479	1	472	0	952
MROB_566	ESALQ_3068	99.00	1196	12	0	1	1196	1	1196	0	2448
MROB_567	ESALQ_3069	97.11	693	20	0	1	693	1	693	0	1385
MROB_568	ESALQ_3070	99.27	275	2	0	105	379	1	275	0	570
MROB_569	ESALQ_3071	98.03	559	11	0	1	559	1	559	0	1145
MROB_570	ESALQ_3072	99.49	587	3	0	1	587	1	587	0	1200
MROB_571	ESALQ_3073	99.26	406	3	0	1	406	1	406	0	828
MROB_572	ESALQ_3074	99.31	869	6	0	1	869	1	869	0	1790
MROB_573	ESALQ_3075	97.24	399	9	1	1	399	1	397	0	781
MROB_574	ESALQ_3076	97.99	1396	28	0	74	1469	19	1414	0	2838
MROB_575	ESALQ_3077	97.85	606	13	0	1	606	34	639	0	1197
MROB_576	ESALQ_3078	98.72	392	5	0	1	392	1	392	0	790
MROB_577	ESALQ_3079	100.00	253	0	0	1	253	1	253	0	499
MROB_578	ESALQ_3080	100.00	342	0	0	1	342	1	342	0	702
MROB_579	ESALQ_3081	87.95	863	49	3	55	862	4	866	0	1538
MROB_580	ESALQ_3082	98.27	1851	29	1	1	1851	1	1848	0	3710
MROB_581	ESALQ_3083	98.66	298	4	0	1	298	1	298	0	613
MROB_582	ESALQ_3084	99.69	327	1	0	90	416	1	327	0	665
MROB_583	ESALQ_3085	99.47	377	2	0	1	377	1	377	0	776
MROB_584	ESALQ_3086	98.35	1150	13	1	1	1150	1	1144	0	2231
MROB_585	ESALQ_3087	96.64	743	25	0	14	756	54	796	0	1465
MROB_586	ESALQ_3088	98.58	847	12	0	1	847	1	847	0	1727
MROB_587	ESALQ_3089	98.91	457	3	1	1	455	1	457	0	928
MROB_591	ESALQ_3094	97.42	310	8	0	1	310	1	310	0	634
MROB_593	ESALQ_3096	96.39	554	20	0	1	554	1	554	0	1106
MROB_595	ESALQ_3098	97.44	625	16	0	1	625	1	625	0	1226
MROB_596	ESALQ_3099	96.47	680	24	0	1	680	1	680	0	1359
MROB_602	ESALQ_3100	99.11	559	5	0	1	559	1	559	0	1143
MROB_603	ESALQ_3101	97.75	754	17	0	1	754	1	754	0	1516
MROB_604	ESALQ_3102	69.64	1759	288	13	94	1724	27	1667	0	2302
MROB_605	ESALQ_3104	99.40	995	4	1	1	993	1	995	0	2019
MROB_606	ESALQ_3105	99.71	345	1	0	1	345	1	345	0	660
MROB_607	ESALQ_3106	99.69	2552	6	1	1	2550	1	2552	0	5282
MROB_609	ESALQ_3108	99.82	548	1	0	1	548	1	548	0	1143
MROB_610	ESALQ_3109	99.75	401	1	0	1	401	1	401	0	804
MROB_612	ESALQ_3111	96.98	265	8	0	1	265	1	265	0	528
MROB_613	ESALQ_3112	99.51	408	2	0	1	408	1	408	0	850
MROB_614	ESALQ_3113	98.90	456	5	0	1	456	1	456	0	948
MROB_615	ESALQ_3114	98.99	296	3	0	1	296	1	296	0	592
MROB_617	ESALQ_3115	96.05	683	19	1	1	683	1	675	0	1362
MROB_618	ESALQ_3116	83.28	598	48	1	1	546	1	598	0	1002
MROB_619	ESALQ_3117	86.26	342	19	2	1	314	1	342	0	585
MROB_620	ESALQ_3118	92.58	364	12	1	1	364	1	349	0	683
MROB_621	ESALQ_3119	92.54	697	36	4	1	682	1	696	0	1268
MROB_622	ESALQ_3120	93.66	284	14	1	1	284	876	1155	0	547
MROB_623	ESALQ_3120	98.75	801	10	0	1	801	1	801	0	1623
MROB_624	ESALQ_3121	99.08	326	3	0	1	326	1	326	0	661
MROB_625	ESALQ_3122	99.82	569	1	0	1	569	1	569	0	1159
MROB_627	ESALQ_3124	97.97	344	7	0	1	344	1	344	0	697
MROB_628	ESALQ_3125	95.56	315	14	0	1	315	1	315	0	622
MROB_629	ESALQ_3126	97.46	473	12	0	1	473	1	473	0	956
MROB_633	ESALQ_3130	99.05	317	3	0	1	317	1	317	0	648
MROB_635	ESALQ_3132	97.87	423	9	0	1	423	1	423	0	853
MROB_636	ESALQ_3134	99.45	549	3	0	1	549	1	549	0	1129
MROB_638	ESALQ_3136	99.11	451	4	0	1	451	1	451	0	922
MROB_639	ESALQ_3137	95.62	1005	14	1	90	1064	1	1005	0	1948
MROB_640	ESALQ_3138	98.58	1057	13	2	5	1060	115	1170	0	2130
MROB_642	ESALQ_3140	94.75	591	4	1	1	564	1	591	0	1136
MROB_643	ESALQ_3141	99.85	652	1	0	30	681	30	681	0	1364
MROB_644	ESALQ_3142	97.09	447	13	0	1	447	1	447	0	901
MROB_645	ESALQ_3143	99.56	455	2	0	1	455	1	455	0	931
MROB_646	ESALQ_3144	99.13	343	3	0	1	343	1	343	0	704
MROB_647	ESALQ_3145	97.26	474	12	1	1	474	1	473	0	943
MROB_648	ESALQ_3146	99.65	576	2	0	1	576	1	576	0	1200
MROB_649	ESALQ_3147	100.00	332	0	0	1	332	1	332	0	668
MROB_651	ESALQ_3149	99.77	437	1	0	1	437	1	437	0	881
MROB_653	ESALQ_3150	99.06	748	7	0	1	748	1	748	0	1505
MROB_654	ESALQ_3151	99.01	404	4	0	1	404	1	404	0	829
MROB_655	ESALQ_3152	99.09	662	6	0	1	662	20	681	0	1359
MROB_656	ESALQ_3153	94.12	595	21	3	1	586	1	590	0	1125
MROB_657	ESALQ_3154	100.00	704	0	0	1	704	1	704	0	1353
MROB_659	ESALQ_3156	99.10	555	5	0	1	555	1	555	0	1127
MROB_660	ESALQ_3157	99.87	754	1	0	1	754	1	754	0	1567
MROB_663	ESALQ_3160	98.44	448	7	0	5	452	3	450	0	917
MROB_665	ESALQ_3161	97.11	415	11	1	1	414	1	415	0	800
MROB_666	ESALQ_3162	99.70	335	1	0	1	335	1	335	0	693
MROB_667	ESALQ_3163	96.14	673	12	1	1	659	1	673	0	1316
MROB_668	ESALQ_3164	99.31	1727	11	1	1	1726	1	1727	0	3519
MROB_669	ESALQ_3165	99.52	619	3	0	1	619	1	619	0	1228
MROB_671	ESALQ_3167	97.79	544	12	0	1	544	1	544	0	1090
MROB_672	ESALQ_3168	98.93	374	4	0	1	374	1	374	0	743
MROB_675	ESALQ_3171	100.00	504	0	0	1	504	1	504	0	1036
MROB_676	ESALQ_3172	95.81	668	27	1	1	667	1	668	0	1274
MROB_677	ESALQ_3173	99.14	350	3	0	1	350	1	350	0	722
MROB_678	ESALQ_3174	99.00	1495	15	0	1	1495	1	1495	0	3047
MROB_679	ESALQ_3177	96.00	375	15	0	290	664	1	375	0	738
MROB_682	ESALQ_3180	100.00	456	0	0	1	456	1	456	0	931
MROB_683	ESALQ_3181	99.49	395	2	0	1	395	1	395	0	820
MROB_685	ESALQ_3183	92.41	580	14	1	7	556	1	580	0	1088
MROB_686	ESALQ_3184	98.09	262	5	0	1	262	1	262	0	519
MROB_687	ESALQ_3185	98.60	572	8	0	1	572	1	572	0	1177
MROB_688	ESALQ_3186	96.24	719	25	1	1	719	1	717	0	1339
MROB_689	ESALQ_3187	96.91	486	15	0	1	486	1	486	0	959
MROB_690	ESALQ_3188	99.02	711	7	0	1	711	1	711	0	1450
MROB_691	ESALQ_3189	98.24	569	6	1	1	565	1	569	0	1138
MROB_693	ESALQ_3192	96.98	497	10	1	1	492	1	497	0	988
MROB_695	ESALQ_3193	99.37	1437	9	0	1	1437	1	1437	0	2867
MROB_696	ESALQ_3194	96.57	757	13	3	1	749	1	752	0	1484
MROB_698	ESALQ_3196	99.38	325	2	0	1	325	1	325	0	662
MROB_699	ESALQ_3197	99.76	411	1	0	1	411	1	411	0	796
MROB_700	ESALQ_3198	98.10	1472	14	2	1	1458	1	1472	0	2861
MROB_701	ESALQ_3200	99.16	836	7	0	346	1181	9	844	0	1669
MROB_703	ESALQ_3202	97.83	830	18	0	1	830	1	830	0	1657
MROB_704	ESALQ_3203	99.61	517	2	0	1	517	1	517	0	1070
MROB_705	ESALQ_3204	97.36	833	22	0	1	833	1	833	0	1572
MROB_706	ESALQ_3205	98.76	566	7	0	1	566	1	566	0	1155
MROB_707	ESALQ_3206	97.78	902	18	1	5	906	104	1003	0	1791
MROB_708	ESALQ_3207	99.14	579	5	0	1	579	1	579	0	1190
MROB_710	ESALQ_3209	100.00	362	0	0	1	362	1	362	0	752
MROB_711	ESALQ_3210	100.00	581	0	0	1	581	1	581	0	1199
MROB_712	ESALQ_3211	91.45	421	7	1	1	392	1	421	0	761
MROB_713	ESALQ_3212	98.82	340	4	0	1	340	1	340	0	690
MROB_714	ESALQ_3213	98.59	284	4	0	1	284	1	284	0	566
MROB_716	ESALQ_3215	99.59	2178	9	0	1	2178	1	2178	0	4531
MROB_717	ESALQ_3216	98.55	621	9	0	1	621	1	621	0	1274
MROB_718	ESALQ_3217	97.25	909	20	1	1	909	1	904	0	1821
MROB_719	ESALQ_3218	98.47	655	9	1	1	654	1	655	0	1281
MROB_721	ESALQ_3220	97.05	576	7	1	1	576	1	566	0	1097
MROB_722	ESALQ_3221	99.81	530	1	0	1	530	1	530	0	1103
MROB_723	ESALQ_3222	97.84	972	6	1	1	957	1	972	0	1950
MROB_724	ESALQ_3223	99.21	382	3	0	1	382	1	382	0	791
MROB_726	ESALQ_3225	99.63	537	2	0	591	1127	591	1127	0	1097
MROB_727	ESALQ_3226	99.77	439	1	0	1	439	1	439	0	918
MROB_728	ESALQ_3227	99.59	1957	8	0	1	1957	1	1957	0	4020
MROB_729	ESALQ_3228	98.61	1295	18	0	1	1295	1	1295	0	2576
MROB_731	ESALQ_3230	97.87	610	13	0	1	610	1	610	0	1238
MROB_732	ESALQ_3231	97.75	622	11	1	3	621	1	622	0	1252
MROB_733	ESALQ_3232	99.61	516	2	0	1	516	1	516	0	1071
MROB_735	ESALQ_3233	99.63	270	1	0	1	270	1	270	0	541
MROB_736	ESALQ_3235	99.33	298	2	0	1	298	1	298	0	619
MROB_737	ESALQ_3236	99.53	644	3	0	1	644	1	644	0	1333
MROB_739	ESALQ_3238	94.92	492	21	2	1	492	1	488	0	936
MROB_740	ESALQ_3239	89.76	332	18	1	1	332	1	316	0	581
MROB_741	ESALQ_3240	99.45	1283	6	1	1	1283	1	1282	0	2655
MROB_742	ESALQ_3241	95.10	1001	12	1	1	1001	1	964	0	1933
MROB_743	ESALQ_3242	97.41	656	17	0	1	656	1	656	0	1334
MROB_745	ESALQ_3244	91.18	374	4	2	1	374	1	345	0	680
MROB_746	ESALQ_3245	97.72	1709	32	3	1	1706	1	1705	0	3244
MROB_748	ESALQ_3247	99.15	354	3	0	156	509	1	354	0	726
MROB_749	ESALQ_3248	100.00	311	0	0	1	311	1	311	0	644
MROB_750	ESALQ_3249	99.23	392	3	0	1	392	1	392	0	818
MROB_751	ESALQ_3250	98.69	306	4	0	1	306	1	306	0	601
MROB_752	ESALQ_3252	99.62	261	1	0	1	261	1	261	0	528
MROB_753	ESALQ_3253	99.14	581	5	0	1	581	1	581	0	1199
MROB_754	ESALQ_3254	99.45	547	3	0	1	547	1	547	0	1138
MROB_755	ESALQ_3255	98.09	367	7	0	1	367	1	367	0	740
MROB_757	ESALQ_3257	99.63	267	1	0	1	267	1	267	0	551
MROB_758	ESALQ_3258	99.22	516	4	0	1	516	1	516	0	1064
MROB_759	ESALQ_3259	98.99	691	7	0	1	691	1	691	0	1415
MROB_760	ESALQ_3260	99.52	420	2	0	1	420	1	420	0	863
MROB_761	ESALQ_3261	99.69	979	3	0	1	979	1	979	0	2016
MROB_762	ESALQ_3262	96.06	482	2	1	106	587	1	465	0	946
MROB_763	ESALQ_3263	100.00	294	0	0	1	294	1	294	0	591
MROB_765	ESALQ_3265	98.67	751	10	0	1	751	1	751	0	1525
MROB_766	ESALQ_3266	99.02	614	5	1	2	614	201	814	0	1275
MROB_768	ESALQ_3267	99.72	1424	4	0	1	1424	1	1424	0	2927
MROB_770	ESALQ_3270	99.29	985	7	0	1	985	1	985	0	1998
MROB_771	ESALQ_3271	99.70	994	3	0	1	994	1	994	0	2075
MROB_773	ESALQ_3273	99.46	926	5	0	1	926	1	926	0	1923
MROB_774	ESALQ_3274	99.26	543	4	0	1	543	1	543	0	1094
MROB_775	ESALQ_3275	99.22	1279	10	0	1	1279	1	1279	0	2607
MROB_776	ESALQ_3276	99.85	689	1	0	1	689	1	689	0	1432
MROB_777	ESALQ_3277	99.59	483	2	0	1	483	1	483	0	984
MROB_778	ESALQ_3278	99.28	554	4	0	23	576	121	674	0	1154
MROB_780	ESALQ_3279	97.84	695	14	1	1	695	1	694	0	1396
MROB_781	ESALQ_3280	97.42	426	11	0	1	426	1	426	0	800
MROB_785	ESALQ_3283	99.78	455	1	0	139	593	1	455	0	939
MROB_786	ESALQ_3284	100.00	412	0	0	1	412	1	412	0	863
MROB_788	ESALQ_3286	99.88	850	1	0	1	850	1	850	0	1670
MROB_789	ESALQ_3287	99.63	273	1	0	87	359	310	582	0	565
MROB_790	ESALQ_3288	99.79	481	1	0	1	481	1	481	0	999
MROB_791	ESALQ_3289	98.18	1153	21	0	1	1153	1	1153	0	2283
MROB_792	ESALQ_3290	87.92	298	3	1	1	298	1	265	0	524
MROB_793	ESALQ_3291	93.75	1263	37	3	4	1266	41	1261	0	2420
MROB_794	ESALQ_3292	93.03	975	65	2	1	974	1	973	0	1451
MROB_795	ESALQ_3293	99.78	464	1	0	1	464	1	464	0	962
MROB_796	ESALQ_3294	98.84	604	7	0	1	604	1	604	0	1236
MROB_797	ESALQ_3295	96.57	787	9	1	1	787	1	769	0	1564
MROB_798	ESALQ_3296	96.55	261	9	0	1	261	1	261	0	538
MROB_799	ESALQ_3297	99.68	314	1	0	1	314	1	314	0	642
MROB_800	ESALQ_3298	98.99	796	8	0	1	796	1	796	0	1619
MROB_801	ESALQ_3299	99.64	278	1	0	1	278	1	278	0	558
MROB_802	ESALQ_3300	99.10	1001	9	0	1	1001	1	1001	0	2063
MROB_803	ESALQ_3301	99.59	1724	7	0	1	1724	1	1724	0	3507
MROB_804	ESALQ_3302	99.87	770	1	0	1	770	1	770	0	1614
MROB_805	ESALQ_3303	100.00	678	0	0	1	678	1	678	0	1391
MROB_806	ESALQ_3304	98.95	1422	15	0	1	1422	1	1422	0	2918
MROB_808	ESALQ_3306	99.27	275	2	0	1	275	1	275	0	543
MROB_809	ESALQ_3307	98.12	373	6	1	1	372	1	373	0	746
MROB_811	ESALQ_3309	100.00	749	0	0	1	749	1	749	0	1538
MROB_812	ESALQ_3310	98.02	858	17	0	1	858	1	858	0	1723
MROB_814	ESALQ_3312	98.76	403	5	0	1	403	1	403	0	813
MROB_815	ESALQ_3313	93.21	1826	55	4	1	1826	1	1757	0	3470
MROB_816	ESALQ_3314	99.17	842	7	0	1	842	1	842	0	1743
MROB_817	ESALQ_3315	96.55	666	23	0	1	666	1	666	0	1280
MROB_818	ESALQ_3316	98.97	484	5	0	1	484	1	484	0	991
MROB_819	ESALQ_3317	87.56	587	50	2	1	565	1	586	0	983
MROB_820	ESALQ_3318	99.49	583	3	0	1	583	1	583	0	1194
MROB_822	ESALQ_3320	98.64	808	11	0	96	903	13	820	0	1677
MROB_823	ESALQ_3322	87.43	1018	87	7	1	993	1	1002	0	1674
MROB_824	ESALQ_3323	99.41	673	4	0	1	673	1	673	0	1365
MROB_826	ESALQ_3325	98.48	461	7	0	263	723	187	647	0	937
MROB_827	ESALQ_3326	99.34	452	3	0	1	452	1	452	0	906
MROB_828	ESALQ_3327	99.41	847	5	0	1	847	1	847	0	1750
MROB_830	ESALQ_3329	95.37	410	15	1	1	410	1	406	0	795
MROB_831	ESALQ_3330	99.03	514	4	1	1	513	1	514	0	1044
MROB_832	ESALQ_3331	98.16	490	8	1	1	489	1	490	0	998
MROB_833	ESALQ_3332	99.30	711	5	0	78	788	1	711	0	1451
MROB_834	ESALQ_3333	99.14	582	5	0	1	582	1	582	0	1176
MROB_836	ESALQ_3335	98.07	259	5	0	1	259	1	259	0	524
MROB_837	ESALQ_3336	97.41	348	9	0	1	348	1	348	0	710
MROB_842	ESALQ_3341	99.11	563	5	0	1	563	1	563	0	1154
MROB_843	ESALQ_3342	95.94	345	14	0	196	540	1	345	0	684
MROB_845	ESALQ_3344	97.67	386	9	0	1	386	1	386	0	782
MROB_846	ESALQ_3345	97.68	775	16	1	319	1093	73	845	0	1568
MROB_847	ESALQ_3346	93.51	616	3	1	81	659	1	616	0	1128
MROB_848	ESALQ_3347	100.00	684	0	0	1	684	1	684	0	1367
MROB_849	ESALQ_3348	97.89	426	9	0	1	426	1	426	0	852
MROB_850	ESALQ_3349	97.15	597	15	1	1	595	1	597	0	1156
MROB_851	ESALQ_3350	99.07	648	6	0	1	648	1	648	0	1324
MROB_852	ESALQ_3351	96.33	436	10	1	1	436	1	430	0	832
MROB_853	ESALQ_3352	97.99	1045	19	1	1	1045	1	1043	0	2108
MROB_854	ESALQ_3353	99.41	341	2	0	1	341	1	341	0	697
MROB_855	ESALQ_3354	99.72	351	1	0	1	351	1	351	0	723
MROB_856	ESALQ_3355	91.09	561	42	1	1	553	1	561	0	885
MROB_859	ESALQ_3357	98.25	456	8	0	1	456	1	456	0	927
MROB_860	ESALQ_3358	99.81	519	1	0	1	519	1	519	0	1061
MROB_861	ESALQ_3359	96.14	1115	43	0	1	1115	1	1115	0	2224
MROB_862	ESALQ_3360	99.52	1258	6	0	1	1258	1	1258	0	2589
MROB_863	ESALQ_3361	92.74	303	4	1	1	303	1	285	0	576
MROB_865	ESALQ_3363	98.94	564	3	1	1	561	1	564	0	1149
MROB_866	ESALQ_3364	98.60	1286	18	0	1	1286	1	1286	0	2494
MROB_867	ESALQ_3365	99.55	442	2	0	1	442	1	442	0	896
MROB_869	ESALQ_3367	98.37	491	8	0	1	491	1	491	0	1002
MROB_870	ESALQ_3368	85.61	549	38	2	1	539	1	518	0	650
MROB_871	ESALQ_3370	98.85	522	6	0	179	700	1	522	0	1067
MROB_872	ESALQ_3371	100.00	351	0	0	1	351	1	351	0	708
MROB_873	ESALQ_3372	99.57	699	2	1	1	698	1	699	0	1451
MROB_875	ESALQ_3374	98.86	881	10	0	1	881	1	881	0	1773
MROB_877	ESALQ_3376	98.57	631	9	0	1	631	1	631	0	1299
MROB_879	ESALQ_3378	98.75	320	4	0	1	320	1	320	0	665
MROB_880	ESALQ_3379	99.52	1241	6	0	1	1241	1	1241	0	2565
MROB_881	ESALQ_3380	99.78	452	1	0	40	491	1	452	0	946
MROB_883	ESALQ_3382	99.79	945	2	0	1	945	1	945	0	1949
MROB_884	ESALQ_3383	100.00	339	0	0	1	339	1	339	0	708
MROB_885	ESALQ_3384	99.27	275	2	0	1	275	1	275	0	560
MROB_888	ESALQ_3387	99.10	778	7	0	1	778	1	778	0	1602
MROB_890	ESALQ_3388	94.31	615	35	0	1	615	1	615	0	1199
MROB_891	ESALQ_3389	98.25	1141	20	0	1	1141	1	1141	0	2280
MROB_892	ESALQ_3390	98.03	254	5	0	1	254	1	254	0	517
MROB_893	ESALQ_3391	99.77	430	1	0	1	430	1	430	0	865
MROB_895	ESALQ_3393	98.72	861	11	0	1	861	1	861	0	1755
MROB_896	ESALQ_3394	100.00	499	0	0	1	499	1	499	0	1023
MROB_897	ESALQ_3395	99.77	444	1	0	1	444	1	444	0	921
MROB_898	ESALQ_3396	99.47	757	4	0	1	757	1	757	0	1540
MROB_899	ESALQ_3397	99.37	319	2	0	1	319	1	319	0	645
MROB_900	ESALQ_3398	99.81	520	1	0	1	520	1	520	0	1077
MROB_901	ESALQ_3399	100.00	272	0	0	222	493	1	272	0	565
MROB_902	ESALQ_3400	97.91	909	11	2	1	901	1	909	0	1852
MROB_903	ESALQ_3401	98.96	672	7	0	1	672	1	672	0	1358
MROB_904	ESALQ_3402	99.38	809	5	0	1	809	1	809	0	1642
MROB_906	ESALQ_3404	97.61	545	13	0	1	545	1	545	0	1069
MROB_907	ESALQ_3405	99.66	595	2	0	1	595	1	595	0	1238
MROB_908	ESALQ_3406	99.65	282	1	0	1	282	1	282	0	585
MROB_909	ESALQ_3407	99.40	496	3	0	1	496	1	496	0	1021
MROB_910	ESALQ_3408	99.61	255	1	0	1	255	1	255	0	527
MROB_911	ESALQ_3409	97.79	544	12	0	1	544	1	544	0	1110
MROB_914	ESALQ_3412	99.53	430	2	0	1	430	1	430	0	868
MROB_915	ESALQ_3413	98.87	617	7	0	1	617	1	617	0	1259
MROB_916	ESALQ_3414	98.91	368	4	0	1	368	1	368	0	762
MROB_917	ESALQ_3415	99.44	888	5	0	1	888	1	888	0	1775
MROB_918	ESALQ_3416	98.70	308	4	0	1	308	1	308	0	625
MROB_919	ESALQ_3417	98.60	285	4	0	1	285	1	285	0	581
MROB_920	ESALQ_3418	98.66	447	6	0	1	447	1	447	0	905
MROB_921	ESALQ_3419	99.50	807	4	0	1	807	1	807	0	1669
MROB_922	ESALQ_3420	99.60	251	1	0	1	251	1	251	0	526
MROB_923	ESALQ_3421	99.47	375	2	0	1	375	1	375	0	781
MROB_924	ESALQ_3422	99.74	382	1	0	1	382	1	382	0	777
MROB_925	ESALQ_3423	85.66	509	44	5	7	508	48	534	0	856
MROB_926	ESALQ_3424	99.80	498	1	0	1	498	1	498	0	1030
MROB_927	ESALQ_3425	99.85	1939	3	0	1	1939	1	1939	0	4021
MROB_928	ESALQ_3426	96.87	638	20	0	1	638	1	638	0	1265
MROB_930	ESALQ_3427	97.90	1002	21	0	1	1002	1	1002	0	2020
MROB_931	ESALQ_3428	99.71	1028	3	0	1	1028	1	1028	0	2127
MROB_932	ESALQ_3429	99.73	367	1	0	132	498	1	367	0	738
MROB_933	ESALQ_3430	98.52	271	4	0	13	283	208	478	0	556
MROB_934	ESALQ_3431	99.75	785	2	0	1	785	1	785	0	1623
MROB_937	ESALQ_3434	98.91	459	5	0	148	606	1	459	0	956
MROB_939	ESALQ_3436	99.33	1347	9	0	1	1347	1	1347	0	2759
MROB_940	ESALQ_3437	99.92	1185	1	0	1	1185	1	1185	0	2470
MROB_941	ESALQ_3438	100.00	278	0	0	19	296	1	278	0	568
MROB_942	ESALQ_3439	99.01	912	9	0	1	912	1	912	0	1843
MROB_943	ESALQ_3440	99.47	562	3	0	2	563	94	655	0	1159
MROB_944	ESALQ_3441	98.26	632	11	0	1	632	1	632	0	1287
MROB_948	ESALQ_3445	99.33	299	2	0	1	299	1	299	0	580
MROB_949	ESALQ_3446	99.73	364	1	0	1	364	1	364	0	734
MROB_950	ESALQ_3447	99.71	344	1	0	1	344	1	344	0	719
MROB_951	ESALQ_3448	100.00	267	0	0	1	267	1	267	0	550
MROB_952	ESALQ_3449	99.62	265	1	0	1	265	1	265	0	539
MROB_953	ESALQ_3450	99.28	419	3	0	1	419	1	419	0	851
MROB_954	ESALQ_3451	98.43	572	9	0	23	594	41	612	0	1167
MROB_955	ESALQ_3452	99.61	515	2	0	1	515	1	515	0	1053
MROB_958	ESALQ_3455	99.66	296	1	0	1	296	15	310	0	616
MROB_959	ESALQ_3456	99.64	1383	5	0	1	1383	1	1383	0	2833
MROB_960	ESALQ_3457	87.42	445	21	3	1	437	1	418	0	742
MROB_962	ESALQ_3460	98.93	563	4	1	1	563	1	561	0	1147
MROB_964	ESALQ_3463	100.00	374	0	0	1	374	1	374	0	757
MROB_965	ESALQ_162	98.85	523	6	0	1	523	1	523	0	1062
MROB_968	ESALQ_165	99.79	959	2	0	1	959	1	959	0	1882
MROB_969	ESALQ_166	100.00	1067	0	0	1	1067	1	1067	0	2212
MROB_971	ESALQ_168	92.42	462	3	1	1	430	1	462	0	804
MROB_972	ESALQ_169	99.15	589	5	0	143	731	1	589	0	1196
MROB_973	ESALQ_170	98.79	1154	13	1	1	1154	1	1153	0	2320
MROB_974	ESALQ_171	99.81	1074	2	0	1	1074	1	1074	0	2167
MROB_978	ESALQ_175	98.25	513	9	0	1	513	1	513	0	1033
MROB_979	ESALQ_176	95.30	298	8	1	1	292	1	298	0	520
MROB_980	ESALQ_177	97.83	322	1	1	1	322	1	316	0	653
MROB_981	ESALQ_179	99.42	684	4	0	1	684	1	684	0	1407
MROB_982	ESALQ_180	98.21	672	11	1	1	672	1	671	0	1337
MROB_983	ESALQ_181	99.31	578	4	0	1	578	1	578	0	1173
MROB_985	ESALQ_183	98.23	452	8	0	1	452	1	452	0	897
MROB_986	ESALQ_185	96.53	317	7	1	1	317	1	313	0	627
MROB_989	ESALQ_187	98.79	994	8	1	1	994	1	990	0	2023
MROB_991	ESALQ_189	90.88	713	10	2	1	658	1	713	0	1297
MROB_993	ESALQ_190	98.99	1188	7	1	1	1188	1	1183	0	2389
MROB_995	ESALQ_192	97.02	369	11	0	1	369	1	369	0	667
MROB_997	ESALQ_195	99.60	992	4	0	1	992	1	992	0	1999
MROB_999	ESALQ_196	99.69	635	2	0	1	635	1	635	0	1303
MROB_1001	ESALQ_198	98.58	703	10	0	1	703	1	703	0	1436
MROB_1002	ESALQ_199	98.18	661	12	0	1	661	1	661	0	1334
MROB_1003	ESALQ_200	99.56	906	4	0	1	906	1	906	0	1840
MROB_1004	ESALQ_201	97.80	1182	26	0	1	1182	1	1182	0	2394
MROB_1006	ESALQ_203	100.00	334	0	0	1	334	1	334	0	686
MROB_1007	ESALQ_204	99.08	867	8	0	1	867	1	867	0	1795
MROB_1008	ESALQ_205	98.47	852	10	1	1	849	1	852	0	1666
MROB_1010	ESALQ_207	89.15	516	13	2	68	540	7	522	0	916
MROB_1011	ESALQ_208	98.76	1127	14	0	1	1127	1	1127	0	2321
MROB_1012	ESALQ_209	99.39	329	2	0	1	329	1	329	0	669
MROB_1014	ESALQ_211	98.90	545	5	1	1	545	1	544	0	1099
MROB_1015	ESALQ_212	98.98	394	4	0	1	394	1	394	0	794
MROB_1017	ESALQ_214	100.00	456	0	0	1	456	1	456	0	930
MROB_1018	ESALQ_215	99.18	612	5	0	1	612	1	612	0	1246
MROB_1019	ESALQ_216	99.36	311	2	0	1	311	1	311	0	640
MROB_1020	ESALQ_217	98.84	259	3	0	1	259	58	316	0	529
MROB_1021	ESALQ_218	99.66	597	2	0	1	597	1	597	0	1197
MROB_1022	ESALQ_219	99.09	769	7	0	1	769	1	769	0	1546
MROB_1025	ESALQ_221	99.80	503	1	0	1	503	1	503	0	1050
MROB_1028	ESALQ_224	93.13	801	33	2	1	801	1	779	0	1470
MROB_1031	ESALQ_228	97.71	480	9	1	1	478	1	480	0	947
MROB_1032	ESALQ_228	98.53	340	5	0	1	340	481	820	0	700
MROB_1033	ESALQ_229	91.92	1003	52	2	1	999	1	978	0	1792
MROB_1034	ESALQ_230	93.75	304	9	1	1	304	1	294	0	579
MROB_1035	ESALQ_231	99.51	409	2	0	1	409	1	409	0	833
MROB_1037	ESALQ_233	98.09	996	19	0	1	996	1	996	0	1982
MROB_1039	ESALQ_235	99.79	486	1	0	1	486	1	486	0	930
MROB_1040	ESALQ_236	99.81	529	1	0	1	529	1	529	0	1058
MROB_1041	ESALQ_237	96.50	457	14	1	1	455	1	457	0	855
MROB_1042	ESALQ_238	95.36	280	13	0	1	280	1	280	0	541
MROB_1043	ESALQ_239	99.81	529	1	0	1	529	1	529	0	1078
MROB_1044	ESALQ_240	95.72	304	4	1	1	295	1	304	0	601
MROB_1045	ESALQ_241	99.11	448	4	0	148	595	1	448	0	931
MROB_1046	ESALQ_242	98.99	398	4	0	1	398	1	398	0	808
MROB_1047	ESALQ_243	99.27	411	3	0	1	411	1	411	0	837
MROB_1048	ESALQ_245	98.67	376	5	0	1	376	1	376	0	761
MROB_1049	ESALQ_246	97.16	668	19	0	1	668	1	668	0	1359
MROB_1050	ESALQ_247	99.16	357	3	0	1	357	1	357	0	738
MROB_1052	ESALQ_248	99.49	588	3	0	1	588	1	588	0	1199
MROB_1053	ESALQ_249	100.00	342	0	0	1	342	1	342	0	714
MROB_1055	ESALQ_251	96.18	1596	16	1	1	1596	1	1551	0	3154
MROB_1057	ESALQ_253	99.28	559	3	1	1	558	1	559	0	1129
MROB_1058	ESALQ_254	99.75	401	1	0	1	401	1	401	0	825
MROB_1059	ESALQ_255	97.18	1065	21	2	1	1063	1	1058	0	2125
MROB_1060	ESALQ_256	95.64	505	22	0	1	505	1	505	0	993
MROB_1062	ESALQ_257	98.68	757	10	0	1	757	1	757	0	1566
MROB_1063	ESALQ_258	87.21	438	11	3	182	574	1	438	0	763
MROB_1064	ESALQ_259	99.64	826	3	0	1	826	1	826	0	1675
MROB_1065	ESALQ_260	99.21	381	1	1	1	379	1	381	0	704
MROB_1066	ESALQ_261	99.82	561	1	0	1	561	1	561	0	1152
MROB_1067	ESALQ_263	100.00	2432	0	0	1	2432	1	2432	0	5024
MROB_1068	ESALQ_264	98.14	269	5	0	1	269	1	269	0	540
MROB_1069	ESALQ_265	99.86	705	1	0	1	705	1	705	0	1466
MROB_1071	ESALQ_266	84.69	320	38	1	1	309	1	320	0	539
MROB_1072	ESALQ_267	99.12	452	4	0	1	452	1	452	0	920
MROB_1074	ESALQ_269	100.00	468	0	0	1	468	1	468	0	972
MROB_1075	ESALQ_270	99.56	899	4	0	1	899	1	899	0	1852
MROB_1076	ESALQ_271	99.63	544	2	0	1	544	1	544	0	1052
MROB_1077	ESALQ_272	95.33	836	17	1	1	836	1	814	0	1609
MROB_1078	ESALQ_273	93.65	551	12	1	1	551	1	528	0	1019
MROB_1079	ESALQ_274	100.00	421	0	0	1	421	1	421	0	868
MROB_1080	ESALQ_275	100.00	265	0	0	1	265	1	265	0	551
MROB_1081	ESALQ_276	98.86	527	6	0	1	527	1	527	0	1045
MROB_1082	ESALQ_277	99.40	1509	9	0	1	1509	1	1509	0	3131
MROB_1083	ESALQ_278	86.93	436	51	3	1	431	1	435	0	749
MROB_1084	ESALQ_279	99.02	1019	10	0	1	1019	1	1019	0	2026
MROB_1086	ESALQ_281	98.36	733	12	0	2	734	8	740	0	1494
MROB_1087	ESALQ_282	99.29	421	3	0	1	421	1	421	0	791
MROB_1088	ESALQ_283	98.79	577	6	1	1	577	1	576	0	1159
MROB_1090	ESALQ_285	98.25	1142	20	0	1	1142	1	1142	0	2253
MROB_1091	ESALQ_286	97.43	662	16	1	66	727	179	839	0	974
MROB_1094	ESALQ_289	99.30	431	3	0	59	489	4	434	0	880
MROB_1096	ESALQ_291	97.04	540	8	2	1	540	1	532	0	1033
MROB_1097	ESALQ_292	98.27	405	7	0	1	405	1	405	0	812
MROB_1098	ESALQ_293	98.85	1830	2	1	20	1830	2	1831	0	3738
MROB_1099	ESALQ_294	88.29	427	27	1	1	404	1	427	0	723
MROB_1100	ESALQ_295	99.50	400	2	0	1	400	1	400	0	825
MROB_1102	ESALQ_297	99.76	415	1	0	1	415	1	415	0	851
MROB_1104	ESALQ_299	93.80	274	17	0	247	520	15	288	0	521
MROB_1105	ESALQ_300	99.33	299	2	0	1	299	1	299	0	620
MROB_1106	ESALQ_301	99.07	428	4	0	1	428	1	428	0	809
MROB_1107	ESALQ_302	99.54	435	2	0	1	435	1	435	0	842
MROB_1109	ESALQ_304	99.72	353	1	0	1	353	1	353	0	716
MROB_1110	ESALQ_305	96.18	288	11	0	124	411	1	288	0	546
MROB_1111	ESALQ_307	97.91	669	14	0	1	669	1	669	0	1356
MROB_1113	ESALQ_309	97.19	675	17	1	1	675	1	673	0	1332
MROB_1114	ESALQ_310	98.99	296	3	0	1	296	1	296	0	599
MROB_1115	ESALQ_311	99.29	283	2	0	1	283	1	283	0	565
MROB_1116	ESALQ_312	98.19	277	5	0	11	287	131	407	0	558
MROB_1117	ESALQ_313	99.46	372	2	0	1	372	1	372	0	766
MROB_1119	ESALQ_313	86.86	411	50	3	1	408	436	845	0	669
MROB_1120	ESALQ_314	99.40	666	4	0	129	794	99	764	0	1352
MROB_1124	ESALQ_317	98.76	644	8	0	1	644	1	644	0	1272
MROB_1126	ESALQ_319	98.03	457	9	0	1	457	1	457	0	931
MROB_1128	ESALQ_322	93.96	298	18	0	211	508	3	300	0	568
MROB_1129	ESALQ_323	99.46	556	3	0	1	556	1	556	0	1121
MROB_1130	ESALQ_324	98.61	361	5	0	1	361	1	361	0	736
MROB_1131	ESALQ_325	100.00	515	0	0	1	515	1	515	0	1053
MROB_1132	ESALQ_326	89.30	486	3	1	1	437	1	486	0	884
MROB_1133	ESALQ_327	99.02	612	6	0	117	728	35	646	0	1249
MROB_1134	ESALQ_328	98.68	529	7	0	1	529	1	529	0	1103
MROB_1135	ESALQ_328	96.21	1109	25	1	14	1105	534	1642	0	2196
MROB_1136	ESALQ_329	94.77	497	19	2	1	496	1	491	0	949
MROB_1138	ESALQ_331	98.32	476	3	1	1	471	1	476	0	951
MROB_1139	ESALQ_332	99.42	686	4	0	1	686	1	686	0	1370
MROB_1142	ESALQ_335	99.37	316	2	0	1	316	1	316	0	627
MROB_1144	ESALQ_337	89.13	515	3	1	1	462	1	515	0	918
MROB_1145	ESALQ_338	97.07	375	11	0	1	375	1	375	0	754
MROB_1146	ESALQ_339	95.60	613	26	1	1	613	1	612	0	1216
MROB_1150	ESALQ_343	99.50	402	2	0	1	402	1	402	0	775
MROB_1152	ESALQ_344	98.31	296	5	0	1	296	1	296	0	561
MROB_1153	ESALQ_345	98.93	468	5	0	1	468	1	468	0	964
MROB_1154	ESALQ_346	89.04	511	7	1	46	507	1	511	0	829
MROB_1155	ESALQ_347	97.59	290	7	0	131	420	1	290	0	595
MROB_1156	ESALQ_348	99.59	488	2	0	1	488	1	488	0	1008
MROB_1157	ESALQ_349	95.06	769	38	0	1	769	1	769	0	1510
MROB_1158	ESALQ_350	95.67	439	13	2	1	439	1	433	0	769
MROB_1160	ESALQ_352	99.64	275	1	0	1	275	1	275	0	561
MROB_1161	ESALQ_353	95.43	897	24	4	1	897	1	880	0	1658
MROB_1162	ESALQ_354	97.83	737	15	1	1	737	1	736	0	1481
MROB_1163	ESALQ_355	100.00	327	0	0	1	327	1	327	0	677
MROB_1164	ESALQ_356	92.04	553	44	0	1	553	1	553	0	848
MROB_1165	ESALQ_357	96.79	530	17	0	1	530	1	530	0	1068
MROB_1166	ESALQ_358	97.98	445	8	1	1	444	1	445	0	872
MROB_1168	ESALQ_360	98.80	333	4	0	1	333	1	333	0	665
MROB_1169	ESALQ_361	98.65	814	11	0	1	814	1	814	0	1624
MROB_1170	ESALQ_362	99.56	1607	7	0	1	1607	1	1607	0	3284
MROB_1171	ESALQ_363	99.39	1468	9	0	1	1468	1	1468	0	3007
MROB_1172	ESALQ_364	100.00	352	0	0	1	352	1	352	0	728
MROB_1173	ESALQ_365	99.18	736	3	1	1	733	40	775	0	1491
MROB_1175	ESALQ_367	94.44	1025	11	2	1	1025	1	979	0	1987
MROB_1176	ESALQ_368	100.00	343	0	0	1	343	1	343	0	661
MROB_1177	ESALQ_369	97.95	342	7	0	1	342	1	342	0	696
MROB_1178	ESALQ_370	95.42	720	31	1	1	720	1	718	0	1242
MROB_1179	ESALQ_371	98.16	706	9	1	1	706	1	702	0	1423
MROB_1180	ESALQ_372	97.89	663	1	1	1	650	1	663	0	1347
MROB_1181	ESALQ_373	99.81	525	1	0	1	525	1	525	0	1078
MROB_1182	ESALQ_374	88.61	527	20	2	1	487	1	527	0	934
MROB_1183	ESALQ_375	99.72	358	1	0	1	358	1	358	0	728
MROB_1184	ESALQ_376	100.00	262	0	0	1	262	1	262	0	528
MROB_1185	ESALQ_377	99.29	282	2	0	112	393	1	282	0	583
MROB_1186	ESALQ_378	98.91	1096	7	1	7	1097	1	1096	0	2149
MROB_1187	ESALQ_379	99.30	2144	14	1	1	2144	1	2143	0	4313
MROB_1189	ESALQ_381	99.82	552	1	0	1	552	1	552	0	1104
MROB_1190	ESALQ_382	99.67	302	1	0	1	302	1	302	0	619
MROB_1191	ESALQ_383	98.49	1592	24	0	1	1592	1	1592	0	3246
MROB_1192	ESALQ_384	99.15	944	5	1	1	944	1	941	0	1872
MROB_1193	ESALQ_385	99.05	629	6	0	171	799	1	629	0	1263
MROB_1194	ESALQ_386	97.77	1164	25	1	69	1232	33	1195	0	2352
MROB_1196	ESALQ_388	99.48	381	2	0	1	381	1	381	0	782
MROB_1197	ESALQ_389	94.64	485	9	2	1	482	1	471	0	923
MROB_1198	ESALQ_390	99.88	860	1	0	1	860	1	860	0	1770
MROB_1199	ESALQ_391	99.81	2141	4	0	1	2141	1	2141	0	4399
MROB_1200	ESALQ_392	98.72	312	4	0	1	312	1	312	0	632
MROB_1201	ESALQ_393	99.26	403	3	0	1	403	1	403	0	810
MROB_1202	ESALQ_394	94.91	393	17	1	1	393	1	390	0	674
MROB_1203	ESALQ_395	99.21	509	4	0	1	509	1	509	0	1022
MROB_1204	ESALQ_396	95.91	318	0	1	1	305	1	318	0	620
MROB_1206	ESALQ_398	99.73	375	1	0	1	375	1	375	0	772
MROB_1207	ESALQ_399	99.20	1127	9	0	1	1127	1	1127	0	2244
MROB_1208	ESALQ_400	98.69	1070	14	0	1	1070	1	1070	0	2159
MROB_1209	ESALQ_401	87.16	584	37	5	11	590	14	563	0	987
MROB_1210	ESALQ_403	99.66	290	1	0	1	290	1	290	0	591
MROB_1211	ESALQ_404	91.96	510	12	3	1	483	1	508	0	929
MROB_1212	ESALQ_405	98.08	364	7	0	1	364	1	364	0	747
MROB_1213	ESALQ_406	100.00	307	0	0	1	307	1	307	0	639
MROB_1214	ESALQ_407	99.19	493	3	1	514	1005	478	970	0	973
MROB_1216	ESALQ_409	99.33	300	2	0	1	300	1	300	0	616
MROB_1217	ESALQ_410	99.10	669	6	0	2	670	1	669	0	1373
MROB_1218	ESALQ_411	98.75	400	5	0	38	437	1	400	0	810
MROB_1220	ESALQ_413	97.04	372	11	0	1	372	1	372	0	749
MROB_1222	ESALQ_415	98.21	503	4	1	1	498	1	503	0	1023
MROB_1223	ESALQ_416	99.63	539	2	0	1	539	1	539	0	1104
MROB_1224	ESALQ_417	97.20	571	16	0	1	571	1	571	0	1144
MROB_1225	ESALQ_418	97.75	756	11	1	1	756	1	750	0	1523
MROB_1226	ESALQ_419	95.68	486	20	1	1	486	1	485	0	829
MROB_1227	ESALQ_420	99.59	488	2	0	1	488	1	488	0	999
MROB_1228	ESALQ_421	99.79	479	1	0	1	479	1	479	0	989
MROB_1229	ESALQ_422	98.82	510	6	0	1	510	1	510	0	1051
MROB_1230	ESALQ_423	98.55	1035	15	0	1	1035	1	1035	0	2104
MROB_1232	ESALQ_425	99.53	643	3	0	1	643	1	643	0	1335
MROB_1233	ESALQ_426	99.47	1507	8	0	1	1507	1	1507	0	3088
MROB_1234	ESALQ_427	95.34	622	29	0	1	622	1	622	0	1222
MROB_1235	ESALQ_428	100.00	330	0	0	1	330	1	330	0	670
MROB_1236	ESALQ_429	99.40	827	5	0	1	827	1	827	0	1693
MROB_1237	ESALQ_430	98.97	292	3	0	1	292	1	292	0	593
MROB_1238	ESALQ_431	99.63	272	1	0	1	272	1	272	0	558
MROB_1239	ESALQ_432	98.07	362	7	0	1	362	1	362	0	714
MROB_1240	ESALQ_433	99.11	449	4	0	1	449	1	449	0	912
MROB_1241	ESALQ_434	99.01	808	6	2	1	808	1	806	0	1587
MROB_1242	ESALQ_435	98.73	472	6	0	1	472	1	472	0	952
MROB_1243	ESALQ_436	100.00	253	0	0	1	253	1	253	0	520
MROB_1244	ESALQ_437	99.50	597	3	0	1	597	1	597	0	1237
MROB_1245	ESALQ_438	99.22	516	4	0	1	516	1	516	0	1074
MROB_1246	ESALQ_439	99.48	1151	6	0	1	1151	1	1151	0	2343
MROB_1247	ESALQ_440	99.73	743	2	0	1	743	1	743	0	1523
MROB_1248	ESALQ_441	99.40	672	4	0	1	672	1	672	0	1355
MROB_1249	ESALQ_442	96.96	724	4	1	1	706	1	724	0	1415
MROB_1251	ESALQ_444	98.28	873	12	1	1	870	1	873	0	1776
MROB_1253	ESALQ_446	99.09	992	9	0	1	992	1	992	0	2041
MROB_1254	ESALQ_447	99.42	520	3	0	1	520	1	520	0	1046
MROB_1256	ESALQ_449	99.91	1135	1	0	1	1135	1	1135	0	2251
MROB_1257	ESALQ_450	97.06	1089	30	1	22	1108	11	1099	0	2187
MROB_1259	ESALQ_452	97.66	853	19	1	1	853	1	852	0	1721
MROB_1260	ESALQ_453	99.06	533	5	0	1	533	1	533	0	1086
MROB_1261	ESALQ_455	100.00	289	0	0	71	359	1	289	0	598
MROB_1262	ESALQ_456	99.24	262	2	0	1	262	1	262	0	538
MROB_1263	ESALQ_457	99.79	482	1	0	1	482	1	482	0	995
MROB_1264	ESALQ_458	99.32	441	3	0	1	441	1	441	0	903
MROB_1265	ESALQ_459	98.66	897	10	1	2	896	176	1072	0	1816
MROB_1266	ESALQ_460	99.34	453	3	0	1	453	1	453	0	938
MROB_1268	ESALQ_462	99.60	496	2	0	11	506	1	496	0	995
MROB_1269	ESALQ_463	99.26	406	3	0	1	406	1	406	0	796
MROB_1270	ESALQ_464	100.00	424	0	0	1	424	1	424	0	867
MROB_1271	ESALQ_465	100.00	260	0	0	1	260	1	260	0	533
MROB_1272	ESALQ_466	99.62	264	1	0	1	264	1	264	0	544
MROB_1274	ESALQ_468	99.26	672	5	0	1	672	1	672	0	1376
MROB_1275	ESALQ_469	98.94	567	6	0	1	567	125	691	0	1179
MROB_1276	ESALQ_470	99.60	495	1	1	1	495	1	494	0	997
MROB_1277	ESALQ_471	99.56	676	3	0	1	676	1	676	0	1410
MROB_1280	ESALQ_474	99.41	1018	6	0	1	1018	1	1018	0	2109
MROB_1281	ESALQ_475	98.57	419	6	0	1	419	1	419	0	866
MROB_1282	ESALQ_476	97.93	338	5	1	1	338	1	336	0	646
MROB_1283	ESALQ_477	96.37	578	20	1	1	578	1	577	0	1115
MROB_1284	ESALQ_478	98.60	1213	17	0	1	1213	1	1213	0	2469
MROB_1286	ESALQ_480	98.04	767	15	0	62	828	8	774	0	1551
MROB_1288	ESALQ_482	98.25	401	7	0	1	401	1	401	0	769
MROB_1290	ESALQ_484	100.00	568	0	0	1	568	1	568	0	1160
MROB_1291	ESALQ_485	100.00	496	0	0	1	496	1	496	0	1026
MROB_1292	ESALQ_487	99.34	305	2	0	1	305	1	305	0	613
MROB_1293	ESALQ_488	99.09	330	3	0	1	330	1	330	0	666
MROB_1294	ESALQ_489	99.64	275	1	0	1	275	1	275	0	552
MROB_1296	ESALQ_491	98.19	774	14	0	1	774	1	774	0	1565
MROB_1298	ESALQ_493	99.08	981	9	0	1	981	1	981	0	2032
MROB_1300	ESALQ_495	97.31	297	8	0	1	297	1	297	0	582
MROB_1301	ESALQ_496	98.56	277	4	0	1	277	1	277	0	568
MROB_1302	ESALQ_497	99.27	685	5	0	1	685	1	685	0	1423
MROB_1303	ESALQ_498	99.56	452	2	0	1	452	1	452	0	905
MROB_1304	ESALQ_499	99.11	785	7	0	1	785	1	785	0	1195
MROB_1305	ESALQ_500	99.58	473	2	0	1	473	1	473	0	963
MROB_1306	ESALQ_501	98.63	655	9	0	1	655	1	655	0	1340
MROB_1307	ESALQ_502	97.40	385	10	0	1	385	1	385	0	770
MROB_1310	ESALQ_505	88.75	320	18	3	1	319	1	303	0	566
MROB_1311	ESALQ_506	99.21	378	3	0	1	378	1	378	0	775
MROB_1312	ESALQ_507	99.40	827	5	0	1	827	1	827	0	1689
MROB_1313	ESALQ_508	96.76	710	21	1	1	710	1	708	0	1429
MROB_1314	ESALQ_509	100.00	305	0	0	1	305	1	305	0	600
MROB_1315	ESALQ_510	98.15	972	11	1	1	972	1	965	0	1933
MROB_1318	ESALQ_513	99.18	364	3	0	1	364	1	364	0	741
MROB_1319	ESALQ_514	99.05	527	5	0	1	527	1	527	0	1079
MROB_1320	ESALQ_515	98.72	312	4	0	1	312	1	312	0	630
MROB_1321	ESALQ_516	99.60	250	1	0	1	250	1	250	0	514
MROB_1322	ESALQ_517	98.92	740	6	1	1	738	1	740	0	1436
MROB_1323	ESALQ_518	99.41	1010	5	1	1	1010	1	1009	0	2061
MROB_1324	ESALQ_519	99.28	693	5	0	1	693	1	693	0	1425
MROB_1325	ESALQ_520	98.74	554	7	0	161	714	1	554	0	1104
MROB_1326	ESALQ_521	97.00	400	12	0	162	561	292	691	0	786
MROB_1328	ESALQ_523	99.13	691	6	0	1	691	1	691	0	1388
MROB_1329	ESALQ_524	97.63	379	9	0	1	379	1	379	0	768
MROB_1330	ESALQ_525	97.97	295	6	0	1	295	1	295	0	589
MROB_1332	ESALQ_527	99.82	551	1	0	1	551	1	551	0	1120
MROB_1333	ESALQ_528	99.16	837	6	1	1	837	1	836	0	1696
MROB_1334	ESALQ_529	99.25	668	5	0	1	668	1	668	0	1355
MROB_1336	ESALQ_531	98.25	399	7	0	1	399	1	399	0	811
MROB_1337	ESALQ_532	96.93	522	4	1	74	583	1	522	0	1046
MROB_1339	ESALQ_533	92.34	640	12	2	1	640	1	603	0	1188
MROB_1340	ESALQ_534	99.24	263	2	0	1	263	1	263	0	535
MROB_1341	ESALQ_535	97.08	343	8	1	1	343	1	341	0	661
MROB_1342	ESALQ_536	99.29	565	4	0	1	565	1	565	0	1175
MROB_1343	ESALQ_537	97.36	605	16	0	1	605	1	605	0	1163
MROB_1344	ESALQ_538	97.03	606	12	1	1	600	1	606	0	1201
MROB_1346	ESALQ_540	99.37	637	4	0	1	637	1	637	0	1274
MROB_1347	ESALQ_541	99.32	293	2	0	1	293	1	293	0	611
MROB_1348	ESALQ_542	99.30	572	4	0	1	572	1	572	0	1145
MROB_1349	ESALQ_543	99.65	579	2	0	1	579	1	579	0	1170
MROB_1350	ESALQ_544	98.62	362	5	0	1	362	7	368	0	744
MROB_1351	ESALQ_545	100.00	306	0	0	1	306	1	306	0	640
MROB_1352	ESALQ_546	99.18	730	4	1	1	728	1	730	0	1459
MROB_1353	ESALQ_547	99.62	262	1	0	1	262	1	262	0	530
MROB_1354	ESALQ_548	100.00	255	0	0	1	255	1	255	0	524
MROB_1356	ESALQ_550	98.78	492	6	0	1	492	1	492	0	978
MROB_1357	ESALQ_551	98.32	477	8	0	1	477	1	477	0	964
MROB_1358	ESALQ_552	99.69	1277	4	0	1	1277	1	1277	0	2587
MROB_1359	ESALQ_553	99.53	845	4	0	1	845	1	845	0	1730
MROB_1360	ESALQ_554	100.00	363	0	0	1	363	1	363	0	745
MROB_1362	ESALQ_555	99.47	939	5	0	1	939	1	939	0	1941
MROB_1364	ESALQ_557	98.55	622	9	0	1	622	1	622	0	1269
MROB_1365	ESALQ_558	96.99	299	9	0	1	299	1	299	0	589
MROB_1366	ESALQ_559	100.00	593	0	0	1	593	1	593	0	1208
MROB_1367	ESALQ_560	95.33	664	7	1	1	640	1	664	0	1304
MROB_1368	ESALQ_561	99.75	396	1	0	1	396	1	396	0	800
MROB_1370	ESALQ_563	99.30	570	4	0	1	570	1	570	0	1102
MROB_1372	ESALQ_565	99.76	425	1	0	1	425	1	425	0	860
MROB_1373	ESALQ_566	99.78	464	1	0	1	464	1	464	0	946
MROB_1375	ESALQ_568	97.92	913	14	1	1	913	1	908	0	1790
MROB_1376	ESALQ_569	99.24	393	3	0	1	393	1	393	0	800
MROB_1377	ESALQ_570	98.63	1533	21	0	1	1533	1	1533	0	3148
MROB_1378	ESALQ_571	98.74	872	11	0	1	872	1	872	0	1772
MROB_1380	ESALQ_573	99.51	411	2	0	1	411	1	411	0	847
MROB_1381	ESALQ_574	98.95	953	9	1	1	953	1	952	0	1892
MROB_1382	ESALQ_575	99.39	493	3	0	1	493	1	493	0	1014
MROB_1383	ESALQ_576	98.81	1345	16	0	1	1345	1	1345	0	2728
MROB_1384	ESALQ_577	97.88	756	13	1	1	756	1	753	0	1540
MROB_1385	ESALQ_578	93.27	446	9	1	1	425	1	446	0	815
MROB_1387	ESALQ_580	98.42	442	7	0	1	442	1	442	0	887
MROB_1388	ESALQ_581	98.98	781	6	2	1	781	1	779	0	1543
MROB_1389	ESALQ_582	99.26	537	4	0	1	537	1	537	0	1107
MROB_1391	ESALQ_584	99.72	711	2	0	1	711	1	711	0	1458
MROB_1392	ESALQ_585	98.69	609	8	0	1	609	1	609	0	1234
MROB_1394	ESALQ_587	100.00	260	0	0	1	260	1	260	0	538
MROB_1395	ESALQ_588	97.88	2121	45	0	1	2121	1	2121	0	4197
MROB_1396	ESALQ_589	99.49	1175	6	0	1	1175	1	1175	0	2341
MROB_1397	ESALQ_590	100.00	750	0	0	1	750	1	750	0	1543
MROB_1398	ESALQ_591	89.04	757	22	3	1	696	1	757	0	1370
MROB_1400	ESALQ_593	99.38	1132	7	0	5	1136	83	1214	0	2270
MROB_1401	ESALQ_594	99.37	319	2	0	1	319	1	319	0	647
MROB_1402	ESALQ_595	98.83	341	4	0	1	341	1	341	0	704
MROB_1403	ESALQ_596	97.67	731	17	0	1	731	1	731	0	1478
MROB_1404	ESALQ_597	98.94	849	9	0	482	1330	15	863	0	1741
MROB_1405	ESALQ_599	99.30	427	3	0	1	427	1	427	0	859
MROB_1406	ESALQ_600	100.00	495	0	0	1	495	1	495	0	1030
MROB_1407	ESALQ_601	99.69	654	2	0	1	654	1	654	0	1356
MROB_1409	ESALQ_603	99.67	299	1	0	63	361	1	299	0	611
MROB_1411	ESALQ_605	97.80	273	6	0	1	273	1	273	0	549
MROB_1412	ESALQ_606	97.94	825	17	0	1	825	1	825	0	1683
MROB_1413	ESALQ_607	98.81	337	4	0	1	337	1	337	0	687
MROB_1414	ESALQ_608	90.84	404	35	1	1	402	1	404	0	647
MROB_1415	ESALQ_609	99.30	429	3	0	71	499	1	429	0	865
MROB_1416	ESALQ_610	97.60	416	10	0	1	416	1	416	0	850
MROB_1418	ESALQ_612	99.75	396	1	0	1	396	1	396	0	799
MROB_1420	ESALQ_614	98.90	905	10	0	1	905	1	905	0	1812
MROB_1421	ESALQ_615	99.83	593	1	0	1	593	1	593	0	1214
MROB_1422	ESALQ_616	100.00	323	0	0	1	323	1	323	0	663
MROB_1423	ESALQ_617	98.46	1692	23	1	1	1689	1	1692	0	3387
MROB_1424	ESALQ_618	96.88	417	7	2	1	417	1	411	0	811
MROB_1427	ESALQ_621	99.58	480	2	0	1	480	1	480	0	963
MROB_1428	ESALQ_622	99.69	322	1	0	1	322	1	322	0	645
MROB_1429	ESALQ_623	93.11	363	25	0	1	363	1	363	0	675
MROB_1430	ESALQ_624	99.48	1524	8	0	1	1524	1	1524	0	3003
MROB_1432	ESALQ_626	99.71	339	1	0	1	339	1	339	0	704
MROB_1433	ESALQ_627	87.14	350	6	1	1	350	1	311	0	598
MROB_1435	ESALQ_629	97.62	252	6	0	4	255	1	252	0	502
MROB_1436	ESALQ_630	99.24	264	2	0	1	264	1	264	0	540
MROB_1437	ESALQ_631	98.06	310	4	1	1	310	1	308	0	618
MROB_1438	ESALQ_632	99.09	984	9	0	1	984	1	984	0	1944
MROB_1439	ESALQ_633	97.86	701	14	1	1	701	1	700	0	1381
MROB_1440	ESALQ_634	92.11	545	17	4	18	537	1	544	0	953
MROB_1441	ESALQ_635	98.30	587	10	0	1	587	1	587	0	1187
MROB_1443	ESALQ_638	97.77	493	6	1	1	493	1	488	0	989
MROB_1444	ESALQ_639	97.66	1199	28	0	1	1199	1	1199	0	2383
MROB_1445	ESALQ_640	93.91	394	17	1	1	387	1	394	0	765
MROB_1446	ESALQ_641	97.18	319	9	0	1	319	1	319	0	639
MROB_1447	ESALQ_642	96.49	399	14	0	1	399	1	399	0	794
MROB_1448	ESALQ_643	97.18	319	9	0	1	319	1	319	0	650
MROB_1450	ESALQ_645	100.00	509	0	0	12	520	59	567	0	1039
MROB_1451	ESALQ_646	98.11	475	9	0	1	475	1	475	0	955
MROB_1452	ESALQ_647	99.67	303	1	0	19	321	2	304	0	619
MROB_1453	ESALQ_648	99.41	337	2	0	1	337	1	337	0	687
MROB_1454	ESALQ_649	98.90	724	8	0	1	724	1	724	0	1468
MROB_1456	ESALQ_651	95.17	642	25	2	1	640	1	638	0	1196
MROB_1458	ESALQ_652	99.78	453	1	0	1	453	1	453	0	942
MROB_1459	ESALQ_653	99.22	511	4	0	1	511	1	511	0	1053
MROB_1460	ESALQ_654	98.80	498	6	0	1	498	1	498	0	1014
MROB_1461	ESALQ_655	98.85	348	3	1	122	468	10	357	0	681
MROB_1462	ESALQ_656	99.84	619	1	0	1	619	1	619	0	1282
MROB_1464	ESALQ_658	99.43	350	2	0	1	350	1	350	0	714
MROB_1465	ESALQ_659	69.63	563	31	7	1	544	1	442	0	683
MROB_1467	ESALQ_661	99.26	405	3	0	1	405	1	405	0	835
MROB_1469	ESALQ_663	98.47	522	8	0	1	522	1	522	0	1067
MROB_1470	ESALQ_664	98.06	413	8	0	1	413	447	859	0	799
MROB_1471	ESALQ_664	96.41	418	15	0	1	418	1	418	0	771
MROB_1472	ESALQ_665	98.89	451	5	0	1	451	1	451	0	925
MROB_1473	ESALQ_666	94.72	284	14	1	1	283	1	284	0	541
MROB_1474	ESALQ_667	96.04	429	17	0	1	429	1	429	0	830
MROB_1475	ESALQ_668	96.74	399	12	1	1	398	1	399	0	790
MROB_1476	ESALQ_669	98.98	1269	13	0	118	1386	1	1269	0	2600
MROB_1477	ESALQ_670	99.07	535	5	0	1	535	1	535	0	1087
MROB_1478	ESALQ_671	98.04	255	5	0	1	255	1	255	0	512
MROB_1479	ESALQ_672	98.69	611	8	0	1	611	1	611	0	1249
MROB_1480	ESALQ_673	97.07	443	13	0	1	443	1	443	0	885
MROB_1481	ESALQ_674	100.00	486	0	0	1	486	1	486	0	1007
MROB_1483	ESALQ_676	99.80	497	1	0	1	497	1	497	0	1025
MROB_1484	ESALQ_677	98.86	1665	19	0	1	1665	1	1665	0	3388
MROB_1485	ESALQ_678	99.07	858	8	0	1	858	1	858	0	1653
MROB_1486	ESALQ_679	99.49	1944	8	1	1	1942	1	1944	0	3711
MROB_1487	ESALQ_680	100.00	450	0	0	1	450	1	450	0	941
MROB_1488	ESALQ_681	91.69	313	5	1	59	350	92	404	0	593
MROB_1489	ESALQ_682	97.74	707	16	0	1	707	1	707	0	1226
MROB_1490	ESALQ_683	99.14	934	8	0	1	934	1	934	0	1894
MROB_1491	ESALQ_684	99.64	281	1	0	1	281	1	281	0	582
MROB_1492	ESALQ_685	97.26	1569	43	0	1	1569	1	1569	0	3123
MROB_1493	ESALQ_686	99.31	722	5	0	1	722	1	722	0	1489
MROB_1495	ESALQ_688	98.91	459	5	0	1	459	1	459	0	929
MROB_1496	ESALQ_689	97.37	609	16	0	1	609	1	609	0	1225
MROB_1497	ESALQ_690	97.01	1036	28	1	1	1033	1	1036	0	1742
MROB_1498	ESALQ_691	98.19	441	6	1	1	441	1	439	0	842
MROB_1500	ESALQ_692	98.03	558	11	0	1	558	1	558	0	1137
MROB_1504	ESALQ_695	96.06	457	17	1	1	457	1	456	0	896
MROB_1505	ESALQ_696	97.86	421	9	0	1	421	1	421	0	715
MROB_1506	ESALQ_697	97.95	635	13	0	1	635	29	663	0	1290
MROB_1507	ESALQ_698	98.81	755	9	0	1	755	1	755	0	1535
MROB_1508	ESALQ_699	96.57	379	13	0	1	379	1	379	0	752
MROB_1509	ESALQ_700	98.02	555	11	0	1	555	1	555	0	1101
MROB_1510	ESALQ_701	99.80	1955	4	0	1	1955	1	1955	0	4051
MROB_1512	ESALQ_702	99.61	258	1	0	1	258	80	337	0	530
MROB_1513	ESALQ_703	95.45	571	3	1	176	746	1	548	0	1099
MROB_1514	ESALQ_704	93.98	498	28	2	1	498	1	496	0	961
MROB_1515	ESALQ_705	98.82	592	7	0	1	592	1	592	0	1228
MROB_1516	ESALQ_706	97.22	540	15	0	1	540	1	540	0	1084
MROB_1519	ESALQ_709	97.21	359	10	0	2	360	49	407	0	716
MROB_1520	ESALQ_710	98.36	365	6	0	1	365	1	365	0	748
MROB_1521	ESALQ_711	98.71	1322	17	0	1	1322	1	1322	0	2702
MROB_1522	ESALQ_712	99.82	555	1	0	1	555	1	555	0	1159
MROB_1524	ESALQ_714	98.31	295	5	0	1	295	1	295	0	606
MROB_1525	ESALQ_715	91.39	418	36	0	1	418	2	419	0	752
MROB_1526	ESALQ_716	97.80	410	9	0	1	410	1	410	0	831
MROB_1527	ESALQ_717	97.61	293	7	0	3	295	114	406	0	595
MROB_1529	ESALQ_719	99.44	1070	6	0	1	1070	1	1070	0	2196
MROB_1530	ESALQ_720	99.19	991	8	0	1	991	1	991	0	2018
MROB_1531	ESALQ_721	93.68	269	3	1	1	269	1	255	0	510
MROB_1533	ESALQ_723	94.61	334	14	1	1	330	1	334	0	583
MROB_1534	ESALQ_724	97.82	641	14	0	1	641	1	641	0	1306
MROB_1535	ESALQ_725	96.09	588	3	2	1	586	1	570	0	1138
MROB_1537	ESALQ_727	90.34	445	43	0	1	445	1	445	0	565
MROB_1539	ESALQ_729	93.14	1006	17	2	1	1006	1	954	0	1931
MROB_1540	ESALQ_730	99.55	890	4	0	1	890	1	890	0	1835
MROB_1541	ESALQ_731	97.94	339	7	0	1	339	1	339	0	696
MROB_1542	ESALQ_732	99.34	454	3	0	1	454	1	454	0	937
MROB_1543	ESALQ_733	98.90	1086	6	1	1	1080	1	1086	0	2196
MROB_1544	ESALQ_734	95.15	721	13	1	1	699	1	721	0	1432
MROB_1545	ESALQ_735	96.45	564	19	1	1	564	1	563	0	1121
MROB_1546	ESALQ_736	98.21	335	6	0	14	348	15	349	0	679
MROB_1547	ESALQ_737	94.85	990	43	2	1	982	1	990	0	1872
MROB_1548	ESALQ_738	98.97	388	4	0	1	388	1	388	0	793
MROB_1549	ESALQ_739	98.78	821	10	0	1	821	1	821	0	1674
MROB_1550	ESALQ_740	99.10	556	5	0	1	556	1	556	0	1150
MROB_1552	ESALQ_742	96.15	312	11	1	1	311	1	312	0	615
MROB_1553	ESALQ_743	96.76	340	11	0	1	340	1	340	0	663
MROB_1554	ESALQ_744	99.35	461	3	0	1	461	1	461	0	959
MROB_1555	ESALQ_745	99.63	273	1	0	1	273	1	273	0	561
MROB_1557	ESALQ_748	98.83	513	3	1	1	510	1	513	0	1046
MROB_1558	ESALQ_749	99.85	649	1	0	1	649	1	649	0	1349
MROB_1559	ESALQ_750	97.47	554	14	0	1	554	1	554	0	1132
MROB_1560	ESALQ_751	98.87	794	9	0	1	794	1	794	0	1560
MROB_1561	ESALQ_752	99.46	2030	11	0	1	2030	1	2030	0	4064
MROB_1563	ESALQ_754	95.06	324	16	0	1	324	34	357	0	623
MROB_1565	ESALQ_756	95.44	351	16	0	1	351	1	351	0	699
MROB_1567	ESALQ_758	98.09	314	5	1	1	313	1	314	0	537
MROB_1568	ESALQ_759	99.65	862	3	0	1	862	1	862	0	1784
MROB_1569	ESALQ_760	98.08	260	5	0	1	260	1	260	0	534
MROB_1570	ESALQ_761	100.00	249	0	0	1	249	1	249	0	507
MROB_1572	ESALQ_763	99.40	1162	7	0	1	1162	1	1162	0	2393
MROB_1573	ESALQ_764	94.53	439	24	0	1	439	1	439	0	865
MROB_1574	ESALQ_765	99.62	1046	3	1	1	1045	1	1046	0	2146
MROB_1575	ESALQ_766	98.92	279	3	0	1	279	1	279	0	578
MROB_1576	ESALQ_767	99.80	492	1	0	1	492	1	492	0	998
MROB_1577	ESALQ_768	97.99	448	9	0	1	448	1	448	0	904
MROB_1578	ESALQ_769	99.58	947	4	0	1	947	1	947	0	1957
MROB_1581	ESALQ_772	99.37	315	2	0	1	315	1	315	0	627
MROB_1582	ESALQ_773	93.07	404	26	1	1	404	1	402	0	640
MROB_1583	ESALQ_774	99.20	249	2	0	1	249	1	249	0	505
MROB_1584	ESALQ_775	97.56	860	21	0	55	914	15	874	0	1697
MROB_1585	ESALQ_776	100.00	251	0	0	1	251	1	251	0	522
MROB_1586	ESALQ_777	98.27	579	9	1	1	578	1	579	0	1065
MROB_1587	ESALQ_778	97.57	535	12	1	1	535	1	534	0	1057
MROB_1588	ESALQ_779	99.12	685	5	1	1	684	1	685	0	1396
MROB_1589	ESALQ_780	98.00	599	12	0	1	599	1	599	0	1217
MROB_1590	ESALQ_781	96.21	4832	133	1	1	4782	1	4832	0	9619
MROB_1591	ESALQ_782	98.61	575	8	0	1	575	6	580	0	1171
MROB_1592	ESALQ_783	99.45	544	3	0	1	544	1	544	0	1126
MROB_1594	ESALQ_785	99.41	509	3	0	1	509	1	509	0	1043
MROB_1595	ESALQ_787	99.31	577	4	0	1	577	1	577	0	1189
MROB_1596	ESALQ_788	99.72	356	1	0	1	356	1	356	0	730
MROB_1597	ESALQ_790	98.35	1511	7	1	1	1511	1	1493	0	3083
MROB_1598	ESALQ_791	99.51	814	4	0	1	814	1	814	0	1689
MROB_1599	ESALQ_792	97.32	448	8	1	1	448	1	444	0	832
MROB_1600	ESALQ_793	96.52	402	14	0	1	402	1	402	0	764
MROB_1601	ESALQ_794	100.00	1157	0	0	1	1157	1	1157	0	2411
MROB_1602	ESALQ_795	99.51	1023	5	0	1	1023	1	1023	0	2111
MROB_1604	ESALQ_797	97.13	872	25	0	1	872	1	872	0	1731
MROB_1605	ESALQ_798	99.34	302	1	1	1	301	1	302	0	605
MROB_1606	ESALQ_799	99.66	297	1	0	1	297	1	297	0	609
MROB_1607	ESALQ_800	99.59	245	1	0	1	245	1	245	0	504
MROB_1608	ESALQ_801	99.65	571	2	0	345	915	415	985	0	1176
MROB_1610	ESALQ_803	99.80	501	1	0	1	501	1	501	0	1030
MROB_1612	ESALQ_805	97.34	1989	36	1	1	1989	1	1972	0	3893
MROB_1613	ESALQ_806	99.67	305	1	0	1	305	1	305	0	616
MROB_1614	ESALQ_807	98.86	615	5	1	68	680	4	618	0	1222
MROB_1615	ESALQ_808	99.13	458	4	0	1	458	1	458	0	914
MROB_1616	ESALQ_809	98.38	863	12	2	1	862	1	862	0	1717
MROB_1618	ESALQ_811	87.21	524	62	3	1	521	1	522	0	779
MROB_1620	ESALQ_813	100.00	449	0	0	1	449	1	449	0	944
MROB_1621	ESALQ_814	99.46	370	2	0	1	370	1	370	0	763
MROB_1622	ESALQ_815	100.00	511	0	0	1	511	1	511	0	1045
MROB_1623	ESALQ_816	99.77	857	2	0	1	857	1	857	0	1751
MROB_1624	ESALQ_817	97.05	305	9	0	1	305	1	305	0	599
MROB_1627	ESALQ_820	99.67	3994	13	0	1	3994	1	3994	0	8081
MROB_1628	ESALQ_821	97.95	830	17	0	37	866	117	946	0	1682
MROB_1631	ESALQ_824	95.31	320	2	1	1	320	1	307	0	620
MROB_1633	ESALQ_825	97.38	955	20	1	1	955	1	950	0	1890
MROB_1634	ESALQ_826	99.21	509	4	0	1	509	1	509	0	1053
MROB_1637	ESALQ_829	99.87	799	1	0	1	799	1	799	0	1665
MROB_1639	ESALQ_831	92.64	639	23	3	1	639	65	679	0	1178
MROB_1640	ESALQ_832	98.69	991	13	0	1	991	1	991	0	2021
MROB_1643	ESALQ_835	99.25	265	2	0	1	265	1	265	0	533
MROB_1644	ESALQ_836	99.73	750	2	0	1	750	1	750	0	1561
MROB_1645	ESALQ_837	86.93	528	20	3	86	568	1	524	0	860
MROB_1646	ESALQ_838	99.08	870	8	0	1	870	1	870	0	1760
MROB_1647	ESALQ_840	97.81	319	3	1	1	315	1	319	0	592
MROB_1648	ESALQ_842	98.85	434	5	0	1	434	1	434	0	875
MROB_1650	ESALQ_844	99.72	705	2	0	1	705	1	705	0	1455
MROB_1651	ESALQ_845	98.62	1012	14	0	1	1012	1	1012	0	2073
MROB_1652	ESALQ_846	99.68	317	1	0	1	317	1	317	0	646
MROB_1653	ESALQ_847	99.36	472	3	0	1	472	1	472	0	968
MROB_1654	ESALQ_848	99.71	679	2	0	1	679	1	679	0	1372
MROB_1655	ESALQ_849	97.79	949	0	1	1	928	1	949	0	1874
MROB_1656	ESALQ_850	97.26	475	13	0	2	476	18	492	0	958
MROB_1657	ESALQ_851	95.34	537	7	2	1	519	1	537	0	1039
MROB_1658	ESALQ_852	99.46	1118	5	1	1	1117	1	1118	0	2271
MROB_1659	ESALQ_853	98.60	570	8	0	1	570	1	570	0	1180
MROB_1660	ESALQ_854	90.65	834	45	4	1	813	1	822	0	1490
MROB_1661	ESALQ_855	97.98	743	8	1	1	736	1	743	0	1498
MROB_1662	ESALQ_856	99.81	2111	4	0	1	2111	1	2111	0	4373
MROB_1663	ESALQ_857	99.41	341	2	0	1	341	1	341	0	673
MROB_1667	ESALQ_861	94.91	806	41	0	7	812	1	806	0	1500
MROB_1668	ESALQ_862	99.22	384	3	0	1	384	1	384	0	775
MROB_1669	ESALQ_863	99.41	1011	6	0	1	1011	1	1011	0	2053
MROB_1671	ESALQ_865	99.03	518	4	1	1	518	1	517	0	1045
MROB_1672	ESALQ_866	92.65	422	15	3	1	416	1	412	0	678
MROB_1674	ESALQ_868	97.74	1414	28	2	1	1411	1	1413	0	2850
MROB_1675	ESALQ_869	99.35	620	4	0	1	620	1	620	0	1256
MROB_1676	ESALQ_870	99.28	414	3	0	36	449	111	524	0	847
MROB_1677	ESALQ_871	99.31	433	3	0	1	433	1	433	0	897
MROB_1678	ESALQ_872	100.00	691	0	0	1	691	1	691	0	1441
MROB_1679	ESALQ_873	99.55	446	2	0	1	446	1	446	0	921
MROB_1680	ESALQ_874	99.72	362	1	0	1	362	1	362	0	755
MROB_1681	ESALQ_875	98.99	296	3	0	1	296	1	296	0	600
MROB_1682	ESALQ_876	99.53	429	2	0	1	429	1	429	0	891
MROB_1683	ESALQ_877	99.60	252	1	0	1	252	1	252	0	509
MROB_1684	ESALQ_878	98.04	306	6	0	1	306	1	306	0	596
MROB_1685	ESALQ_879	99.68	308	1	0	1	308	1	308	0	629
MROB_1686	ESALQ_880	89.93	278	24	1	1	278	1	274	0	506
MROB_1687	ESALQ_881	98.25	741	12	1	1	741	35	774	0	1512
MROB_1688	ESALQ_882	94.57	1290	15	3	1	1235	1	1290	0	2429
MROB_1690	ESALQ_884	99.48	573	3	0	1	573	1	573	0	1170
MROB_1692	ESALQ_885	97.18	248	7	0	1	248	1	248	0	507
MROB_1693	ESALQ_886	89.76	332	33	1	19	350	19	349	0	562
MROB_1694	ESALQ_887	93.66	694	24	2	1	694	1	674	0	1282
MROB_1697	ESALQ_890	98.50	333	5	0	1	333	1	333	0	676
MROB_1698	ESALQ_892	97.61	419	9	1	1	418	1	419	0	841
MROB_1699	ESALQ_893	96.58	702	22	1	1	700	1	702	0	1347
MROB_1700	ESALQ_894	98.26	749	13	0	1	749	1	749	0	1535
MROB_1702	ESALQ_896	98.15	379	7	0	57	435	1	379	0	763
MROB_1703	ESALQ_897	99.72	356	1	0	1	356	1	356	0	738
MROB_1704	ESALQ_898	99.68	308	1	0	1	308	1	308	0	627
MROB_1705	ESALQ_899	97.00	634	19	0	1	634	1	634	0	1280
MROB_1706	ESALQ_900	96.76	340	6	1	1	340	1	335	0	662
MROB_1707	ESALQ_901	98.99	494	5	0	1	494	1	494	0	971
MROB_1708	ESALQ_902	99.71	688	2	0	122	809	1	688	0	1409
MROB_1709	ESALQ_903	93.50	400	18	1	16	407	115	514	0	739
MROB_1710	ESALQ_904	99.91	1119	1	0	1	1119	1	1119	0	2313
MROB_1711	ESALQ_905	98.74	714	9	0	1	714	1	714	0	1457
MROB_1714	ESALQ_908	99.37	476	3	0	1	476	1	476	0	979
MROB_1715	ESALQ_909	99.70	672	2	0	1	672	1	672	0	1327
MROB_1717	ESALQ_911	98.77	406	5	0	1	406	1	406	0	824
MROB_1718	ESALQ_912	99.77	426	1	0	1	426	1	426	0	831
MROB_1720	ESALQ_914	99.72	726	2	0	1	726	1	726	0	1487
MROB_1721	ESALQ_915	95.98	547	22	0	1	547	1	547	0	984
MROB_1722	ESALQ_916	98.33	299	5	0	1	299	1	299	0	618
MROB_1723	ESALQ_917	92.97	313	10	1	1	301	1	313	0	594
MROB_1724	ESALQ_918	97.83	507	0	1	1	507	1	496	0	1019
MROB_1725	ESALQ_919	100.00	317	0	0	1	317	1	317	0	655
MROB_1726	ESALQ_920	99.28	828	6	0	1	828	1	828	0	1671
MROB_1727	ESALQ_921	99.09	986	9	0	30	1015	1	986	0	2017
MROB_1728	ESALQ_921	99.68	947	3	0	1	947	1021	1967	0	1833
MROB_1730	ESALQ_923	99.80	492	1	0	1	492	1	492	0	1021
MROB_1731	ESALQ_924	96.84	855	26	1	1	854	1	855	0	1670
MROB_1732	ESALQ_925	99.28	277	2	0	1	277	1	277	0	569
MROB_1736	ESALQ_928	99.15	943	8	0	1	943	1	943	0	1929
MROB_1737	ESALQ_929	98.66	449	6	0	1	449	1	449	0	899
MROB_1738	ESALQ_930	98.24	681	11	1	1	681	1	680	0	1384
MROB_1739	ESALQ_931	97.57	742	18	0	1	742	1	742	0	1471
MROB_1740	ESALQ_932	97.25	327	9	0	1	327	1	327	0	658
MROB_1742	ESALQ_933	97.36	417	11	0	1	417	1	417	0	741
MROB_1743	ESALQ_936	98.54	687	10	0	1	687	1	687	0	1348
MROB_1745	ESALQ_938	98.19	609	11	0	16	624	54	662	0	1186
MROB_1747	ESALQ_940	99.36	1252	8	0	1	1252	1	1252	0	2566
MROB_1748	ESALQ_941	95.96	718	7	2	1	696	1	718	0	1404
MROB_1749	ESALQ_943	98.96	578	6	0	1	578	1	578	0	1112
MROB_1750	ESALQ_945	98.95	574	6	0	1	574	1	574	0	1171
MROB_1751	ESALQ_947	97.59	1409	30	2	1	1406	1	1408	0	2805
MROB_1752	ESALQ_948	98.68	303	4	0	1	303	1	303	0	613
MROB_1753	ESALQ_949	99.76	424	1	0	1	424	1	424	0	879
MROB_1754	ESALQ_950	99.33	601	4	0	1	601	1	601	0	1238
MROB_1755	ESALQ_951	98.77	1383	13	1	1	1379	1	1383	0	2846
MROB_1756	ESALQ_952	92.49	519	25	3	1	509	1	515	0	985
MROB_1757	ESALQ_953	100.00	799	0	0	1	799	1	799	0	1650
MROB_1759	ESALQ_955	99.73	1098	1	2	1	1097	1	1097	0	2236
MROB_1760	ESALQ_956	99.10	555	5	0	1	555	1	555	0	1135
MROB_1761	ESALQ_957	99.68	621	2	0	1	621	1	621	0	1292
MROB_1762	ESALQ_958	97.35	528	14	0	1	528	1	528	0	1084
MROB_1763	ESALQ_959	99.14	465	4	0	1	465	1	465	0	950
MROB_1764	ESALQ_960	92.71	329	21	1	1	329	1	326	0	561
MROB_1765	ESALQ_961	99.80	510	1	0	1	510	1	510	0	1046
MROB_1766	ESALQ_962	97.79	408	9	0	1	408	1	408	0	818
MROB_1767	ESALQ_963	99.46	555	3	0	1	555	1	555	0	1139
MROB_1768	ESALQ_987	97.27	403	11	0	1	403	224	626	0	798
MROB_1770	ESALQ_988	95.74	516	10	1	1	516	1	504	0	1004
MROB_1771	ESALQ_989	98.13	643	12	0	5	647	43	685	0	1295
MROB_1772	ESALQ_990	98.41	252	4	0	1	252	1	252	0	501
MROB_1773	ESALQ_991	93.64	535	34	0	1	535	1	535	0	995
MROB_1774	ESALQ_992	97.79	724	16	0	1	724	1	724	0	1471
MROB_1775	ESALQ_993	100.00	385	0	0	1	385	1	385	0	701
MROB_1776	ESALQ_994	99.72	355	1	0	1	355	1	355	0	729
MROB_1777	ESALQ_995	100.00	324	0	0	1	324	1	324	0	651
MROB_1778	ESALQ_996	98.93	281	3	0	1	281	1	281	0	584
MROB_1779	ESALQ_997	96.30	487	18	0	1	487	1	487	0	966
MROB_1780	ESALQ_998	96.97	1352	39	1	1	1350	1	1352	0	2539
MROB_1783	ESALQ_1000	98.80	1589	19	0	1	1589	1	1589	0	3241
MROB_1785	ESALQ_1002	99.15	591	5	0	1	591	1	591	0	1192
MROB_1786	ESALQ_1003	82.68	560	43	8	1	552	1	514	0	889
MROB_1787	ESALQ_1004	97.36	265	7	0	1	265	1	265	0	539
MROB_1788	ESALQ_1005	97.62	378	9	0	1	378	1	378	0	722
MROB_1789	ESALQ_1006	96.48	426	15	0	1	426	1	426	0	846
MROB_1790	ESALQ_1007	93.22	339	23	0	1	339	1	339	0	629
MROB_1791	ESALQ_1008	96.65	358	12	0	1	358	1	358	0	717
MROB_1793	ESALQ_1010	97.23	361	5	2	1	361	1	356	0	697
MROB_1794	ESALQ_1011	98.80	334	4	0	1	334	1	334	0	679
MROB_1795	ESALQ_1012	96.21	290	11	0	1	290	1	290	0	563
MROB_1796	ESALQ_1013	92.77	512	10	1	1	512	1	485	0	963
MROB_1797	ESALQ_1014	95.04	383	6	3	1	383	1	370	0	726
MROB_1798	ESALQ_1015	99.83	605	1	0	1	605	1	605	0	1187
MROB_1799	ESALQ_1016	97.02	537	16	0	1	537	1	537	0	1085
MROB_1802	ESALQ_1019	97.24	544	15	0	1	544	1	544	0	1105
MROB_1803	ESALQ_1020	90.03	291	1	1	45	307	83	373	0	522
MROB_1804	ESALQ_1021	99.02	920	9	0	1	920	1	920	0	1830
MROB_1805	ESALQ_1022	94.44	360	20	0	1	360	1	360	0	574
MROB_1806	ESALQ_1023	91.92	297	24	0	1	297	1	297	0	562
MROB_1807	ESALQ_1024	91.70	265	22	0	1	265	1	265	0	505
MROB_1808	ESALQ_1025	96.40	333	12	0	1	333	1	333	0	669
MROB_1809	ESALQ_1026	92.23	386	10	1	1	386	1	366	0	732
MROB_1811	ESALQ_1028	83.37	463	46	1	1	463	1	432	0	794
MROB_1812	ESALQ_1029	98.58	281	4	0	1	281	1	281	0	574
MROB_1813	ESALQ_1030	98.51	808	12	0	1	808	1	808	0	1657
MROB_1814	ESALQ_1031	98.37	368	5	1	1	367	1	368	0	756
MROB_1815	ESALQ_1032	86.07	1421	153	6	1	1395	1	1402	0	2473
MROB_1817	ESALQ_1034	95.39	803	31	3	1	800	1	800	0	1562
MROB_1818	ESALQ_1035	98.01	301	6	0	129	429	1	301	0	599
MROB_1821	ESALQ_1039	91.15	305	26	1	1	305	1	304	0	570
MROB_1822	ESALQ_1040	96.09	358	14	0	1	358	1	358	0	723
MROB_1824	ESALQ_1043	93.02	1160	76	1	1	1160	1	1155	0	2175
MROB_1825	ESALQ_1044	92.59	580	43	0	1	580	1	580	0	1084
MROB_1828	ESALQ_1047	93.54	325	2	1	1	325	1	306	0	625
MROB_1829	ESALQ_1048	95.66	415	2	1	1	415	1	399	0	818
MROB_1830	ESALQ_1049	88.54	288	7	1	1	262	1	288	0	509
MROB_1834	ESALQ_1057	99.61	258	1	0	1	258	1	258	0	539
MROB_1843	ESALQ_3465	99.70	331	1	0	1	331	1	331	0	683
MROB_1844	ESALQ_3466	96.58	2488	85	0	1	2488	1	2488	0	4903
MROB_1845	ESALQ_3467	97.70	305	7	0	1	305	84	388	0	627
MROB_1846	ESALQ_3468	96.19	341	13	0	1	341	1	341	0	674
MROB_1847	ESALQ_3469	98.02	506	10	0	1	506	1	506	0	1001
MROB_1848	ESALQ_3470	99.35	307	2	0	1	307	1	307	0	630
MROB_1849	ESALQ_3471	95.21	501	21	2	1	498	1	501	0	926
MROB_1850	ESALQ_3472	98.52	1619	22	1	1	1617	1	1619	0	3191
MROB_1852	ESALQ_3474	95.36	927	30	4	1	914	1	927	0	1762
MROB_1853	ESALQ_3475	95.43	481	2	1	1	461	1	481	0	934
MROB_1859	ESALQ_3478	98.90	543	6	0	1	543	1	543	0	1113
MROB_1861	ESALQ_3481	97.70	261	6	0	1	261	19	279	0	526
MROB_1862	ESALQ_3482	98.41	878	12	1	1	876	241	1118	0	1781
MROB_1863	ESALQ_3483	95.86	459	16	2	2	458	15	472	0	894
MROB_1864	ESALQ_3484	90.41	469	29	1	1	453	1	469	0	858
MROB_1865	ESALQ_3485	89.27	606	11	2	88	693	1	552	0	1087
MROB_1866	ESALQ_3486	99.50	999	5	0	1	999	1	999	0	2071
MROB_1868	ESALQ_3488	96.15	390	15	0	1	390	1	390	0	790
MROB_1869	ESALQ_3489	97.71	875	18	1	1	875	1	873	0	1742
MROB_1871	ESALQ_3491	99.60	1243	5	0	1	1243	1	1243	0	2545
MROB_1872	ESALQ_3492	98.10	473	5	1	1	469	1	473	0	933
MROB_1873	ESALQ_3493	87.76	294	25	2	1	283	1	294	0	508
MROB_1874	ESALQ_3494	99.33	1050	7	0	1	1050	1	1050	0	2147
MROB_1875	ESALQ_3495	99.56	1799	8	0	1	1799	1	1799	0	3643
MROB_1876	ESALQ_3496	98.08	1042	20	0	1	1042	1	1042	0	2093
MROB_1877	ESALQ_3497	98.97	290	3	0	8	297	10	299	0	583
MROB_1878	ESALQ_3498	99.42	1372	8	0	1	1372	1	1372	0	2758
MROB_1879	ESALQ_3499	59.88	521	177	6	1	518	1	492	0	525
MROB_1880	ESALQ_3500	89.73	584	16	3	1	583	1	541	0	1052
MROB_1882	ESALQ_3502	99.81	522	1	0	1	522	1	522	0	1094
MROB_1884	ESALQ_3504	99.45	1098	6	0	1	1098	1	1098	0	2212
MROB_1886	ESALQ_3507	97.88	614	12	1	349	961	1	614	0	1246
MROB_1887	ESALQ_3508	98.63	366	5	0	1	366	1	366	0	747
MROB_1889	ESALQ_3510	96.68	482	16	0	1	482	1	482	0	944
MROB_1890	ESALQ_3511	93.40	515	33	1	1	515	6	519	0	995
MROB_1892	ESALQ_3514	95.42	371	17	0	1	371	1	371	0	740
MROB_1898	ESALQ_3521	95.26	1182	27	3	455	1607	16	1197	0	2275
MROB_1899	ESALQ_3522	97.16	809	23	0	1	809	1	809	0	1620
MROB_1900	ESALQ_3523	98.98	393	4	0	1	393	1	393	0	766
MROB_1901	ESALQ_3524	96.41	1115	21	3	1	1096	1	1115	0	2191
MROB_1902	ESALQ_3525	94.81	462	24	0	1	462	1	462	0	891
MROB_1903	ESALQ_3526	99.11	1119	10	0	1	1119	1	1119	0	2285
MROB_1904	ESALQ_3527	100.00	389	0	0	1	389	1	389	0	790
MROB_1905	ESALQ_3528	99.01	303	3	0	1	303	1	303	0	627
MROB_1906	ESALQ_3529	98.94	939	10	0	1	939	1	939	0	1922
MROB_1907	ESALQ_3530	98.90	998	11	0	1	998	1	998	0	2030
MROB_1909	ESALQ_3532	99.77	884	2	0	1	884	1	884	0	1828
MROB_1910	ESALQ_3533	58.38	591	197	6	1	588	1	545	0	634
MROB_1911	ESALQ_9232	61.79	424	159	3	29	449	1	424	0	526
MROB_1913	ESALQ_3536	93.97	365	22	0	1	365	16	380	0	697
MROB_1914	ESALQ_3538	89.82	442	45	0	1	442	1	442	0	832
MROB_1916	ESALQ_3540	97.48	317	8	0	234	550	1	317	0	637
MROB_1918	ESALQ_3542	97.75	311	6	1	19	329	35	344	0	557
MROB_1919	ESALQ_3543	85.83	628	56	4	20	647	5	599	0	1043
MROB_1921	ESALQ_3545	96.76	432	14	0	1	432	1	432	0	847
MROB_1922	ESALQ_3546	97.98	2077	39	3	1	2075	1	2076	0	4057
MROB_1924	ESALQ_3547	98.93	560	6	0	1	560	1	560	0	1119
MROB_1925	ESALQ_3548	98.58	281	4	0	1	281	1	281	0	577
MROB_1926	ESALQ_3549	97.67	472	11	0	1	472	1	472	0	953
MROB_1927	ESALQ_3550	91.80	646	10	1	1	603	1	646	0	1216
MROB_1930	ESALQ_3552	99.52	414	2	0	29	442	24	437	0	847
MROB_1931	ESALQ_3553	99.19	247	2	0	1	247	1	247	0	504
MROB_1932	ESALQ_3554	97.54	284	7	0	1	284	1	284	0	566
MROB_1934	ESALQ_3556	98.02	909	18	0	1	909	1	909	0	1860
MROB_1935	ESALQ_3557	97.93	725	15	0	1	725	1	725	0	1465
MROB_1936	ESALQ_3558	98.88	358	4	0	55	412	1	358	0	738
MROB_1937	ESALQ_3559	98.07	827	14	2	1	827	1	825	0	1631
MROB_1938	ESALQ_3560	99.16	479	4	0	1	479	1	479	0	992
MROB_1939	ESALQ_3561	98.90	273	3	0	1	273	1	273	0	555
MROB_1940	ESALQ_3562	98.62	3975	55	0	1	3975	1	3975	0	8086
MROB_1941	ESALQ_3563	99.34	452	3	0	1	452	1	452	0	926
MROB_1943	ESALQ_3565	96.83	410	13	0	1	410	1	410	0	820
MROB_1944	ESALQ_3566	98.38	308	5	0	1	308	1	308	0	630
MROB_1945	ESALQ_3567	98.13	267	5	0	1	267	1	267	0	542
MROB_1947	ESALQ_3569	98.69	535	7	0	1	535	1	535	0	1099
MROB_1948	ESALQ_3570	89.67	697	21	3	1	681	1	662	0	1216
MROB_1949	ESALQ_3571	95.84	697	12	1	1	697	1	680	0	1377
MROB_1951	ESALQ_3573	94.65	636	34	0	10	645	1	636	0	1233
MROB_1952	ESALQ_3574	78.34	397	79	2	1	397	1	390	0	623
MROB_1953	ESALQ_3575	81.33	450	79	2	1	447	1	448	0	703
MROB_1956	ESALQ_3581	99.52	419	2	0	1	419	29	447	0	849
MROB_1957	ESALQ_3582	99.37	315	2	0	1	315	1	315	0	646
MROB_1958	ESALQ_3583	98.96	481	5	0	1	481	1	481	0	978
MROB_1959	ESALQ_3584	98.21	726	13	0	74	799	1	726	0	1477
MROB_1960	ESALQ_3585	97.79	362	6	2	1	360	1	362	0	683
MROB_1961	ESALQ_3586	95.60	386	17	0	1	386	1	386	0	749
MROB_1962	ESALQ_3587	97.04	608	17	1	138	744	39	646	0	1180
MROB_1963	ESALQ_3588	97.56	287	7	0	1	287	1	287	0	580
MROB_1964	ESALQ_3589	96.36	439	16	0	78	516	35	473	0	862
MROB_1965	ESALQ_3590	98.16	651	12	0	1	651	1	651	0	1336
MROB_1966	ESALQ_3592	98.77	406	5	0	1	406	1	406	0	817
MROB_1967	ESALQ_3593	93.89	360	22	0	1	360	1	360	0	634
MROB_1968	ESALQ_3594	98.91	274	3	0	1	274	1	274	0	559
MROB_1971	ESALQ_3597	100.00	366	0	0	1	366	1	366	0	739
MROB_1973	ESALQ_3600	99.43	874	5	0	913	1786	398	1271	0	1801
MROB_1974	ESALQ_3601	99.22	512	4	0	1	512	1	512	0	1040
MROB_1975	ESALQ_3602	96.04	631	25	0	120	750	1	631	0	1182
MROB_1976	ESALQ_3604	97.68	345	8	0	1	345	1	345	0	686
MROB_1977	ESALQ_3605	90.41	740	50	2	1	719	1	740	0	1401
MROB_1978	ESALQ_3606	83.92	566	66	3	52	617	3	543	0	961
MROB_1980	ESALQ_3608	97.12	382	11	0	1	382	62	443	0	770
MROB_1981	ESALQ_3609	98.51	603	9	0	1	603	1	603	0	1221
MROB_1982	ESALQ_3610	97.51	441	2	2	1	434	8	446	0	878
MROB_1983	ESALQ_3611	98.61	431	6	0	1	431	1	431	0	867
MROB_1986	ESALQ_3614	98.88	356	4	0	1	356	1	356	0	724
MROB_1991	ESALQ_3618	91.67	684	13	1	1	640	1	684	0	1254
MROB_1992	ESALQ_3619	68.96	670	121	8	1	666	54	640	0	874
MROB_1993	ESALQ_3620	99.17	360	3	0	5	364	8	367	0	744
MROB_1994	ESALQ_3621	99.78	446	1	0	1	446	1	446	0	909
MROB_1995	ESALQ_3622	99.37	315	2	0	1	315	1	315	0	640
MROB_1996	ESALQ_3623	96.72	274	9	0	1	274	1	274	0	537
MROB_1997	ESALQ_3624	97.86	653	14	0	1	653	1	653	0	1315
MROB_1998	ESALQ_3625	99.60	1740	7	0	1	1740	1	1740	0	3527
MROB_2000	ESALQ_3627	99.81	535	1	0	1	535	1	535	0	1118
MROB_2001	ESALQ_3628	98.93	468	5	0	1	468	1	468	0	957
MROB_2002	ESALQ_3629	97.81	365	6	1	1	363	53	417	0	715
MROB_2003	ESALQ_3630	97.77	359	8	0	1	359	1	359	0	734
MROB_2004	ESALQ_3632	97.30	704	19	0	78	781	4	707	0	1432
MROB_2005	ESALQ_3633	98.44	256	4	0	1	256	1	256	0	515
MROB_2006	ESALQ_3634	97.96	343	7	0	1	343	1	343	0	650
MROB_2007	ESALQ_3635	92.42	356	26	1	1	355	1	356	0	641
MROB_2009	ESALQ_3637	99.44	359	2	0	1	359	1	359	0	726
MROB_2010	ESALQ_3638	97.61	503	12	0	1	503	1	503	0	1001
MROB_2012	ESALQ_3639	99.47	2432	13	0	1	2432	1	2432	0	5018
MROB_2014	ESALQ_3641	99.41	512	3	0	1	512	1	512	0	1027
MROB_2015	ESALQ_3642	99.06	319	3	0	1	319	1	319	0	642
MROB_2016	ESALQ_3643	99.78	459	1	0	1	459	1	459	0	957
MROB_2017	ESALQ_3644	99.17	363	3	0	1	363	1	363	0	739
MROB_2018	ESALQ_3645	99.81	517	1	0	1	517	1	517	0	1040
MROB_2022	ESALQ_3928	99.27	958	7	0	1	958	1	958	0	1930
MROB_2024	ESALQ_3926	99.37	317	2	0	55	371	7	323	0	650
MROB_2025	ESALQ_3925	98.72	469	6	0	1	469	1	469	0	972
MROB_2026	ESALQ_3924	97.40	538	14	0	1	538	1	538	0	1069
MROB_2027	ESALQ_3923	99.25	267	2	0	1	267	1	267	0	537
MROB_2028	ESALQ_3922	99.34	454	3	0	1	454	1	454	0	927
MROB_2030	ESALQ_3920	99.60	251	1	0	131	381	1	251	0	519
MROB_2031	ESALQ_3919	95.52	335	13	1	384	718	155	487	0	655
MROB_2032	ESALQ_3918	99.14	350	3	0	1	350	1	350	0	715
MROB_2033	ESALQ_3917	100.00	426	0	0	1	426	1	426	0	884
MROB_2034	ESALQ_3916	88.30	487	44	2	1	474	1	487	0	855
MROB_2035	ESALQ_3915	98.95	569	6	0	1	569	1	569	0	1131
MROB_2036	ESALQ_3914	99.23	1555	12	0	1	1555	1	1555	0	3211
MROB_2038	ESALQ_3912	93.33	884	12	1	1	884	1	837	0	1680
MROB_2040	ESALQ_3910	99.30	573	4	0	1	573	19	591	0	1169
MROB_2041	ESALQ_3909	99.14	347	3	0	1	347	1	347	0	706
MROB_2043	ESALQ_3907	96.23	664	7	1	1	664	1	646	0	1307
MROB_2045	ESALQ_3905	98.71	311	4	0	1	311	1	311	0	638
MROB_2046	ESALQ_3904	99.62	263	1	0	1	263	1	263	0	531
MROB_2047	ESALQ_3903	99.38	481	3	0	1	481	1	481	0	991
MROB_2049	ESALQ_3901	96.91	648	17	1	1	648	638	1282	0	1303
MROB_2050	ESALQ_3901	95.37	626	19	2	1	622	1	620	0	1135
MROB_2051	ESALQ_3900	96.88	353	11	0	1	353	1	353	0	708
MROB_2054	ESALQ_3897	99.61	761	3	0	1	761	1	761	0	1560
MROB_2055	ESALQ_3896	92.86	1022	42	6	13	1024	27	1027	0	1809
MROB_2056	ESALQ_3895	91.48	364	2	2	1	342	1	357	0	681
MROB_2057	ESALQ_3894	98.89	1084	12	0	540	1623	609	1692	0	2216
MROB_2058	ESALQ_3893	99.23	392	3	0	1	392	1	392	0	797
MROB_2059	ESALQ_3892	98.37	860	14	0	1	860	1	860	0	1766
MROB_2060	ESALQ_3891	98.94	470	5	0	1	470	1	470	0	940
MROB_2061	ESALQ_3890	98.99	297	3	0	1	297	1	297	0	602
MROB_2062	ESALQ_3889	95.57	271	12	0	1	271	1	271	0	508
MROB_2063	ESALQ_3888	96.95	688	21	0	1	688	1	688	0	1397
MROB_2064	ESALQ_3887	99.48	581	3	0	1	581	1	581	0	1185
MROB_2065	ESALQ_3886	100.00	271	0	0	1	271	1	271	0	562
MROB_2066	ESALQ_3885	98.34	301	5	0	1	301	1	301	0	603
MROB_2067	ESALQ_3884	98.85	693	8	0	1	693	1	693	0	1429
MROB_2068	ESALQ_3883	97.54	528	10	1	1	525	1	528	0	1030
MROB_2069	ESALQ_3881	98.70	538	7	0	1	538	1	538	0	1091
MROB_2070	ESALQ_3880	93.15	321	22	0	1	321	1	321	0	561
MROB_2071	ESALQ_3879	100.00	648	0	0	1	648	1	648	0	1331
MROB_2072	ESALQ_3878	99.21	378	3	0	1	378	1	378	0	751
MROB_2073	ESALQ_3877	99.18	365	3	0	1	365	1	365	0	719
MROB_2074	ESALQ_3876	99.51	813	4	0	1	813	1	813	0	1668
MROB_2075	ESALQ_3875	99.77	431	1	0	1	431	1	431	0	905
MROB_2077	ESALQ_3873	99.78	447	1	0	1	447	1	447	0	915
MROB_2078	ESALQ_3872	96.33	1144	39	1	1	1141	1	1144	0	2286
MROB_2079	ESALQ_3871	99.26	406	3	0	1	406	1	406	0	815
MROB_2080	ESALQ_3870	100.00	252	0	0	1	252	1	252	0	520
MROB_2081	ESALQ_3869	98.79	494	6	0	1	494	1	494	0	971
MROB_2083	ESALQ_3867	98.96	384	4	0	49	432	467	850	0	768
MROB_2084	ESALQ_3867	99.09	328	3	0	10	337	52	379	0	685
MROB_2085	ESALQ_3866	99.45	733	4	0	1	733	1	733	0	1462
MROB_2087	ESALQ_3864	99.35	462	3	0	1	462	1	462	0	947
MROB_2089	ESALQ_3862	98.89	721	8	0	1	721	1	721	0	1458
MROB_2090	ESALQ_3861	88.32	351	28	3	1	338	1	351	0	569
MROB_2091	ESALQ_3860	100.00	293	0	0	1	293	39	331	0	600
MROB_2092	ESALQ_3859	93.44	442	6	2	1	419	1	442	0	821
MROB_2093	ESALQ_3858	98.40	689	11	0	1	689	1	689	0	1407
MROB_2095	ESALQ_3856	100.00	320	0	0	1	320	1	320	0	669
MROB_2096	ESALQ_3855	94.53	512	28	0	1	512	1	512	0	761
MROB_2097	ESALQ_3854	98.08	313	6	0	1	313	1	313	0	613
MROB_2098	ESALQ_3853	96.76	525	16	1	1	525	1	524	0	1046
MROB_2099	ESALQ_3852	99.56	450	2	0	1	450	103	552	0	913
MROB_2100	ESALQ_3851	100.00	298	0	0	1	298	1	298	0	580
MROB_2101	ESALQ_3850	99.59	490	2	0	1	490	1	490	0	1016
MROB_2103	ESALQ_3847	99.66	1188	4	0	1	1188	1	1188	0	2439
MROB_2104	ESALQ_3846	96.49	827	28	1	4	830	42	867	0	1630
MROB_2106	ESALQ_3844	97.93	386	8	0	1	386	1	386	0	783
MROB_2107	ESALQ_3843	99.74	385	1	0	1	385	1	385	0	789
MROB_2109	ESALQ_3841	98.94	661	7	0	1	661	1	661	0	1312
MROB_2110	ESALQ_3840	100.00	313	0	0	1	313	155	467	0	599
MROB_2111	ESALQ_3839	99.57	695	3	0	1	695	1	695	0	1400
MROB_2112	ESALQ_3838	99.22	516	4	0	1	516	1	516	0	1066
MROB_2113	ESALQ_3837	99.44	357	2	0	1	357	1	357	0	721
MROB_2116	ESALQ_3834	99.87	750	1	0	1	750	1	750	0	1561
MROB_2117	ESALQ_3833	99.25	533	4	0	71	603	180	712	0	1062
MROB_2118	ESALQ_3832	99.12	453	4	0	1	453	1	453	0	649
MROB_2119	ESALQ_3831	96.99	365	11	0	1	365	1	365	0	735
MROB_2120	ESALQ_3830	99.20	250	2	0	1	250	1	250	0	501
MROB_2122	ESALQ_3828	99.71	696	2	0	1	696	1	696	0	1436
MROB_2124	ESALQ_3826	99.17	846	7	0	1	846	1	846	0	1703
MROB_2125	ESALQ_3825	95.35	258	12	0	1	258	1	258	0	511
MROB_2128	ESALQ_3822	99.34	455	3	0	43	497	1	455	0	943
MROB_2129	ESALQ_3821	99.59	483	2	0	1	483	1	483	0	1000
MROB_2131	ESALQ_3819	99.69	324	1	0	1	324	1	324	0	664
MROB_2132	ESALQ_3818	100.00	607	0	0	1	607	257	863	0	1246
MROB_2134	ESALQ_3817	96.21	528	1	1	1	509	1	528	0	1044
MROB_2135	ESALQ_3815	98.98	684	7	0	1	684	1	684	0	1390
MROB_2136	ESALQ_3814	92.08	303	24	0	1	303	1	303	0	566
MROB_2138	ESALQ_3812	97.69	648	15	0	1	648	1	648	0	1318
MROB_2140	ESALQ_3809	97.12	938	27	0	1	938	1	938	0	1871
MROB_2141	ESALQ_3808	98.15	324	6	0	1	324	1	324	0	663
MROB_2142	ESALQ_3807	98.97	1354	14	0	1	1354	1	1354	0	2768
MROB_2144	ESALQ_3804	98.38	741	11	1	1	741	1	740	0	1523
MROB_2145	ESALQ_3803	100.00	345	0	0	1	345	1	345	0	719
MROB_2147	ESALQ_3801	99.81	519	1	0	1	519	1	519	0	1076
MROB_2148	ESALQ_3800	99.36	312	2	0	1	312	1	312	0	606
MROB_2149	ESALQ_3799	99.29	844	6	0	1	844	1	844	0	1734
MROB_2150	ESALQ_3798	99.43	349	2	0	1	349	1	349	0	712
MROB_2151	ESALQ_3797	99.01	505	5	0	317	821	1	505	0	1037
MROB_2152	ESALQ_3796	100.00	271	0	0	41	311	11	281	0	556
MROB_2153	ESALQ_3795	89.49	1009	76	3	1	1009	1	979	0	1810
MROB_2154	ESALQ_3794	99.79	1874	4	0	1	1874	1	1874	0	3880
MROB_2156	ESALQ_3792	98.36	1771	28	1	453	2222	615	2385	0	3646
MROB_2157	ESALQ_3791	98.27	521	9	0	1	521	1	521	0	1036
MROB_2158	ESALQ_3790	97.90	572	12	0	1	572	1	572	0	1142
MROB_2162	ESALQ_3786	95.39	1084	13	3	1	1048	1	1083	0	2115
MROB_2164	ESALQ_3785	98.37	430	7	0	1	430	1	430	0	858
MROB_2165	ESALQ_3784	97.46	512	7	1	1	512	1	506	0	1036
MROB_2166	ESALQ_3783	99.20	373	3	0	1	373	1	373	0	764
MROB_2167	ESALQ_3782	99.65	284	1	0	1	284	1	284	0	587
MROB_2168	ESALQ_3780	98.76	643	7	1	38	679	906	1548	0	1298
MROB_2169	ESALQ_3780	97.39	767	17	1	1	764	43	809	0	1532
MROB_2170	ESALQ_3779	99.16	356	3	0	1	356	1	356	0	708
MROB_2172	ESALQ_3778	98.11	423	6	1	1	423	1	421	0	784
MROB_2173	ESALQ_3777	88.63	422	10	1	15	398	32	453	0	753
MROB_2174	ESALQ_3775	98.35	605	10	0	523	1127	1	605	0	1248
MROB_2175	ESALQ_3774	70.33	482	133	6	1	478	1	476	0	644
MROB_2176	ESALQ_3773	93.89	2274	68	6	1	2207	1	2270	0	4354
MROB_2178	ESALQ_3771	99.00	299	3	0	1	299	1	299	0	617
MROB_2179	ESALQ_3770	92.48	665	25	1	1	665	1	640	0	1269
MROB_2181	ESALQ_3764	88.90	1000	64	4	1	954	1	999	0	1772
MROB_2183	ESALQ_3766	95.52	536	19	1	1	536	1	531	0	1057
MROB_2184	ESALQ_3767	96.35	384	14	0	1	384	1	384	0	763
MROB_2186	ESALQ_3769	97.57	576	14	0	1	576	1	576	0	1168
MROB_2190	ESALQ_3761	96.23	451	11	1	1	451	1	445	0	879
MROB_2191	ESALQ_3760	91.22	319	28	0	1	319	1	319	0	620
MROB_2192	ESALQ_3759	84.86	317	48	0	1	317	1	317	0	536
MROB_2194	ESALQ_3757	99.25	401	3	0	1	401	1	401	0	829
MROB_2195	ESALQ_3756	97.17	565	9	1	1	565	1	558	0	1076
MROB_2196	ESALQ_3755	97.56	369	8	1	1	369	1	368	0	721
MROB_2198	ESALQ_3753	99.22	510	4	0	1	510	1	510	0	1018
MROB_2199	ESALQ_3752	99.69	1281	4	0	1	1281	1	1281	0	2602
MROB_2200	ESALQ_3751	86.88	686	88	1	79	764	1	684	0	1243
MROB_2201	ESALQ_3750	98.99	690	1	1	1	690	1	684	0	1409
MROB_2202	ESALQ_3749	98.92	557	6	0	1	557	1	557	0	1140
MROB_2203	ESALQ_3748	97.64	423	10	0	1	423	1	423	0	857
MROB_2204	ESALQ_3746	99.70	334	1	0	1	334	1	334	0	680
MROB_2206	ESALQ_3744	95.99	374	15	0	1	374	1	374	0	741
MROB_2208	ESALQ_3743	98.57	280	4	0	1	280	249	528	0	555
MROB_2209	ESALQ_3742	99.06	318	3	0	1	318	1	318	0	654
MROB_2210	ESALQ_3741	95.95	296	12	0	168	463	1	296	0	585
MROB_2212	ESALQ_3737	97.39	499	13	0	1	499	1	499	0	983
MROB_2213	ESALQ_3736	98.11	477	9	0	1	477	1	477	0	979
MROB_2214	ESALQ_3735	97.58	289	7	0	1	289	1	289	0	574
MROB_2216	ESALQ_3733	96.90	612	10	1	1	612	1	603	0	1231
MROB_2217	ESALQ_3732	96.98	496	6	1	1	496	6	492	0	987
MROB_2218	ESALQ_3731	88.59	447	3	2	1	423	1	423	0	750
MROB_2220	ESALQ_3729	99.86	714	1	0	1	714	1	714	0	1482
MROB_2221	ESALQ_3728	99.38	323	2	0	1	323	1	323	0	656
MROB_2222	ESALQ_3727	98.83	342	4	0	1	342	1	342	0	686
MROB_2223	ESALQ_3726	92.56	430	2	3	1	410	1	420	0	729
MROB_2225	ESALQ_3724	98.88	446	5	0	155	600	1	446	0	913
MROB_2226	ESALQ_3723	98.51	807	12	0	1	807	1	807	0	1637
MROB_2228	ESALQ_3721	99.21	254	2	0	1	254	1	254	0	528
MROB_2229	ESALQ_3720	95.71	326	14	0	1	326	1	326	0	647
MROB_2230	ESALQ_3719	96.02	528	6	1	1	513	1	528	0	1013
MROB_2231	ESALQ_3718	97.56	657	12	3	1	654	1	656	0	1296
MROB_2232	ESALQ_3717	98.42	506	1	1	1	506	1	499	0	1024
MROB_2234	ESALQ_3715	100.00	495	0	0	1	495	1	495	0	1005
MROB_2235	ESALQ_3714	98.87	354	4	0	1	354	1	354	0	719
MROB_2240	ESALQ_3710	79.49	356	23	3	98	453	15	320	0	548
MROB_2241	ESALQ_3708	99.18	1467	12	0	1	1467	1	1467	0	3004
MROB_2242	ESALQ_3707	99.66	293	1	0	1	293	1	293	0	594
MROB_2243	ESALQ_3706	90.64	812	48	4	1	811	1	785	0	1479
MROB_2244	ESALQ_3705	91.19	477	42	0	1	477	1	477	0	885
MROB_2245	ESALQ_3704	99.13	345	3	0	14	358	14	358	0	689
MROB_2247	ESALQ_3702	84.12	611	93	3	1	611	1	607	0	1029
MROB_2248	ESALQ_3700	86.76	491	54	2	1	491	1	480	0	838
MROB_2249	ESALQ_3699	97.00	333	10	0	8	340	73	405	0	651
MROB_2252	ESALQ_3696	96.34	382	14	0	1	382	1	382	0	760
MROB_2254	ESALQ_3694	90.73	313	7	1	1	291	1	313	0	569
MROB_2255	ESALQ_3693	93.20	353	24	0	1	353	1	353	0	685
MROB_2256	ESALQ_3692	87.11	318	41	0	64	381	9	326	0	580
MROB_2258	ESALQ_3691	99.72	362	1	0	1	362	1	362	0	732
MROB_2261	ESALQ_3687	96.71	395	13	0	1	395	1	395	0	780
MROB_2262	ESALQ_3686	98.01	602	10	1	1	600	1	602	0	1198
MROB_2265	ESALQ_3683	95.11	2472	86	2	1	2470	1	2439	0	4877
MROB_2267	ESALQ_3681	97.57	453	11	0	1	453	1	453	0	911
MROB_2268	ESALQ_3680	97.93	338	7	0	1	338	1	338	0	701
MROB_2269	ESALQ_3679	98.44	578	9	0	1	578	1	578	0	1181
MROB_2270	ESALQ_3678	96.89	644	20	0	1	644	18	661	0	1289
MROB_2271	ESALQ_3677	87.56	394	40	2	1	390	1	389	0	708
MROB_2272	ESALQ_3676	89.71	651	24	1	1	608	1	651	0	1172
MROB_2273	ESALQ_3675	100.00	517	0	0	1	517	1	517	0	1046
MROB_2274	ESALQ_3674	99.65	285	1	0	1	285	9	293	0	579
MROB_2275	ESALQ_3673	99.73	733	2	0	1	733	1	733	0	1525
MROB_2276	ESALQ_3672	98.03	356	7	0	1	356	1	356	0	710
MROB_2277	ESALQ_3671	99.60	248	1	0	1	248	1	248	0	517
MROB_2278	ESALQ_3670	96.37	524	19	0	1	524	1	524	0	1011
MROB_2280	ESALQ_3668	99.07	429	4	0	1	429	1	429	0	882
MROB_2282	ESALQ_3666	97.79	9397	206	2	1	9396	1	9396	0	18964
MROB_2283	ESALQ_3665	98.12	532	10	0	1	532	1	532	0	1075
MROB_2285	ESALQ_3663	95.09	285	14	0	1	285	1	285	0	561
MROB_2286	ESALQ_3662	98.67	451	6	0	1	451	1	451	0	903
MROB_2287	ESALQ_3661	95.84	625	26	0	1	625	61	685	0	928
MROB_2289	ESALQ_3659	99.45	366	2	0	1	366	1	366	0	736
MROB_2291	ESALQ_5868	98.50	1804	23	1	1	1800	1	1804	0	3641
MROB_2293	ESALQ_5870	99.22	514	4	0	1	514	1	514	0	1048
MROB_2294	ESALQ_5871	77.35	574	32	5	1	564	1	486	0	798
MROB_2295	ESALQ_5872	98.48	1384	21	0	1	1384	1	1384	0	2833
MROB_2296	ESALQ_5873	96.01	577	7	1	1	577	1	561	0	1133
MROB_2297	ESALQ_5874	99.86	693	1	0	45	737	1	693	0	1434
MROB_2298	ESALQ_5875	98.72	783	9	1	1	782	1	783	0	1595
MROB_2299	ESALQ_5877	99.44	360	2	0	139	498	1	360	0	748
MROB_2300	ESALQ_5878	96.86	350	11	0	1	350	1	350	0	689
MROB_2301	ESALQ_5879	95.22	920	44	0	1	920	1	920	0	1742
MROB_2302	ESALQ_5880	97.92	626	13	0	1	626	1	626	0	1268
MROB_2304	ESALQ_5881	97.36	908	23	1	1	908	1	907	0	1821
MROB_2305	ESALQ_5882	98.67	452	4	1	1	452	1	450	0	920
MROB_2306	ESALQ_5883	99.04	314	3	0	34	347	1	314	0	646
MROB_2307	ESALQ_5884	96.80	500	13	1	55	551	56	555	0	980
MROB_2308	ESALQ_5884	94.49	726	39	1	1	725	571	1296	0	1383
MROB_2309	ESALQ_5884	80.74	675	130	0	1	675	1378	2052	0	1108
MROB_2310	ESALQ_5885	96.03	453	18	0	1	453	1	453	0	900
MROB_2311	ESALQ_5886	97.35	528	14	0	1	528	1	528	0	1074
MROB_2312	ESALQ_5887	95.80	667	17	3	1	666	1	657	0	1290
MROB_2313	ESALQ_5888	91.22	319	28	0	1	319	1	319	0	598
MROB_2314	ESALQ_5889	96.45	366	13	0	78	443	11	376	0	731
MROB_2317	ESALQ_5892	99.71	342	1	0	1	342	1	342	0	711
MROB_2318	ESALQ_5893	99.59	489	2	0	1	489	1	489	0	998
MROB_2319	ESALQ_5894	97.67	944	4	1	1	944	1	926	0	1889
MROB_2321	ESALQ_5896	99.72	356	1	0	1	356	1	356	0	723
MROB_2322	ESALQ_5897	100.00	363	0	0	1	363	1	363	0	757
MROB_2324	ESALQ_5899	97.04	338	10	0	1	338	1	338	0	666
MROB_2325	ESALQ_5900	98.94	564	6	0	1	564	1	564	0	1139
MROB_2326	ESALQ_5901	98.86	1145	11	1	1	1143	1	1145	0	2269
MROB_2327	ESALQ_5902	99.28	1659	12	0	1	1659	1	1659	0	3358
MROB_2328	ESALQ_5903	99.83	589	1	0	1	589	1	589	0	1162
MROB_2329	ESALQ_5904	99.96	2285	1	0	1	2285	1	2285	0	4733
MROB_2331	ESALQ_5906	98.94	564	6	0	1	564	1	564	0	1137
MROB_2333	ESALQ_5908	99.23	392	3	0	1	392	1	392	0	810
MROB_2335	ESALQ_5910	99.30	287	2	0	1	287	1	287	0	586
MROB_2336	ESALQ_5911	99.68	308	1	0	1	308	1	308	0	639
MROB_2337	ESALQ_5912	98.71	929	12	0	1	929	1	929	0	1899
MROB_2339	ESALQ_5914	99.67	1526	5	0	1	1526	1	1526	0	3134
MROB_2343	ESALQ_5918	96.40	389	0	2	1	375	1	389	0	733
MROB_2344	ESALQ_5919	99.61	1031	0	1	1	1031	1	1027	0	2004
MROB_2346	ESALQ_5921	99.80	1017	2	0	1	1017	1	1017	0	2090
MROB_2347	ESALQ_5921	97.61	460	9	1	1	460	1062	1519	0	955
MROB_2348	ESALQ_5922	92.17	447	20	1	1	447	45	476	0	846
MROB_2349	ESALQ_5923	98.75	481	6	0	1	481	1	481	0	975
MROB_2350	ESALQ_5924	98.15	324	6	0	1	324	1	324	0	637
MROB_2351	ESALQ_5925	97.65	1449	32	2	1	1448	1	1448	0	2737
MROB_2352	ESALQ_5926	99.17	362	3	0	1	362	1	362	0	735
MROB_2353	ESALQ_5927	97.36	605	16	0	1	605	1	605	0	1201
MROB_2354	ESALQ_5928	98.27	519	6	1	24	542	21	536	0	1058
MROB_2355	ESALQ_5929	99.63	546	2	0	1	546	1	546	0	1062
MROB_2357	ESALQ_5931	99.03	308	3	0	1	308	1	308	0	632
MROB_2358	ESALQ_5932	98.66	522	7	0	1	522	1	522	0	1055
MROB_2359	ESALQ_5933	98.06	361	7	0	196	556	8	368	0	665
MROB_2360	ESALQ_5934	96.33	463	17	0	1	463	1	463	0	905
MROB_2363	ESALQ_5937	93.27	698	46	1	1	698	1	697	0	1319
MROB_2365	ESALQ_5939	99.13	806	7	0	1	806	1	806	0	1658
MROB_2366	ESALQ_5940	99.57	698	3	0	1	698	1	698	0	1434
MROB_2367	ESALQ_5941	99.51	614	3	0	1	614	1	614	0	1248
MROB_2368	ESALQ_5942	100.00	302	0	0	1	302	1	302	0	616
MROB_2369	ESALQ_5943	97.80	1500	24	1	1	1500	1	1491	0	2951
MROB_2370	ESALQ_5944	98.26	574	10	0	1	574	1	574	0	1175
MROB_2371	ESALQ_5945	97.58	331	8	0	1	331	1	331	0	677
MROB_2372	ESALQ_5946	100.00	247	0	0	1	247	1	247	0	501
MROB_2374	ESALQ_5948	99.76	418	1	0	1	418	1	418	0	749
MROB_2375	ESALQ_5949	98.53	273	4	0	1	273	1	273	0	556
MROB_2376	ESALQ_5950	98.14	537	3	2	1	530	1	537	0	932
MROB_2378	ESALQ_5952	100.00	411	0	0	1	411	1	411	0	847
MROB_2380	ESALQ_5954	100.00	412	0	0	1	412	1	412	0	845
MROB_2381	ESALQ_5955	96.71	852	5	1	1	829	1	852	0	1697
MROB_2383	ESALQ_5957	85.60	1174	49	12	1	1106	1	1122	0	1997
MROB_2385	ESALQ_5959	98.57	279	4	0	1	279	1	279	0	540
MROB_2386	ESALQ_5960	99.66	592	2	0	1	592	1	592	0	1218
MROB_2387	ESALQ_5961	100.00	347	0	0	1	347	1	347	0	701
MROB_2388	ESALQ_5962	95.46	683	8	1	1	660	1	683	0	1352
MROB_2389	ESALQ_5963	99.73	364	1	0	1	364	1	364	0	747
MROB_2390	ESALQ_5964	99.13	343	3	0	1	343	1	343	0	679
MROB_2392	ESALQ_5966	99.55	670	3	0	1	670	1	670	0	1378
MROB_2393	ESALQ_5967	97.27	477	13	0	1	477	1	477	0	967
MROB_2396	ESALQ_5970	98.71	542	7	0	1	542	11	552	0	1084
MROB_2397	ESALQ_5971	99.03	310	3	0	1	310	1	310	0	634
MROB_2398	ESALQ_5972	99.11	451	4	0	1	451	1	451	0	937
MROB_2399	ESALQ_5973	90.91	451	27	1	117	553	64	514	0	840
MROB_2401	ESALQ_5975	96.99	266	8	0	1	266	1	266	0	540
MROB_2402	ESALQ_5976	92.84	754	21	1	1	754	1	721	0	1425
MROB_2404	ESALQ_5977	95.21	438	17	1	1	438	344	777	0	800
MROB_2405	ESALQ_5979	99.31	432	3	0	1	432	1	432	0	876
MROB_2406	ESALQ_5980	97.71	350	7	1	1	350	1	349	0	659
MROB_2407	ESALQ_5981	99.64	831	3	0	1	831	1	831	0	1684
MROB_2408	ESALQ_5982	98.43	1145	18	0	1	1145	1	1145	0	2317
MROB_2411	ESALQ_5985	99.46	559	3	0	1	559	1	559	0	1108
MROB_2412	ESALQ_5986	97.23	904	25	0	138	1041	1	904	0	1838
MROB_2413	ESALQ_5987	98.62	650	9	0	1	650	1	650	0	1352
MROB_2415	ESALQ_5988	98.88	535	5	1	1	534	1	535	0	1084
MROB_2416	ESALQ_5989	98.87	709	8	0	1	709	1	709	0	1431
MROB_2421	ESALQ_5993	99.63	1613	6	0	1	1613	1	1613	0	3266
MROB_2422	ESALQ_5994	99.35	307	2	0	1	307	1	307	0	617
MROB_2423	ESALQ_5995	98.91	640	7	0	1	640	1	640	0	1308
MROB_2424	ESALQ_5996	99.18	368	3	0	1	368	1	368	0	739
MROB_2425	ESALQ_5997	83.72	436	34	3	1	399	1	436	0	690
MROB_2426	ESALQ_5998	85.62	730	52	5	1	688	1	719	0	1218
MROB_2427	ESALQ_5999	99.63	809	3	0	1	809	1	809	0	1655
MROB_2429	ESALQ_6002	95.53	380	17	0	1	380	1	380	0	692
MROB_2430	ESALQ_6003	99.67	303	1	0	1	303	1	303	0	607
MROB_2431	ESALQ_6004	99.76	845	2	0	49	893	2	846	0	1696
MROB_2432	ESALQ_6005	99.66	1165	4	0	1	1165	1	1165	0	2411
MROB_2434	ESALQ_6006	100.00	324	0	0	1	324	1	324	0	671
MROB_2438	ESALQ_6010	99.90	1042	0	1	1	1041	1	1042	0	2118
MROB_2439	ESALQ_6011	96.63	683	6	2	1	682	1	667	0	1292
MROB_2440	ESALQ_6012	98.07	311	6	0	1	311	1	311	0	624
MROB_2442	ESALQ_6014	99.93	1476	1	0	1	1476	1	1476	0	2888
MROB_2443	ESALQ_6015	100.00	322	0	0	1	322	1	322	0	637
MROB_2444	ESALQ_6016	99.64	563	2	0	1	563	1	563	0	1149
MROB_2445	ESALQ_6017	98.66	1042	14	0	43	1084	1	1042	0	2119
MROB_2446	ESALQ_6018	99.75	1212	3	0	1	1212	1	1212	0	2496
MROB_2447	ESALQ_6019	97.70	261	6	0	1	261	1	261	0	532
MROB_2448	ESALQ_6020	98.76	403	5	0	1	403	1	403	0	783
MROB_2450	ESALQ_6022	99.37	315	2	0	1	315	1	315	0	654
MROB_2451	ESALQ_6023	100.00	522	0	0	1	522	1	522	0	1016
MROB_2452	ESALQ_6024	98.48	330	5	0	1	330	1	330	0	674
MROB_2453	ESALQ_6025	98.76	323	4	0	32	354	1	323	0	662
MROB_2454	ESALQ_6026	99.23	521	4	0	1	521	1	521	0	1085
MROB_2455	ESALQ_6027	99.13	690	6	0	1	690	1	690	0	1394
MROB_2456	ESALQ_6028	98.56	485	7	0	1	485	1	485	0	986
MROB_2457	ESALQ_6029	99.70	329	1	0	1	329	1	329	0	668
MROB_2458	ESALQ_6030	99.61	254	1	0	1	254	1	254	0	526
MROB_2460	ESALQ_6032	98.56	4943	71	0	1	4943	1	4943	0	9988
MROB_2462	ESALQ_6034	100.00	562	0	0	1	562	1	562	0	1144
MROB_2463	ESALQ_6035	97.70	261	6	0	1	261	1	261	0	524
MROB_2464	ESALQ_6036	99.28	1803	13	0	1	1803	1	1803	0	3677
MROB_2465	ESALQ_6037	95.01	481	24	0	1	481	1	481	0	955
MROB_2466	ESALQ_6038	98.97	487	5	0	1	487	1	487	0	1001
MROB_2467	ESALQ_6040	100.00	290	0	0	1	290	1	290	0	600
MROB_2468	ESALQ_6041	98.69	842	11	0	1	842	1	842	0	1708
MROB_2469	ESALQ_6042	97.92	385	8	0	1	385	1	385	0	722
MROB_2470	ESALQ_6043	98.73	395	5	0	1	395	1	395	0	797
MROB_2472	ESALQ_6045	91.93	905	3	2	1	835	1	905	0	1698
MROB_2473	ESALQ_6046	99.46	559	3	0	1	559	1	559	0	1153
MROB_2474	ESALQ_6047	99.37	478	3	0	1	478	1	478	0	988
MROB_2476	ESALQ_6049	98.52	270	4	0	1	270	1	270	0	556
MROB_2477	ESALQ_6050	87.65	567	12	3	1	567	1	509	0	988
MROB_2478	ESALQ_6051	97.93	725	5	1	1	715	1	725	0	1433
MROB_2479	ESALQ_6052	99.13	921	8	0	1	921	1	921	0	1882
MROB_2481	ESALQ_6054	100.00	827	0	0	1	827	1	827	0	1719
MROB_2483	ESALQ_6056	80.43	562	8	3	1	527	1	495	0	877
MROB_2484	ESALQ_6057	98.48	593	8	1	1	593	1	592	0	1128
MROB_2485	ESALQ_6058	97.62	505	11	1	1	504	1	505	0	976
MROB_2486	ESALQ_6059	98.45	1162	17	1	1	1161	1	1162	0	2333
MROB_2487	ESALQ_6060	86.67	705	21	4	5	636	1	705	0	1204
MROB_2489	ESALQ_6062	98.81	503	6	0	1	503	1	503	0	1031
MROB_2490	ESALQ_6063	98.39	1681	25	1	1	1679	1	1681	0	3325
MROB_2491	ESALQ_6064	99.67	603	2	0	1	603	1	603	0	1254
MROB_2492	ESALQ_6065	99.45	547	3	0	1	547	1	547	0	1126
MROB_2493	ESALQ_6066	91.51	483	15	1	1	483	1	457	0	809
MROB_2494	ESALQ_6067	99.08	543	5	0	1	543	1	543	0	1119
MROB_2495	ESALQ_6068	99.65	571	2	0	1	571	1	571	0	1149
MROB_2496	ESALQ_6069	98.46	259	4	0	1	259	1	259	0	530
MROB_2498	ESALQ_6070	99.78	1360	3	0	1	1360	1	1360	0	2768
MROB_2499	ESALQ_6071	99.50	605	3	0	1	605	1	605	0	1241
MROB_2500	ESALQ_6072	99.86	701	1	0	1	701	1	701	0	1457
MROB_2502	ESALQ_6074	98.77	325	4	0	1	325	1	325	0	641
MROB_2503	ESALQ_6075	89.79	950	38	2	1	891	1	950	0	1733
MROB_2504	ESALQ_6076	99.93	1416	1	0	1	1416	1	1416	0	2937
MROB_2505	ESALQ_6077	92.27	362	3	2	1	337	1	362	0	670
MROB_2507	ESALQ_6079	95.10	367	18	0	1	367	1	367	0	723
MROB_2508	ESALQ_6080	98.97	292	3	0	1	292	1	292	0	598
MROB_2509	ESALQ_6081	98.67	377	5	0	1	377	1	377	0	766
MROB_2511	ESALQ_6083	98.02	504	9	1	1	503	1	504	0	1003
MROB_2512	ESALQ_6084	98.42	379	6	0	1	379	1	379	0	771
MROB_2515	ESALQ_6088	99.45	549	3	0	1	549	1	549	0	1083
MROB_2516	ESALQ_6089	100.00	550	0	0	1	550	1	550	0	1135
MROB_2517	ESALQ_6090	99.04	730	7	0	1	730	1	730	0	1484
MROB_2518	ESALQ_6091	99.63	535	2	0	1	535	1	535	0	1082
MROB_2520	ESALQ_6093	98.95	475	5	0	1	475	1	475	0	962
MROB_2521	ESALQ_6094	98.25	627	11	0	1	627	1	627	0	1298
MROB_2525	ESALQ_6098	98.58	423	6	0	1	423	1	423	0	862
MROB_2527	ESALQ_6100	99.54	651	3	0	1	651	1	651	0	1324
MROB_2528	ESALQ_6101	99.40	336	2	0	1	336	1	336	0	687
MROB_2529	ESALQ_6102	100.00	1202	0	0	1	1202	1	1202	0	2435
MROB_2530	ESALQ_6103	99.63	1895	7	0	1	1895	1	1895	0	3890
MROB_2531	ESALQ_6104	93.62	486	9	2	1	482	1	468	0	885
MROB_2532	ESALQ_6105	97.03	370	11	0	1	370	1	370	0	734
MROB_2534	ESALQ_6107	99.07	432	4	0	1	432	1	432	0	867
MROB_2535	ESALQ_6108	92.48	505	13	1	1	505	1	480	0	944
MROB_2536	ESALQ_6109	94.53	457	5	1	1	457	1	437	0	873
MROB_2537	ESALQ_6109	97.83	277	5	1	5	281	497	772	0	545
MROB_2538	ESALQ_6110	99.15	354	3	0	1	354	1	354	0	723
MROB_2539	ESALQ_6111	99.85	1353	2	0	1	1353	1	1353	0	2817
MROB_2541	ESALQ_6113	97.36	531	14	0	1	531	1	531	0	1064
MROB_2543	ESALQ_6115	99.66	290	1	0	1	290	1	290	0	596
MROB_2544	ESALQ_6116	96.35	274	10	0	1	274	1	274	0	547
MROB_2545	ESALQ_6117	99.82	552	1	0	1	552	1	552	0	1132
MROB_2546	ESALQ_6118	98.38	494	8	0	1	494	1	494	0	1016
MROB_2547	ESALQ_6119	97.70	478	9	1	1	476	1	478	0	898
MROB_2548	ESALQ_6120	96.01	676	23	1	1	672	1	676	0	1272
MROB_2549	ESALQ_6121	99.58	715	3	0	1	715	1	715	0	1462
MROB_2550	ESALQ_6122	98.51	537	8	0	1	537	1	537	0	1090
MROB_2551	ESALQ_6123	95.74	258	10	1	1	258	1	257	0	505
MROB_2552	ESALQ_6124	100.00	524	0	0	1	524	1	524	0	1086
MROB_2554	ESALQ_6126	100.00	547	0	0	1	547	181	727	0	1117
MROB_2555	ESALQ_6127	99.83	1166	2	0	1	1166	1	1166	0	2388
MROB_2556	ESALQ_6128	97.08	274	8	0	1	274	1	274	0	521
MROB_2557	ESALQ_6129	88.16	304	10	2	1	284	1	298	0	529
MROB_2558	ESALQ_6130	94.35	566	32	0	1	566	1	566	0	1078
MROB_2559	ESALQ_6132	100.00	460	0	0	2	461	1	460	0	932
MROB_2560	ESALQ_6133	95.82	383	16	0	1	383	1	383	0	570
MROB_2561	ESALQ_6134	96.25	586	19	1	1	583	1	586	0	1092
MROB_2562	ESALQ_6135	99.70	657	2	0	1	657	1	657	0	1318
MROB_2563	ESALQ_6136	98.71	311	4	0	1	311	1	311	0	569
MROB_2564	ESALQ_6137	99.48	1343	3	1	1	1339	1	1343	0	2751
MROB_2565	ESALQ_6138	98.07	363	7	0	1	363	1	363	0	723
MROB_2567	ESALQ_6140	93.67	664	18	1	1	640	1	664	0	1278
MROB_2568	ESALQ_6141	97.62	588	13	1	1	587	1	588	0	1180
MROB_2570	ESALQ_6142	98.42	570	9	0	1	570	1	570	0	1150
MROB_2572	ESALQ_6145	94.93	690	35	0	72	761	1	690	0	1117
MROB_2573	ESALQ_6146	99.28	553	4	0	1	553	1	553	0	1132
MROB_2574	ESALQ_6147	99.23	261	2	0	1	261	1	261	0	530
MROB_2575	ESALQ_6148	98.38	494	7	1	1	494	1	493	0	959
MROB_2576	ESALQ_6149	98.21	670	12	0	1	670	1	670	0	1310
MROB_2577	ESALQ_6150	97.48	713	16	2	4	716	119	829	0	1419
MROB_2578	ESALQ_6151	99.05	528	5	0	75	602	1	528	0	1071
MROB_2579	ESALQ_6152	99.55	895	4	0	1	895	1	895	0	1840
MROB_2580	ESALQ_6153	98.66	372	1	1	1	372	1	368	0	746
MROB_2581	ESALQ_6154	99.52	413	2	0	1	413	1	413	0	838
MROB_2582	ESALQ_6155	99.26	814	6	0	1	814	1	814	0	1641
MROB_2584	ESALQ_6156	97.11	1176	29	3	1	1171	1	1176	0	2139
MROB_2586	ESALQ_6158	97.80	318	7	0	313	630	1	318	0	640
MROB_2587	ESALQ_6160	99.81	1048	2	0	1	1048	1	1048	0	2169
MROB_2588	ESALQ_6161	96.39	1108	3	1	1	1071	1	1108	0	2181
MROB_2590	ESALQ_6163	98.69	689	9	0	1	689	1	689	0	1403
MROB_2591	ESALQ_6164	100.00	316	0	0	1	316	1	316	0	653
MROB_2592	ESALQ_6165	97.49	319	7	1	1	318	1	319	0	639
MROB_2593	ESALQ_6166	98.45	323	5	0	1	323	1	323	0	650
MROB_2594	ESALQ_6168	99.48	381	2	0	1	381	1	381	0	776
MROB_2595	ESALQ_6169	93.38	272	18	0	1	272	1	272	0	526
MROB_2596	ESALQ_6170	99.32	293	2	0	1	293	1	293	0	603
MROB_2597	ESALQ_6171	98.67	603	8	0	1	603	1	603	0	1217
MROB_2598	ESALQ_6172	98.20	555	10	0	1	555	1	555	0	1037
MROB_2599	ESALQ_6173	97.23	325	1	2	1	318	1	324	0	627
MROB_2600	ESALQ_6174	98.82	423	5	0	1	423	1	423	0	868
MROB_2601	ESALQ_6175	99.35	307	2	0	1	307	1	307	0	642
MROB_2602	ESALQ_6176	100.00	402	0	0	1	402	1	402	0	820
MROB_2605	ESALQ_6178	95.32	662	31	0	1	662	1	662	0	1259
MROB_2606	ESALQ_6179	99.88	848	1	0	1	848	1	848	0	1754
MROB_2607	ESALQ_6180	99.74	1155	3	0	1	1155	1	1155	0	2373
MROB_2608	ESALQ_6181	98.74	1192	8	2	1	1190	1	1187	0	2318
MROB_2609	ESALQ_6182	98.32	417	5	1	1	417	1	415	0	803
MROB_2610	ESALQ_6183	99.87	748	1	0	1	748	1	748	0	1538
MROB_2611	ESALQ_6184	98.08	1509	25	1	1	1509	1	1505	0	2949
MROB_2612	ESALQ_6185	97.24	399	11	0	62	460	1	399	0	743
MROB_2613	ESALQ_6187	99.83	604	1	0	1	604	1	604	0	1232
MROB_2614	ESALQ_6188	99.75	1178	3	0	1	1178	1	1178	0	2418
MROB_2615	ESALQ_6189	99.36	313	2	0	1	313	1	313	0	636
MROB_2617	ESALQ_6190	99.42	1202	7	0	1	1202	1	1202	0	2464
MROB_2618	ESALQ_6191	97.62	1471	32	2	1	1469	1	1470	0	2747
MROB_2620	ESALQ_6193	99.34	756	5	0	1	756	1	756	0	1510
MROB_2622	ESALQ_6195	99.62	531	2	0	1	531	1	531	0	1080
MROB_2624	ESALQ_6197	96.36	660	8	1	1	660	1	644	0	1308
MROB_2625	ESALQ_6198	99.59	487	2	0	1	487	1	487	0	999
MROB_2626	ESALQ_6199	99.54	436	2	0	1	436	1	436	0	870
MROB_2631	ESALQ_6204	97.19	853	5	1	1	853	1	834	0	1714
MROB_2632	ESALQ_6205	99.70	336	1	0	1	336	1	336	0	688
MROB_2634	ESALQ_6206	100.00	254	0	0	1	254	1	254	0	514
MROB_2635	ESALQ_6207	99.66	589	2	0	1	589	1	589	0	1201
MROB_2637	ESALQ_6209	100.00	435	0	0	1	435	1	435	0	890
MROB_2638	ESALQ_6210	99.63	1367	5	0	1	1367	1	1367	0	2827
MROB_2639	ESALQ_6211	98.79	661	8	0	1	661	1	661	0	1341
MROB_2640	ESALQ_6212	97.73	1539	35	0	1	1539	1	1539	0	3080
MROB_2642	ESALQ_6214	97.25	437	11	1	1	436	1	437	0	863
MROB_2645	ESALQ_6217	99.19	494	4	0	1	494	1	494	0	1026
MROB_2646	ESALQ_6218	99.12	341	3	0	1	341	1	341	0	692
MROB_2647	ESALQ_6219	97.20	787	6	1	1	771	1	787	0	1577
MROB_2648	ESALQ_6220	99.56	903	4	0	1	903	1	903	0	1871
MROB_2649	ESALQ_6221	98.92	1567	16	1	3	1568	2	1568	0	3190
MROB_2650	ESALQ_2132	99.71	1048	3	0	1	1048	1	1048	0	2175
MROB_2654	ESALQ_2128	100.00	264	0	0	1	264	157	420	0	553
[truncated: 9,129 more rows]

## Sheet: ESALQ_MROB_pairs
Query_ESALQ_strain1638	Target_M.robertsii_ARSEF23
ESALQ_10	MROB_3925
ESALQ_100	MROB_4019
ESALQ_1000	MROB_1783
ESALQ_10000	MROB_6361
ESALQ_10001	MROB_6362
ESALQ_10002	MROB_6363
ESALQ_10003	MROB_6364
ESALQ_10004	MROB_6365
ESALQ_10005	MROB_6366
ESALQ_10006	MROB_6367
ESALQ_10007	MROB_6368
ESALQ_10008	MROB_6369
ESALQ_10009	MROB_6370
ESALQ_1001	MROB_1784
ESALQ_10010	MROB_6371
ESALQ_10011	MROB_6373
ESALQ_10013	MROB_6374
ESALQ_10014	MROB_6375
ESALQ_10015	MROB_10134
ESALQ_10016	MROB_6376
ESALQ_10017	MROB_6377
ESALQ_10018	MROB_6378
ESALQ_1002	MROB_1785
ESALQ_10020	MROB_6379
ESALQ_10022	MROB_6380
ESALQ_10023	MROB_6381
ESALQ_10024	MROB_6382
ESALQ_10025	MROB_6383
ESALQ_10027	MROB_6384
ESALQ_10028	MROB_6385
ESALQ_10029	MROB_6386
ESALQ_1003	MROB_1786
ESALQ_10030	MROB_6387
ESALQ_10031	MROB_6388
ESALQ_10033	MROB_6390
ESALQ_10034	MROB_6391
ESALQ_10035	MROB_6392
ESALQ_10036	MROB_6393
ESALQ_10037	MROB_6394
ESALQ_10039	MROB_7691
ESALQ_1004	MROB_1787
ESALQ_10040	MROB_36
ESALQ_10041	MROB_7692
ESALQ_10042	MROB_7693
ESALQ_10043	MROB_3176
ESALQ_10044	MROB_3177
ESALQ_10045	MROB_3183
ESALQ_10046	MROB_3182
ESALQ_10047	MROB_3181
ESALQ_10048	MROB_3180
ESALQ_10049	MROB_3185
ESALQ_1005	MROB_1788
ESALQ_10050	MROB_3186
ESALQ_10051	MROB_3187
ESALQ_10052	MROB_3188
ESALQ_10053	MROB_3189
ESALQ_10054	MROB_3190
ESALQ_10055	MROB_3191
ESALQ_10056	MROB_3192
ESALQ_10057	MROB_3193
ESALQ_10058	MROB_3194
ESALQ_10059	MROB_3195
ESALQ_1006	MROB_1789
ESALQ_10060	MROB_3196
ESALQ_10061	MROB_3197
ESALQ_10063	MROB_3198
ESALQ_10064	MROB_3199
ESALQ_10065	MROB_3200
ESALQ_10066	MROB_3201
ESALQ_10067	MROB_3202
ESALQ_10068	MROB_3203
ESALQ_10069	MROB_3205
ESALQ_1007	MROB_1790
ESALQ_10070	MROB_3206
ESALQ_10071	MROB_3207
ESALQ_10072	MROB_3208
ESALQ_10074	MROB_3210
ESALQ_10075	MROB_3212
ESALQ_10076	MROB_3213
ESALQ_10077	MROB_3214
ESALQ_10078	MROB_3215
ESALQ_10079	MROB_3216
ESALQ_1008	MROB_1791
ESALQ_10080	MROB_3217
ESALQ_10081	MROB_9740
ESALQ_10082	MROB_9739
ESALQ_10083	MROB_9738
ESALQ_10084	MROB_9737
ESALQ_10085	MROB_9736
ESALQ_10086	MROB_9735
ESALQ_10087	MROB_9734
ESALQ_10089	MROB_9733
ESALQ_1009	MROB_1792
ESALQ_10090	MROB_9732
ESALQ_10091	MROB_9731
ESALQ_10092	MROB_9730
ESALQ_10093	MROB_9729
ESALQ_10094	MROB_9728
ESALQ_10095	MROB_9727
ESALQ_10096	MROB_9726
ESALQ_10097	MROB_9725
ESALQ_10098	MROB_9724
ESALQ_10099	MROB_9723
ESALQ_101	MROB_4020
ESALQ_1010	MROB_1793
ESALQ_10100	MROB_9722
ESALQ_10101	MROB_9721
ESALQ_10102	MROB_9720
ESALQ_10103	MROB_9719
ESALQ_10104	MROB_9718
ESALQ_10105	MROB_9717
ESALQ_10106	MROB_9716
ESALQ_10107	MROB_9715
ESALQ_10108	MROB_9714
ESALQ_10109	MROB_9713
ESALQ_1011	MROB_1794
ESALQ_10110	MROB_9712
ESALQ_10111	MROB_9711
ESALQ_10112	MROB_9710
ESALQ_10113	MROB_9709
ESALQ_10114	MROB_9708
ESALQ_10115	MROB_9707
ESALQ_10116	MROB_9706
ESALQ_10117	MROB_9704
ESALQ_10118	MROB_9703
ESALQ_10119	MROB_9702
ESALQ_1012	MROB_1795
ESALQ_10120	MROB_9701
ESALQ_10121	MROB_9700
ESALQ_10122	MROB_10661
ESALQ_10123	MROB_10662
ESALQ_10124	MROB_10663
ESALQ_10126	MROB_10664
ESALQ_10127	MROB_10665
ESALQ_10128	MROB_10666
ESALQ_10129	MROB_10667
ESALQ_1013	MROB_1796
ESALQ_10130	MROB_10668
ESALQ_10131	MROB_10669
ESALQ_10132	MROB_10670
ESALQ_10133	MROB_10671
ESALQ_10134	MROB_7473
ESALQ_10135	MROB_7474
ESALQ_10136	MROB_7475
ESALQ_10138	MROB_10147
ESALQ_10139	MROB_10146
ESALQ_1014	MROB_1797
ESALQ_10140	MROB_10144
ESALQ_10141	MROB_10142
ESALQ_10142	MROB_10141
ESALQ_10144	MROB_10140
ESALQ_10145	MROB_10139
ESALQ_10146	MROB_10138
ESALQ_10148	MROB_10136
ESALQ_1015	MROB_1798
ESALQ_10150	MROB_10135
ESALQ_10151	MROB_3863
ESALQ_10152	MROB_3862
ESALQ_10153	MROB_3861
ESALQ_10154	MROB_3860
ESALQ_10157	MROB_10741
ESALQ_10158	MROB_10739
ESALQ_1016	MROB_1799
ESALQ_10160	MROB_10738
ESALQ_10161	MROB_10737
ESALQ_10162	MROB_10736
ESALQ_10163	MROB_10735
ESALQ_10164	MROB_10734
ESALQ_10167	MROB_10733
ESALQ_10168	MROB_10731
ESALQ_10169	MROB_10730
ESALQ_1017	MROB_1800
ESALQ_10170	MROB_10729
ESALQ_10171	MROB_10728
ESALQ_10173	MROB_10727
ESALQ_10175	MROB_10721
ESALQ_10176	MROB_10720
ESALQ_10177	MROB_10719
ESALQ_10179	MROB_4994
ESALQ_1018	MROB_1801
ESALQ_10180	MROB_4992
ESALQ_10181	MROB_4991
ESALQ_10182	MROB_4989
ESALQ_10183	MROB_4988
ESALQ_10184	MROB_4987
ESALQ_10185	MROB_4986
ESALQ_10186	MROB_4985
ESALQ_10187	MROB_4984
ESALQ_10188	MROB_4983
ESALQ_10189	MROB_4982
ESALQ_1019	MROB_1802
ESALQ_10190	MROB_4981
ESALQ_10191	MROB_4980
ESALQ_10192	MROB_4979
ESALQ_10193	MROB_4978
ESALQ_10194	MROB_4977
ESALQ_10195	MROB_4976
ESALQ_10196	MROB_4975
ESALQ_10197	MROB_4974
ESALQ_10198	MROB_4973
ESALQ_10199	MROB_4972
ESALQ_102	MROB_4021
ESALQ_1020	MROB_1803
ESALQ_10200	MROB_4971
ESALQ_10201	MROB_4970
ESALQ_10202	MROB_4969
ESALQ_10203	MROB_4967
ESALQ_10204	MROB_4966
ESALQ_10205	MROB_4965
ESALQ_10206	MROB_4964
ESALQ_10207	MROB_4963
ESALQ_10208	MROB_4962
ESALQ_10209	MROB_4960
ESALQ_1021	MROB_1804
ESALQ_10211	MROB_4958
ESALQ_10212	MROB_4957
ESALQ_10213	MROB_4956
ESALQ_10214	MROB_4955
ESALQ_10215	MROB_4954
ESALQ_10216	MROB_4953
ESALQ_10217	MROB_4952
ESALQ_10218	MROB_4951
ESALQ_10219	MROB_6432
ESALQ_1022	MROB_1805
ESALQ_10221	MROB_6431
ESALQ_10222	MROB_6430
ESALQ_10223	MROB_6429
ESALQ_10224	MROB_6428
ESALQ_10225	MROB_6427
ESALQ_10226	MROB_6426
ESALQ_10227	MROB_6425
ESALQ_10228	MROB_6424
ESALQ_10229	MROB_6423
ESALQ_1023	MROB_1806
ESALQ_10230	MROB_6422
ESALQ_10231	MROB_6421
ESALQ_10232	MROB_6419
ESALQ_10233	MROB_6418
ESALQ_10234	MROB_6417
ESALQ_10235	MROB_6416
ESALQ_10236	MROB_6415
ESALQ_10237	MROB_6414
ESALQ_10239	MROB_6412
ESALQ_1024	MROB_1807
ESALQ_10240	MROB_6410
ESALQ_10241	MROB_6409
ESALQ_10242	MROB_6408
ESALQ_10243	MROB_6406
ESALQ_10244	MROB_6405
ESALQ_10245	MROB_6404
ESALQ_10246	MROB_6403
ESALQ_10247	MROB_6402
ESALQ_10248	MROB_6401
ESALQ_10249	MROB_6400
ESALQ_1025	MROB_1808
ESALQ_10251	MROB_6398
ESALQ_10252	MROB_10124
ESALQ_10253	MROB_10125
ESALQ_10254	MROB_10126
ESALQ_10255	MROB_10127
ESALQ_10256	MROB_6395
ESALQ_10257	MROB_6233
ESALQ_10258	MROB_6234
ESALQ_10259	MROB_6235
ESALQ_1026	MROB_1809
ESALQ_10260	MROB_6236
ESALQ_10261	MROB_6237
ESALQ_10262	MROB_6238
ESALQ_10263	MROB_6239
ESALQ_10264	MROB_6240
ESALQ_10265	MROB_6241
ESALQ_10266	MROB_6242
ESALQ_10267	MROB_6243
ESALQ_10268	MROB_6244
ESALQ_10269	MROB_6245
ESALQ_1027	MROB_1810
ESALQ_10270	MROB_6246
ESALQ_10271	MROB_6247
ESALQ_10272	MROB_6248
ESALQ_10273	MROB_6249
ESALQ_10274	MROB_6250
ESALQ_10275	MROB_6251
ESALQ_10276	MROB_6252
ESALQ_10277	MROB_6253
ESALQ_10278	MROB_6254
ESALQ_10279	MROB_6255
ESALQ_1028	MROB_1811
ESALQ_10281	MROB_6289
ESALQ_10282	MROB_6290
ESALQ_10283	MROB_6291
ESALQ_10284	MROB_6292
ESALQ_10286	MROB_6293
ESALQ_10288	MROB_6295
ESALQ_1029	MROB_1812
ESALQ_10290	MROB_6296
ESALQ_10291	MROB_6297
ESALQ_10292	MROB_6298
ESALQ_10293	MROB_6299
ESALQ_10294	MROB_6300
ESALQ_10295	MROB_6301
ESALQ_10297	MROB_6302
ESALQ_10298	MROB_6303
ESALQ_10299	MROB_6304
ESALQ_103	MROB_4022
ESALQ_1030	MROB_1813
ESALQ_10300	MROB_6305
ESALQ_10301	MROB_6307
ESALQ_10302	MROB_6308
ESALQ_10306	MROB_9742
ESALQ_10307	MROB_9743
ESALQ_10309	MROB_9744
ESALQ_1031	MROB_1814
ESALQ_10310	MROB_9745
ESALQ_10311	MROB_9746
ESALQ_10313	MROB_9748
ESALQ_10314	MROB_9749
ESALQ_10315	MROB_9750
ESALQ_10316	MROB_9751
ESALQ_10317	MROB_9752
ESALQ_10318	MROB_9753
ESALQ_10319	MROB_9754
ESALQ_1032	MROB_1815
ESALQ_10320	MROB_9755
ESALQ_10322	MROB_9756
ESALQ_10323	MROB_9757
ESALQ_10324	MROB_9758
ESALQ_10325	MROB_9759
ESALQ_10326	MROB_9760
ESALQ_10327	MROB_9761
ESALQ_10328	MROB_9762
ESALQ_10329	MROB_9763
ESALQ_1033	MROB_1816
ESALQ_10331	MROB_9764
ESALQ_10332	MROB_10640
ESALQ_10334	MROB_10639
ESALQ_10335	MROB_10638
ESALQ_10336	MROB_10637
ESALQ_10337	MROB_4950
ESALQ_10338	MROB_4949
ESALQ_10339	MROB_4948
ESALQ_1034	MROB_1817
ESALQ_10340	MROB_4947
ESALQ_10341	MROB_4946
ESALQ_10342	MROB_4945
ESALQ_10343	MROB_4944
ESALQ_10344	MROB_4943
ESALQ_10345	MROB_4942
ESALQ_10346	MROB_4941
ESALQ_10347	MROB_4940
ESALQ_10348	MROB_4939
ESALQ_10349	MROB_4938
ESALQ_1035	MROB_1818
ESALQ_10356	MROB_4937
ESALQ_10357	MROB_4936
ESALQ_10358	MROB_4935
ESALQ_10359	MROB_4934
ESALQ_1036	MROB_1819
ESALQ_10360	MROB_4933
ESALQ_10361	MROB_4932
ESALQ_10362	MROB_4930
ESALQ_10364	MROB_4929
ESALQ_10366	MROB_4928
ESALQ_10367	MROB_4927
ESALQ_10368	MROB_4926
ESALQ_10369	MROB_4925
ESALQ_1037	MROB_1820
ESALQ_10370	MROB_4924
ESALQ_10371	MROB_4922
ESALQ_10372	MROB_4921
ESALQ_10375	MROB_4804
ESALQ_10376	MROB_4802
ESALQ_10377	MROB_4801
ESALQ_10378	MROB_4800
ESALQ_10379	MROB_4799
ESALQ_10380	MROB_4797
ESALQ_10381	MROB_4796
ESALQ_10382	MROB_4795
ESALQ_10383	MROB_4794
ESALQ_10384	MROB_4793
ESALQ_10385	MROB_4792
ESALQ_10386	MROB_4791
ESALQ_10387	MROB_4790
ESALQ_10388	MROB_4789
ESALQ_10389	MROB_4788
ESALQ_1039	MROB_1821
ESALQ_10390	MROB_4787
ESALQ_10391	MROB_4786
ESALQ_10392	MROB_4785
ESALQ_10393	MROB_4784
ESALQ_10394	MROB_4782
ESALQ_10395	MROB_4781
ESALQ_10396	MROB_4780
ESALQ_10397	MROB_4778
ESALQ_10398	MROB_4777
ESALQ_10399	MROB_4776
ESALQ_104	MROB_4023
ESALQ_1040	MROB_1822
ESALQ_10400	MROB_4775
ESALQ_10402	MROB_4774
ESALQ_10403	MROB_7086
ESALQ_10404	MROB_7085
ESALQ_10405	MROB_7084
ESALQ_10406	MROB_7083
ESALQ_10407	MROB_7082
ESALQ_10408	MROB_7081
ESALQ_10409	MROB_7080
ESALQ_10410	MROB_7079
ESALQ_10411	MROB_7078
ESALQ_10412	MROB_7077
ESALQ_10413	MROB_7075
ESALQ_10414	MROB_7074
ESALQ_10415	MROB_7073
ESALQ_10416	MROB_7072
ESALQ_10417	MROB_7071
ESALQ_10418	MROB_7070
ESALQ_10419	MROB_7069
ESALQ_1042	MROB_1823
ESALQ_10420	MROB_7068
ESALQ_10421	MROB_7067
ESALQ_10422	MROB_7066
ESALQ_10423	MROB_7065
ESALQ_10424	MROB_7064
ESALQ_10425	MROB_7063
ESALQ_10426	MROB_7062
ESALQ_10427	MROB_7061
ESALQ_10428	MROB_7060
ESALQ_10429	MROB_6087
ESALQ_1043	MROB_1824
ESALQ_10430	MROB_8756
ESALQ_10431	MROB_8755
ESALQ_10432	MROB_8754
ESALQ_10433	MROB_8753
ESALQ_10434	MROB_8752
ESALQ_10435	MROB_8751
ESALQ_10436	MROB_8750
ESALQ_10438	MROB_10547
ESALQ_10439	MROB_10546
ESALQ_1044	MROB_1825
ESALQ_10440	MROB_10544
ESALQ_10441	MROB_10543
ESALQ_10442	MROB_10542
ESALQ_10443	MROB_10541
ESALQ_10444	MROB_10540
ESALQ_10445	MROB_10539
ESALQ_10446	MROB_10538
ESALQ_10448	MROB_10044
ESALQ_10449	MROB_10045
ESALQ_1045	MROB_1826
ESALQ_10450	MROB_10046
ESALQ_10452	MROB_10047
ESALQ_10453	MROB_10049
ESALQ_10454	MROB_10050
ESALQ_10455	MROB_10051
ESALQ_10456	MROB_10052
ESALQ_10457	MROB_10053
ESALQ_10458	MROB_10054
ESALQ_10459	MROB_10055
ESALQ_1046	MROB_1827
ESALQ_10460	MROB_10056
ESALQ_10461	MROB_10057
ESALQ_10462	MROB_10058
ESALQ_10464	MROB_10059
ESALQ_10465	MROB_10060
ESALQ_10466	MROB_10061
ESALQ_10467	MROB_10062
ESALQ_10468	MROB_10063
ESALQ_10469	MROB_10064
ESALQ_1047	MROB_1828
ESALQ_10470	MROB_10066
ESALQ_10471	MROB_10067
ESALQ_10477	MROB_8133
ESALQ_1048	MROB_1829
ESALQ_10481	MROB_10977
ESALQ_10482	MROB_10978
ESALQ_10483	MROB_10979
ESALQ_10484	MROB_10980
ESALQ_10485	MROB_10982
ESALQ_10486	MROB_10983
ESALQ_10487	MROB_10984
ESALQ_10488	MROB_10985
ESALQ_10489	MROB_10986
ESALQ_1049	MROB_1830
ESALQ_10490	MROB_10987
ESALQ_10491	MROB_10988
ESALQ_10492	MROB_10756
ESALQ_10493	MROB_10757
ESALQ_10494	MROB_10758
ESALQ_10495	MROB_10759
ESALQ_10496	MROB_10760
ESALQ_10497	MROB_10761
ESALQ_10498	MROB_10762
ESALQ_10499	MROB_10763
ESALQ_105	MROB_4024
ESALQ_1050	MROB_1831
ESALQ_10500	MROB_10764
ESALQ_10501	MROB_10765
ESALQ_10502	MROB_10766
ESALQ_10503	MROB_10767
ESALQ_10504	MROB_10768
ESALQ_10505	MROB_10769
ESALQ_10506	MROB_6329
ESALQ_10507	MROB_6328
ESALQ_10508	MROB_6327
ESALQ_10509	MROB_6324
ESALQ_1051	MROB_1832
ESALQ_10510	MROB_6323
ESALQ_10511	MROB_6322
ESALQ_10512	MROB_6321
ESALQ_10513	MROB_6320
ESALQ_10514	MROB_6319
ESALQ_10515	MROB_6318
ESALQ_10516	MROB_6317
ESALQ_10517	MROB_6316
ESALQ_10518	MROB_6315
ESALQ_10519	MROB_6314
ESALQ_10520	MROB_6313
ESALQ_10521	MROB_6312
ESALQ_10522	MROB_6311
ESALQ_10523	MROB_6310
ESALQ_10524	MROB_6309
ESALQ_10525	MROB_4773
ESALQ_10526	MROB_4772
ESALQ_10527	MROB_4771
ESALQ_10528	MROB_4770
ESALQ_10529	MROB_4769
ESALQ_1053	MROB_9151
ESALQ_10530	MROB_4768
ESALQ_10531	MROB_4767
ESALQ_10532	MROB_4766
ESALQ_10533	MROB_4765
ESALQ_10534	MROB_4764
ESALQ_10535	MROB_4763
ESALQ_10538	MROB_4761
ESALQ_10539	MROB_4760
ESALQ_1054	MROB_11086
ESALQ_10540	MROB_4759
ESALQ_10541	MROB_9359
ESALQ_10542	MROB_9358
ESALQ_10543	MROB_9357
ESALQ_10544	MROB_9356
ESALQ_10545	MROB_9355
ESALQ_10546	MROB_9354
ESALQ_10547	MROB_9353
ESALQ_10548	MROB_9349
ESALQ_10549	MROB_9348
ESALQ_1055	MROB_11087
ESALQ_10550	MROB_9347
ESALQ_10551	MROB_9346
ESALQ_10552	MROB_9345
ESALQ_10553	MROB_9344
ESALQ_10556	MROB_3226
ESALQ_10557	MROB_3225
ESALQ_10558	MROB_3224
ESALQ_10559	MROB_3223
ESALQ_1056	MROB_11088
ESALQ_10560	MROB_3222
ESALQ_10561	MROB_3221
ESALQ_10562	MROB_3220
ESALQ_10563	MROB_3219
ESALQ_10564	MROB_3218
ESALQ_10569	MROB_10673
ESALQ_1057	MROB_1834
ESALQ_10570	MROB_10674
ESALQ_10571	MROB_10675
ESALQ_10572	MROB_10676
ESALQ_10573	MROB_10678
ESALQ_10574	MROB_10679
ESALQ_10575	MROB_10680
ESALQ_10576	MROB_10681
ESALQ_10577	MROB_10159
ESALQ_10578	MROB_10160
ESALQ_10579	MROB_10161
ESALQ_1058	MROB_10807
ESALQ_10580	MROB_8114
ESALQ_10581	MROB_8113
ESALQ_10582	MROB_8112
ESALQ_10583	MROB_5182
ESALQ_10584	MROB_5181
ESALQ_10585	MROB_5180
ESALQ_10586	MROB_5179
ESALQ_10587	MROB_5178
ESALQ_10588	MROB_5177
ESALQ_10589	MROB_5176
ESALQ_1059	MROB_10806
ESALQ_10590	MROB_5175
ESALQ_10591	MROB_5174
ESALQ_10592	MROB_5173
ESALQ_10593	MROB_5172
ESALQ_10595	MROB_5171
ESALQ_106	MROB_4025
ESALQ_10602	MROB_9539
ESALQ_10608	MROB_4806
ESALQ_10609	MROB_4807
ESALQ_1061	MROB_10805
ESALQ_10610	MROB_4808
ESALQ_10611	MROB_4809
ESALQ_10612	MROB_4810
ESALQ_10613	MROB_4811
ESALQ_10617	MROB_6101
ESALQ_10618	MROB_7379
ESALQ_10619	MROB_7378
ESALQ_1062	MROB_10804
ESALQ_10620	MROB_7377
ESALQ_10621	MROB_7371
ESALQ_10622	MROB_7372
ESALQ_10623	MROB_7375
ESALQ_1064	MROB_10803
ESALQ_1065	MROB_10802
ESALQ_1066	MROB_10801
ESALQ_1067	MROB_10800
ESALQ_1069	MROB_10798
ESALQ_107	MROB_4026
ESALQ_1070	MROB_10797
ESALQ_1071	MROB_10796
ESALQ_1072	MROB_10795
ESALQ_1073	MROB_10794
ESALQ_1074	MROB_10793
ESALQ_1075	MROB_10792
ESALQ_1076	MROB_10791
ESALQ_1077	MROB_10839
ESALQ_1078	MROB_10840
ESALQ_1079	MROB_10842
ESALQ_108	MROB_4028
ESALQ_1080	MROB_10841
ESALQ_1082	MROB_10843
ESALQ_1083	MROB_10844
ESALQ_1084	MROB_10845
ESALQ_1085	MROB_10846
ESALQ_1086	MROB_10847
ESALQ_1087	MROB_10848
ESALQ_1088	MROB_10849
ESALQ_1089	MROB_10850
ESALQ_109	MROB_4029
ESALQ_1090	MROB_10851
ESALQ_1091	MROB_10852
ESALQ_1092	MROB_10854
ESALQ_1094	MROB_3724
ESALQ_1095	MROB_3723
ESALQ_1096	MROB_3722
ESALQ_1098	MROB_3720
ESALQ_1099	MROB_3719
ESALQ_11	MROB_3933
ESALQ_110	MROB_4030
ESALQ_1100	MROB_3718
ESALQ_1101	MROB_3717
ESALQ_1102	MROB_3716
ESALQ_1103	MROB_3715
ESALQ_1104	MROB_3714
ESALQ_1106	MROB_3713
ESALQ_1107	MROB_3712
ESALQ_1108	MROB_3711
ESALQ_1109	MROB_3710
ESALQ_111	MROB_4031
ESALQ_1110	MROB_3709
ESALQ_1111	MROB_3708
ESALQ_1112	MROB_3707
ESALQ_1113	MROB_3706
ESALQ_1114	MROB_3705
ESALQ_1115	MROB_3704
ESALQ_1116	MROB_3703
ESALQ_1117	MROB_6278
ESALQ_1118	MROB_3701
ESALQ_1119	MROB_3700
ESALQ_112	MROB_4032
ESALQ_1120	MROB_3699
ESALQ_1121	MROB_3698
ESALQ_1124	MROB_3697
ESALQ_1125	MROB_3696
ESALQ_1126	MROB_3695
ESALQ_1127	MROB_3694
ESALQ_1128	MROB_3693
ESALQ_1129	MROB_3692
ESALQ_113	MROB_4033
ESALQ_1130	MROB_3691
ESALQ_1131	MROB_3690
ESALQ_1132	MROB_3689
ESALQ_1133	MROB_3688
ESALQ_1134	MROB_3687
ESALQ_1135	MROB_3686
ESALQ_1136	MROB_3685
ESALQ_1137	MROB_3684
ESALQ_1138	MROB_3683
ESALQ_1139	MROB_3682
ESALQ_114	MROB_4034
ESALQ_1142	MROB_3678
ESALQ_1143	MROB_3677
ESALQ_1144	MROB_3676
ESALQ_1145	MROB_3675
ESALQ_1146	MROB_3674
ESALQ_1147	MROB_3673
ESALQ_1148	MROB_3672
ESALQ_1149	MROB_3671
ESALQ_115	MROB_4035
ESALQ_1150	MROB_3670
ESALQ_1151	MROB_3669
ESALQ_1152	MROB_3668
ESALQ_1153	MROB_3667
ESALQ_1154	MROB_3666
ESALQ_1155	MROB_3665
ESALQ_1156	MROB_3664
ESALQ_1157	MROB_3663
ESALQ_1158	MROB_3662
ESALQ_1159	MROB_3661
ESALQ_1160	MROB_3659
ESALQ_1161	MROB_3658
ESALQ_1162	MROB_3657
ESALQ_1163	MROB_3656
ESALQ_1164	MROB_3655
ESALQ_1165	MROB_3654
ESALQ_1166	MROB_3653
ESALQ_1167	MROB_3652
ESALQ_1168	MROB_3651
ESALQ_1169	MROB_3650
ESALQ_117	MROB_4036
ESALQ_1170	MROB_3649
ESALQ_1171	MROB_3648
ESALQ_1172	MROB_3647
ESALQ_1173	MROB_3646
ESALQ_1174	MROB_3645
ESALQ_1175	MROB_3644
ESALQ_1176	MROB_3643
ESALQ_1177	MROB_3642
ESALQ_1178	MROB_3639
ESALQ_118	MROB_4037
ESALQ_1180	MROB_3638
ESALQ_1181	MROB_3637
ESALQ_1182	MROB_3636
ESALQ_1185	MROB_3634
ESALQ_1186	MROB_3633
ESALQ_1187	MROB_3632
ESALQ_1188	MROB_3631
ESALQ_1189	MROB_3630
ESALQ_119	MROB_4038
ESALQ_1190	MROB_3629
ESALQ_1191	MROB_3628
ESALQ_1192	MROB_3627
ESALQ_1193	MROB_3626
ESALQ_1194	MROB_3625
ESALQ_1195	MROB_3624
ESALQ_1196	MROB_3623
ESALQ_1197	MROB_3622
ESALQ_1198	MROB_3621
ESALQ_1199	MROB_3620
ESALQ_12	MROB_3934
ESALQ_120	MROB_4039
ESALQ_1200	MROB_3619
ESALQ_1201	MROB_3618
ESALQ_1202	MROB_3617
ESALQ_1203	MROB_3616
ESALQ_1204	MROB_3615
ESALQ_1205	MROB_3614
ESALQ_1206	MROB_3613
ESALQ_1207	MROB_3612
ESALQ_1208	MROB_3611
ESALQ_1209	MROB_3610
ESALQ_121	MROB_4040
ESALQ_1210	MROB_3609
ESALQ_1211	MROB_3608
ESALQ_1212	MROB_3607
ESALQ_1213	MROB_3605
ESALQ_1214	MROB_3604
ESALQ_1215	MROB_3603
ESALQ_1216	MROB_3602
ESALQ_1217	MROB_3601
ESALQ_1218	MROB_3600
ESALQ_1219	MROB_3599
ESALQ_122	MROB_4041
ESALQ_1220	MROB_3598
ESALQ_1221	MROB_3597
ESALQ_1222	MROB_3596
ESALQ_1223	MROB_3595
ESALQ_1224	MROB_3594
ESALQ_1225	MROB_3593
ESALQ_1227	MROB_3592
ESALQ_1228	MROB_3591
ESALQ_1229	MROB_3590
ESALQ_123	MROB_4042
ESALQ_1230	MROB_3589
ESALQ_1231	MROB_3588
ESALQ_1232	MROB_3587
ESALQ_1233	MROB_3586
ESALQ_1234	MROB_3585
ESALQ_1235	MROB_3584
ESALQ_1236	MROB_3583
ESALQ_1237	MROB_3582
ESALQ_1238	MROB_3581
ESALQ_1239	MROB_3580
ESALQ_1240	MROB_3579
ESALQ_1241	MROB_3578
ESALQ_1242	MROB_3577
ESALQ_1243	MROB_3576
ESALQ_1244	MROB_3575
ESALQ_1245	MROB_3574
ESALQ_1246	MROB_3573
ESALQ_1247	MROB_3572
ESALQ_1248	MROB_3571
ESALQ_1249	MROB_3570
ESALQ_125	MROB_4045
ESALQ_1250	MROB_3569
ESALQ_1251	MROB_3568
ESALQ_1252	MROB_3567
ESALQ_1254	MROB_3566
ESALQ_1255	MROB_3565
ESALQ_1257	MROB_3563
ESALQ_1258	MROB_3562
ESALQ_1259	MROB_3561
ESALQ_126	MROB_4046
ESALQ_1260	MROB_10872
ESALQ_1261	MROB_10871
ESALQ_1262	MROB_10870
ESALQ_1263	MROB_10869
ESALQ_1264	MROB_3554
ESALQ_1265	MROB_3555
ESALQ_1266	MROB_3556
ESALQ_1267	MROB_3557
ESALQ_1268	MROB_3558
ESALQ_1269	MROB_3559
ESALQ_127	MROB_4047
ESALQ_1270	MROB_10873
ESALQ_1271	MROB_10874
ESALQ_1272	MROB_10875
ESALQ_1273	MROB_10876
ESALQ_1274	MROB_10877
ESALQ_1275	MROB_10878
ESALQ_1276	MROB_10879
ESALQ_1277	MROB_10880
ESALQ_1278	MROB_10881
ESALQ_1279	MROB_10882
ESALQ_128	MROB_4048
ESALQ_1281	MROB_10883
ESALQ_1282	MROB_3553
ESALQ_1283	MROB_3552
ESALQ_1284	MROB_3551
ESALQ_1285	MROB_3550
ESALQ_1286	MROB_3549
ESALQ_1287	MROB_3548
ESALQ_1288	MROB_3547
ESALQ_1289	MROB_3546
ESALQ_129	MROB_4049
ESALQ_1290	MROB_3545
ESALQ_1291	MROB_3544
ESALQ_1292	MROB_3543
ESALQ_1293	MROB_3542
ESALQ_1294	MROB_3541
ESALQ_1295	MROB_3540
ESALQ_1296	MROB_3539
ESALQ_1297	MROB_3538
ESALQ_1298	MROB_3537
ESALQ_1299	MROB_3536
ESALQ_13	MROB_3931
ESALQ_130	MROB_4050
ESALQ_1300	MROB_3535
ESALQ_1301	MROB_3534
ESALQ_1302	MROB_3533
ESALQ_1303	MROB_3532
ESALQ_1304	MROB_3531
ESALQ_1305	MROB_3530
ESALQ_1306	MROB_3529
ESALQ_1307	MROB_3528
ESALQ_1308	MROB_3527
ESALQ_1309	MROB_3526
ESALQ_131	MROB_4051
ESALQ_1310	MROB_3525
ESALQ_1311	MROB_3524
ESALQ_1312	MROB_3523
ESALQ_1313	MROB_3522
ESALQ_1314	MROB_3521
ESALQ_1315	MROB_3519
ESALQ_1316	MROB_3518
ESALQ_1317	MROB_3517
ESALQ_1318	MROB_3516
ESALQ_132	MROB_4052
ESALQ_1320	MROB_3515
ESALQ_1321	MROB_3513
ESALQ_1322	MROB_3512
ESALQ_1323	MROB_3511
ESALQ_1324	MROB_3510
ESALQ_1325	MROB_3509
ESALQ_1326	MROB_3508
ESALQ_1327	MROB_3507
ESALQ_1328	MROB_3506
ESALQ_1329	MROB_3505
ESALQ_133	MROB_4053
ESALQ_1330	MROB_3504
ESALQ_1331	MROB_3503
ESALQ_1332	MROB_3502
ESALQ_1333	MROB_3501
ESALQ_1334	MROB_3500
ESALQ_1335	MROB_3498
ESALQ_1336	MROB_3497
ESALQ_1337	MROB_3496
ESALQ_1338	MROB_3495
ESALQ_1339	MROB_3494
ESALQ_134	MROB_4054
ESALQ_1340	MROB_3493
ESALQ_1341	MROB_3491
ESALQ_1342	MROB_3490
ESALQ_1343	MROB_3489
ESALQ_1344	MROB_3488
ESALQ_1345	MROB_3487
ESALQ_1346	MROB_3486
ESALQ_1347	MROB_3485
ESALQ_1348	MROB_3484
ESALQ_1349	MROB_3483
ESALQ_1350	MROB_3482
ESALQ_1351	MROB_3481
ESALQ_1352	MROB_3480
ESALQ_1353	MROB_3479
ESALQ_1354	MROB_3478
ESALQ_1355	MROB_3477
ESALQ_1356	MROB_3476
ESALQ_1357	MROB_3475
ESALQ_1358	MROB_3474
ESALQ_1359	MROB_3473
ESALQ_136	MROB_4055
ESALQ_1360	MROB_3472
ESALQ_1362	MROB_3471
ESALQ_1363	MROB_3470
ESALQ_1365	MROB_3469
ESALQ_1366	MROB_3468
ESALQ_1367	MROB_3467
ESALQ_1368	MROB_3466
ESALQ_1369	MROB_3465
ESALQ_137	MROB_4056
ESALQ_1370	MROB_3464
ESALQ_1371	MROB_3463
ESALQ_1372	MROB_3462
ESALQ_1373	MROB_3461
ESALQ_1374	MROB_3460
ESALQ_1375	MROB_3459
ESALQ_1377	MROB_3457
ESALQ_1378	MROB_3456
ESALQ_1379	MROB_3455
ESALQ_138	MROB_4057
ESALQ_1380	MROB_3454
ESALQ_1381	MROB_3453
ESALQ_1382	MROB_3452
ESALQ_1383	MROB_3451
ESALQ_1384	MROB_3450
ESALQ_1385	MROB_3449
ESALQ_1386	MROB_3448
ESALQ_1387	MROB_3447
ESALQ_1388	MROB_3446
ESALQ_1389	MROB_3445
ESALQ_139	MROB_4058
ESALQ_1390	MROB_3444
ESALQ_1391	MROB_3443
ESALQ_1392	MROB_3442
ESALQ_1393	MROB_3441
ESALQ_1394	MROB_3440
ESALQ_1395	MROB_3439
ESALQ_1396	MROB_3438
ESALQ_1398	MROB_10957
ESALQ_1399	MROB_10956
ESALQ_140	MROB_4059
ESALQ_1400	MROB_10955
ESALQ_1401	MROB_10954
ESALQ_1402	MROB_10953
ESALQ_1403	MROB_10952
ESALQ_1404	MROB_10951
ESALQ_1405	MROB_10950
ESALQ_1406	MROB_10949
ESALQ_1407	MROB_10948
ESALQ_1408	MROB_10947
ESALQ_1409	MROB_10266
ESALQ_141	MROB_4060
ESALQ_1410	MROB_10265
ESALQ_1413	MROB_10264
ESALQ_1414	MROB_10262
ESALQ_1415	MROB_10261
ESALQ_1416	MROB_10260
ESALQ_1417	MROB_9097
ESALQ_1418	MROB_9096
ESALQ_1419	MROB_9095
ESALQ_142	MROB_4061
ESALQ_1420	MROB_9094
ESALQ_1421	MROB_9093
ESALQ_1422	MROB_9092
ESALQ_1423	MROB_9091
ESALQ_1424	MROB_9090
ESALQ_1425	MROB_9089
ESALQ_1426	MROB_9088
ESALQ_1427	MROB_9087
ESALQ_1428	MROB_9086
ESALQ_1429	MROB_9085
ESALQ_143	MROB_4062
ESALQ_1430	MROB_9084
ESALQ_1432	MROB_9083
ESALQ_1433	MROB_9082
ESALQ_1434	MROB_9081
ESALQ_1435	MROB_9080
ESALQ_1436	MROB_9079
ESALQ_1437	MROB_9078
ESALQ_1438	MROB_9077
ESALQ_1439	MROB_9076
ESALQ_144	MROB_4063
ESALQ_1440	MROB_9075
ESALQ_1441	MROB_9074
ESALQ_1442	MROB_9073
ESALQ_1443	MROB_9072
ESALQ_1444	MROB_9071
ESALQ_1445	MROB_9070
ESALQ_1446	MROB_9069
ESALQ_1447	MROB_9068
ESALQ_1448	MROB_9067
ESALQ_1449	MROB_9066
ESALQ_145	MROB_4064
ESALQ_1450	MROB_9065
ESALQ_1451	MROB_9064
ESALQ_1452	MROB_9063
ESALQ_1453	MROB_9062
ESALQ_1454	MROB_9061
ESALQ_1455	MROB_9060
ESALQ_1456	MROB_9059
ESALQ_1457	MROB_9058
ESALQ_1458	MROB_9057
ESALQ_1459	MROB_9056
ESALQ_146	MROB_4065
ESALQ_1460	MROB_9055
ESALQ_1461	MROB_9054
ESALQ_1462	MROB_9053
ESALQ_1463	MROB_9052
ESALQ_1464	MROB_9051
ESALQ_1465	MROB_9050
ESALQ_1466	MROB_9049
ESALQ_1467	MROB_9048
ESALQ_1468	MROB_9046
ESALQ_1469	MROB_9045
ESALQ_147	MROB_4066
ESALQ_1470	MROB_9044
ESALQ_1471	MROB_9043
ESALQ_1472	MROB_9042
ESALQ_1473	MROB_9041
ESALQ_1474	MROB_9039
ESALQ_1476	MROB_9038
ESALQ_1477	MROB_9037
ESALQ_1478	MROB_9036
ESALQ_1479	MROB_9035
ESALQ_148	MROB_4067
ESALQ_1480	MROB_9034
ESALQ_1481	MROB_9033
ESALQ_1483	MROB_9030
ESALQ_1484	MROB_9029
ESALQ_1485	MROB_9028
ESALQ_1486	MROB_9027
ESALQ_1487	MROB_9026
ESALQ_1488	MROB_9025
ESALQ_1489	MROB_9024
ESALQ_149	MROB_4068
ESALQ_1491	MROB_9022
ESALQ_1492	MROB_9021
ESALQ_1493	MROB_9020
ESALQ_1494	MROB_9019
ESALQ_1495	MROB_9018
ESALQ_1496	MROB_9016
ESALQ_1497	MROB_9015
ESALQ_1498	MROB_9014
ESALQ_1499	MROB_9013
ESALQ_15	MROB_3935
ESALQ_150	MROB_4069
ESALQ_1500	MROB_9012
ESALQ_1501	MROB_9011
ESALQ_1502	MROB_9010
ESALQ_1503	MROB_9009
ESALQ_1504	MROB_9008
ESALQ_1505	MROB_9007
ESALQ_1507	MROB_9006
ESALQ_1508	MROB_9004
ESALQ_1509	MROB_9003
ESALQ_151	MROB_4070
ESALQ_1510	MROB_9002
ESALQ_1511	MROB_9001
ESALQ_1512	MROB_9000
ESALQ_1513	MROB_8998
ESALQ_1514	MROB_8997
ESALQ_1515	MROB_8996
ESALQ_1516	MROB_8995
ESALQ_1517	MROB_8993
ESALQ_1518	MROB_8992
ESALQ_1519	MROB_8991
ESALQ_152	MROB_4071
ESALQ_1520	MROB_8990
ESALQ_1521	MROB_8989
ESALQ_1522	MROB_8988
ESALQ_1523	MROB_8987
ESALQ_1524	MROB_8986
ESALQ_1525	MROB_8985
ESALQ_1526	MROB_8984
ESALQ_1527	MROB_8983
ESALQ_1528	MROB_8982
ESALQ_1529	MROB_8981
ESALQ_153	MROB_4072
ESALQ_1530	MROB_8980
ESALQ_1531	MROB_8979
ESALQ_1532	MROB_8978
ESALQ_1533	MROB_8977
ESALQ_1534	MROB_8976
ESALQ_1535	MROB_8975
ESALQ_1536	MROB_8974
ESALQ_1537	MROB_8973
ESALQ_1539	MROB_8972
ESALQ_154	MROB_4073
ESALQ_1540	MROB_8971
ESALQ_1541	MROB_8970
ESALQ_1542	MROB_8969
ESALQ_1543	MROB_8968
ESALQ_1544	MROB_8967
ESALQ_1545	MROB_8966
ESALQ_1546	MROB_8965
ESALQ_1547	MROB_8964
ESALQ_1549	MROB_8963
ESALQ_155	MROB_4074
ESALQ_1550	MROB_8962
ESALQ_1551	MROB_8961
ESALQ_1552	MROB_8960
ESALQ_1553	MROB_8959
ESALQ_1554	MROB_8958
ESALQ_1555	MROB_8957
ESALQ_1556	MROB_8956
ESALQ_1557	MROB_8955
ESALQ_1558	MROB_8954
ESALQ_1559	MROB_8953
ESALQ_156	MROB_4075
ESALQ_1560	MROB_8952
ESALQ_1561	MROB_8951
ESALQ_1562	MROB_8950
ESALQ_1563	MROB_8949
ESALQ_1564	MROB_8948
ESALQ_1565	MROB_8947
ESALQ_1566	MROB_8946
ESALQ_1567	MROB_8945
ESALQ_1568	MROB_8944
ESALQ_1569	MROB_8943
ESALQ_157	MROB_4076
ESALQ_1570	MROB_8942
ESALQ_1571	MROB_8941
ESALQ_1572	MROB_8940
ESALQ_1573	MROB_8939
ESALQ_1574	MROB_8938
ESALQ_1576	MROB_8937
ESALQ_1577	MROB_8935
ESALQ_1578	MROB_8934
ESALQ_1579	MROB_8933
ESALQ_158	MROB_4077
ESALQ_1580	MROB_8932
ESALQ_1581	MROB_8931
ESALQ_1582	MROB_8930
ESALQ_1583	MROB_8929
ESALQ_1584	MROB_8928
ESALQ_1585	MROB_8927
ESALQ_1586	MROB_8926
ESALQ_1587	MROB_8925
ESALQ_1588	MROB_8924
ESALQ_1589	MROB_8923
ESALQ_1590	MROB_8922
ESALQ_1592	MROB_8921
ESALQ_1593	MROB_8920
ESALQ_1594	MROB_8919
ESALQ_1595	MROB_8918
ESALQ_1596	MROB_8917
ESALQ_1597	MROB_8916
ESALQ_1598	MROB_8915
ESALQ_1599	MROB_3173
ESALQ_16	MROB_3936
ESALQ_160	MROB_4078
ESALQ_1600	MROB_3172
ESALQ_1602	MROB_3171
ESALQ_1603	MROB_3170
ESALQ_1604	MROB_3169
ESALQ_1605	MROB_3168
ESALQ_1606	MROB_3167
ESALQ_1607	MROB_3166
ESALQ_1608	MROB_3165
ESALQ_1609	MROB_3164
ESALQ_161	MROB_4079
ESALQ_1610	MROB_3163
ESALQ_1611	MROB_3162
ESALQ_1612	MROB_3161
ESALQ_1613	MROB_3160
ESALQ_1614	MROB_3159
ESALQ_1615	MROB_3158
ESALQ_1617	MROB_3156
ESALQ_1618	MROB_3155
ESALQ_1619	MROB_3154
ESALQ_162	MROB_965
ESALQ_1620	MROB_3153
ESALQ_1621	MROB_3152
ESALQ_1622	MROB_3151
ESALQ_1623	MROB_3150
ESALQ_1625	MROB_3149
ESALQ_1626	MROB_3148
ESALQ_1627	MROB_3147
ESALQ_1628	MROB_3146
ESALQ_1629	MROB_3145
ESALQ_163	MROB_966
ESALQ_1630	MROB_3144
ESALQ_1631	MROB_3143
ESALQ_1632	MROB_3142
ESALQ_1633	MROB_3141
ESALQ_1634	MROB_3140
ESALQ_1635	MROB_3139
ESALQ_1636	MROB_3138
ESALQ_1637	MROB_3137
ESALQ_1638	MROB_3136
ESALQ_1639	MROB_3135
ESALQ_164	MROB_967
ESALQ_1640	MROB_3134
ESALQ_1641	MROB_3133
ESALQ_1642	MROB_3132
ESALQ_1643	MROB_3131
ESALQ_1644	MROB_3130
ESALQ_1645	MROB_3129
ESALQ_1646	MROB_3128
ESALQ_1647	MROB_3127
ESALQ_1648	MROB_3126
ESALQ_1649	MROB_3125
ESALQ_165	MROB_968
ESALQ_1650	MROB_3124
ESALQ_1651	MROB_3122
ESALQ_1653	MROB_3121
ESALQ_1654	MROB_3120
ESALQ_1655	MROB_3119
ESALQ_1656	MROB_3118
ESALQ_1657	MROB_3117
ESALQ_1658	MROB_3116
ESALQ_1659	MROB_3115
ESALQ_166	MROB_969
ESALQ_1660	MROB_3114
ESALQ_1661	MROB_3113
ESALQ_1662	MROB_3112
ESALQ_1663	MROB_3111
ESALQ_1664	MROB_3110
ESALQ_1666	MROB_3109
ESALQ_1667	MROB_3108
ESALQ_1668	MROB_3107
ESALQ_1669	MROB_3106
ESALQ_167	MROB_970
ESALQ_1670	MROB_3105
ESALQ_1671	MROB_3104
ESALQ_1672	MROB_3103
ESALQ_1673	MROB_3102
ESALQ_1674	MROB_3101
ESALQ_1675	MROB_3100
ESALQ_1676	MROB_3099
ESALQ_1677	MROB_3098
ESALQ_1678	MROB_3097
ESALQ_1679	MROB_3096
ESALQ_168	MROB_971
ESALQ_1680	MROB_3095
ESALQ_1681	MROB_3094
ESALQ_1682	MROB_3093
ESALQ_1683	MROB_3092
ESALQ_1684	MROB_3091
ESALQ_1685	MROB_3090
ESALQ_1686	MROB_3089
ESALQ_1687	MROB_3088
ESALQ_1688	MROB_3087
ESALQ_1689	MROB_3086
ESALQ_169	MROB_972
ESALQ_1690	MROB_3085
ESALQ_1691	MROB_3084
ESALQ_1692	MROB_3083
ESALQ_1693	MROB_3082
ESALQ_1694	MROB_3081
ESALQ_1695	MROB_3080
ESALQ_1697	MROB_3079
ESALQ_1698	MROB_3078
ESALQ_1699	MROB_3077
ESALQ_17	MROB_3937
ESALQ_170	MROB_973
ESALQ_1700	MROB_3076
ESALQ_1701	MROB_3075
ESALQ_1702	MROB_3074
ESALQ_1703	MROB_3073
ESALQ_1704	MROB_3072
ESALQ_1705	MROB_3071
ESALQ_1706	MROB_3070
ESALQ_1707	MROB_3069
ESALQ_1708	MROB_3068
ESALQ_1709	MROB_3067
ESALQ_171	MROB_974
ESALQ_1710	MROB_3066
ESALQ_1711	MROB_3065
ESALQ_1712	MROB_3064
ESALQ_1714	MROB_6283
ESALQ_1717	MROB_6279
ESALQ_1718	MROB_3063
ESALQ_1719	MROB_3062
ESALQ_172	MROB_975
ESALQ_1720	MROB_3061
ESALQ_1721	MROB_3060
ESALQ_1722	MROB_3059
ESALQ_1723	MROB_3058
ESALQ_1724	MROB_3057
ESALQ_1725	MROB_3056
ESALQ_1726	MROB_3055
ESALQ_1727	MROB_3053
ESALQ_1728	MROB_3052
ESALQ_1729	MROB_3051
ESALQ_173	MROB_976
ESALQ_1730	MROB_3050
ESALQ_1731	MROB_3049
ESALQ_1732	MROB_3048
ESALQ_1733	MROB_3047
ESALQ_1734	MROB_3046
ESALQ_1735	MROB_3045
ESALQ_1736	MROB_3044
ESALQ_1737	MROB_3043
ESALQ_1738	MROB_3042
ESALQ_1739	MROB_3041
ESALQ_174	MROB_977
ESALQ_1740	MROB_3040
ESALQ_1741	MROB_3039
ESALQ_1742	MROB_3038
ESALQ_1743	MROB_3037
ESALQ_1744	MROB_3036
ESALQ_1745	MROB_3035
ESALQ_1746	MROB_3034
ESALQ_1747	MROB_3033
ESALQ_1748	MROB_3032
ESALQ_175	MROB_978
ESALQ_1750	MROB_3030
ESALQ_1751	MROB_3029
ESALQ_1752	MROB_3028
ESALQ_1753	MROB_3026
ESALQ_1754	MROB_3025
ESALQ_1756	MROB_3022
ESALQ_1757	MROB_3021
ESALQ_1758	MROB_3020
ESALQ_1759	MROB_3019
ESALQ_176	MROB_979
ESALQ_1760	MROB_3018
ESALQ_1761	MROB_3017
ESALQ_1762	MROB_3016
ESALQ_1763	MROB_3015
ESALQ_1764	MROB_3014
ESALQ_1765	MROB_3013
ESALQ_1767	MROB_3012
ESALQ_1768	MROB_3011
ESALQ_1769	MROB_3007
ESALQ_177	MROB_980
ESALQ_1770	MROB_3006
ESALQ_1771	MROB_3005
ESALQ_1772	MROB_3004
ESALQ_1773	MROB_3003
ESALQ_1774	MROB_3002
ESALQ_1775	MROB_3001
ESALQ_1776	MROB_3000
ESALQ_1777	MROB_2999
ESALQ_1778	MROB_2998
ESALQ_1779	MROB_2997
ESALQ_1780	MROB_2996
ESALQ_1781	MROB_2995
ESALQ_1782	MROB_2994
ESALQ_1783	MROB_2993
ESALQ_1784	MROB_2992
ESALQ_1785	MROB_2991
ESALQ_1786	MROB_2990
ESALQ_1787	MROB_2989
ESALQ_179	MROB_981
ESALQ_1790	MROB_2988
ESALQ_1791	MROB_2987
ESALQ_1792	MROB_2986
ESALQ_1793	MROB_2985
ESALQ_1794	MROB_2984
ESALQ_1795	MROB_2983
ESALQ_1796	MROB_2982
ESALQ_1797	MROB_2981
ESALQ_1798	MROB_2980
ESALQ_1799	MROB_2979
ESALQ_18	MROB_3939
ESALQ_180	MROB_982
ESALQ_1800	MROB_2978
ESALQ_1801	MROB_2977
ESALQ_1802	MROB_2976
ESALQ_1803	MROB_2975
ESALQ_1804	MROB_2974
ESALQ_1805	MROB_2973
ESALQ_1806	MROB_2972
ESALQ_1807	MROB_2971
ESALQ_1808	MROB_2970
ESALQ_1809	MROB_2969
ESALQ_181	MROB_983
ESALQ_1810	MROB_2968
ESALQ_1811	MROB_2967
ESALQ_1812	MROB_2966
ESALQ_1813	MROB_2965
ESALQ_1814	MROB_2963
ESALQ_1815	MROB_2961
ESALQ_1816	MROB_2960
ESALQ_1817	MROB_2959
ESALQ_1818	MROB_2958
ESALQ_1819	MROB_2956
ESALQ_182	MROB_984
ESALQ_1820	MROB_2955
ESALQ_1821	MROB_2954
ESALQ_1823	MROB_2953
ESALQ_1824	MROB_2952
ESALQ_1825	MROB_2951
ESALQ_1826	MROB_2950
ESALQ_1827	MROB_2949
ESALQ_1828	MROB_2948
ESALQ_1829	MROB_2947
ESALQ_183	MROB_985
ESALQ_1830	MROB_2946
ESALQ_1831	MROB_2945
ESALQ_1832	MROB_2944
ESALQ_1833	MROB_2943
ESALQ_1834	MROB_2942
ESALQ_1835	MROB_2941
ESALQ_1836	MROB_2940
ESALQ_1837	MROB_2939
ESALQ_1838	MROB_2938
ESALQ_1839	MROB_2937
ESALQ_1840	MROB_2936
ESALQ_1841	MROB_2935
ESALQ_1842	MROB_2934
ESALQ_1843	MROB_2933
ESALQ_1844	MROB_2932
ESALQ_1845	MROB_2931
ESALQ_1846	MROB_2930
ESALQ_1847	MROB_2929
ESALQ_1848	MROB_2928
ESALQ_1849	MROB_2927
ESALQ_185	MROB_986
ESALQ_1850	MROB_2926
ESALQ_1851	MROB_2925
ESALQ_1852	MROB_2924
ESALQ_1853	MROB_2923
ESALQ_1854	MROB_2921
ESALQ_1855	MROB_2920
ESALQ_1856	MROB_2919
ESALQ_1857	MROB_2918
ESALQ_1858	MROB_2917
ESALQ_1859	MROB_2916
ESALQ_186	MROB_987
ESALQ_1860	MROB_2915
ESALQ_1861	MROB_2914
ESALQ_1862	MROB_2913
ESALQ_1863	MROB_2912
ESALQ_1864	MROB_2911
ESALQ_1865	MROB_2910
ESALQ_1866	MROB_2909
ESALQ_1867	MROB_2908
ESALQ_1869	MROB_2907
ESALQ_187	MROB_989
ESALQ_1870	MROB_2906
ESALQ_1871	MROB_2905
ESALQ_1872	MROB_2904
ESALQ_1873	MROB_2903
ESALQ_1875	MROB_2902
ESALQ_1876	MROB_2901
ESALQ_1877	MROB_2900
ESALQ_1878	MROB_2899
ESALQ_1879	MROB_2897
ESALQ_188	MROB_990
ESALQ_1880	MROB_2896
ESALQ_1881	MROB_2895
ESALQ_1882	MROB_2894
ESALQ_1883	MROB_2893
ESALQ_1884	MROB_2892
ESALQ_1885	MROB_2891
ESALQ_1886	MROB_2890
ESALQ_1887	MROB_2889
ESALQ_1888	MROB_2888
ESALQ_1889	MROB_2887
ESALQ_189	MROB_991
ESALQ_1890	MROB_2886
ESALQ_1891	MROB_2885
ESALQ_1892	MROB_2884
ESALQ_1893	MROB_2883
ESALQ_1894	MROB_2882
ESALQ_1895	MROB_2880
ESALQ_1896	MROB_2879
ESALQ_1897	MROB_2878
ESALQ_1898	MROB_2877
ESALQ_1899	MROB_2876
ESALQ_19	MROB_3940
ESALQ_190	MROB_993
ESALQ_1900	MROB_2875
ESALQ_1901	MROB_2874
ESALQ_1902	MROB_2873
ESALQ_1903	MROB_2872
ESALQ_1904	MROB_2871
ESALQ_1905	MROB_2870
ESALQ_1906	MROB_2869
ESALQ_1907	MROB_2868
ESALQ_1908	MROB_2867
ESALQ_1909	MROB_2866
ESALQ_191	MROB_994
ESALQ_1910	MROB_2865
ESALQ_1911	MROB_2864
ESALQ_1912	MROB_2863
ESALQ_1913	MROB_2862
ESALQ_1914	MROB_2861
ESALQ_1915	MROB_2860
ESALQ_1916	MROB_2859
ESALQ_1917	MROB_2858
ESALQ_1918	MROB_2857
ESALQ_1919	MROB_2856
ESALQ_192	MROB_995
ESALQ_1920	MROB_2855
ESALQ_1921	MROB_2854
ESALQ_1922	MROB_2853
ESALQ_1923	MROB_2852
ESALQ_1924	MROB_2851
ESALQ_1925	MROB_2850
ESALQ_1926	MROB_2849
ESALQ_1927	MROB_2848
ESALQ_1928	MROB_2847
ESALQ_1929	MROB_2846
ESALQ_1930	MROB_2845
ESALQ_1931	MROB_2844
ESALQ_1932	MROB_2843
ESALQ_1933	MROB_2842
ESALQ_1934	MROB_2841
ESALQ_1935	MROB_2840
ESALQ_1936	MROB_2839
ESALQ_1937	MROB_2838
ESALQ_1938	MROB_2837
ESALQ_194	MROB_996
ESALQ_1940	MROB_2836
ESALQ_1941	MROB_2835
ESALQ_1942	MROB_2834
ESALQ_1943	MROB_2833
ESALQ_1944	MROB_2832
ESALQ_1945	MROB_2831
ESALQ_1946	MROB_2830
ESALQ_1947	MROB_2829
ESALQ_1948	MROB_2828
ESALQ_1949	MROB_2827
ESALQ_195	MROB_997
ESALQ_1950	MROB_2826
ESALQ_1951	MROB_2825
ESALQ_1952	MROB_2824
ESALQ_1953	MROB_2823
ESALQ_1954	MROB_2822
ESALQ_1955	MROB_2820
ESALQ_1956	MROB_2819
ESALQ_1957	MROB_2818
ESALQ_1958	MROB_2817
ESALQ_1959	MROB_2816
ESALQ_196	MROB_999
ESALQ_1960	MROB_2815
ESALQ_1961	MROB_2814
ESALQ_1962	MROB_2813
ESALQ_1963	MROB_2812
ESALQ_1964	MROB_2811
ESALQ_1965	MROB_2810
ESALQ_1966	MROB_2809
ESALQ_1967	MROB_2808
ESALQ_1968	MROB_2807
ESALQ_1969	MROB_2806
ESALQ_197	MROB_1000
ESALQ_1970	MROB_2805
ESALQ_1971	MROB_2804
ESALQ_1972	MROB_2803
ESALQ_1973	MROB_2802
ESALQ_1974	MROB_2801
ESALQ_1975	MROB_2800
ESALQ_1976	MROB_2799
ESALQ_1977	MROB_2798
ESALQ_1978	MROB_2797
ESALQ_1979	MROB_2796
ESALQ_198	MROB_1001
ESALQ_1980	MROB_2795
ESALQ_1981	MROB_2794
ESALQ_1982	MROB_2793
ESALQ_1983	MROB_2792
ESALQ_1984	MROB_2791
ESALQ_1985	MROB_2790
ESALQ_1986	MROB_2789
ESALQ_1987	MROB_2788
ESALQ_1988	MROB_2787
ESALQ_1989	MROB_2786
ESALQ_199	MROB_1002
ESALQ_1990	MROB_2785
ESALQ_1991	MROB_2784
ESALQ_1992	MROB_2783
ESALQ_1993	MROB_2782
ESALQ_1994	MROB_2781
ESALQ_1995	MROB_2780
ESALQ_1996	MROB_2779
ESALQ_1997	MROB_2778
ESALQ_1999	MROB_2777
ESALQ_2	MROB_11077
ESALQ_20	MROB_3941
ESALQ_200	MROB_1003
ESALQ_2000	MROB_2776
ESALQ_2001	MROB_2775
ESALQ_2002	MROB_2774
ESALQ_2003	MROB_2773
ESALQ_2004	MROB_2772
ESALQ_2005	MROB_2771
ESALQ_2006	MROB_2770
ESALQ_2007	MROB_2769
ESALQ_2008	MROB_2768
ESALQ_2009	MROB_2767
ESALQ_201	MROB_1004
ESALQ_2010	MROB_2766
ESALQ_2011	MROB_2765
ESALQ_2012	MROB_2764
ESALQ_2013	MROB_2763
ESALQ_2014	MROB_2762
ESALQ_2015	MROB_2761
ESALQ_2016	MROB_2760
ESALQ_2017	MROB_2759
ESALQ_2018	MROB_2758
ESALQ_202	MROB_1005
ESALQ_2020	MROB_2757
ESALQ_2021	MROB_2756
ESALQ_2022	MROB_2755
ESALQ_2023	MROB_2753
ESALQ_2024	MROB_2752
ESALQ_2025	MROB_2751
ESALQ_2026	MROB_2750
ESALQ_2027	MROB_2749
ESALQ_2029	MROB_2748
ESALQ_203	MROB_1006
ESALQ_2030	MROB_2747
ESALQ_2031	MROB_2746
ESALQ_2032	MROB_2745
ESALQ_2033	MROB_2744
ESALQ_2034	MROB_2743
ESALQ_2036	MROB_2742
ESALQ_2037	MROB_2740
ESALQ_2038	MROB_2739
ESALQ_2039	MROB_2738
ESALQ_204	MROB_1007
ESALQ_2040	MROB_2737
ESALQ_2041	MROB_2736
ESALQ_2042	MROB_2735
ESALQ_2043	MROB_2734
ESALQ_2044	MROB_2733
ESALQ_2045	MROB_2732
ESALQ_2046	MROB_2731
ESALQ_2047	MROB_2730
ESALQ_2048	MROB_2729
ESALQ_2049	MROB_2728
ESALQ_205	MROB_1008
ESALQ_2050	MROB_2727
ESALQ_2051	MROB_2726
ESALQ_2052	MROB_2725
ESALQ_2053	MROB_2724
ESALQ_2054	MROB_2723
ESALQ_2055	MROB_2722
ESALQ_2056	MROB_2721
ESALQ_2057	MROB_2720
ESALQ_2058	MROB_2719
ESALQ_2059	MROB_2718
ESALQ_206	MROB_1009
ESALQ_2060	MROB_2717
ESALQ_2061	MROB_2716
ESALQ_2062	MROB_2715
ESALQ_2063	MROB_2714
ESALQ_2064	MROB_2713
ESALQ_2065	MROB_2712
ESALQ_2066	MROB_2711
ESALQ_2067	MROB_2710
ESALQ_2068	MROB_2709
ESALQ_2069	MROB_2708
ESALQ_207	MROB_1010
ESALQ_2070	MROB_2707
ESALQ_2071	MROB_2706
ESALQ_2072	MROB_2705
ESALQ_2074	MROB_2704
ESALQ_2075	MROB_2703
ESALQ_2076	MROB_2702
ESALQ_2077	MROB_2701
ESALQ_2078	MROB_2700
ESALQ_2079	MROB_2699
ESALQ_208	MROB_1011
ESALQ_2080	MROB_2698
ESALQ_2081	MROB_2697
ESALQ_2082	MROB_2696
ESALQ_2083	MROB_2695
ESALQ_2084	MROB_2694
ESALQ_2085	MROB_2693
ESALQ_2087	MROB_2692
ESALQ_2088	MROB_2691
ESALQ_2089	MROB_2690
ESALQ_209	MROB_1012
ESALQ_2090	MROB_2689
ESALQ_2092	MROB_2688
ESALQ_2093	MROB_2687
ESALQ_2095	MROB_2686
ESALQ_2097	MROB_2685
ESALQ_2098	MROB_2684
ESALQ_2099	MROB_2683
ESALQ_21	MROB_3942
ESALQ_210	MROB_1013
ESALQ_2100	MROB_2682
ESALQ_2101	MROB_2681
ESALQ_2102	MROB_2680
ESALQ_2103	MROB_2679
ESALQ_2105	MROB_2678
ESALQ_2106	MROB_2677
ESALQ_2107	MROB_2676
ESALQ_2108	MROB_2675
ESALQ_2109	MROB_2673
ESALQ_211	MROB_1014
ESALQ_2110	MROB_2672
ESALQ_2111	MROB_2671
ESALQ_2112	MROB_2670
ESALQ_2113	MROB_2669
ESALQ_2114	MROB_2668
ESALQ_2115	MROB_2667
ESALQ_2116	MROB_2666
ESALQ_2117	MROB_2665
ESALQ_2118	MROB_2664
ESALQ_2119	MROB_2663
ESALQ_212	MROB_1015
ESALQ_2120	MROB_2662
ESALQ_2121	MROB_2661
ESALQ_2122	MROB_2660
ESALQ_2123	MROB_2659
ESALQ_2124	MROB_2658
ESALQ_2125	MROB_2657
ESALQ_2126	MROB_2656
ESALQ_2127	MROB_2655
ESALQ_2128	MROB_2654
ESALQ_2129	MROB_2653
ESALQ_213	MROB_1016
ESALQ_2130	MROB_2652
ESALQ_2131	MROB_2651
ESALQ_2132	MROB_2650
ESALQ_2133	MROB_5244
ESALQ_2135	MROB_5245
ESALQ_2136	MROB_5246
ESALQ_2137	MROB_5247
ESALQ_2138	MROB_5251
ESALQ_2139	MROB_5252
ESALQ_214	MROB_1017
ESALQ_2141	MROB_5253
ESALQ_2143	MROB_5254
ESALQ_2144	MROB_5255
ESALQ_2145	MROB_5256
ESALQ_2146	MROB_5257
ESALQ_2147	MROB_5258
ESALQ_2148	MROB_5259
ESALQ_2149	MROB_5260
ESALQ_215	MROB_1018
ESALQ_2151	MROB_5261
ESALQ_2152	MROB_5262
ESALQ_2153	MROB_5263
ESALQ_2154	MROB_5264
ESALQ_2155	MROB_5265
ESALQ_2156	MROB_5266
ESALQ_2157	MROB_5267
ESALQ_2158	MROB_5268
ESALQ_2159	MROB_5269
ESALQ_216	MROB_1019
ESALQ_2160	MROB_8761
ESALQ_2161	MROB_5271
ESALQ_2162	MROB_5272
ESALQ_2163	MROB_5273
ESALQ_2164	MROB_5274
ESALQ_2165	MROB_5275
ESALQ_2166	MROB_5276
ESALQ_2167	MROB_5277
ESALQ_2168	MROB_5278
ESALQ_217	MROB_1020
ESALQ_2170	MROB_5280
ESALQ_2171	MROB_5281
ESALQ_2172	MROB_5282
ESALQ_2173	MROB_5283
ESALQ_2174	MROB_5284
ESALQ_2176	MROB_5285
ESALQ_2177	MROB_5286
ESALQ_2178	MROB_5287
ESALQ_2179	MROB_5288
ESALQ_218	MROB_1021
ESALQ_2180	MROB_5289
ESALQ_2181	MROB_5290
ESALQ_2182	MROB_5291
ESALQ_2183	MROB_5292
ESALQ_2184	MROB_5293
ESALQ_2185	MROB_5294
ESALQ_2186	MROB_5295
ESALQ_2187	MROB_5296
ESALQ_2188	MROB_5298
ESALQ_219	MROB_1022
ESALQ_2190	MROB_10959
ESALQ_2191	MROB_10960
ESALQ_2192	MROB_10961
ESALQ_2193	MROB_10962
ESALQ_2194	MROB_10963
ESALQ_2195	MROB_10964
ESALQ_2196	MROB_10965
ESALQ_2197	MROB_10966
ESALQ_2198	MROB_10967
ESALQ_2199	MROB_5299
ESALQ_22	MROB_3944
ESALQ_220	MROB_1023
ESALQ_2200	MROB_5300
ESALQ_2202	MROB_5301
ESALQ_2203	MROB_5302
ESALQ_2204	MROB_5303
ESALQ_2205	MROB_5304
ESALQ_2207	MROB_5305
ESALQ_2208	MROB_5306
ESALQ_2209	MROB_5307
ESALQ_221	MROB_1025
ESALQ_2210	MROB_5308
ESALQ_2211	MROB_5309
ESALQ_2212	MROB_5310
ESALQ_2213	MROB_5311
ESALQ_2214	MROB_5312
ESALQ_2215	MROB_5313
ESALQ_2216	MROB_5314
ESALQ_2217	MROB_5315
ESALQ_2218	MROB_5316
ESALQ_2219	MROB_5317
ESALQ_222	MROB_1026
ESALQ_2220	MROB_5318
ESALQ_2221	MROB_5319
ESALQ_2222	MROB_5321
ESALQ_2223	MROB_5322
ESALQ_2224	MROB_5323
ESALQ_2225	MROB_5324
ESALQ_2226	MROB_5325
ESALQ_2227	MROB_5326
ESALQ_2228	MROB_5327
ESALQ_2229	MROB_5328
ESALQ_223	MROB_1027
ESALQ_2230	MROB_5329
ESALQ_2231	MROB_5330
ESALQ_2232	MROB_5331
ESALQ_2233	MROB_5332
ESALQ_2234	MROB_5333
ESALQ_2235	MROB_5334
ESALQ_2236	MROB_5335
ESALQ_2237	MROB_5336
ESALQ_2238	MROB_5337
ESALQ_2239	MROB_5338
ESALQ_224	MROB_1028
ESALQ_2240	MROB_5339
ESALQ_2241	MROB_5340
ESALQ_2242	MROB_5341
ESALQ_2243	MROB_5342
ESALQ_2244	MROB_5343
ESALQ_2246	MROB_5344
ESALQ_2247	MROB_5345
ESALQ_2249	MROB_5346
ESALQ_2251	MROB_5348
ESALQ_2252	MROB_5349
ESALQ_2253	MROB_5350
ESALQ_2254	MROB_5351
ESALQ_2256	MROB_5352
ESALQ_2257	MROB_5353
ESALQ_2258	MROB_5354
ESALQ_2259	MROB_5355
ESALQ_226	MROB_1029
ESALQ_2260	MROB_5356
ESALQ_2261	MROB_5357
ESALQ_2262	MROB_5358
ESALQ_2263	MROB_5359
ESALQ_2264	MROB_5360
ESALQ_2265	MROB_5361
ESALQ_2266	MROB_5362
ESALQ_2267	MROB_5363
ESALQ_2268	MROB_5365
ESALQ_2269	MROB_5366
ESALQ_227	MROB_1030
ESALQ_2270	MROB_5367
ESALQ_2271	MROB_5370
ESALQ_2273	MROB_5371
ESALQ_2274	MROB_5372
ESALQ_2275	MROB_5373
ESALQ_2276	MROB_5374
ESALQ_2277	MROB_5375
ESALQ_2279	MROB_5376
ESALQ_228	MROB_1031
ESALQ_2280	MROB_5377
ESALQ_2281	MROB_5378
ESALQ_2283	MROB_5380
ESALQ_2284	MROB_5381
ESALQ_2285	MROB_5382
ESALQ_2286	MROB_5383
ESALQ_2287	MROB_5384
ESALQ_2289	MROB_5385
ESALQ_229	MROB_1033
ESALQ_2290	MROB_5386
ESALQ_2291	MROB_5387
ESALQ_2292	MROB_5389
ESALQ_2293	MROB_5390
ESALQ_2294	MROB_5391
ESALQ_2295	MROB_5392
ESALQ_2296	MROB_5393
ESALQ_2297	MROB_5394
ESALQ_2298	MROB_5395
ESALQ_2299	MROB_5396
ESALQ_23	MROB_3945
ESALQ_230	MROB_1034
ESALQ_2300	MROB_5397
ESALQ_2301	MROB_5398
ESALQ_2302	MROB_5399
ESALQ_2303	MROB_5400
ESALQ_2304	MROB_5401
ESALQ_2305	MROB_5402
ESALQ_2306	MROB_5403
ESALQ_2307	MROB_5404
ESALQ_2308	MROB_5405
ESALQ_2309	MROB_5406
ESALQ_231	MROB_1035
ESALQ_2310	MROB_5407
ESALQ_2311	MROB_5408
ESALQ_2312	MROB_5409
ESALQ_2313	MROB_5410
ESALQ_2314	MROB_5411
ESALQ_2315	MROB_5412
ESALQ_2316	MROB_5413
ESALQ_2317	MROB_5415
ESALQ_2318	MROB_5416
ESALQ_2319	MROB_5417
ESALQ_232	MROB_1036
ESALQ_2321	MROB_5420
ESALQ_2322	MROB_5421
ESALQ_2323	MROB_5422
ESALQ_2324	MROB_5423
ESALQ_2325	MROB_5424
ESALQ_2326	MROB_5425
ESALQ_2328	MROB_5427
ESALQ_2329	MROB_5428
ESALQ_233	MROB_1037
ESALQ_2330	MROB_5429
ESALQ_2331	MROB_5431
ESALQ_2332	MROB_5432
ESALQ_2333	MROB_5433
ESALQ_2334	MROB_5434
ESALQ_2335	MROB_5435
ESALQ_2336	MROB_5436
ESALQ_2337	MROB_5437
ESALQ_2338	MROB_5438
ESALQ_2339	MROB_5439
ESALQ_234	MROB_1038
ESALQ_2340	MROB_5440
ESALQ_2341	MROB_5441
ESALQ_2342	MROB_5442
ESALQ_2343	MROB_5443
ESALQ_2344	MROB_5444
ESALQ_2345	MROB_5445
ESALQ_2346	MROB_5446
ESALQ_2347	MROB_5447
ESALQ_2348	MROB_5448
ESALQ_2349	MROB_5449
ESALQ_235	MROB_1039
ESALQ_2350	MROB_5450
ESALQ_2351	MROB_5451
ESALQ_2352	MROB_5452
ESALQ_2353	MROB_5453
ESALQ_2354	MROB_5454
ESALQ_2355	MROB_5455
ESALQ_2356	MROB_5456
ESALQ_2357	MROB_5457
ESALQ_2358	MROB_5458
ESALQ_2359	MROB_5459
ESALQ_236	MROB_1040
ESALQ_2360	MROB_5460
ESALQ_2361	MROB_5461
ESALQ_2362	MROB_5462
ESALQ_2363	MROB_5463
ESALQ_2364	MROB_5464
ESALQ_2365	MROB_5465
ESALQ_2366	MROB_5466
ESALQ_2367	MROB_5467
ESALQ_2368	MROB_5468
ESALQ_2369	MROB_5469
ESALQ_237	MROB_1041
ESALQ_2370	MROB_5470
ESALQ_2371	MROB_5471
ESALQ_2372	MROB_5472
ESALQ_2373	MROB_5473
ESALQ_2374	MROB_5474
ESALQ_2375	MROB_5475
ESALQ_2376	MROB_5476
ESALQ_2377	MROB_5477
ESALQ_2378	MROB_5478
ESALQ_2379	MROB_5479
ESALQ_238	MROB_1042
ESALQ_2380	MROB_5480
ESALQ_2381	MROB_5481
ESALQ_2382	MROB_5482
ESALQ_2383	MROB_5483
ESALQ_2384	MROB_5484
ESALQ_2385	MROB_5485
ESALQ_2386	MROB_5486
ESALQ_2387	MROB_5487
ESALQ_2388	MROB_5488
ESALQ_2389	MROB_5489
ESALQ_239	MROB_1043
ESALQ_2390	MROB_5490
ESALQ_2392	MROB_5491
ESALQ_2393	MROB_5492
ESALQ_2394	MROB_5493
ESALQ_2395	MROB_5494
ESALQ_2396	MROB_5495
ESALQ_2397	MROB_5496
ESALQ_2398	MROB_5497
[truncated: 7,853 more rows]

## Sheet: BLASTp_ESALQ_MANIB
Query_1638	Target_ManiB	pident	length	mismatch	gapopen	qstart	qend	sstart	send	evalue	bitscore
ESALQ_3	MANIB_9571	33.34	2948	1697	67	926	3780	1057	3829	0	1458
ESALQ_7	MANIB_9013	98.86	440	5	0	1	440	1	440	0	899
ESALQ_8	MANIB_9012	97.67	430	10	0	1	430	1	430	0	872
ESALQ_9	MANIB_9011	88.30	342	12	1	1	314	1	342	0	603
ESALQ_11	MANIB_9008	97.03	640	13	1	124	757	3	642	0	1299
ESALQ_12	MANIB_9007	98.39	1115	18	0	34	1148	5	1119	0	2285
ESALQ_13	MANIB_9006	97.45	432	11	0	1	432	1	432	0	863
ESALQ_16	MANIB_9003	67.53	582	110	9	1	571	1	514	0	724
ESALQ_17	MANIB_9002	98.89	451	5	0	1	451	1	451	0	932
ESALQ_18	MANIB_9001	98.29	293	5	0	1	293	1	293	0	593
ESALQ_19	MANIB_9000	96.24	426	16	0	1	426	1	426	0	862
ESALQ_20	MANIB_8999	98.04	510	10	0	1	510	1	510	0	1044
ESALQ_21	MANIB_8998	96.27	375	7	1	1	368	1	375	0	733
ESALQ_22	MANIB_8997	97.39	421	11	0	1	421	1	421	0	858
ESALQ_26	MANIB_8991	89.09	385	7	1	65	414	1	385	0	695
ESALQ_27	MANIB_8990	99.02	410	4	0	1	410	1	410	0	836
ESALQ_30	MANIB_8987	95.38	455	21	0	1	455	1	455	0	843
ESALQ_31	MANIB_8986	84.80	454	6	2	1	391	1	454	0	746
ESALQ_32	MANIB_8985	99.02	612	6	0	1	612	1	612	0	1254
ESALQ_35	MANIB_8982	97.31	260	7	0	1	260	1	260	0	527
ESALQ_36	MANIB_8980	100.00	394	0	0	1	394	1	394	0	805
ESALQ_38	MANIB_8978	94.96	357	17	1	1	356	1	357	0	687
ESALQ_41	MANIB_8975	99.43	350	2	0	1	350	1	350	0	716
ESALQ_42	MANIB_8974	99.22	255	2	0	1	255	1	255	0	513
ESALQ_43	MANIB_8973	98.93	1120	5	1	1	1120	1	1113	0	2276
ESALQ_47	MANIB_8969	98.39	249	4	0	1	249	1	249	0	500
ESALQ_48	MANIB_8968	99.08	653	6	0	1	653	1	653	0	1335
ESALQ_49	MANIB_8967	99.45	544	3	0	1	544	1	544	0	1104
ESALQ_50	MANIB_8966	97.86	374	8	0	1	374	1	374	0	738
ESALQ_52	MANIB_8965	97.71	262	6	0	1	262	1	262	0	528
ESALQ_53	MANIB_8964	99.33	596	4	0	1	596	1	596	0	1214
ESALQ_54	MANIB_8963	97.75	489	11	0	1	489	1	489	0	992
ESALQ_55	MANIB_8962	98.85	1305	15	0	56	1360	127	1431	0	2588
ESALQ_57	MANIB_8960	98.21	446	8	0	1	446	1	446	0	896
ESALQ_58	MANIB_8959	93.03	588	35	1	1	588	1	582	0	1101
ESALQ_59	MANIB_8958	97.13	418	12	0	2	419	4	421	0	821
ESALQ_60	MANIB_8957	94.87	526	24	2	1	524	1	525	0	986
ESALQ_64	MANIB_8953	99.82	550	1	0	1	550	1	550	0	1136
ESALQ_65	MANIB_8952	99.33	598	4	0	1	598	1	598	0	1235
ESALQ_66	MANIB_8951	100.00	432	0	0	89	520	1	432	0	888
ESALQ_70	MANIB_8946	91.77	547	21	2	1	547	1	523	0	994
ESALQ_71	MANIB_8945	97.23	614	16	1	1	614	1	613	0	1213
ESALQ_72	MANIB_8943	98.17	601	11	0	1	601	1	601	0	1197
ESALQ_73	MANIB_8942	99.34	452	3	0	1	452	1	452	0	933
ESALQ_77	MANIB_8938	99.08	1199	11	0	1	1199	1	1199	0	2353
ESALQ_78	MANIB_8937	99.55	885	4	0	1	885	1	885	0	1795
ESALQ_80	MANIB_8935	99.62	265	1	0	1	265	1	265	0	553
ESALQ_81	MANIB_8934	98.11	635	12	0	1	635	1	635	0	1313
ESALQ_82	MANIB_8933	92.60	365	27	0	1	365	69	433	0	674
ESALQ_83	MANIB_8931	95.85	651	26	1	1	650	1	651	0	1234
ESALQ_85	MANIB_8929	100.00	310	0	0	1	310	1	310	0	622
ESALQ_89	MANIB_8926	100.00	390	0	0	1	390	1	390	0	790
ESALQ_90	MANIB_8925	99.02	1829	18	0	1	1829	1	1829	0	3722
ESALQ_91	MANIB_8924	99.45	543	3	0	1	543	1	543	0	1051
ESALQ_92	MANIB_8923	99.71	678	2	0	1	678	1	678	0	1392
ESALQ_93	MANIB_8922	98.77	407	5	0	1	407	1	407	0	832
ESALQ_95	MANIB_8920	97.88	425	9	0	1	425	1	425	0	865
ESALQ_96	MANIB_8919	99.83	589	1	0	1	589	1	589	0	1204
ESALQ_99	MANIB_8917	95.67	646	14	2	43	688	6	637	0	1223
ESALQ_100	MANIB_8916	98.35	423	0	1	1	416	1	423	0	857
ESALQ_101	MANIB_8915	99.20	624	5	0	1	624	1	624	0	1288
ESALQ_103	MANIB_8913	96.21	845	7	1	1	845	1	820	0	1663
ESALQ_104	MANIB_8912	97.90	334	7	0	1	334	1	334	0	672
ESALQ_105	MANIB_8911	99.69	651	2	0	1	651	1	651	0	1327
ESALQ_106	MANIB_8909	99.65	568	2	0	270	837	1	568	0	1176
ESALQ_107	MANIB_8908	100.00	313	0	0	1	313	1	313	0	638
ESALQ_108	MANIB_8907	99.67	898	3	0	1	898	1	898	0	1830
ESALQ_109	MANIB_8906	98.68	756	9	1	8	762	13	768	0	1526
ESALQ_110	MANIB_8905	98.20	612	11	0	1	612	1	612	0	1212
ESALQ_111	MANIB_8904	99.79	476	1	0	1	476	1	476	0	978
ESALQ_112	MANIB_8903	99.50	605	3	0	1	605	1	605	0	1184
ESALQ_114	MANIB_8901	99.91	1113	1	0	1	1113	1	1113	0	2300
ESALQ_115	MANIB_8899	98.87	530	6	0	1	530	1	530	0	1086
ESALQ_117	MANIB_8897	99.72	723	2	0	1	723	1	723	0	1507
ESALQ_118	MANIB_8896	99.43	522	3	0	1	522	1	522	0	1076
ESALQ_120	MANIB_8895	99.31	729	5	0	1	729	1	729	0	1500
ESALQ_121	MANIB_8894	99.54	437	2	0	1	437	1	437	0	868
ESALQ_122	MANIB_8893	99.79	466	1	0	1	466	1	466	0	959
ESALQ_123	MANIB_8892	99.51	607	3	0	1	607	1	607	0	1254
ESALQ_126	MANIB_8889	95.24	399	2	1	1	399	1	382	0	777
ESALQ_127	MANIB_8888	99.54	1307	6	0	1	1307	1	1307	0	2666
ESALQ_129	MANIB_8885	94.86	292	10	1	1	292	5	291	0	564
ESALQ_131	MANIB_8883	85.24	359	18	1	1	324	1	359	0	603
ESALQ_132	MANIB_8882	95.08	935	36	1	1	935	1	925	0	1652
ESALQ_133	MANIB_8881	99.60	1004	4	0	1	1004	102	1105	0	2049
ESALQ_134	MANIB_8880	92.21	462	34	1	1	460	1	462	0	759
ESALQ_136	MANIB_8877	96.48	768	1	1	1	742	1	768	0	1500
ESALQ_137	MANIB_8876	97.69	606	12	2	39	643	1	605	0	1055
ESALQ_138	MANIB_8875	88.41	371	9	1	1	337	1	371	0	655
ESALQ_139	MANIB_8874	100.00	371	0	0	1	371	1	371	0	773
ESALQ_140	MANIB_8873	99.08	545	5	0	1	545	1	545	0	1105
ESALQ_141	MANIB_8872	86.45	583	17	5	5	527	23	603	0	999
ESALQ_143	MANIB_8870	99.72	1085	3	0	1	1085	1	1085	0	2224
ESALQ_145	MANIB_8868	98.93	281	3	0	1	281	1	281	0	570
ESALQ_146	MANIB_8867	98.90	544	4	1	1	544	1	542	0	1070
ESALQ_147	MANIB_8866	84.41	404	32	1	1	404	1	373	0	606
ESALQ_148	MANIB_8865	92.20	1526	82	7	1	1523	1	1492	0	2847
ESALQ_151	MANIB_8862	89.48	1302	104	5	1	1275	1	1296	0	2272
ESALQ_152	MANIB_8861	100.00	272	0	0	1	272	1	272	0	558
ESALQ_154	MANIB_8859	99.79	931	2	0	1	931	99	1029	0	1926
ESALQ_155	MANIB_8858	97.99	497	7	1	1	494	1	497	0	998
ESALQ_156	MANIB_8857	95.36	345	16	0	1	345	1	345	0	680
ESALQ_157	MANIB_8856	99.28	419	3	0	1	419	1	419	0	848
ESALQ_159	MANIB_8854	97.69	303	7	0	1	303	1	303	0	614
ESALQ_160	MANIB_8853	98.87	530	6	0	1	530	1	530	0	1066
ESALQ_161	MANIB_8852	98.22	337	6	0	1	337	1	337	0	675
ESALQ_162	MANIB_422	99.24	523	4	0	1	523	1	523	0	1061
ESALQ_165	MANIB_419	97.18	959	13	2	1	959	1	945	0	1815
ESALQ_166	MANIB_418	100.00	1067	0	0	1	1067	1	1067	0	2212
ESALQ_168	MANIB_416	92.64	462	4	1	1	462	1	432	0	807
ESALQ_169	MANIB_415	99.32	589	4	0	1	589	143	731	0	1199
ESALQ_170	MANIB_414	98.44	1154	17	1	1	1153	1	1154	0	2310
ESALQ_171	MANIB_413	99.72	1074	3	0	1	1074	1	1074	0	2164
ESALQ_175	MANIB_409	96.79	530	11	1	1	524	1	530	0	1045
ESALQ_176	MANIB_408	94.63	298	11	1	1	298	1	293	0	513
ESALQ_177	MANIB_407	99.68	316	1	0	1	316	1	316	0	660
ESALQ_179	MANIB_406	99.56	684	3	0	1	684	1	684	0	1409
ESALQ_180	MANIB_405	99.70	671	2	0	1	671	1	671	0	1338
ESALQ_181	MANIB_404	99.48	578	3	0	1	578	1	578	0	1177
ESALQ_183	MANIB_402	99.34	452	3	0	1	452	1	452	0	909
ESALQ_185	MANIB_401	95.27	317	11	1	1	313	1	317	0	620
ESALQ_187	MANIB_398	97.79	994	18	1	1	990	1	994	0	2003
ESALQ_189	MANIB_396	97.04	506	15	0	1	506	1	506	0	1015
ESALQ_190	MANIB_395	98.82	1190	7	1	1	1183	1	1190	0	2385
ESALQ_192	MANIB_393	91.33	369	9	1	1	369	1	346	0	607
ESALQ_195	MANIB_391	99.50	992	5	0	1	992	1	992	0	1997
ESALQ_196	MANIB_389	99.21	635	5	0	1	635	1	635	0	1297
ESALQ_198	MANIB_387	98.29	703	12	0	1	703	1	703	0	1432
ESALQ_199	MANIB_386	98.79	661	8	0	1	661	1	661	0	1341
ESALQ_200	MANIB_385	99.01	906	9	0	1	906	1	906	0	1830
ESALQ_201	MANIB_384	97.38	1182	31	0	1	1182	1	1182	0	2380
ESALQ_203	MANIB_382	100.00	334	0	0	1	334	1	334	0	686
ESALQ_204	MANIB_381	99.19	867	7	0	1	867	1	867	0	1799
ESALQ_205	MANIB_380	95.31	852	37	2	1	852	1	849	0	1655
ESALQ_207	MANIB_377	98.65	296	4	0	1	296	1	296	0	605
ESALQ_208	MANIB_376	98.85	1127	13	0	1	1127	1	1127	0	2318
ESALQ_209	MANIB_375	99.09	329	3	0	1	329	1	329	0	669
ESALQ_211	MANIB_373	95.64	551	17	2	1	544	1	551	0	1068
ESALQ_212	MANIB_372	97.72	394	9	0	1	394	1	394	0	782
ESALQ_214	MANIB_370	97.38	458	10	1	1	456	1	458	0	904
ESALQ_215	MANIB_369	99.18	612	5	0	1	612	1	612	0	1246
ESALQ_217	MANIB_366	99.68	316	1	0	1	316	1	316	0	649
ESALQ_218	MANIB_364	99.50	597	3	0	1	597	1	597	0	1194
ESALQ_219	MANIB_363	98.64	662	9	0	1	662	357	1018	0	1323
ESALQ_220	MANIB_363	98.98	295	3	0	1	295	1	295	0	603
ESALQ_221	MANIB_362	99.80	503	1	0	1	503	1	503	0	1050
ESALQ_224	MANIB_359	98.07	779	15	0	1	779	1	779	0	1599
ESALQ_226	MANIB_357	98.71	387	5	0	1	387	1	387	0	783
ESALQ_228	MANIB_355	98.08	469	9	0	1	469	1	469	0	934
ESALQ_229	MANIB_353	91.96	1020	36	2	1	978	1	1016	0	1905
ESALQ_230	MANIB_352	98.64	294	4	0	1	294	90	383	0	595
ESALQ_231	MANIB_351	99.51	409	2	0	1	409	1	409	0	830
ESALQ_233	MANIB_350	98.39	996	16	0	1	996	1	996	0	2003
ESALQ_235	MANIB_348	99.18	486	4	0	1	486	1	486	0	927
ESALQ_236	MANIB_347	99.43	529	3	0	1	529	1	529	0	1055
ESALQ_237	MANIB_346	99.12	457	2	1	1	457	1	455	0	880
ESALQ_238	MANIB_345	95.36	280	13	0	1	280	1	280	0	544
ESALQ_239	MANIB_344	99.43	530	3	0	1	530	1	530	0	1075
ESALQ_240	MANIB_343	85.22	345	10	1	1	304	1	345	0	597
ESALQ_241	MANIB_342	97.54	448	11	0	1	448	1	448	0	917
ESALQ_242	MANIB_341	99.25	398	3	0	1	398	1	398	0	810
ESALQ_243	MANIB_340	99.27	411	3	0	1	411	1	411	0	836
ESALQ_245	MANIB_338	98.67	376	5	0	1	376	1	376	0	761
ESALQ_246	MANIB_337	96.56	668	23	0	1	668	1	668	0	1347
ESALQ_247	MANIB_336	98.88	357	4	0	1	357	1	357	0	737
ESALQ_248	MANIB_335	95.92	588	1	1	1	588	1	565	0	1144
ESALQ_249	MANIB_334	99.71	342	1	0	1	342	1	342	0	712
ESALQ_251	MANIB_332	98.28	1044	18	0	1	1044	1	1044	0	2115
ESALQ_253	MANIB_330	99.82	559	0	1	1	559	1	558	0	1132
ESALQ_254	MANIB_329	99.25	401	3	0	1	401	1	401	0	822
ESALQ_255	MANIB_328	95.99	1047	25	1	12	1058	16	1045	0	2068
ESALQ_256	MANIB_327	96.44	505	18	0	1	505	1	505	0	1000
ESALQ_257	MANIB_326	98.68	757	10	0	1	757	1	757	0	1563
ESALQ_258	MANIB_325	98.70	384	5	0	1	384	1	384	0	786
ESALQ_259	MANIB_324	99.03	826	8	0	1	826	1	826	0	1667
ESALQ_260	MANIB_323	99.74	381	1	0	1	381	1	381	0	668
ESALQ_261	MANIB_322	99.82	561	1	0	1	561	1	561	0	1154
ESALQ_262	MANIB_321	85.43	405	7	1	1	405	1	353	0	677
ESALQ_263	MANIB_320	99.96	2433	1	0	1	2433	1	2433	0	5035
ESALQ_264	MANIB_319	97.76	268	6	0	1	268	1	268	0	540
ESALQ_265	MANIB_318	99.72	705	2	0	1	705	1	705	0	1462
ESALQ_266	MANIB_317	87.19	320	41	0	1	320	1	320	0	558
ESALQ_267	MANIB_316	98.67	452	6	0	1	452	1	452	0	918
ESALQ_269	MANIB_10908	100.00	316	0	0	24	339	1	316	0	653
ESALQ_270	MANIB_313	99.78	899	2	0	1	899	1	899	0	1858
ESALQ_271	MANIB_312	96.32	543	20	0	1	543	1	543	0	1056
ESALQ_272	MANIB_311	98.28	814	14	0	1	814	1	814	0	1634
ESALQ_273	MANIB_310	92.00	550	18	2	1	524	1	550	0	964
ESALQ_274	MANIB_309	99.52	421	2	0	1	421	1	421	0	865
ESALQ_275	MANIB_308	99.62	265	1	0	1	265	1	265	0	546
ESALQ_276	MANIB_307	98.29	527	6	1	1	527	1	524	0	1035
ESALQ_277	MANIB_306	99.54	1510	6	1	1	1509	1	1510	0	3132
ESALQ_278	MANIB_305	97.93	435	9	0	1	435	1	435	0	878
ESALQ_279	MANIB_304	98.63	1019	14	0	1	1019	1	1019	0	2016
ESALQ_281	MANIB_302	98.08	731	14	0	1	731	1	731	0	1489
ESALQ_283	MANIB_301	98.27	577	9	1	1	576	1	577	0	1151
ESALQ_285	MANIB_299	98.34	1142	19	0	1	1142	1	1142	0	2260
ESALQ_286	MANIB_298	78.90	839	101	9	1	839	1	763	0	956
ESALQ_289	MANIB_295	99.77	432	1	0	4	435	59	490	0	882
ESALQ_291	MANIB_293	87.03	532	10	4	1	532	1	473	0	911
ESALQ_292	MANIB_292	97.28	405	11	0	1	405	1	405	0	806
ESALQ_293	MANIB_290	98.02	1514	22	2	1	1508	9	1520	0	3058
ESALQ_294	MANIB_289	87.44	454	33	2	1	453	1	431	0	773
ESALQ_295	MANIB_288	99.50	400	2	0	1	400	1	400	0	825
ESALQ_297	MANIB_286	93.98	415	20	1	1	415	1	410	0	763
ESALQ_299	MANIB_283	95.83	288	7	1	1	288	1	283	0	545
ESALQ_300	MANIB_282	96.38	304	6	1	1	299	1	304	0	602
ESALQ_301	MANIB_281	99.30	428	2	1	1	428	1	427	0	804
ESALQ_302	MANIB_280	93.52	432	28	0	4	435	51	482	0	830
ESALQ_304	MANIB_278	99.15	353	3	0	1	353	1	353	0	713
ESALQ_305	MANIB_277	96.53	288	6	1	1	288	1	284	0	538
ESALQ_307	MANIB_275	77.27	673	85	10	1	669	1	609	0	975
ESALQ_309	MANIB_273	97.18	673	19	0	1	673	1	673	0	1326
ESALQ_310	MANIB_272	91.25	297	3	2	1	296	1	275	0	536
ESALQ_311	MANIB_271	99.29	283	2	0	1	283	1	283	0	566
ESALQ_312	MANIB_270	98.95	476	5	0	4	479	5	480	0	971
ESALQ_313	MANIB_267	96.92	389	12	0	457	845	1	389	0	768
ESALQ_314	MANIB_265	94.29	701	5	1	99	764	160	860	0	1329
ESALQ_317	MANIB_261	98.76	644	8	0	1	644	1	644	0	1274
ESALQ_319	MANIB_259	98.91	457	5	0	1	457	1	457	0	937
ESALQ_322	MANIB_258	88.96	326	9	1	4	302	253	578	0	582
ESALQ_323	MANIB_257	99.82	556	1	0	1	556	1	556	0	1125
ESALQ_324	MANIB_256	98.34	361	6	0	1	361	1	361	0	734
ESALQ_325	MANIB_255	99.81	515	1	0	1	515	1	515	0	1051
ESALQ_326	MANIB_254	97.94	486	10	0	1	486	1	486	0	998
ESALQ_327	MANIB_253	99.38	646	4	0	1	646	1	646	0	1323
ESALQ_328	MANIB_252	98.72	1646	17	1	1	1642	1	1646	0	3385
ESALQ_329	MANIB_251	95.57	497	15	2	1	491	1	496	0	956
ESALQ_331	MANIB_249	99.16	479	4	0	1	479	1	479	0	973
ESALQ_332	MANIB_248	86.44	686	27	3	1	686	1	620	0	1142
ESALQ_335	MANIB_245	91.46	316	1	1	1	316	1	290	0	548
ESALQ_337	MANIB_243	89.32	515	2	1	1	515	1	462	0	921
ESALQ_338	MANIB_242	90.76	357	33	0	19	375	19	375	0	662
ESALQ_339	MANIB_241	95.10	612	26	1	1	612	1	608	0	1201
ESALQ_343	MANIB_237	99.50	402	2	0	1	402	1	402	0	776
ESALQ_344	MANIB_235	90.57	297	16	1	1	297	1	285	0	512
ESALQ_345	MANIB_234	98.08	468	7	1	1	468	1	466	0	948
ESALQ_346	MANIB_233	97.37	266	7	0	246	511	1	266	0	537
ESALQ_347	MANIB_231	98.06	309	6	0	1	309	131	439	0	639
ESALQ_348	MANIB_230	98.98	488	5	0	1	488	1	488	0	1001
ESALQ_349	MANIB_229	99.48	769	4	0	1	769	1	769	0	1607
ESALQ_350	MANIB_228	85.45	433	9	2	1	433	1	379	0	732
ESALQ_352	MANIB_226	99.64	275	1	0	1	275	1	275	0	561
ESALQ_353	MANIB_223	95.33	578	23	2	303	880	1	574	0	1087
ESALQ_354	MANIB_222	98.24	737	12	1	1	736	1	737	0	1488
ESALQ_355	MANIB_221	99.39	327	2	0	1	327	1	327	0	674
ESALQ_356	MANIB_220	88.61	553	63	0	1	553	1	553	0	857
ESALQ_357	MANIB_219	96.60	530	18	0	1	530	1	530	0	1065
ESALQ_358	MANIB_218	96.85	445	13	1	1	445	1	444	0	857
ESALQ_360	MANIB_216	100.00	333	0	0	1	333	1	333	0	671
ESALQ_361	MANIB_215	96.69	815	26	1	1	814	1	815	0	1542
ESALQ_362	MANIB_214	99.32	1607	11	0	1	1607	1	1607	0	3276
ESALQ_363	MANIB_213	99.46	1468	8	0	1	1468	1	1468	0	3008
ESALQ_364	MANIB_212	100.00	352	0	0	1	352	1	352	0	728
ESALQ_365	MANIB_211	99.73	736	2	0	40	775	1	736	0	1505
ESALQ_367	MANIB_209	94.58	1033	2	2	1	979	1	1033	0	2008
ESALQ_368	MANIB_208	84.55	343	1	1	1	343	1	291	0	578
ESALQ_369	MANIB_207	97.66	342	8	0	1	342	1	342	0	692
ESALQ_370	MANIB_206	95.79	380	16	0	339	718	463	842	0	631
ESALQ_371	MANIB_205	96.68	722	4	1	1	702	1	722	0	1430
ESALQ_372	MANIB_204	93.51	663	3	1	1	663	1	623	0	1276
ESALQ_373	MANIB_203	94.04	554	4	1	1	525	1	554	0	1058
ESALQ_374	MANIB_202	90.54	539	38	3	1	527	1	538	0	974
ESALQ_375	MANIB_201	99.72	358	1	0	1	358	1	358	0	728
ESALQ_376	MANIB_200	99.62	262	1	0	1	262	1	262	0	526
ESALQ_377	MANIB_199	98.58	282	4	0	1	282	112	393	0	578
ESALQ_378	MANIB_198	97.63	1096	21	1	1	1096	7	1097	0	2145
ESALQ_379	MANIB_197	98.89	2071	22	1	1	2070	1	2071	0	4157
ESALQ_381	MANIB_195	100.00	552	0	0	1	552	1	552	0	1106
ESALQ_382	MANIB_194	99.34	302	2	0	1	302	1	302	0	619
ESALQ_383	MANIB_193	98.74	1592	20	0	1	1592	1	1592	0	3251
ESALQ_384	MANIB_192	99.36	941	6	0	1	941	1	941	0	1878
ESALQ_385	MANIB_191	99.21	629	5	0	1	629	1	629	0	1267
ESALQ_386	MANIB_190	97.19	1104	30	1	93	1195	1	1104	0	2211
ESALQ_388	MANIB_188	98.69	381	5	0	1	381	1	381	0	777
ESALQ_389	MANIB_187	97.16	352	7	1	1	352	1	349	0	716
ESALQ_390	MANIB_186	99.53	860	4	0	1	860	1	860	0	1767
ESALQ_391	MANIB_185	99.77	2141	5	0	1	2141	1	2141	0	4395
ESALQ_392	MANIB_184	98.72	312	4	0	1	312	1	312	0	633
ESALQ_393	MANIB_183	99.50	403	2	0	1	403	1	403	0	811
ESALQ_394	MANIB_182	96.15	390	11	2	1	390	1	386	0	681
ESALQ_395	MANIB_181	99.80	509	1	0	1	509	1	509	0	1030
ESALQ_396	MANIB_180	86.70	361	5	2	1	318	1	361	0	625
ESALQ_398	MANIB_9865	99.73	375	1	0	1	375	1	375	0	771
ESALQ_399	MANIB_9866	99.20	1127	9	0	1	1127	1	1127	0	2243
ESALQ_400	MANIB_9867	98.41	1070	17	0	1	1070	1	1070	0	2149
ESALQ_401	MANIB_9868	91.68	565	31	3	1	563	1	551	0	1033
ESALQ_403	MANIB_9869	99.31	290	2	0	1	290	1	290	0	588
ESALQ_404	MANIB_9870	94.29	508	28	1	1	508	192	698	0	907
ESALQ_405	MANIB_9871	97.08	343	10	0	1	343	1	343	0	699
ESALQ_406	MANIB_9872	99.67	307	1	0	1	307	1	307	0	637
ESALQ_407	MANIB_9873	99.80	494	0	1	478	970	515	1008	0	979
ESALQ_409	MANIB_9875	99.00	300	3	0	1	300	1	300	0	612
ESALQ_410	MANIB_9876	98.65	669	9	0	1	669	2	670	0	1365
ESALQ_411	MANIB_9877	99.50	400	2	0	1	400	39	438	0	815
ESALQ_413	MANIB_9879	98.92	371	4	0	1	371	1	371	0	762
ESALQ_415	MANIB_9881	99.01	503	5	0	1	503	1	503	0	1034
ESALQ_416	MANIB_9882	90.91	539	1	1	1	539	1	491	0	988
ESALQ_417	MANIB_3190	97.02	571	17	0	1	571	1	571	0	1142
ESALQ_418	MANIB_3189	94.89	626	3	1	125	750	1	597	0	1221
ESALQ_419	MANIB_3188	95.67	485	20	1	1	485	1	484	0	823
ESALQ_420	MANIB_3187	99.59	488	2	0	1	488	1	488	0	999
ESALQ_421	MANIB_3186	99.16	478	4	0	1	478	1	478	0	983
ESALQ_422	MANIB_3185	98.82	510	6	0	1	510	18	527	0	1051
ESALQ_423	MANIB_3183	97.87	1035	22	0	1	1035	1	1035	0	2091
ESALQ_425	MANIB_3180	99.38	643	4	0	1	643	1	643	0	1333
ESALQ_426	MANIB_3179	99.14	1507	13	0	1	1507	1	1507	0	3078
ESALQ_427	MANIB_3178	97.29	627	17	0	1	627	1	627	0	1214
ESALQ_428	MANIB_3177	99.39	330	2	0	1	330	1	330	0	668
ESALQ_429	MANIB_3176	99.40	827	5	0	1	827	1	827	0	1694
ESALQ_430	MANIB_3175	98.63	292	4	0	1	292	1	292	0	592
ESALQ_431	MANIB_3174	100.00	272	0	0	1	272	1	272	0	562
ESALQ_432	MANIB_3173	96.96	362	11	0	1	362	1	362	0	703
ESALQ_433	MANIB_3172	98.87	442	5	0	9	450	1	442	0	893
ESALQ_434	MANIB_3171	98.51	807	11	1	1	806	1	807	0	1583
ESALQ_435	MANIB_3170	97.03	472	14	0	1	472	1	472	0	936
ESALQ_436	MANIB_3169	100.00	253	0	0	1	253	1	253	0	520
ESALQ_437	MANIB_3168	99.50	597	3	0	1	597	1	597	0	1236
ESALQ_438	MANIB_3167	99.03	516	5	0	1	516	1	516	0	1073
ESALQ_439	MANIB_3166	99.65	1151	4	0	1	1151	1	1151	0	2348
ESALQ_440	MANIB_3165	99.87	743	1	0	1	743	1	743	0	1524
ESALQ_441	MANIB_3164	99.40	672	4	0	1	672	1	672	0	1354
ESALQ_442	MANIB_3163	100.00	724	0	0	1	724	1	724	0	1474
ESALQ_444	MANIB_3161	98.28	873	15	0	1	873	1	873	0	1773
ESALQ_446	MANIB_3159	98.99	993	9	1	1	992	1	993	0	2033
ESALQ_447	MANIB_3158	98.85	520	6	0	1	520	1	520	0	1041
ESALQ_449	MANIB_3156	95.21	1149	41	5	1	1135	1	1149	0	2024
ESALQ_450	MANIB_3155	97.73	1099	23	1	1	1099	1	1097	0	2205
ESALQ_452	MANIB_3153	98.94	852	9	0	1	852	1	852	0	1750
ESALQ_453	MANIB_3152	99.44	533	3	0	1	533	1	533	0	1091
ESALQ_455	MANIB_3150	100.00	289	0	0	1	289	1	289	0	597
ESALQ_456	MANIB_3149	96.34	273	10	0	1	273	1	273	0	545
ESALQ_457	MANIB_3148	99.38	481	3	0	1	481	342	822	0	989
ESALQ_458	MANIB_3147	99.55	441	2	0	1	441	1	441	0	907
ESALQ_459	MANIB_3146	89.54	1080	56	5	1	1072	1	1031	0	1932
ESALQ_460	MANIB_3145	98.68	453	6	0	1	453	1	453	0	930
ESALQ_462	MANIB_3143	98.11	475	5	1	1	475	11	481	0	943
ESALQ_463	MANIB_3143	96.78	404	11	1	5	406	558	961	0	687
ESALQ_465	MANIB_3141	99.23	260	2	0	1	260	1	260	0	529
ESALQ_466	MANIB_3140	100.00	264	0	0	1	264	1	264	0	546
ESALQ_468	MANIB_3137	99.75	397	1	0	1	397	1	397	0	821
ESALQ_469	MANIB_3136	98.55	691	10	0	1	691	1	691	0	1424
ESALQ_470	MANIB_3135	91.59	535	4	2	1	494	1	535	0	972
ESALQ_471	MANIB_3134	99.41	676	4	0	1	676	1	676	0	1408
ESALQ_474	MANIB_3131	98.82	1018	4	1	1	1018	1	1010	0	2086
ESALQ_475	MANIB_3130	98.33	419	7	0	1	419	1	419	0	862
ESALQ_476	MANIB_3129	97.62	336	8	0	1	336	1	336	0	644
ESALQ_477	MANIB_3128	99.47	561	3	0	1	561	1	561	0	1124
ESALQ_478	MANIB_3127	98.76	1213	15	0	1	1213	1	1213	0	2470
ESALQ_480	MANIB_3125	97.80	774	17	0	1	774	1	774	0	1565
ESALQ_482	MANIB_3123	97.51	401	10	0	1	401	1	401	0	761
ESALQ_484	MANIB_3121	99.65	568	2	0	1	568	1	568	0	1154
ESALQ_485	MANIB_3120	100.00	496	0	0	1	496	1	496	0	1026
ESALQ_487	MANIB_3119	99.02	305	3	0	1	305	1	305	0	613
ESALQ_488	MANIB_3118	97.56	328	8	0	3	330	1	328	0	652
ESALQ_489	MANIB_3117	99.27	275	2	0	1	275	1	275	0	549
ESALQ_491	MANIB_3116	97.29	774	21	0	1	774	1	774	0	1558
ESALQ_493	MANIB_3114	98.88	981	11	0	1	981	1	981	0	2027
ESALQ_496	MANIB_3111	97.83	277	6	0	1	277	1	277	0	566
ESALQ_497	MANIB_3110	99.56	685	3	0	1	685	1	685	0	1427
ESALQ_498	MANIB_3109	99.56	452	2	0	1	452	1	452	0	904
ESALQ_499	MANIB_3108	95.41	785	36	0	1	785	1	785	0	1195
ESALQ_500	MANIB_3107	98.94	473	5	0	1	473	1	473	0	960
ESALQ_501	MANIB_3106	99.39	655	4	0	1	655	1	655	0	1352
ESALQ_502	MANIB_3105	97.14	385	11	0	1	385	1	385	0	763
ESALQ_506	MANIB_3101	98.94	378	4	0	1	378	1	378	0	774
ESALQ_507	MANIB_3100	99.28	829	4	1	1	827	1	829	0	1686
ESALQ_508	MANIB_3099	90.83	349	24	3	368	708	228	576	0	635
ESALQ_509	MANIB_3098	100.00	305	0	0	1	305	1	305	0	600
ESALQ_510	MANIB_3097	98.19	939	10	1	15	946	68	1006	0	1862
ESALQ_513	MANIB_3094	99.18	364	3	0	1	364	1	364	0	741
ESALQ_514	MANIB_3093	99.62	527	2	0	1	527	1	527	0	1083
ESALQ_515	MANIB_3092	98.40	312	5	0	1	312	1	312	0	625
ESALQ_516	MANIB_3091	100.00	250	0	0	1	250	1	250	0	515
ESALQ_517	MANIB_3090	99.32	740	4	1	1	740	1	739	0	1441
ESALQ_518	MANIB_3089	99.41	1010	5	1	1	1009	1	1010	0	2059
ESALQ_519	MANIB_3088	99.71	694	2	0	1	694	326	1019	0	1429
ESALQ_520	MANIB_3087	99.64	554	2	0	1	554	140	693	0	1118
ESALQ_521	MANIB_3086	97.54	691	16	1	1	691	1	690	0	1345
ESALQ_523	MANIB_3084	98.99	691	7	0	1	691	1	691	0	1389
ESALQ_524	MANIB_3083	95.77	284	12	0	1	284	1	284	0	569
ESALQ_525	MANIB_3082	96.61	295	10	0	1	295	1	295	0	578
ESALQ_527	MANIB_3080	99.82	541	1	0	11	551	5	545	0	1100
ESALQ_528	MANIB_3079	99.04	837	7	1	1	836	1	837	0	1693
ESALQ_529	MANIB_3078	98.27	1096	11	1	1	1088	1	1096	0	2223
ESALQ_531	MANIB_3076	97.49	399	10	0	1	399	1	399	0	800
ESALQ_532	MANIB_3075	97.35	982	20	2	1	980	1	978	0	1904
ESALQ_533	MANIB_3074	93.26	638	9	1	1	604	1	638	0	1203
ESALQ_534	MANIB_3073	99.24	263	2	0	1	263	1	263	0	533
ESALQ_535	MANIB_3072	87.85	362	22	2	1	340	1	362	0	612
ESALQ_536	MANIB_3071	98.99	496	5	0	70	565	1	496	0	1035
ESALQ_537	MANIB_3070	98.35	605	10	0	1	605	1	605	0	1179
ESALQ_538	MANIB_3069	98.18	606	5	1	1	606	1	600	0	1214
ESALQ_540	MANIB_3067	99.84	637	1	0	1	637	1	637	0	1281
ESALQ_541	MANIB_3066	98.98	293	3	0	1	293	1	293	0	610
ESALQ_542	MANIB_3065	99.30	572	4	0	1	572	1	572	0	1147
ESALQ_543	MANIB_3064	99.48	579	3	0	1	579	1	579	0	1166
ESALQ_544	MANIB_3063	98.91	368	4	0	1	368	1	368	0	759
ESALQ_545	MANIB_3062	99.35	306	2	0	1	306	1	306	0	637
ESALQ_546	MANIB_3061	98.77	730	7	1	1	730	56	783	0	1454
ESALQ_547	MANIB_3060	99.62	262	1	0	1	262	1	262	0	531
ESALQ_548	MANIB_3059	99.61	255	1	0	1	255	1	255	0	521
ESALQ_550	MANIB_3057	99.39	492	3	0	1	492	1	492	0	982
ESALQ_551	MANIB_3056	98.95	477	5	0	1	477	1	477	0	971
ESALQ_552	MANIB_3055	99.37	1277	8	0	1	1277	1	1277	0	2582
ESALQ_553	MANIB_3054	100.00	845	0	0	1	845	1	845	0	1738
ESALQ_554	MANIB_3053	100.00	363	0	0	1	363	1	363	0	745
ESALQ_555	MANIB_3052	99.68	939	3	0	1	939	1	939	0	1950
ESALQ_557	MANIB_3051	97.74	443	10	0	1	443	1	443	0	895
ESALQ_558	MANIB_3050	98.66	299	4	0	1	299	1	299	0	595
ESALQ_559	MANIB_3049	98.99	593	6	0	1	593	1	593	0	1206
ESALQ_560	MANIB_3048	99.40	664	4	0	1	664	1	664	0	1369
ESALQ_561	MANIB_3047	100.00	396	0	0	1	396	1	396	0	802
ESALQ_563	MANIB_3045	98.77	570	3	1	1	570	1	566	0	1091
ESALQ_565	MANIB_3043	99.53	425	2	0	1	425	1	425	0	856
ESALQ_566	MANIB_3042	98.92	464	5	0	1	464	1	464	0	942
ESALQ_568	MANIB_3040	97.39	918	14	1	1	908	1	918	0	1783
ESALQ_569	MANIB_3039	98.47	393	6	0	1	393	1	393	0	793
ESALQ_570	MANIB_3038	98.53	1500	22	0	34	1533	5	1504	0	3079
ESALQ_571	MANIB_3037	94.65	898	22	1	1	872	1	898	0	1732
ESALQ_573	MANIB_3035	99.51	411	2	0	1	411	1	411	0	847
ESALQ_574	MANIB_3034	96.22	952	35	1	1	952	1	951	0	1847
ESALQ_575	MANIB_3033	99.80	491	1	0	1	491	1	491	0	1014
ESALQ_576	MANIB_3032	99.18	1345	11	0	1	1345	1	1345	0	2737
ESALQ_577	MANIB_3031	96.28	753	28	0	1	753	1	753	0	1508
ESALQ_578	MANIB_3030	89.91	446	2	1	1	446	1	403	0	779
ESALQ_580	MANIB_3028	97.74	442	10	0	1	442	1	442	0	881
ESALQ_581	MANIB_3027	98.97	780	7	1	1	779	1	780	0	1546
ESALQ_582	MANIB_3026	99.07	537	5	0	1	537	1	537	0	1104
ESALQ_584	MANIB_3024	99.72	711	2	0	1	711	1	711	0	1459
ESALQ_585	MANIB_3023	99.51	609	3	0	1	609	1	609	0	1244
ESALQ_587	MANIB_3021	99.23	260	2	0	1	260	1	260	0	535
ESALQ_588	MANIB_3020	98.11	2121	37	1	1	2121	1	2118	0	4204
ESALQ_589	MANIB_3019	97.96	1175	24	0	1	1175	1	1175	0	2300
ESALQ_590	MANIB_3018	99.87	750	1	0	1	750	1	750	0	1542
ESALQ_591	MANIB_3016	89.17	757	21	3	1	757	1	696	0	1373
ESALQ_593	MANIB_3013	98.76	1132	14	0	83	1214	5	1136	0	2253
ESALQ_594	MANIB_3012	99.06	319	3	0	1	319	1	319	0	644
ESALQ_595	MANIB_3011	97.65	341	8	0	1	341	1	341	0	697
ESALQ_596	MANIB_3010	96.17	731	28	0	1	731	1	731	0	1452
ESALQ_597	MANIB_3009	99.03	411	4	0	1	411	1	411	0	825
ESALQ_599	MANIB_3007	98.14	430	5	2	1	427	1	430	0	845
ESALQ_600	MANIB_3006	99.60	495	2	0	1	495	1	495	0	1028
ESALQ_601	MANIB_3005	99.69	654	2	0	1	654	1	654	0	1356
ESALQ_603	MANIB_3003	99.67	299	1	0	1	299	1	299	0	607
ESALQ_605	MANIB_3001	86.67	300	13	3	1	273	1	300	0	509
ESALQ_606	MANIB_3000	98.06	825	16	0	1	825	1	825	0	1680
ESALQ_607	MANIB_2999	99.11	337	3	0	1	337	1	337	0	689
ESALQ_608	MANIB_2997	90.62	405	33	2	1	404	1	401	0	643
ESALQ_609	MANIB_3015	99.07	429	4	0	1	429	1	429	0	864
ESALQ_610	MANIB_2996	98.56	416	6	0	1	416	1	416	0	857
ESALQ_612	MANIB_2994	99.24	396	3	0	1	396	1	396	0	794
ESALQ_614	MANIB_2992	98.01	905	18	0	1	905	1	905	0	1795
ESALQ_615	MANIB_2991	98.99	593	6	0	1	593	1	593	0	1206
ESALQ_616	MANIB_2990	100.00	288	0	0	36	323	1	288	0	594
ESALQ_617	MANIB_2989	98.35	1692	25	1	1	1692	1	1689	0	3383
ESALQ_618	MANIB_2988	92.29	415	28	1	1	411	1	415	0	726
ESALQ_621	MANIB_2985	99.17	480	4	0	1	480	1	480	0	958
ESALQ_622	MANIB_2984	99.38	322	2	0	1	322	1	322	0	643
ESALQ_623	MANIB_2983	98.35	363	6	0	1	363	1	363	0	721
ESALQ_624	MANIB_2982	89.10	1743	98	11	1	1700	1	1694	0	2981
ESALQ_626	MANIB_2980	99.71	339	1	0	1	339	1	339	0	704
ESALQ_627	MANIB_2979	98.39	311	5	0	1	311	1	311	0	620
ESALQ_630	MANIB_2976	99.62	264	1	0	1	264	1	264	0	542
ESALQ_631	MANIB_2975	97.74	310	5	1	1	308	1	310	0	616
ESALQ_632	MANIB_2974	98.79	990	6	1	1	984	337	1326	0	1955
ESALQ_633	MANIB_2973	98.15	701	12	1	1	700	1	701	0	1386
ESALQ_634	MANIB_2972	90.99	566	28	4	1	544	1	565	0	879
ESALQ_635	MANIB_2971	99.32	587	4	0	1	587	1	587	0	1199
ESALQ_638	MANIB_2970	94.09	491	8	2	1	489	170	641	0	936
ESALQ_639	MANIB_2969	96.67	1200	39	1	1	1199	1	1200	0	2362
ESALQ_640	MANIB_2968	96.95	394	12	0	1	394	1	394	0	799
ESALQ_641	MANIB_2966	90.28	319	21	2	1	319	1	309	0	574
ESALQ_642	MANIB_2965	96.49	399	14	0	1	399	1	399	0	792
ESALQ_643	MANIB_2964	96.87	319	10	0	1	319	1	319	0	643
ESALQ_645	MANIB_2962	99.02	509	5	0	59	567	12	520	0	1030
ESALQ_646	MANIB_2961	99.43	353	2	0	1	353	1	353	0	724
ESALQ_647	MANIB_2959	99.34	304	2	0	1	304	1	304	0	618
ESALQ_648	MANIB_2958	97.92	337	7	0	1	337	1	337	0	679
ESALQ_649	MANIB_2957	99.59	724	3	0	1	724	1	724	0	1481
ESALQ_651	MANIB_2955	92.06	642	47	1	1	638	1	642	0	1219
ESALQ_652	MANIB_2954	99.78	453	1	0	1	453	1	453	0	943
ESALQ_653	MANIB_2953	98.63	511	7	0	1	511	1	511	0	1047
ESALQ_654	MANIB_2952	98.59	498	7	0	1	498	1	498	0	1014
ESALQ_655	MANIB_2951	98.60	357	4	1	1	357	1	356	0	697
ESALQ_656	MANIB_2950	99.67	605	2	0	1	605	1	605	0	1250
ESALQ_659	MANIB_2948	99.79	478	1	0	1	478	1	478	0	964
ESALQ_661	MANIB_2946	98.52	405	6	0	1	405	1	405	0	832
ESALQ_663	MANIB_2944	97.32	522	14	0	1	522	1	522	0	1057
ESALQ_664	MANIB_2943	97.97	395	8	0	465	859	18	412	0	759
ESALQ_665	MANIB_2941	98.23	451	8	0	1	451	1	451	0	920
ESALQ_666	MANIB_2940	96.13	284	10	1	1	284	1	283	0	552
ESALQ_667	MANIB_2939	96.27	429	16	0	1	429	1	429	0	833
ESALQ_668	MANIB_2938	96.24	399	14	1	1	399	1	398	0	752
ESALQ_669	MANIB_2937	97.97	1279	16	1	1	1269	1	1279	0	2590
ESALQ_670	MANIB_2936	98.69	535	7	0	1	535	1	535	0	1083
ESALQ_671	MANIB_2935	96.50	257	7	1	1	255	1	257	0	501
ESALQ_672	MANIB_2934	98.04	611	12	0	1	611	1	611	0	1240
ESALQ_673	MANIB_2933	97.74	443	10	0	1	443	1	443	0	887
ESALQ_674	MANIB_2932	100.00	486	0	0	1	486	1	486	0	1007
ESALQ_676	MANIB_2930	99.80	497	1	0	1	497	1	497	0	1024
ESALQ_677	MANIB_2928	98.57	1394	19	1	272	1665	1	1393	0	2804
ESALQ_678	MANIB_2927	97.67	858	20	0	1	858	1	858	0	1635
ESALQ_679	MANIB_2926	99.43	1944	9	1	1	1944	1	1942	0	3695
ESALQ_680	MANIB_2925	100.00	450	0	0	1	450	1	450	0	941
ESALQ_681	MANIB_2924	98.40	374	6	0	31	404	1	374	0	762
ESALQ_682	MANIB_2923	99.70	664	2	0	1	664	163	826	0	1199
ESALQ_683	MANIB_2922	98.82	934	11	0	1	934	1	934	0	1886
ESALQ_684	MANIB_2921	99.64	281	1	0	1	281	1	281	0	582
ESALQ_685	MANIB_2920	95.72	1589	47	2	1	1569	1	1588	0	3088
ESALQ_686	MANIB_2919	99.58	721	3	0	1	721	1	721	0	1493
ESALQ_688	MANIB_2917	99.13	459	4	0	1	459	1	459	0	931
ESALQ_689	MANIB_2916	98.19	609	11	0	1	609	1	609	0	1238
ESALQ_690	MANIB_2915	96.04	1036	38	1	1	1036	1	1033	0	1748
ESALQ_691	MANIB_2914	99.09	439	4	0	1	439	1	439	0	848
ESALQ_692	MANIB_2912	98.03	558	11	0	1	558	1	558	0	1145
ESALQ_695	MANIB_2909	95.19	457	21	1	1	456	1	457	0	861
ESALQ_697	MANIB_2907	99.25	400	3	0	1	400	1	400	0	817
ESALQ_698	MANIB_2906	99.47	755	4	0	1	755	1	755	0	1545
ESALQ_699	MANIB_2905	96.57	379	13	0	1	379	1	379	0	749
ESALQ_700	MANIB_2904	96.76	555	18	0	1	555	1	555	0	1084
ESALQ_701	MANIB_2903	98.93	1955	3	1	1	1955	1	1937	0	4002
ESALQ_702	MANIB_2902	88.13	337	14	2	1	337	1	311	0	588
ESALQ_703	MANIB_2901	99.82	548	1	0	1	548	1	548	0	1117
ESALQ_704	MANIB_2900	92.54	496	2	1	1	496	1	461	0	939
ESALQ_705	MANIB_2899	98.36	609	10	0	1	609	1	609	0	1253
ESALQ_706	MANIB_2898	99.07	540	5	0	1	540	1	540	0	1105
ESALQ_709	MANIB_2895	97.05	407	12	0	1	407	1	407	0	813
ESALQ_710	MANIB_2894	89.82	383	21	2	1	365	1	383	0	698
ESALQ_711	MANIB_2893	99.09	1322	12	0	1	1322	1	1322	0	2707
ESALQ_712	MANIB_2892	99.46	555	3	0	1	555	1	555	0	1157
ESALQ_713	MANIB_2891	92.68	328	24	0	1	328	1	328	0	540
ESALQ_714	MANIB_2890	98.31	295	5	0	1	295	1	295	0	608
ESALQ_715	MANIB_2889	97.54	366	9	0	54	419	1	366	0	732
ESALQ_716	MANIB_2888	97.80	410	9	0	1	410	1	410	0	831
ESALQ_717	MANIB_2887	96.28	376	10	1	31	406	132	503	0	757
ESALQ_719	MANIB_2885	99.72	1070	3	0	1	1070	1	1070	0	2201
ESALQ_720	MANIB_2884	98.99	991	10	0	1	991	1	991	0	2004
ESALQ_721	MANIB_2883	99.61	255	1	0	1	255	1	255	0	523
ESALQ_723	MANIB_2881	96.11	334	9	1	1	334	1	330	0	630
ESALQ_724	MANIB_2880	99.22	641	5	0	1	641	1	641	0	1326
ESALQ_725	MANIB_2879	99.30	570	3	1	1	570	1	569	0	1150
ESALQ_727	MANIB_2877	92.81	445	32	0	1	445	1	445	0	544
ESALQ_729	MANIB_2875	98.64	954	13	0	1	954	1	954	0	1970
ESALQ_730	MANIB_2874	99.55	890	4	0	1	890	1	890	0	1837
ESALQ_731	MANIB_2873	98.23	339	6	0	1	339	1	339	0	697
ESALQ_732	MANIB_2872	91.51	471	4	2	1	454	1	452	0	874
ESALQ_733	MANIB_2871	99.54	1095	5	0	1	1095	1	1095	0	2240
ESALQ_734	MANIB_2870	93.07	721	28	1	1	721	1	699	0	1355
ESALQ_735	MANIB_2869	96.28	564	20	1	1	563	1	564	0	1117
ESALQ_736	MANIB_2868	97.31	335	9	0	15	349	14	348	0	673
ESALQ_737	MANIB_2867	94.88	977	45	2	1	973	1	976	0	1875
ESALQ_738	MANIB_2866	99.16	356	3	0	33	388	5	360	0	732
ESALQ_739	MANIB_2865	98.42	821	13	0	1	821	1	821	0	1669
ESALQ_740	MANIB_2864	98.74	556	7	0	1	556	1	556	0	1144
ESALQ_742	MANIB_2863	95.19	312	14	1	1	312	1	311	0	610
ESALQ_743	MANIB_2862	98.53	340	5	0	1	340	1	340	0	673
ESALQ_744	MANIB_2861	99.53	639	3	0	1	639	1	639	0	1334
ESALQ_745	MANIB_2860	99.27	273	2	0	1	273	1	273	0	558
ESALQ_748	MANIB_2857	98.44	513	5	1	1	513	1	510	0	1040
ESALQ_749	MANIB_2856	99.68	623	2	0	1	623	1	623	0	1301
ESALQ_750	MANIB_2856	97.11	554	16	0	1	554	784	1337	0	1119
ESALQ_751	MANIB_2855	98.11	794	14	1	1	794	1	793	0	1543
ESALQ_752	MANIB_2854	99.70	2030	6	0	1	2030	1	2030	0	4070
ESALQ_754	MANIB_2852	84.77	394	22	1	2	357	147	540	0	656
ESALQ_756	MANIB_2850	97.44	352	9	0	1	352	1	352	0	716
ESALQ_759	MANIB_2847	99.88	862	1	0	1	862	1	862	0	1788
ESALQ_760	MANIB_2846	98.08	260	5	0	1	260	1	260	0	534
ESALQ_761	MANIB_2845	100.00	249	0	0	1	249	1	249	0	507
ESALQ_763	MANIB_2843	98.54	1162	17	0	1	1162	1	1162	0	2371
ESALQ_764	MANIB_2842	93.62	439	28	0	1	439	1	439	0	853
ESALQ_765	MANIB_2841	99.71	1046	3	0	1	1046	1	1046	0	2154
ESALQ_766	MANIB_2840	99.28	279	2	0	1	279	1	279	0	578
ESALQ_767	MANIB_2838	97.15	492	14	0	1	492	1	492	0	971
ESALQ_768	MANIB_2837	97.54	448	11	0	1	448	1	448	0	901
ESALQ_769	MANIB_2836	99.47	947	5	0	1	947	1	947	0	1954
ESALQ_772	MANIB_2833	99.15	352	3	0	1	352	1	352	0	699
ESALQ_773	MANIB_2832	96.28	403	14	1	1	402	1	403	0	649
ESALQ_774	MANIB_2831	98.80	249	3	0	1	249	1	249	0	504
ESALQ_775	MANIB_2830	99.66	874	3	0	1	874	1	874	0	1771
ESALQ_776	MANIB_2829	100.00	251	0	0	1	251	1	251	0	522
ESALQ_777	MANIB_2828	92.96	582	38	1	1	579	1	582	0	993
ESALQ_778	MANIB_2827	96.45	535	18	1	1	534	1	535	0	1047
ESALQ_779	MANIB_2826	99.27	685	4	1	1	685	1	684	0	1399
ESALQ_780	MANIB_2825	98.50	599	9	0	1	599	1	599	0	1226
ESALQ_781	MANIB_2824	95.86	4179	102	4	62	4225	1	4123	0	8267
ESALQ_782	MANIB_2823	97.57	575	14	0	6	580	1	575	0	1159
ESALQ_783	MANIB_2822	99.82	544	1	0	1	544	1	544	0	1131
ESALQ_785	MANIB_2820	100.00	509	0	0	1	509	1	509	0	1049
ESALQ_787	MANIB_2818	94.08	608	5	1	1	577	1	608	0	1174
ESALQ_788	MANIB_2817	99.72	356	1	0	1	356	1	356	0	730
ESALQ_790	MANIB_2815	99.46	1493	8	0	1	1493	1	1493	0	3087
ESALQ_791	MANIB_2814	99.25	805	6	0	1	805	1	805	0	1667
ESALQ_792	MANIB_2813	96.30	378	14	0	1	378	1	378	0	737
ESALQ_793	MANIB_2812	94.78	402	21	0	1	402	1	402	0	754
ESALQ_794	MANIB_2811	99.91	1157	1	0	1	1157	1	1157	0	2409
ESALQ_795	MANIB_2810	83.19	1029	103	8	1	1023	1	965	0	1680
ESALQ_797	MANIB_2741	92.95	681	20	3	1	660	1	674	0	1272
ESALQ_799	MANIB_2742	99.33	297	2	0	1	297	1	297	0	606
ESALQ_801	MANIB_2744	99.82	571	1	0	415	985	281	851	0	1181
ESALQ_803	MANIB_2746	95.04	524	3	1	1	501	1	524	0	1011
ESALQ_805	MANIB_2748	98.58	1972	28	0	1	1972	1	1972	0	3914
ESALQ_806	MANIB_2749	100.00	305	0	0	1	305	1	305	0	617
ESALQ_807	MANIB_2750	98.86	615	7	0	4	618	68	682	0	1221
ESALQ_808	MANIB_2752	99.48	381	2	0	78	458	12	392	0	763
ESALQ_809	MANIB_2753	98.26	862	15	0	1	862	1	862	0	1726
ESALQ_810	MANIB_2754	99.66	296	1	0	1	296	1	296	0	563
ESALQ_811	MANIB_2755	93.14	525	6	2	1	522	1	498	0	909
ESALQ_813	MANIB_2757	100.00	449	0	0	1	449	1	449	0	944
ESALQ_814	MANIB_2758	98.38	370	6	0	1	370	1	370	0	755
ESALQ_815	MANIB_2759	100.00	511	0	0	1	511	1	511	0	1045
ESALQ_816	MANIB_2760	99.88	858	0	1	1	857	1	858	0	1749
ESALQ_817	MANIB_2761	93.11	305	21	0	1	305	1	305	0	554
ESALQ_820	MANIB_2764	99.57	2352	10	0	1	2352	1	2352	0	4822
ESALQ_821	MANIB_2765	97.83	830	18	0	117	946	37	866	0	1680
ESALQ_824	MANIB_2768	99.35	307	2	0	1	307	1	307	0	628
ESALQ_825	MANIB_2770	97.07	956	22	2	1	950	1	956	0	1882
ESALQ_826	MANIB_2771	99.21	509	4	0	1	509	1	509	0	1054
ESALQ_829	MANIB_2775	100.00	799	0	0	1	799	1	799	0	1667
ESALQ_831	MANIB_2777	92.79	638	23	2	65	679	1	638	0	1184
ESALQ_832	MANIB_2778	98.49	991	15	0	1	991	3	993	0	2019
ESALQ_835	MANIB_2780	97.75	267	5	1	1	266	1	267	0	531
ESALQ_836	MANIB_2781	99.73	750	2	0	1	750	1	750	0	1561
ESALQ_837	MANIB_2782	80.82	563	67	5	1	524	68	628	0	881
ESALQ_838	MANIB_2783	94.13	766	35	1	105	870	5	760	0	1461
ESALQ_840	MANIB_2784	99.37	319	2	0	1	319	1	319	0	605
ESALQ_842	MANIB_2785	99.77	432	1	0	1	432	1	432	0	879
ESALQ_844	MANIB_2787	99.43	705	4	0	1	705	1	705	0	1453
ESALQ_845	MANIB_2788	90.51	1012	38	5	1	1012	1	954	0	1852
ESALQ_846	MANIB_2789	100.00	317	0	0	1	317	1	317	0	647
ESALQ_847	MANIB_2790	99.58	472	2	0	1	472	1	472	0	969
ESALQ_848	MANIB_2791	99.71	679	2	0	1	679	1	679	0	1372
ESALQ_849	MANIB_2792	92.79	1012	10	3	1	949	1	1012	0	1869
ESALQ_850	MANIB_2793	97.05	475	14	0	18	492	2	476	0	956
ESALQ_851	MANIB_2794	98.51	537	6	1	1	537	1165	1699	0	1106
ESALQ_852	MANIB_2794	99.28	1116	5	1	1	1116	1	1113	0	2253
ESALQ_853	MANIB_2795	98.95	570	6	0	1	570	1	570	0	1184
ESALQ_854	MANIB_2796	92.42	844	23	4	1	822	1	825	0	1429
ESALQ_855	MANIB_2797	97.71	743	10	1	1	743	1	736	0	1497
ESALQ_856	MANIB_2798	99.81	2111	4	0	1	2111	1	2111	0	4372
ESALQ_857	MANIB_2799	99.71	341	1	0	1	341	1	341	0	676
ESALQ_861	MANIB_2803	91.69	806	51	2	1	806	7	796	0	1476
ESALQ_862	MANIB_2804	99.48	384	2	0	1	384	1	384	0	776
ESALQ_863	MANIB_2805	99.11	1011	9	0	1	1011	1	1011	0	2048
ESALQ_865	MANIB_2740	99.23	517	4	0	1	517	1	517	0	1050
ESALQ_866	MANIB_2739	98.24	397	6	1	1	397	1	396	0	760
ESALQ_868	MANIB_2737	98.23	1414	15	2	1	1413	1	1405	0	2864
ESALQ_869	MANIB_2736	98.87	620	7	0	1	620	1	620	0	1245
ESALQ_870	MANIB_2735	85.74	540	47	4	1	524	1	526	0	896
ESALQ_871	MANIB_2734	99.77	433	1	0	1	433	1	433	0	900
ESALQ_872	MANIB_2733	99.86	691	1	0	1	691	1	691	0	1441
ESALQ_873	MANIB_2732	99.55	446	2	0	1	446	1	446	0	921
ESALQ_874	MANIB_2731	99.72	362	1	0	1	362	1	362	0	755
ESALQ_875	MANIB_2730	98.65	296	4	0	1	296	1	296	0	602
ESALQ_876	MANIB_2729	99.30	429	3	0	1	429	1	429	0	888
ESALQ_877	MANIB_2728	99.60	252	1	0	1	252	1	252	0	508
ESALQ_878	MANIB_2727	99.02	306	3	0	1	306	1	306	0	602
ESALQ_879	MANIB_2726	91.98	374	4	1	1	348	1	374	0	689
ESALQ_881	MANIB_2724	97.68	775	17	1	1	774	1	775	0	1568
ESALQ_882	MANIB_2723	95.35	1290	15	1	1	1290	1	1245	0	2506
ESALQ_884	MANIB_2721	98.78	573	7	0	1	573	1	573	0	1161
ESALQ_885	MANIB_2720	97.64	381	8	1	1	380	1	381	0	773
ESALQ_886	MANIB_2719	94.56	331	18	0	19	349	19	349	0	575
ESALQ_887	MANIB_2717	97.44	273	7	0	402	674	1	273	0	545
ESALQ_890	MANIB_2715	98.80	333	4	0	1	333	1	333	0	679
ESALQ_892	MANIB_2714	97.75	400	8	1	1	400	1	399	0	804
ESALQ_893	MANIB_2713	96.45	704	21	2	1	702	1	702	0	1349
ESALQ_894	MANIB_2712	98.53	749	11	0	1	749	1	749	0	1536
ESALQ_896	MANIB_2710	98.68	379	5	0	1	379	59	437	0	769
ESALQ_897	MANIB_2709	99.72	356	1	0	1	356	1	356	0	738
ESALQ_898	MANIB_2708	99.34	305	2	0	4	308	67	371	0	619
ESALQ_899	MANIB_2707	96.60	470	16	0	1	470	1	470	0	944
ESALQ_901	MANIB_2705	98.58	494	7	0	1	494	1	494	0	968
ESALQ_902	MANIB_2704	99.71	688	2	0	1	688	130	817	0	1409
ESALQ_903	MANIB_2703	89.32	562	9	2	1	514	1	559	0	1030
ESALQ_904	MANIB_2702	97.98	1140	2	1	1	1119	1	1140	0	2300
ESALQ_905	MANIB_2701	98.32	714	12	0	1	714	1	714	0	1454
ESALQ_908	MANIB_2698	99.37	477	2	1	1	476	1	477	0	974
ESALQ_909	MANIB_2697	99.55	672	3	0	1	672	1	672	0	1325
ESALQ_911	MANIB_2695	98.77	406	5	0	1	406	1	406	0	823
ESALQ_912	MANIB_2694	100.00	426	0	0	1	426	1	426	0	834
ESALQ_914	MANIB_2692	99.59	726	3	0	1	726	1	726	0	1486
ESALQ_915	MANIB_2691	95.43	547	25	0	1	547	1	547	0	978
ESALQ_916	MANIB_2690	98.66	299	4	0	1	299	1	299	0	619
ESALQ_917	MANIB_2689	92.33	313	17	1	1	313	1	306	0	571
ESALQ_918	MANIB_2688	97.83	507	0	1	1	496	1	507	0	1019
ESALQ_919	MANIB_2687	99.37	317	2	0	1	317	1	317	0	652
ESALQ_920	MANIB_2685	98.96	479	5	0	350	828	1	479	0	964
ESALQ_921	MANIB_2684	99.40	995	6	0	1	995	1	995	0	2041
ESALQ_923	MANIB_2682	99.54	437	2	0	1	437	1	437	0	903
ESALQ_924	MANIB_2681	94.15	855	33	2	1	855	1	838	0	1598
ESALQ_925	MANIB_2680	100.00	277	0	0	1	277	1	277	0	573
ESALQ_928	MANIB_2676	99.68	943	3	0	1	943	1	943	0	1938
ESALQ_929	MANIB_2675	99.11	449	4	0	1	449	1	449	0	907
ESALQ_930	MANIB_2674	98.97	680	7	0	1	680	1	680	0	1394
ESALQ_931	MANIB_2673	99.19	742	6	0	1	742	1	742	0	1493
ESALQ_932	MANIB_2672	97.86	327	7	0	1	327	1	327	0	664
ESALQ_933	MANIB_2670	95.92	417	17	0	1	417	1	417	0	586
ESALQ_936	MANIB_2669	97.96	686	14	0	1	686	1	686	0	1338
ESALQ_938	MANIB_2667	99.09	662	6	0	1	662	1	662	0	1312
ESALQ_939	MANIB_2666	99.61	258	1	0	24	281	94	351	0	533
ESALQ_940	MANIB_2665	99.68	1252	4	0	1	1252	1	1252	0	2574
ESALQ_941	MANIB_2664	99.30	718	5	0	1	718	1	718	0	1466
ESALQ_943	MANIB_2663	99.48	578	1	1	1	578	1	576	0	1120
ESALQ_945	MANIB_2661	99.48	574	3	0	1	574	1	574	0	1177
ESALQ_947	MANIB_2660	98.94	1412	11	1	1	1408	1	1412	0	2823
ESALQ_948	MANIB_2659	99.01	303	3	0	1	303	1	303	0	614
ESALQ_949	MANIB_2658	99.76	424	1	0	1	424	1	424	0	879
ESALQ_950	MANIB_2657	99.33	601	4	0	1	601	1	601	0	1239
ESALQ_951	MANIB_2656	98.70	1383	14	1	1	1383	1	1379	0	2846
ESALQ_952	MANIB_2655	92.49	519	25	3	1	515	1	509	0	985
ESALQ_953	MANIB_2654	99.75	799	2	0	1	799	1	799	0	1645
ESALQ_955	MANIB_2652	99.09	1100	7	2	1	1097	1	1100	0	2230
ESALQ_956	MANIB_2651	99.46	555	3	0	1	555	1	555	0	1141
ESALQ_957	MANIB_2650	99.68	621	2	0	1	621	85	705	0	1292
ESALQ_958	MANIB_2649	97.35	528	14	0	1	528	1	528	0	1084
ESALQ_959	MANIB_2648	99.14	465	4	0	1	465	1	465	0	951
ESALQ_960	MANIB_2647	99.69	326	1	0	1	326	1	326	0	632
ESALQ_961	MANIB_2646	72.25	699	65	7	1	699	1	570	0	858
ESALQ_962	MANIB_2645	98.77	408	5	0	1	408	1	408	0	821
ESALQ_963	MANIB_2644	99.28	555	4	0	1	555	131	685	0	1133
ESALQ_965	MANIB_2642	99.73	368	1	0	1	368	1	368	0	762
ESALQ_966	MANIB_2641	97.91	431	9	0	1	431	29	459	0	860
ESALQ_967	MANIB_2640	86.59	410	14	1	1	369	1	410	0	691
ESALQ_968	MANIB_2639	98.44	577	9	0	1	577	1	577	0	1166
ESALQ_970	MANIB_2638	99.07	536	5	0	1	536	1	536	0	1107
ESALQ_971	MANIB_2637	91.18	272	22	1	1	272	1	270	0	510
ESALQ_972	MANIB_2636	99.20	250	2	0	114	363	1	250	0	506
ESALQ_973	MANIB_2634	89.33	712	76	0	1	712	1	712	0	1306
ESALQ_974	MANIB_2633	86.27	415	15	2	1	373	1	415	0	714
ESALQ_976	MANIB_2632	97.07	443	12	1	1	443	1	442	0	882
ESALQ_977	MANIB_2631	96.25	587	8	1	1	587	1	573	0	1170
ESALQ_978	MANIB_2630	99.40	498	3	0	1	498	1	498	0	1016
ESALQ_979	MANIB_2629	98.85	522	6	0	1	522	1	522	0	1069
ESALQ_981	MANIB_2627	97.57	1192	27	2	1	1191	1	1191	0	2365
ESALQ_982	MANIB_2626	99.39	488	3	0	1	488	1	488	0	998
ESALQ_984	MANIB_2624	94.97	756	18	1	1	736	1	756	0	1447
ESALQ_985	MANIB_2623	98.19	609	11	0	1	609	1	609	0	1228
ESALQ_986	MANIB_2622	97.96	491	10	0	1	491	1	491	0	990
ESALQ_987	MANIB_2621	97.52	403	10	0	224	626	1	403	0	801
ESALQ_988	MANIB_2619	88.01	559	12	2	1	504	1	559	0	981
ESALQ_989	MANIB_2618	98.29	643	11	0	43	685	5	647	0	1295
ESALQ_990	MANIB_2617	98.02	252	5	0	1	252	1	252	0	500
ESALQ_991	MANIB_2616	89.76	537	42	4	1	535	32	557	0	957
ESALQ_992	MANIB_2615	97.38	724	19	0	1	724	1	724	0	1467
ESALQ_993	MANIB_2614	96.62	385	12	1	1	385	1	384	0	673
ESALQ_994	MANIB_2613	99.72	355	1	0	1	355	1	355	0	727
ESALQ_995	MANIB_2612	100.00	324	0	0	1	324	1	324	0	651
ESALQ_996	MANIB_2611	98.58	281	4	0	1	281	1	281	0	583
ESALQ_997	MANIB_2610	95.28	487	21	1	1	487	90	574	0	953
ESALQ_998	MANIB_2609	97.82	1010	19	2	343	1352	298	1304	0	1933
ESALQ_1000	MANIB_2607	99.06	1589	15	0	1	1589	1	1589	0	3245
ESALQ_1002	MANIB_2605	99.66	591	2	0	1	591	1	591	0	1202
ESALQ_1003	MANIB_2604	98.49	331	5	0	1	331	1	331	0	679
ESALQ_1004	MANIB_2603	98.11	265	5	0	1	265	1	265	0	545
ESALQ_1005	MANIB_2602	97.88	378	8	0	1	378	1	378	0	726
ESALQ_1006	MANIB_2601	96.03	428	15	1	1	426	1	428	0	811
ESALQ_1007	MANIB_2600	87.93	348	26	2	1	335	1	345	0	601
ESALQ_1008	MANIB_2599	94.41	358	20	0	1	358	1	358	0	645
ESALQ_1010	MANIB_2597	97.21	358	8	2	1	356	1	358	0	692
ESALQ_1011	MANIB_2596	98.80	334	4	0	1	334	1	334	0	679
ESALQ_1012	MANIB_2595	96.55	290	10	0	1	290	1	290	0	570
ESALQ_1013	MANIB_2594	92.47	518	6	1	1	485	1	518	0	944
ESALQ_1014	MANIB_2593	96.77	372	10	1	1	370	24	395	0	731
ESALQ_1015	MANIB_2592	99.50	605	3	0	1	605	1	605	0	1183
ESALQ_1016	MANIB_2591	97.02	537	16	0	1	537	1	537	0	1092
ESALQ_1019	MANIB_2588	97.06	545	15	1	1	544	189	733	0	1105
ESALQ_1020	MANIB_2587	95.19	312	13	1	62	373	943	1252	0	594
ESALQ_1021	MANIB_2587	98.80	916	11	0	1	916	1	916	0	1816
ESALQ_1022	MANIB_2586	93.24	370	15	3	1	360	1	370	0	584
ESALQ_1023	MANIB_2585	94.61	297	16	0	1	297	1	297	0	584
ESALQ_1025	MANIB_2583	95.43	328	15	0	1	328	1	328	0	656
ESALQ_1026	MANIB_2581	96.45	366	13	0	1	366	1	366	0	737
ESALQ_1028	MANIB_2580	94.91	432	22	0	1	432	1	432	0	853
ESALQ_1029	MANIB_2579	97.15	281	8	0	1	281	1	281	0	570
ESALQ_1030	MANIB_2578	99.13	808	7	0	1	808	1	808	0	1663
ESALQ_1031	MANIB_2577	97.28	368	9	1	1	368	1	367	0	751
ESALQ_1032	MANIB_2576	95.29	1402	66	0	1	1402	1	1402	0	2748
ESALQ_1033	MANIB_2575	95.59	272	12	0	1	272	1	272	0	531
ESALQ_1034	MANIB_2574	96.62	800	25	1	1	800	1	798	0	1591
ESALQ_1039	MANIB_10429	91.78	304	25	0	1	304	1	304	0	575
ESALQ_1040	MANIB_10430	97.49	358	9	0	1	358	1	358	0	732
ESALQ_1047	MANIB_10432	98.37	306	5	0	1	306	1	306	0	631
ESALQ_1048	MANIB_10433	99.75	399	1	0	1	399	1	399	0	828
ESALQ_1049	MANIB_10434	88.54	288	7	1	1	288	1	262	0	510
ESALQ_1052	MANIB_10436	97.78	315	7	0	1	315	1	315	0	636
ESALQ_1058	MANIB_9283	97.40	308	8	0	1	308	1	308	0	631
ESALQ_1059	MANIB_9282	97.00	267	8	0	1	267	1	267	0	537
ESALQ_1061	MANIB_9281	96.96	296	9	0	1	296	1	296	0	609
ESALQ_1062	MANIB_9280	97.17	353	10	0	1	353	1	353	0	712
ESALQ_1065	MANIB_9278	91.99	562	40	2	1	562	1	557	0	913
ESALQ_1066	MANIB_9277	98.43	1016	15	1	1	1016	1	1015	0	2036
ESALQ_1067	MANIB_9276	98.87	533	6	0	1	533	1	533	0	1086
ESALQ_1068	MANIB_9275	82.69	312	14	1	41	312	48	359	0	518
ESALQ_1069	MANIB_9274	99.57	2588	11	0	1	2588	3	2590	0	5341
ESALQ_1071	MANIB_9272	99.56	454	2	0	1	454	1	454	0	933
ESALQ_1072	MANIB_9271	98.23	395	7	0	1	395	19	413	0	801
ESALQ_1074	MANIB_9269	97.58	703	17	0	1	703	1	703	0	1358
ESALQ_1075	MANIB_9268	91.98	499	25	2	1	499	1	484	0	863
ESALQ_1076	MANIB_9267	100.00	907	0	0	1	907	1	907	0	1848
ESALQ_1077	MANIB_9266	98.57	349	4	1	1	348	1	349	0	704
ESALQ_1078	MANIB_9265	92.13	788	38	2	1	786	1	766	0	1370
ESALQ_1083	MANIB_9262	98.06	258	3	1	88	343	37	294	0	518
ESALQ_1085	MANIB_9260	98.99	297	3	0	1	297	1	297	0	615
ESALQ_1086	MANIB_9259	78.80	368	39	5	1	356	1	341	0	559
ESALQ_1087	MANIB_9258	99.64	275	1	0	1	275	1	275	0	560
ESALQ_1088	MANIB_9257	100.00	384	0	0	1	384	1	384	0	788
ESALQ_1089	MANIB_9256	100.00	364	0	0	1	364	1	364	0	744
ESALQ_1090	MANIB_9255	99.31	291	2	0	20	310	4	294	0	554
ESALQ_1091	MANIB_9254	99.61	519	2	0	1	519	1	519	0	1062
ESALQ_1092	MANIB_9253	98.75	2075	24	1	1	2075	1	2073	0	4232
ESALQ_1093	MANIB_9252	99.51	813	4	0	1	813	1	813	0	1664
ESALQ_1094	MANIB_9251	90.40	354	17	2	1	354	1	337	0	649
ESALQ_1096	MANIB_9248	99.63	543	2	0	1	543	1	543	0	1093
ESALQ_1098	MANIB_9246	99.30	570	4	0	1	570	1	570	0	1181
ESALQ_1100	MANIB_9244	94.60	871	41	1	1	871	1	865	0	1717
ESALQ_1101	MANIB_9243	98.35	486	8	0	1	486	1	486	0	979
ESALQ_1103	MANIB_9242	97.89	568	12	0	1	568	1	568	0	1152
ESALQ_1104	MANIB_9241	93.54	495	5	1	73	567	1	468	0	931
ESALQ_1106	MANIB_9240	97.00	700	6	1	1	700	1	685	0	1407
ESALQ_1107	MANIB_9239	99.42	343	2	0	1	343	1	343	0	708
ESALQ_1108	MANIB_9237	89.32	918	91	3	335	1248	179	1093	0	1669
ESALQ_1109	MANIB_9236	96.56	349	12	0	40	388	1	349	0	701
ESALQ_1110	MANIB_9235	87.67	584	19	3	1	584	1	531	0	1014
ESALQ_1111	MANIB_9234	100.00	472	0	0	1	472	1	472	0	988
ESALQ_1112	MANIB_9233	95.57	406	12	1	1	406	1	400	0	807
ESALQ_1113	MANIB_9232	97.51	321	8	0	1	321	1	321	0	645
ESALQ_1114	MANIB_9231	90.20	1031	47	3	2	978	1	1031	0	1839
ESALQ_1115	MANIB_9229	99.32	1032	7	0	1	1032	1	1032	0	2111
ESALQ_1116	MANIB_9228	98.90	363	4	0	1	363	1	363	0	745
ESALQ_1117	MANIB_9227	99.39	330	2	0	1	330	1	330	0	672
ESALQ_1118	MANIB_9226	99.41	505	3	0	1	505	1	505	0	1028
ESALQ_1119	MANIB_9225	99.26	542	4	0	1	542	1	542	0	1104
ESALQ_1120	MANIB_9224	98.11	792	15	0	1	792	1	792	0	1555
ESALQ_1121	MANIB_9223	93.69	539	24	1	1	539	1	529	0	1015
ESALQ_1122	MANIB_9222	99.67	305	1	0	1	305	1	305	0	617
ESALQ_1124	MANIB_9219	98.48	723	10	1	1	723	1	722	0	1434
ESALQ_1125	MANIB_9218	95.71	606	2	2	1	605	1	583	0	1150
ESALQ_1126	MANIB_9217	99.59	739	3	0	1	739	1	739	0	1522
ESALQ_1127	MANIB_9216	97.61	418	10	0	1	418	1	418	0	842
ESALQ_1128	MANIB_9215	96.01	777	12	1	1	777	1	758	0	1526
ESALQ_1129	MANIB_9214	99.45	546	3	0	1	546	1	546	0	1114
ESALQ_1130	MANIB_9213	98.58	352	5	0	40	391	1	352	0	713
ESALQ_1131	MANIB_9212	98.61	287	4	0	67	353	1	287	0	593
ESALQ_1132	MANIB_9211	98.85	435	3	1	1	435	1	433	0	882
ESALQ_1133	MANIB_9210	99.69	322	0	1	1	322	1	321	0	618
ESALQ_1134	MANIB_9209	99.35	1074	7	0	1	1074	1	1074	0	2226
ESALQ_1135	MANIB_9208	99.70	335	1	0	1	335	1	335	0	689
ESALQ_1137	MANIB_9206	96.37	441	9	1	1	441	1	434	0	866
ESALQ_1138	MANIB_9205	98.96	480	5	0	1	480	1	480	0	974
ESALQ_1139	MANIB_9204	94.81	289	9	2	12	300	272	554	0	551
ESALQ_1140	MANIB_9203	96.83	379	12	0	1	379	1	379	0	756
ESALQ_1141	MANIB_9202	94.68	809	29	1	1	809	1	795	0	1575
ESALQ_1142	MANIB_9201	98.59	495	7	0	1	495	1	495	0	1021
ESALQ_1143	MANIB_9200	98.41	690	11	0	1	690	1	690	0	1403
ESALQ_1144	MANIB_9199	98.21	335	6	0	1	335	1	335	0	682
ESALQ_1146	MANIB_9197	97.23	902	21	1	1	898	1	902	0	1804
ESALQ_1147	MANIB_9196	96.71	517	17	0	1	517	1	517	0	1035
ESALQ_1148	MANIB_9195	100.00	562	0	0	1	562	1	562	0	1184
ESALQ_1149	MANIB_9194	99.66	292	1	0	1	292	1	292	0	600
ESALQ_1150	MANIB_9193	98.60	358	5	0	1	358	1	358	0	736
ESALQ_1151	MANIB_9192	98.39	744	12	0	1	744	1	744	0	1516
ESALQ_1152	MANIB_9191	99.52	417	2	0	1	417	1	417	0	834
ESALQ_1153	MANIB_9190	94.66	543	29	0	1	543	1	543	0	813
ESALQ_1154	MANIB_9189	99.18	488	4	0	1	488	1	488	0	984
ESALQ_1156	MANIB_9188	100.00	300	0	0	1	300	1	300	0	588
ESALQ_1157	MANIB_9187	99.03	621	6	0	1	621	1	621	0	1261
ESALQ_1159	MANIB_9185	98.18	659	12	0	1	659	1	659	0	1329
ESALQ_1160	MANIB_9184	99.47	380	2	0	1	380	1	380	0	752
ESALQ_1163	MANIB_9181	91.24	548	44	1	1	544	1	548	0	1020
ESALQ_1164	MANIB_9180	99.46	738	4	0	1	738	1	738	0	1484
ESALQ_1165	MANIB_9179	99.21	380	3	0	1	380	1	380	0	746
ESALQ_1167	MANIB_9176	93.90	1394	85	0	552	1945	1	1394	0	2628
ESALQ_1168	MANIB_3697	99.30	431	3	0	1	431	1	431	0	882
ESALQ_1169	MANIB_3698	98.04	255	5	0	1	255	1	255	0	520
ESALQ_1170	MANIB_3699	98.75	321	4	0	1	321	1	321	0	628
ESALQ_1171	MANIB_3700	92.54	295	11	2	1	284	1	295	0	558
ESALQ_1172	MANIB_3701	95.48	487	19	2	1	486	115	599	0	920
ESALQ_1174	MANIB_3703	98.81	504	5	1	1	504	1	503	0	1041
ESALQ_1176	MANIB_3705	97.14	595	17	0	1	595	1	595	0	1167
ESALQ_1177	MANIB_3706	93.63	424	14	1	1	424	1	411	0	806
ESALQ_1178	MANIB_3707	97.34	751	18	1	567	1315	1	751	0	1498
ESALQ_1180	MANIB_3709	99.14	466	4	0	1	466	1	466	0	936
ESALQ_1181	MANIB_3710	99.01	506	5	0	1	506	1	506	0	1036
ESALQ_1182	MANIB_3711	99.49	977	5	0	1	977	1	977	0	2009
ESALQ_1185	MANIB_3714	99.72	351	1	0	1	351	1	351	0	703
ESALQ_1186	MANIB_3715	94.54	623	34	0	1	623	1	623	0	1053
ESALQ_1187	MANIB_3716	98.77	326	4	0	1	326	1	326	0	661
ESALQ_1188	MANIB_3717	96.42	530	19	0	1	530	1	530	0	1051
ESALQ_1190	MANIB_3719	98.30	528	9	0	1	528	1	528	0	1070
ESALQ_1191	MANIB_3720	95.50	378	17	0	1	378	1	378	0	761
ESALQ_1192	MANIB_3721	99.05	423	4	0	1	423	1	423	0	867
ESALQ_1193	MANIB_3722	98.76	322	4	0	1	322	1	322	0	651
ESALQ_1194	MANIB_3723	99.82	549	1	0	1	549	1	549	0	1137
ESALQ_1197	MANIB_3726	97.45	550	14	0	1	550	1	550	0	1095
ESALQ_1198	MANIB_3727	97.81	503	11	0	1	503	1	503	0	1019
ESALQ_1199	MANIB_3728	99.38	322	2	0	1	322	1	322	0	659
ESALQ_1200	MANIB_3729	98.46	714	11	0	1	714	1	714	0	1450
ESALQ_1201	MANIB_3730	97.73	309	7	0	1	309	1	309	0	612
ESALQ_1202	MANIB_3731	99.21	508	4	0	65	572	1	508	0	1052
ESALQ_1203	MANIB_3732	95.28	868	14	2	1	841	1	868	0	1679
ESALQ_1204	MANIB_3733	100.00	473	0	0	1	473	1	473	0	968
ESALQ_1205	MANIB_3734	97.66	384	9	0	1	384	1	384	0	772
ESALQ_1207	MANIB_3736	98.92	1391	15	0	1	1391	1	1391	0	2818
ESALQ_1208	MANIB_3737	98.86	439	5	0	1	439	1	439	0	902
ESALQ_1209	MANIB_3738	97.87	704	15	0	1	704	1	704	0	1430
ESALQ_1210	MANIB_3739	99.68	624	2	0	1	624	1	624	0	1281
ESALQ_1212	MANIB_3741	96.72	702	18	1	1	697	1	702	0	1335
ESALQ_1213	MANIB_3742	98.52	946	14	0	1	946	1	946	0	1863
ESALQ_1214	MANIB_3743	99.77	433	1	0	1	433	1	433	0	907
ESALQ_1216	MANIB_3745	91.69	337	1	1	1	337	1	310	0	620
ESALQ_1217	MANIB_3746	99.27	545	3	1	1	544	1	545	0	1117
ESALQ_1218	MANIB_3747	99.01	912	9	0	1	912	1	912	0	1860
ESALQ_1219	MANIB_3748	99.81	526	1	0	1	526	1	526	0	1077
ESALQ_1220	MANIB_3749	83.38	331	24	3	1	327	1	304	0	506
ESALQ_1221	MANIB_3750	100.00	711	0	0	1	711	1	711	0	1475
ESALQ_1222	MANIB_3751	99.11	1120	10	0	1	1120	1	1120	0	2269
ESALQ_1223	MANIB_3752	99.42	347	2	0	1	347	1	347	0	716
ESALQ_1226	MANIB_3755	99.85	666	1	0	1	666	984	1649	0	1395
ESALQ_1227	MANIB_3755	99.15	945	7	1	1	944	1	945	0	1916
ESALQ_1229	MANIB_3757	98.90	365	4	0	1	365	1	365	0	709
ESALQ_1230	MANIB_3758	99.49	594	3	0	1	594	1	594	0	1205
ESALQ_1231	MANIB_3759	99.46	1291	7	0	1	1291	1	1291	0	2582
ESALQ_1232	MANIB_3760	99.58	478	2	0	1	478	1	478	0	990
ESALQ_1234	MANIB_3762	97.33	599	5	1	1	588	1	599	0	1168
ESALQ_1235	MANIB_3763	99.73	371	1	0	1	371	1	371	0	773
ESALQ_1237	MANIB_3764	98.93	561	6	0	1	561	352	912	0	1161
ESALQ_1239	MANIB_3766	99.52	628	3	0	1	628	1	628	0	1255
ESALQ_1240	MANIB_3767	97.28	993	27	0	1	993	1	993	0	2006
ESALQ_1241	MANIB_3768	88.19	398	7	1	1	358	1	398	0	701
ESALQ_1242	MANIB_3769	98.45	772	1	1	1	761	1	772	0	1565
ESALQ_1243	MANIB_3770	97.30	408	11	0	27	434	23	430	0	799
ESALQ_1245	MANIB_3772	95.42	371	17	0	1	371	1	371	0	682
ESALQ_1246	MANIB_3773	99.52	1260	3	1	1	1257	1	1260	0	2546
ESALQ_1247	MANIB_3774	98.34	541	7	1	1	539	1	541	0	1067
ESALQ_1249	MANIB_3776	98.66	596	8	0	1	596	1	596	0	1201
ESALQ_1251	MANIB_3778	99.50	597	2	1	1	596	1	597	0	1221
ESALQ_1252	MANIB_3779	98.09	1149	22	0	1	1149	1	1149	0	2302
ESALQ_1254	MANIB_3780	95.03	362	6	1	1	362	1	350	0	697
ESALQ_1255	MANIB_3781	99.46	367	2	0	1	367	1	367	0	763
ESALQ_1258	MANIB_3784	92.73	344	25	0	1	344	1	344	0	659
ESALQ_1259	MANIB_3785	96.04	733	29	0	1	733	1	733	0	1450
ESALQ_1260	MANIB_3796	98.83	342	4	0	1	342	1	342	0	699
ESALQ_1261	MANIB_3795	98.14	537	9	1	1	537	1	536	0	1060
ESALQ_1262	MANIB_3794	97.59	291	7	0	1	291	1	291	0	585
ESALQ_1263	MANIB_3793	99.60	252	1	0	162	413	58	309	0	517
ESALQ_1265	MANIB_3791	94.59	333	16	1	1	333	1	331	0	637
ESALQ_1266	MANIB_3790	98.21	447	8	0	1	447	1	447	0	875
ESALQ_1267	MANIB_3789	92.88	337	24	0	1	337	1	337	0	653
ESALQ_1269	MANIB_3787	93.41	1320	62	1	477	1771	1	1320	0	2567
ESALQ_1270	MANIB_3797	99.67	614	2	0	1	614	1	614	0	1271
ESALQ_1271	MANIB_3798	99.82	561	1	0	1	561	1	561	0	1137
ESALQ_1272	MANIB_3799	97.49	637	16	0	170	806	1	637	0	1257
ESALQ_1273	MANIB_3800	97.06	680	20	0	1	680	1	680	0	1353
ESALQ_1274	MANIB_3801	99.09	439	4	0	1	439	1	439	0	872
ESALQ_1275	MANIB_3802	99.73	728	2	0	1	728	138	865	0	1519
ESALQ_1276	MANIB_3803	99.14	347	3	0	1	347	1	347	0	706
ESALQ_1277	MANIB_3805	99.72	354	1	0	1	354	1	354	0	734
ESALQ_1278	MANIB_3806	98.47	458	7	0	1	458	1	458	0	943
ESALQ_1279	MANIB_3807	99.45	1447	8	0	1	1447	1	1447	0	2964
ESALQ_1281	MANIB_3808	98.95	285	3	0	1	285	1	285	0	562
ESALQ_1282	MANIB_3809	99.37	318	2	0	1	318	1	318	0	644
ESALQ_1283	MANIB_3810	99.12	1139	10	0	1	1139	1	1139	0	2258
ESALQ_1284	MANIB_3811	96.73	612	9	1	1	612	1	601	0	1177
ESALQ_1285	MANIB_3812	99.34	905	6	0	1	905	1	905	0	1844
ESALQ_1286	MANIB_3813	96.63	356	12	0	1	356	1	356	0	704
ESALQ_1289	MANIB_3816	98.53	545	8	0	1	545	1	545	0	1117
ESALQ_1290	MANIB_3817	100.00	473	0	0	1	473	1	473	0	962
ESALQ_1291	MANIB_3818	99.86	710	1	0	1	710	1	710	0	1487
ESALQ_1292	MANIB_3819	99.02	409	4	0	1	409	1	409	0	788
ESALQ_1293	MANIB_3820	98.33	539	9	0	1	539	1	539	0	1077
ESALQ_1294	MANIB_3821	100.00	344	0	0	1	344	1	344	0	707
ESALQ_1296	MANIB_3823	99.16	1307	11	0	1	1307	1	1307	0	2632
ESALQ_1297	MANIB_3824	99.48	387	2	0	1	387	1	387	0	804
ESALQ_1298	MANIB_3825	100.00	502	0	0	1	502	1	502	0	1045
ESALQ_1299	MANIB_3826	99.60	1247	5	0	1	1247	1	1247	0	2573
ESALQ_1300	MANIB_3827	99.28	828	4	1	31	858	1	826	0	1662
ESALQ_1302	MANIB_3829	99.68	312	1	0	1	312	86	397	0	625
ESALQ_1303	MANIB_3830	99.67	604	2	0	1	604	1	604	0	1243
ESALQ_1304	MANIB_3831	95.81	1050	42	1	1	1048	1	1050	0	1909
ESALQ_1305	MANIB_3832	90.66	482	9	2	1	482	1	446	0	890
ESALQ_1306	MANIB_3833	99.23	261	2	0	1	261	1	261	0	525
ESALQ_1307	MANIB_3834	98.98	783	6	1	1	783	1	781	0	1528
ESALQ_1308	MANIB_3836	99.09	880	8	0	1	880	1	880	0	1773
ESALQ_1309	MANIB_3837	99.73	746	2	0	1	746	1	746	0	1536
ESALQ_1310	MANIB_3838	99.81	529	1	0	1	529	1	529	0	1062
ESALQ_1311	MANIB_3839	99.58	713	3	0	1	713	1	713	0	1430
ESALQ_1312	MANIB_3840	99.74	384	1	0	1	384	1	384	0	790
ESALQ_1313	MANIB_3841	99.79	478	1	0	1	478	1	478	0	991
ESALQ_1314	MANIB_3842	98.23	396	4	2	1	395	1	394	0	799
ESALQ_1315	MANIB_3843	99.81	527	1	0	1	527	1	527	0	1092
ESALQ_1316	MANIB_3844	98.09	839	16	0	1	839	1	839	0	1707
ESALQ_1317	MANIB_3845	99.73	1094	3	0	1	1094	1	1094	0	2235
ESALQ_1320	MANIB_3847	97.87	328	7	0	22	349	1	328	0	664
ESALQ_1321	MANIB_3848	69.47	416	63	3	1	389	1	379	0	533
ESALQ_1323	MANIB_3850	98.40	501	7	1	1	500	1	501	0	1005
ESALQ_1324	MANIB_3851	98.08	313	6	0	1	313	1	313	0	638
ESALQ_1325	MANIB_5793	84.05	514	60	2	1	514	204	695	0	876
ESALQ_1326	MANIB_3852	95.42	437	20	0	1	437	1	437	0	863
ESALQ_1327	MANIB_3853	99.43	350	2	0	1	350	1	350	0	686
ESALQ_1328	MANIB_3854	97.25	510	14	0	10	519	99	608	0	1014
ESALQ_1330	MANIB_3856	98.73	1659	21	0	1	1659	1	1659	0	3403
ESALQ_1331	MANIB_3857	98.67	525	7	0	1	525	1	525	0	1041
ESALQ_1332	MANIB_3858	94.20	379	22	0	1	379	1	379	0	721
ESALQ_1333	MANIB_3859	95.02	623	31	0	1	623	1	623	0	1226
ESALQ_1335	MANIB_3861	96.66	1018	10	1	1	994	1	1018	0	2025
ESALQ_1336	MANIB_3862	100.00	365	0	0	1	365	1	365	0	758
ESALQ_1338	MANIB_3864	99.71	689	2	0	301	989	1	689	0	1342
ESALQ_1339	MANIB_3865	99.13	1731	11	1	1	1727	1	1731	0	3499
ESALQ_1341	MANIB_3867	99.11	1238	11	0	1	1238	1	1238	0	2539
ESALQ_1343	MANIB_3869	97.51	723	18	0	1	723	1	723	0	1467
ESALQ_1344	MANIB_3870	99.83	606	1	0	1	606	1	606	0	1243
ESALQ_1345	MANIB_3871	99.68	313	1	0	1	313	1	313	0	643
ESALQ_1346	MANIB_3872	99.06	635	6	0	1	635	1	635	0	1285
ESALQ_1347	MANIB_3873	99.61	514	2	0	1	514	1	514	0	1064
ESALQ_1348	MANIB_3874	99.82	562	1	0	1	562	1	562	0	1173
ESALQ_1349	MANIB_3875	99.69	327	1	0	1	327	1	327	0	681
ESALQ_1350	MANIB_3876	98.45	515	8	0	1	515	1	515	0	1054
ESALQ_1351	MANIB_3877	98.21	2628	45	1	1	2626	1	2628	0	5339
ESALQ_1352	MANIB_3878	99.78	451	1	0	1	451	1	451	0	906
ESALQ_1354	MANIB_3880	99.39	495	3	0	1	495	1	495	0	1004
ESALQ_1355	MANIB_3881	95.04	625	29	1	6	630	1	623	0	1236
ESALQ_1356	MANIB_3882	99.07	535	4	1	1	534	1	535	0	1083
ESALQ_1359	MANIB_3884	98.05	512	10	0	1	512	1	512	0	1036
ESALQ_1360	MANIB_3885	99.46	930	5	0	1	930	1	930	0	1928
ESALQ_1361	MANIB_3886	98.50	399	6	0	1	399	1	399	0	807
ESALQ_1365	MANIB_3890	100.00	515	0	0	1	515	1	515	0	1063
ESALQ_1366	MANIB_3891	98.74	317	4	0	1	317	1	317	0	658
ESALQ_1367	MANIB_3892	97.45	823	10	1	1	812	1	823	0	1650
ESALQ_1368	MANIB_3893	97.86	327	7	0	1	327	1	327	0	668
ESALQ_1370	MANIB_3895	97.14	350	10	0	1	350	1	350	0	711
ESALQ_1372	MANIB_3897	100.00	544	0	0	1	544	1	544	0	1107
ESALQ_1373	MANIB_3898	98.76	726	9	0	1	726	1	726	0	1490
ESALQ_1374	MANIB_3899	99.19	863	7	0	1	863	1	863	0	1783
ESALQ_1375	MANIB_3900	98.84	1122	12	1	1	1121	1	1122	0	2237
ESALQ_1379	MANIB_3904	90.92	661	19	4	1	658	1	623	0	1202
ESALQ_1380	MANIB_3905	96.55	637	22	0	1	637	1	637	0	1290
ESALQ_1381	MANIB_3906	97.83	415	9	0	1	415	1	415	0	850
ESALQ_1382	MANIB_3907	98.31	355	6	0	1	355	1	355	0	699
ESALQ_1383	MANIB_3908	97.24	580	16	0	1	580	1	580	0	1167
ESALQ_1384	MANIB_3909	97.13	522	15	0	114	635	65	586	0	1057
ESALQ_1386	MANIB_3910	96.54	347	10	1	1	347	1	345	0	673
ESALQ_1387	MANIB_3911	99.45	541	3	0	1	541	1	541	0	1111
ESALQ_1388	MANIB_3912	99.33	599	4	0	1	599	1	599	0	1248
ESALQ_1390	MANIB_3914	88.33	737	57	5	1	708	1	737	0	1295
ESALQ_1391	MANIB_3916	98.96	866	7	1	1	866	1	864	0	1709
ESALQ_1392	MANIB_3917	99.69	324	1	0	1	324	1	324	0	675
ESALQ_1393	MANIB_3918	97.35	791	4	1	1	791	1	774	0	1593
ESALQ_1394	MANIB_3919	97.91	573	12	0	1	573	1	573	0	1130
ESALQ_1395	MANIB_3920	96.59	381	13	0	1	381	1	381	0	746
ESALQ_1398	MANIB_1693	100.00	804	0	0	1	804	1	804	0	1663
ESALQ_1399	MANIB_1692	99.78	919	2	0	1	919	1	919	0	1894
ESALQ_1400	MANIB_1691	99.70	333	1	0	145	477	1	333	0	683
ESALQ_1403	MANIB_1688	99.89	901	1	0	1	901	1	901	0	1860
ESALQ_1404	MANIB_1687	99.79	471	1	0	1	471	1	471	0	959
ESALQ_1405	MANIB_1686	99.58	713	3	0	1	713	1	713	0	1446
ESALQ_1406	MANIB_1685	99.60	1010	4	0	1	1010	1	1010	0	2076
ESALQ_1407	MANIB_1684	86.35	608	83	0	1	608	1	608	0	1097
ESALQ_1408	MANIB_1683	97.70	305	7	0	736	1040	1	305	0	633
ESALQ_1410	MANIB_1681	99.07	323	3	0	1	323	1	323	0	632
ESALQ_1413	MANIB_1679	97.21	466	12	1	1	465	303	768	0	947
ESALQ_1416	MANIB_1677	100.00	368	0	0	1	368	1	368	0	760
ESALQ_1417	MANIB_1676	99.52	418	2	0	1	418	1	418	0	859
ESALQ_1418	MANIB_1675	99.66	597	2	0	1	597	1	597	0	1221
ESALQ_1419	MANIB_1674	98.95	287	3	0	1	287	1	287	0	580
ESALQ_1420	MANIB_1673	97.18	284	1	1	1	277	1	284	0	560
ESALQ_1421	MANIB_1672	99.44	356	2	0	1	356	1	356	0	729
ESALQ_1422	MANIB_1671	99.03	720	7	0	1	720	1	720	0	1493
ESALQ_1423	MANIB_1670	100.00	656	0	0	1	656	1	656	0	1356
ESALQ_1424	MANIB_1669	98.07	466	7	2	1	466	1	464	0	922
ESALQ_1425	MANIB_1668	99.40	502	3	0	1	502	1	502	0	1017
ESALQ_1426	MANIB_1667	97.95	342	7	0	1	342	1	342	0	701
ESALQ_1427	MANIB_1666	95.62	320	14	0	1	320	1	320	0	622
ESALQ_1428	MANIB_1665	94.06	303	18	0	4	306	13	315	0	561
ESALQ_1429	MANIB_1664	74.20	1535	265	13	1	1522	1	1417	0	2200
ESALQ_1430	MANIB_1663	94.79	614	15	1	1	614	1	597	0	1212
ESALQ_1433	MANIB_1661	93.31	284	4	1	1	284	1	269	0	538
ESALQ_1434	MANIB_1660	99.06	426	4	0	1	426	1	426	0	866
ESALQ_1435	MANIB_1659	91.27	561	3	2	1	561	1	515	0	933
ESALQ_1436	MANIB_1658	99.72	356	1	0	1	356	1	356	0	722
ESALQ_1437	MANIB_1657	95.36	280	13	0	1	280	1	280	0	520
ESALQ_1438	MANIB_1656	99.30	575	4	0	1	575	1	575	0	1167
ESALQ_1439	MANIB_1655	99.09	551	5	0	1	551	1	551	0	1135
ESALQ_1440	MANIB_1654	98.04	306	6	0	1	306	1	306	0	614
ESALQ_1441	MANIB_1653	95.79	546	23	0	1	546	1	546	0	834
ESALQ_1442	MANIB_1652	99.78	457	1	0	175	631	1	457	0	952
ESALQ_1443	MANIB_1651	99.61	258	1	0	1	258	1	258	0	511
ESALQ_1444	MANIB_1650	78.34	397	68	2	1	379	1	397	0	600
ESALQ_1445	MANIB_1649	96.69	363	12	0	1	363	1	363	0	692
ESALQ_1446	MANIB_1648	99.50	601	3	0	1	601	1	601	0	1236
ESALQ_1447	MANIB_1647	98.87	885	10	0	1	885	1	885	0	1793
ESALQ_1448	MANIB_1646	97.55	736	14	2	1	735	1	733	0	1388
ESALQ_1449	MANIB_1645	98.97	1167	11	1	1	1166	1	1167	0	2369
ESALQ_1450	MANIB_1644	99.39	326	2	0	1	326	1	326	0	667
ESALQ_1451	MANIB_1643	99.22	640	3	1	1	640	1	638	0	1213
ESALQ_1452	MANIB_1642	99.38	324	2	0	1	324	1	324	0	676
ESALQ_1453	MANIB_1641	98.85	348	2	1	56	403	30	375	0	655
ESALQ_1454	MANIB_1640	98.92	558	3	1	1	555	1	558	0	1122
ESALQ_1455	MANIB_1639	99.21	506	4	0	1	506	1	506	0	1022
ESALQ_1456	MANIB_1638	99.83	1208	2	0	1	1208	1	1208	0	2518
ESALQ_1457	MANIB_1637	98.97	292	1	1	73	364	1	290	0	555
ESALQ_1458	MANIB_1636	96.04	556	19	1	1	556	1	553	0	975
ESALQ_1460	MANIB_1634	99.17	363	3	0	1	363	1	363	0	698
ESALQ_1462	MANIB_1632	99.19	492	4	0	1	492	1	492	0	1004
ESALQ_1463	MANIB_1631	100.00	595	0	0	1	595	1	595	0	1246
ESALQ_1464	MANIB_1630	96.07	662	26	0	1	662	1	662	0	1307
ESALQ_1465	MANIB_1629	99.88	844	1	0	1	844	1	844	0	1732
ESALQ_1466	MANIB_1628	96.59	3229	55	4	1	3174	1	3229	0	6240
ESALQ_1467	MANIB_1627	99.65	573	2	0	1	573	1	573	0	1164
ESALQ_1468	MANIB_1626	98.87	796	9	0	1	796	1	796	0	1624
ESALQ_1469	MANIB_1625	97.55	1307	24	1	1	1299	1	1307	0	2654
ESALQ_1470	MANIB_1624	97.73	1059	4	1	1	1039	1	1059	0	2106
ESALQ_1471	MANIB_1623	100.00	381	0	0	1	381	1	381	0	780
ESALQ_1472	MANIB_1622	95.63	366	16	0	1	366	1	366	0	723
ESALQ_1473	MANIB_1621	96.71	304	10	0	1	304	1	304	0	596
ESALQ_1476	MANIB_1618	98.33	419	7	0	1	419	1	419	0	857
ESALQ_1477	MANIB_1617	98.22	1009	18	0	1	1009	29	1037	0	2023
ESALQ_1478	MANIB_1616	99.07	537	3	1	1	537	1	535	0	1097
ESALQ_1480	MANIB_1614	99.22	645	5	0	1	645	1	645	0	1322
ESALQ_1482	MANIB_1612	96.79	343	11	0	1	343	1	343	0	684
ESALQ_1483	MANIB_1610	97.62	505	12	0	1	505	1	505	0	1026
ESALQ_1485	MANIB_1608	98.25	342	6	0	1	342	1	342	0	697
ESALQ_1486	MANIB_1607	94.59	259	9	1	1	259	1	254	0	505
ESALQ_1488	MANIB_1606	98.48	396	6	0	35	430	65	460	0	785
ESALQ_1489	MANIB_1605	99.20	377	3	0	1	377	53	429	0	783
ESALQ_1490	MANIB_6633	64.94	462	160	2	1	461	140	600	0	625
ESALQ_1492	MANIB_1602	98.61	432	6	0	1	432	1	432	0	882
ESALQ_1493	MANIB_1601	98.96	386	4	0	1	386	1	386	0	784
ESALQ_1494	MANIB_1600	97.78	1534	34	0	1	1534	1	1534	0	3079
ESALQ_1496	MANIB_1598	99.32	584	4	0	1	584	1	584	0	1203
ESALQ_1502	MANIB_1593	83.19	351	23	1	1	315	43	393	0	583
ESALQ_1504	MANIB_1591	97.83	414	9	0	1	414	1	414	0	823
ESALQ_1505	MANIB_1590	92.72	371	27	0	1	371	1	371	0	689
ESALQ_1507	MANIB_1588	98.62	579	8	0	1	579	1	579	0	1177
ESALQ_1508	MANIB_1586	99.30	570	4	0	1	570	1	570	0	1151
ESALQ_1509	MANIB_1585	99.58	475	2	0	1	475	1	475	0	980
ESALQ_1511	MANIB_1583	100.00	291	0	0	1	291	1	291	0	595
ESALQ_1512	MANIB_1582	99.80	1000	2	0	1	1000	1	1000	0	2055
ESALQ_1513	MANIB_1579	98.30	412	7	0	421	832	1	412	0	829
ESALQ_1514	MANIB_1578	100.00	491	0	0	1	491	1	491	0	1022
ESALQ_1515	MANIB_1577	99.59	734	3	0	1	734	1	734	0	1505
ESALQ_1516	MANIB_1576	96.39	499	18	0	1	499	1	499	0	985
ESALQ_1517	MANIB_1574	98.62	868	12	0	1	868	1	868	0	1773
ESALQ_1518	MANIB_1573	99.58	1442	6	0	1	1442	1	1442	0	2969
ESALQ_1519	MANIB_1572	99.44	357	2	0	1	357	1	357	0	741
ESALQ_1521	MANIB_1570	98.65	666	9	0	1	666	1	666	0	1317
ESALQ_1523	MANIB_1568	87.94	373	25	2	1	372	1	354	0	629
ESALQ_1524	MANIB_1567	96.74	798	26	0	30	827	4	801	0	1586
ESALQ_1527	MANIB_1564	99.67	1535	4	1	1	1534	1	1535	0	3175
ESALQ_1528	MANIB_1563	99.50	400	2	0	1	400	1	400	0	820
ESALQ_1530	MANIB_1561	100.00	528	0	0	1	528	23	550	0	1096
ESALQ_1531	MANIB_1560	98.55	484	7	0	1	484	1	484	0	984
ESALQ_1532	MANIB_1559	99.50	402	2	0	1	402	1	402	0	824
ESALQ_1533	MANIB_1558	98.09	262	5	0	1	262	1	262	0	520
ESALQ_1536	MANIB_1555	97.96	589	8	1	1	589	1	585	0	1190
ESALQ_1537	MANIB_1554	99.17	360	3	0	1	360	1	360	0	745
ESALQ_1538	MANIB_1553	99.07	646	6	0	1	646	1	646	0	1324
ESALQ_1539	MANIB_1553	98.73	632	8	0	1	632	729	1360	0	1244
ESALQ_1540	MANIB_1552	95.28	360	9	2	1	358	1	354	0	673
ESALQ_1541	MANIB_1551	97.95	438	9	0	1	438	92	529	0	887
ESALQ_1543	MANIB_1549	99.84	1859	3	0	1	1859	1	1859	0	3804
ESALQ_1544	MANIB_1548	99.72	2110	6	0	1	2110	1	2110	0	4365
ESALQ_1545	MANIB_1547	97.90	476	10	0	1	476	1	476	0	968
ESALQ_1546	MANIB_1546	98.94	378	4	0	1	378	1	378	0	743
ESALQ_1547	MANIB_1545	98.72	860	10	1	117	975	91	950	0	1750
ESALQ_1549	MANIB_1543	99.78	896	2	0	1	896	1	896	0	1876
ESALQ_1550	MANIB_1542	98.57	489	7	0	1	489	1	489	0	962
ESALQ_1551	MANIB_1541	98.70	926	12	0	1	926	1	926	0	1895
ESALQ_1552	MANIB_1540	93.60	500	2	1	1	470	1	500	0	961
ESALQ_1553	MANIB_1539	98.66	971	4	1	1	971	1	962	0	1956
ESALQ_1554	MANIB_1538	99.89	878	1	0	1	878	1	878	0	1840
ESALQ_1556	MANIB_1536	98.62	436	6	0	1	436	1	436	0	887
ESALQ_1557	MANIB_1535	100.00	423	0	0	1	423	1	423	0	870
ESALQ_1558	MANIB_1534	100.00	913	0	0	1	913	1	913	0	1899
ESALQ_1559	MANIB_1533	96.79	1091	3	1	1	1091	1	1059	0	2186
ESALQ_1560	MANIB_1532	99.62	532	2	0	1	532	1	532	0	1083
ESALQ_1562	MANIB_1530	98.98	392	4	0	1	392	1	392	0	791
ESALQ_1563	MANIB_1529	99.12	800	7	0	1	800	1	800	0	1596
ESALQ_1564	MANIB_1528	93.38	393	20	2	1	388	1	392	0	642
ESALQ_1565	MANIB_1527	98.51	604	8	1	16	618	1	604	0	1206
ESALQ_1566	MANIB_1526	99.66	297	1	0	1	297	1	297	0	611
ESALQ_1568	MANIB_1524	98.41	504	8	0	1	504	1	504	0	1041
ESALQ_1569	MANIB_1523	96.42	307	9	1	93	399	169	473	0	555
ESALQ_1570	MANIB_1522	99.03	1138	11	0	1	1138	1	1138	0	2330
ESALQ_1571	MANIB_1521	100.00	1858	0	0	1	1858	1	1858	0	3835
ESALQ_1572	MANIB_1520	100.00	1784	0	0	1	1784	1	1784	0	3722
ESALQ_1573	MANIB_1519	87.66	478	9	1	58	535	1	428	0	837
ESALQ_1574	MANIB_1518	99.81	536	1	0	1	536	1	536	0	1124
ESALQ_1576	MANIB_1517	100.00	286	0	0	1	286	1	286	0	572
ESALQ_1577	MANIB_1516	99.77	438	1	0	1	438	71	508	0	909
ESALQ_1579	MANIB_1514	98.66	674	9	0	1	674	1	674	0	1369
ESALQ_1580	MANIB_1513	98.60	430	6	0	1	430	1	430	0	872
ESALQ_1581	MANIB_1512	98.81	1340	16	0	1	1340	1	1340	0	2716
ESALQ_1582	MANIB_1511	96.76	1079	35	0	1	1079	1	1079	0	1795
ESALQ_1583	MANIB_1510	99.86	722	1	0	1	722	1	722	0	1474
ESALQ_1584	MANIB_1509	99.84	636	1	0	1	636	1	636	0	1330
ESALQ_1585	MANIB_1508	99.37	1103	7	0	1	1103	1	1103	0	2252
ESALQ_1586	MANIB_1507	98.99	892	9	0	1	892	1	892	0	1836
ESALQ_1587	MANIB_1506	99.49	1752	9	0	118	1869	1	1752	0	3579
ESALQ_1588	MANIB_1505	97.00	666	17	2	1	663	1	666	0	1321
ESALQ_1589	MANIB_1504	100.00	304	0	0	1	304	1	304	0	621
ESALQ_1590	MANIB_1503	99.02	307	3	0	1	307	1	307	0	622
ESALQ_1592	MANIB_1502	99.51	611	3	0	1	611	1	611	0	1229
ESALQ_1593	MANIB_1501	100.00	893	0	0	1	893	1	893	0	1866
ESALQ_1594	MANIB_1500	99.69	647	2	0	1	647	1	647	0	1331
ESALQ_1595	MANIB_1499	99.14	347	3	0	1	347	33	379	0	712
ESALQ_1596	MANIB_1498	98.79	413	5	0	1	413	1	413	0	841
ESALQ_1597	MANIB_1497	99.78	448	1	0	1	448	1	448	0	924
ESALQ_1598	MANIB_1496	100.00	477	0	0	1	477	1	477	0	983
ESALQ_1599	MANIB_1495	99.42	342	2	0	1	342	1	342	0	697
ESALQ_1600	MANIB_1494	95.66	898	16	2	1	898	1	875	0	1759
ESALQ_1602	MANIB_1491	98.58	351	5	0	83	433	160	510	0	709
ESALQ_1603	MANIB_1490	99.42	347	2	0	1	347	1	347	0	694
ESALQ_1604	MANIB_1489	99.58	706	3	0	1	706	1	706	0	1474
ESALQ_1605	MANIB_1488	96.58	643	1	1	1	622	1	643	0	1283
ESALQ_1606	MANIB_1487	98.08	522	10	0	1	522	1	522	0	1040
ESALQ_1607	MANIB_1486	98.72	391	2	1	1	388	1	391	0	790
ESALQ_1608	MANIB_1485	99.68	927	3	0	1	927	1	927	0	1907
ESALQ_1609	MANIB_1484	98.88	537	6	0	2	538	123	659	0	1102
ESALQ_1610	MANIB_1483	99.28	691	5	0	1	691	1	691	0	1407
ESALQ_1611	MANIB_1482	99.26	544	4	0	632	1175	350	893	0	1131
ESALQ_1612	MANIB_1481	99.70	336	1	0	1	336	1	336	0	686
ESALQ_1613	MANIB_1480	99.20	1130	9	0	290	1419	1	1130	0	2298
ESALQ_1614	MANIB_1479	98.98	1570	16	0	1	1570	1	1570	0	3178
ESALQ_1615	MANIB_1478	100.00	631	0	0	1	631	1	631	0	1306
ESALQ_1618	MANIB_1475	94.90	510	8	1	1	492	1	510	0	987
ESALQ_1619	MANIB_1474	96.22	873	6	1	1	873	1	846	0	1738
ESALQ_1620	MANIB_1473	100.00	716	0	0	1	716	1	716	0	1491
ESALQ_1621	MANIB_1472	99.86	696	1	0	1	696	1	696	0	1441
ESALQ_1622	MANIB_1471	100.00	331	0	0	1	331	1	331	0	672
ESALQ_1623	MANIB_1470	99.22	1032	8	0	1	1032	1	1032	0	2130
ESALQ_1624	MANIB_1469	99.39	657	4	0	1	657	1	657	0	1349
ESALQ_1625	MANIB_1468	100.00	269	0	0	1	269	1	269	0	554
ESALQ_1626	MANIB_1467	98.78	1065	6	1	1	1058	1	1065	0	2172
ESALQ_1627	MANIB_1466	99.85	649	1	0	1	649	1	649	0	1355
ESALQ_1629	MANIB_1465	96.90	323	10	0	84	406	1	323	0	643
ESALQ_1630	MANIB_1464	96.64	1013	12	1	1	1013	1	991	0	1995
ESALQ_1631	MANIB_1463	100.00	1049	0	0	1	1049	1	1049	0	2201
ESALQ_1632	MANIB_1462	99.85	650	1	0	1	650	1	650	0	1343
ESALQ_1633	MANIB_1461	99.01	1012	10	0	1	1012	35	1046	0	2070
ESALQ_1634	MANIB_1460	95.83	504	21	0	1	504	1	504	0	975
ESALQ_1635	MANIB_1459	100.00	517	0	0	1	517	1	517	0	1042
ESALQ_1636	MANIB_1458	99.43	697	4	0	1	697	1	697	0	1453
ESALQ_1637	MANIB_1457	88.52	575	14	2	1	523	1	575	0	1025
ESALQ_1638	MANIB_1456	99.60	253	1	0	1	253	1	253	0	522
ESALQ_1639	MANIB_1455	99.60	496	2	0	1	496	1	496	0	1030
ESALQ_1640	MANIB_1454	97.93	2170	43	1	1	2170	1	2168	0	4391
ESALQ_1641	MANIB_1453	99.20	503	4	0	1	503	1	503	0	1001
ESALQ_1642	MANIB_1452	99.80	504	1	0	1	504	1	504	0	1033
ESALQ_1643	MANIB_1451	99.68	618	2	0	1	618	1	618	0	1193
ESALQ_1644	MANIB_1450	99.26	680	5	0	1	680	1	680	0	1402
ESALQ_1645	MANIB_1449	98.92	741	8	0	1	741	1	741	0	1502
ESALQ_1646	MANIB_1448	99.70	337	1	0	1	337	1	337	0	644
ESALQ_1647	MANIB_1447	95.99	873	5	1	1	873	1	843	0	1731
ESALQ_1648	MANIB_1446	98.31	414	7	0	1	414	22	435	0	843
ESALQ_1649	MANIB_1445	98.71	311	4	0	1	311	1	311	0	634
ESALQ_1651	MANIB_1443	97.15	351	9	1	1	350	1	351	0	693
ESALQ_1653	MANIB_1441	93.51	416	26	1	1	415	1	416	0	626
ESALQ_1654	MANIB_1440	92.59	823	60	1	1	822	1	823	0	1554
ESALQ_1655	MANIB_1439	98.99	495	5	0	87	581	147	641	0	978
ESALQ_1656	MANIB_1438	98.33	1801	29	1	1	1800	1	1801	0	3662
ESALQ_1657	MANIB_1437	99.48	576	3	0	1	576	1	576	0	1196
ESALQ_1658	MANIB_1436	93.95	463	9	2	1	463	1	444	0	882
ESALQ_1659	MANIB_1435	98.81	421	5	0	1	421	1	421	0	868
ESALQ_1660	MANIB_1434	99.04	1351	13	0	1	1351	1	1351	0	2732
ESALQ_1661	MANIB_1433	99.70	991	3	0	19	1009	9	999	0	2025
ESALQ_1662	MANIB_1432	99.34	1059	7	0	1	1059	1	1059	0	2179
ESALQ_1664	MANIB_1430	99.75	792	2	0	1	792	1	792	0	1568
ESALQ_1666	MANIB_1429	97.76	490	11	0	126	615	252	741	0	847
ESALQ_1668	MANIB_1427	92.87	407	0	1	153	559	5	382	0	776
ESALQ_1669	MANIB_1426	99.33	450	3	0	1	450	1	450	0	924
ESALQ_1670	MANIB_1425	99.67	304	1	0	1	304	1	304	0	630
ESALQ_1671	MANIB_1424	96.29	566	2	1	99	664	1	547	0	1072
ESALQ_1672	MANIB_1423	98.90	996	11	0	1	996	1	996	0	2029
ESALQ_1676	MANIB_1419	97.54	407	10	0	91	497	1	407	0	803
ESALQ_1677	MANIB_1418	92.26	323	25	0	1	323	1	323	0	575
ESALQ_1678	MANIB_1417	99.23	653	5	0	1	653	1	653	0	1343
ESALQ_1679	MANIB_1416	97.50	800	15	1	1	800	1	795	0	1593
ESALQ_1680	MANIB_1415	99.44	534	3	0	1	534	1	534	0	1086
ESALQ_1681	MANIB_1414	99.39	653	4	0	1	653	1	653	0	1332
ESALQ_1683	MANIB_1411	93.97	448	4	2	49	474	1	447	0	840
ESALQ_1686	MANIB_1408	99.46	372	2	0	1	372	1	372	0	721
ESALQ_1687	MANIB_1407	97.45	1295	21	1	1	1295	1	1283	0	2616
ESALQ_1688	MANIB_1406	99.25	932	7	0	253	1184	1	932	0	1877
ESALQ_1689	MANIB_1404	99.21	252	2	0	1	252	1	252	0	514
ESALQ_1690	MANIB_1403	97.01	502	11	1	1	498	1	502	0	975
ESALQ_1691	MANIB_1402	99.84	629	1	0	1	629	1	629	0	1281
ESALQ_1692	MANIB_1401	98.35	1211	18	1	1	1211	1	1209	0	2399
ESALQ_1694	MANIB_1399	97.10	414	12	0	1	414	1	414	0	830
ESALQ_1695	MANIB_1398	99.85	648	1	0	1	648	1	648	0	1335
ESALQ_1697	MANIB_1397	96.50	515	18	0	1	515	1	515	0	1027
ESALQ_1698	MANIB_1396	97.23	470	6	1	84	546	87	556	0	931
ESALQ_1699	MANIB_1395	99.37	479	3	0	1	479	1	479	0	986
ESALQ_1700	MANIB_1394	99.27	550	4	0	1	550	1	550	0	1125
ESALQ_1701	MANIB_1393	98.22	674	12	0	1	674	1	674	0	1348
ESALQ_1702	MANIB_1392	97.53	283	7	0	1	283	1	283	0	566
ESALQ_1704	MANIB_1390	98.18	330	4	2	1	328	1	330	0	630
ESALQ_1706	MANIB_1388	98.63	364	5	0	1	364	1	364	0	714
ESALQ_1707	MANIB_1387	98.89	541	6	0	1	541	1	541	0	1044
ESALQ_1708	MANIB_1386	99.15	352	3	0	1	352	1	352	0	718
ESALQ_1709	MANIB_1385	99.50	399	2	0	1	399	1	399	0	829
ESALQ_1711	MANIB_1383	95.82	335	14	0	1	335	1	335	0	667
ESALQ_1712	MANIB_1382	96.64	536	18	0	1	536	1	536	0	1058
ESALQ_1713	MANIB_1381	94.26	383	21	1	1	382	1	383	0	734
ESALQ_1714	MANIB_1380	92.86	364	23	1	1	364	1	361	0	692
ESALQ_1717	MANIB_10857	76.67	403	91	2	11	413	31	430	0	612
ESALQ_1718	MANIB_1378	94.29	578	25	2	1	578	1	570	0	1058
ESALQ_1719	MANIB_1377	99.22	256	2	0	1	256	1	256	0	522
ESALQ_1720	MANIB_1376	98.92	370	4	0	1	370	1	370	0	759
ESALQ_1721	MANIB_1375	100.00	278	0	0	1	278	1	278	0	564
ESALQ_1722	MANIB_1374	99.14	813	7	0	1	813	1	813	0	1677
ESALQ_1723	MANIB_1373	99.46	552	3	0	1	552	1	552	0	1142
ESALQ_1725	MANIB_1371	99.20	249	2	0	1	249	1	249	0	508
ESALQ_1726	MANIB_1370	98.89	1447	16	0	1	1447	1	1447	0	2977
ESALQ_1727	MANIB_1368	100.00	276	0	0	1	276	1	276	0	561
ESALQ_1728	MANIB_1367	99.10	335	3	0	1	335	1	335	0	686
ESALQ_1729	MANIB_1366	100.00	313	0	0	1	313	1	313	0	653
ESALQ_1730	MANIB_1365	97.88	566	12	0	1	566	1	566	0	1135
ESALQ_1731	MANIB_1364	96.00	625	15	1	1	615	1	625	0	1151
ESALQ_1732	MANIB_1363	98.82	255	3	0	1	255	1	255	0	516
ESALQ_1735	MANIB_1360	100.00	439	0	0	1	439	1	439	0	916
ESALQ_1736	MANIB_1359	99.07	431	4	0	1	431	1	431	0	881
ESALQ_1737	MANIB_1358	99.87	774	0	1	1	774	1	773	0	1590
ESALQ_1738	MANIB_1357	99.81	528	1	0	1	528	1	528	0	1100
ESALQ_1739	MANIB_1356	99.57	467	2	0	1	467	1	467	0	962
ESALQ_1740	MANIB_1355	98.64	369	5	0	25	393	122	490	0	744
ESALQ_1741	MANIB_1354	98.31	296	5	0	1	296	1	296	0	607
ESALQ_1742	MANIB_1353	99.14	934	8	0	1	934	1	934	0	1833
ESALQ_1743	MANIB_1352	98.77	407	5	0	1	407	5	411	0	805
ESALQ_1744	MANIB_1351	99.68	618	2	0	1	618	1	618	0	1270
ESALQ_1745	MANIB_1350	98.99	398	4	0	1	398	1	398	0	799
ESALQ_1746	MANIB_1349	94.88	488	2	1	1	465	1	488	0	934
ESALQ_1747	MANIB_1348	99.17	1323	11	0	1	1323	1	1323	0	2601
ESALQ_1750	MANIB_1344	93.42	365	24	0	207	571	59	423	0	654
ESALQ_1752	MANIB_1342	96.96	526	16	0	1	526	1	526	0	1062
ESALQ_1754	MANIB_1339	100.00	451	0	0	1	451	1	451	0	949
ESALQ_1756	MANIB_1338	99.59	486	2	0	1	486	1	486	0	994
ESALQ_1757	MANIB_1337	99.26	672	2	2	1	670	1	671	0	1380
ESALQ_1758	MANIB_1336	99.66	1190	4	0	1	1190	1	1190	0	2423
ESALQ_1759	MANIB_1335	96.62	621	21	0	1	621	1	621	0	1255
ESALQ_1760	MANIB_1334	90.10	293	6	1	1	270	1	293	0	532
ESALQ_1761	MANIB_1333	97.53	932	22	1	1	932	1	931	0	1859
ESALQ_1762	MANIB_1332	98.32	536	9	0	1	536	1	536	0	1044
ESALQ_1763	MANIB_1331	95.39	629	11	1	1	629	1	611	0	1248
ESALQ_1768	MANIB_1327	99.20	375	3	0	74	448	17	391	0	760
ESALQ_1771	MANIB_1323	91.87	369	6	1	1	369	76	420	0	668
ESALQ_1772	MANIB_1322	94.92	1121	38	5	1	1119	1	1104	0	2009
ESALQ_1774	MANIB_1320	98.60	572	8	0	1	572	1	572	0	1153
ESALQ_1775	MANIB_1319	99.26	1358	9	1	1	1357	1	1358	0	2796
ESALQ_1776	MANIB_1318	98.15	542	10	0	1	542	1	542	0	1066
ESALQ_1777	MANIB_1317	98.10	422	8	0	1	422	1	422	0	857
ESALQ_1778	MANIB_1316	96.53	375	13	0	1	375	1	375	0	741
ESALQ_1779	MANIB_1315	99.74	391	1	0	1	391	1	391	0	795
ESALQ_1780	MANIB_1314	98.70	462	6	0	1	462	1	462	0	944
ESALQ_1781	MANIB_1313	100.00	271	0	0	1	271	1	271	0	564
ESALQ_1782	MANIB_1312	83.91	901	19	3	1	813	1	863	0	1504
ESALQ_1783	MANIB_1311	99.01	406	4	0	1	406	1	406	0	843
ESALQ_1784	MANIB_1310	98.50	533	8	0	1	533	1	533	0	1098
ESALQ_1785	MANIB_1309	99.22	384	3	0	1	384	1	384	0	786
ESALQ_1790	MANIB_1307	93.74	495	30	1	1	495	1	494	0	846
ESALQ_1791	MANIB_1306	98.81	1507	18	0	1	1507	1	1507	0	3060
ESALQ_1792	MANIB_1305	99.27	274	2	0	1	274	1	274	0	560
ESALQ_1793	MANIB_1304	98.48	527	8	0	1	527	1	527	0	1082
ESALQ_1794	MANIB_1303	99.56	453	2	0	1	453	1	453	0	933
ESALQ_1795	MANIB_1302	94.30	772	44	0	1	772	1	772	0	1494
ESALQ_1796	MANIB_1301	98.98	591	6	0	1	591	1	591	0	1242
ESALQ_1797	MANIB_1300	97.28	478	6	1	1	471	1	478	0	961
ESALQ_1798	MANIB_1299	100.00	513	0	0	1	513	1	513	0	1065
ESALQ_1799	MANIB_1298	88.63	510	17	2	1	510	1	469	0	897
ESALQ_1800	MANIB_1297	94.51	510	20	1	1	510	1	502	0	971
ESALQ_1801	MANIB_1296	98.75	641	8	0	1	641	1	641	0	1318
ESALQ_1803	MANIB_1294	98.04	560	8	1	1	560	1	557	0	1114
ESALQ_1804	MANIB_1293	98.71	464	6	0	1	464	1	464	0	953
ESALQ_1805	MANIB_1292	99.63	270	1	0	1	270	1	270	0	555
ESALQ_1806	MANIB_1291	98.81	589	7	0	1	589	1	589	0	1180
ESALQ_1807	MANIB_1290	98.32	1609	27	0	1	1609	1	1609	0	3280
ESALQ_1808	MANIB_1289	97.69	477	10	1	1	477	1	476	0	949
ESALQ_1810	MANIB_1288	98.81	588	7	0	1	588	1	588	0	1179
ESALQ_1812	MANIB_1286	97.83	323	7	0	1	323	1	323	0	578
ESALQ_1813	MANIB_1285	99.48	574	3	0	446	1019	1	574	0	1118
ESALQ_1814	MANIB_1284	97.62	252	6	0	1	252	1	252	0	501
ESALQ_1815	MANIB_1283	98.64	442	6	0	4	445	30	471	0	901
ESALQ_1821	MANIB_1278	100.00	1004	0	0	1	1004	1	1004	0	2078
ESALQ_1823	MANIB_1276	99.40	1008	6	0	1	1008	1	1008	0	2066
ESALQ_1825	MANIB_1274	98.97	1065	11	0	1	1065	1	1065	0	2154
ESALQ_1826	MANIB_1273	98.14	377	7	0	1	377	1	377	0	769
ESALQ_1827	MANIB_1272	96.17	496	18	1	1	496	1	495	0	922
ESALQ_1828	MANIB_1271	98.14	538	9	1	15	551	1	538	0	1083
ESALQ_1829	MANIB_1270	96.47	567	13	1	1	560	1	567	0	1092
ESALQ_1830	MANIB_1269	99.89	881	1	0	1	881	1	881	0	1821
ESALQ_1831	MANIB_1268	98.78	2457	28	2	297	2751	289	2745	0	5026
ESALQ_1833	MANIB_1266	99.22	1021	8	0	1	1021	1	1021	0	2036
ESALQ_1834	MANIB_1265	97.04	810	18	1	1	804	1	810	0	1571
ESALQ_1835	MANIB_1264	99.32	887	6	0	1	887	1	887	0	1781
ESALQ_1836	MANIB_1263	99.69	3207	10	0	1	3207	1	3207	0	6554
ESALQ_1837	MANIB_1262	99.25	666	5	0	1	666	1	666	0	1349
ESALQ_1839	MANIB_1260	98.70	308	4	0	1	308	1	308	0	633
ESALQ_1840	MANIB_1259	98.23	452	8	0	1	452	1	452	0	912
ESALQ_1841	MANIB_1258	98.48	591	9	0	1	591	21	611	0	1213
ESALQ_1842	MANIB_1257	99.00	600	6	0	1	600	1	600	0	1236
ESALQ_1843	MANIB_1256	96.33	762	9	1	1	743	1	762	0	1492
ESALQ_1844	MANIB_1255	99.87	786	1	0	1	786	1	786	0	1592
ESALQ_1845	MANIB_1254	90.46	304	10	1	1	285	1	304	0	571
ESALQ_1846	MANIB_1253	96.17	444	11	1	1	438	1	444	0	797
ESALQ_1848	MANIB_1251	98.47	588	9	0	1	588	1	588	0	1199
ESALQ_1849	MANIB_1250	98.49	529	8	0	1	529	1	529	0	1095
ESALQ_1850	MANIB_1249	99.77	428	1	0	1	428	1	428	0	885
ESALQ_1853	MANIB_1246	80.42	567	52	4	1	510	1	565	0	876
ESALQ_1854	MANIB_1245	98.52	540	8	0	1	540	1	540	0	1108
ESALQ_1855	MANIB_1244	100.00	606	0	0	1	606	1	606	0	1254
ESALQ_1856	MANIB_1243	99.25	536	4	0	1	536	1	536	0	1100
ESALQ_1857	MANIB_1242	98.92	558	6	0	1	558	1	558	0	1128
ESALQ_1858	MANIB_1241	99.59	241	1	0	2	242	21	261	0	500
ESALQ_1859	MANIB_1240	99.23	261	2	0	1	261	1	261	0	533
ESALQ_1860	MANIB_1239	99.31	288	2	0	1	288	1	288	0	585
ESALQ_1861	MANIB_1238	88.32	642	31	4	1	598	1	642	0	1087
ESALQ_1862	MANIB_1236	97.77	583	10	1	1	580	1	583	0	1151
ESALQ_1863	MANIB_1235	97.53	283	7	0	1	283	1	283	0	571
ESALQ_1864	MANIB_1234	99.30	287	2	0	1	287	1	287	0	584
ESALQ_1865	MANIB_1233	93.66	284	5	1	1	284	1	271	0	547
ESALQ_1866	MANIB_1232	96.04	303	12	0	1	303	1	303	0	592
ESALQ_1867	MANIB_1231	99.84	621	0	1	1	621	1	620	0	1266
ESALQ_1869	MANIB_1230	92.33	821	21	1	1	821	1	779	0	1540
ESALQ_1870	MANIB_1229	99.52	413	2	0	1	413	1	413	0	847
ESALQ_1871	MANIB_1228	95.92	294	7	1	423	716	476	764	0	567
ESALQ_1873	MANIB_1226	98.24	567	10	0	1	567	1	567	0	1148
ESALQ_1875	MANIB_1224	99.44	540	3	0	1	540	65	604	0	1095
ESALQ_1876	MANIB_1223	96.65	1314	2	1	1	1314	1	1272	0	2576
ESALQ_1877	MANIB_1222	100.00	335	0	0	1	335	1	335	0	671
ESALQ_1878	MANIB_1221	98.87	529	6	0	1	529	1	529	0	1079
ESALQ_1879	MANIB_1219	99.81	518	1	0	1	518	1	518	0	1038
ESALQ_1881	MANIB_1217	96.01	551	9	1	1	551	1	538	0	1094
ESALQ_1882	MANIB_1216	98.62	580	8	0	1	580	1	580	0	1191
ESALQ_1883	MANIB_1215	97.76	491	11	0	1	491	1	491	0	993
ESALQ_1884	MANIB_1214	99.49	593	3	0	1	593	1	593	0	1230
ESALQ_1885	MANIB_1213	98.74	1429	18	0	1	1429	1	1429	0	2924
ESALQ_1886	MANIB_1212	89.57	537	16	4	1	537	1	497	0	937
ESALQ_1888	MANIB_1210	98.30	352	5	1	1	351	1	352	0	711
ESALQ_1889	MANIB_1209	99.68	620	2	0	1	620	1	620	0	1242
ESALQ_1890	MANIB_1208	96.28	323	12	0	1	323	1	323	0	641
ESALQ_1891	MANIB_1207	98.44	257	4	0	1	257	1	257	0	516
ESALQ_1893	MANIB_1205	98.82	591	7	0	1	591	1	591	0	1193
ESALQ_1894	MANIB_1204	94.56	294	16	0	1	294	1	294	0	572
ESALQ_1895	MANIB_1203	96.37	578	14	2	1	571	16	593	0	1131
ESALQ_1896	MANIB_1202	97.12	278	8	0	1	278	1	278	0	556
ESALQ_1898	MANIB_1200	99.91	1122	1	0	1	1122	1	1122	0	2314
ESALQ_1899	MANIB_1199	98.11	318	6	0	1	318	1	318	0	643
ESALQ_1900	MANIB_1197	99.28	416	3	0	1	416	1	416	0	845
ESALQ_1901	MANIB_1196	99.09	987	9	0	1	987	1	987	0	2014
ESALQ_1902	MANIB_1195	99.49	787	4	0	1	787	1	787	0	1593
ESALQ_1904	MANIB_1193	98.44	257	4	0	1	257	1	257	0	526
ESALQ_1905	MANIB_1192	95.78	1043	11	1	1	1010	1	1043	0	2028
ESALQ_1907	MANIB_1190	98.81	337	4	0	1	337	1	337	0	661
ESALQ_1909	MANIB_1188	98.59	567	3	1	1	567	1	562	0	1164
ESALQ_1910	MANIB_1187	99.71	340	1	0	1	340	1	340	0	683
ESALQ_1911	MANIB_1186	91.63	633	42	2	1	631	1	624	0	1187
ESALQ_1912	MANIB_1185	99.63	1083	4	0	1	1083	1	1083	0	2249
ESALQ_1913	MANIB_1184	100.00	298	0	0	1	298	1	298	0	607
ESALQ_1914	MANIB_1183	92.66	368	6	1	1	368	1	347	0	694
ESALQ_1915	MANIB_1182	100.00	278	0	0	1	278	1	278	0	574
ESALQ_1916	MANIB_1181	99.84	622	1	0	1	622	1	622	0	1280
ESALQ_1917	MANIB_1180	99.56	458	2	0	1	458	1	458	0	955
ESALQ_1918	MANIB_1179	83.24	370	7	2	1	315	1	370	0	586
ESALQ_1919	MANIB_1178	90.84	415	14	1	1	415	1	391	0	757
ESALQ_1920	MANIB_1177	99.26	539	4	0	1	539	64	602	0	1104
ESALQ_1921	MANIB_1176	99.54	862	4	0	1	862	1	862	0	1783
ESALQ_1922	MANIB_1175	76.96	382	60	4	1	359	1	377	0	531
ESALQ_1923	MANIB_1174	99.49	590	3	0	1	590	1	590	0	1190
ESALQ_1925	MANIB_1172	99.18	1823	15	0	1	1823	1	1823	0	3712
ESALQ_1926	MANIB_1171	93.22	354	24	0	1	354	1	354	0	686
ESALQ_1927	MANIB_1170	99.46	555	3	0	1	555	19	573	0	1154
ESALQ_1929	MANIB_1168	98.42	947	9	2	1	947	1	941	0	1923
ESALQ_1930	MANIB_1167	98.89	361	3	1	1	361	1	360	0	730
ESALQ_1931	MANIB_1166	99.71	684	2	0	1	684	1	684	0	1427
ESALQ_1934	MANIB_1163	90.29	896	53	6	10	874	38	930	0	1554
ESALQ_1935	MANIB_1162	99.67	897	3	0	1	897	1	897	0	1860
ESALQ_1936	MANIB_1161	98.67	1200	16	0	1	1200	1	1200	0	2345
ESALQ_1937	MANIB_1160	98.55	484	7	0	39	522	17	500	0	998
ESALQ_1938	MANIB_1159	94.74	437	23	0	1	437	1	437	0	852
ESALQ_1941	MANIB_1156	98.27	347	6	0	1	347	1	347	0	706
ESALQ_1943	MANIB_1154	97.80	726	15	1	1	725	1	726	0	1463
ESALQ_1944	MANIB_1153	100.00	423	0	0	1	423	1	423	0	855
ESALQ_1945	MANIB_1152	99.50	802	4	0	1	802	1	802	0	1649
ESALQ_1946	MANIB_1151	99.72	354	1	0	1	354	1	354	0	739
ESALQ_1947	MANIB_1150	99.32	292	2	0	1	292	1	292	0	609
ESALQ_1948	MANIB_1149	99.66	296	1	0	1	296	1	296	0	608
ESALQ_1950	MANIB_1147	97.44	312	6	2	1	310	1	312	0	613
ESALQ_1951	MANIB_1146	97.99	398	8	0	1	398	1	398	0	786
ESALQ_1952	MANIB_1145	100.00	253	0	0	1	253	1	253	0	524
ESALQ_1955	MANIB_1142	100.00	319	0	0	1	319	1	319	0	668
ESALQ_1957	MANIB_1140	98.04	611	12	0	1	611	1	611	0	1230
ESALQ_1958	MANIB_1139	99.79	466	1	0	1	466	1	466	0	963
ESALQ_1959	MANIB_1138	98.67	526	7	0	479	1004	1	526	0	1075
ESALQ_1960	MANIB_1136	98.50	467	7	0	1	467	1	467	0	956
ESALQ_1961	MANIB_1135	97.21	359	10	0	1	359	1	359	0	715
ESALQ_1962	MANIB_1134	98.21	447	8	0	1	447	1	447	0	918
ESALQ_1963	MANIB_1133	86.67	405	7	1	1	405	1	358	0	702
ESALQ_1964	MANIB_1132	97.92	867	18	0	1	867	1	867	0	1766
ESALQ_1965	MANIB_1131	97.88	3876	81	1	1	3875	1	3876	0	7892
ESALQ_1966	MANIB_1130	98.12	531	10	0	1	531	1	531	0	1088
ESALQ_1967	MANIB_1129	97.47	554	14	0	1	554	1	554	0	1123
ESALQ_1968	MANIB_1128	100.00	345	0	0	14	358	2	346	0	727
ESALQ_1969	MANIB_1127	99.22	386	3	0	1	386	1	386	0	776
ESALQ_1970	MANIB_1126	97.76	313	7	0	1	313	1	313	0	627
ESALQ_1971	MANIB_1125	96.96	724	22	0	1	724	1	724	0	1391
ESALQ_1972	MANIB_1124	99.09	550	5	0	1	550	1	550	0	1125
ESALQ_1973	MANIB_1123	98.56	555	8	0	1	555	1	555	0	1102
ESALQ_1975	MANIB_1121	95.82	263	9	1	1	263	1	261	0	507
ESALQ_1976	MANIB_1120	98.12	533	10	0	1	533	1	533	0	1091
ESALQ_1977	MANIB_1119	100.00	499	0	0	1	499	1	499	0	1033
ESALQ_1978	MANIB_1118	99.55	447	2	0	1	447	1	447	0	921
ESALQ_1980	MANIB_1116	94.02	468	18	1	1	468	1	458	0	849
ESALQ_1981	MANIB_1115	98.79	1321	16	0	1	1321	1	1321	0	2599
ESALQ_1982	MANIB_1114	100.00	340	0	0	1	340	1	340	0	707
ESALQ_1986	MANIB_1110	98.84	259	3	0	1	259	1	259	0	524
ESALQ_1987	MANIB_1109	98.05	925	18	0	1	925	1	925	0	1860
ESALQ_1990	MANIB_1106	99.90	1033	1	0	1	1033	1	1033	0	2098
ESALQ_1991	MANIB_1105	99.53	427	2	0	1	427	1	427	0	887
ESALQ_1994	MANIB_1102	98.04	459	9	0	1	459	1	459	0	929
ESALQ_1995	MANIB_1101	98.84	519	6	0	1	519	1	519	0	1057
ESALQ_1996	MANIB_1100	82.64	386	13	3	1	386	1	332	0	634
ESALQ_2000	MANIB_1096	96.04	656	19	3	1	649	1	656	0	1270
ESALQ_2001	MANIB_1095	98.27	637	11	0	1	637	1	637	0	1299
ESALQ_2002	MANIB_1094	99.93	1415	1	0	1	1415	1	1415	0	2922
ESALQ_2004	MANIB_1093	99.18	1217	10	0	1	1217	1	1217	0	2459
ESALQ_2006	MANIB_1091	99.75	811	2	0	1	811	1	811	0	1673
ESALQ_2007	MANIB_1090	99.35	464	3	0	1	464	1	464	0	949
ESALQ_2009	MANIB_1088	99.52	420	2	0	246	665	339	758	0	889
ESALQ_2010	MANIB_1087	98.78	329	4	0	1	329	1	329	0	672
ESALQ_2011	MANIB_1086	98.75	319	4	0	1	319	17	335	0	648
ESALQ_2012	MANIB_1085	99.27	1101	8	0	1	1101	1	1101	0	2253
ESALQ_2013	MANIB_1084	97.07	273	8	0	1	273	1	273	0	538
ESALQ_2014	MANIB_1081	96.54	520	18	0	1	520	1	520	0	1032
ESALQ_2016	MANIB_1079	99.16	955	8	0	208	1162	1	955	0	1837
ESALQ_2020	MANIB_1076	99.37	953	6	0	1	953	1	953	0	1929
ESALQ_2021	MANIB_1075	97.42	659	1	1	11	653	9	667	0	1332
ESALQ_2022	MANIB_1074	97.22	395	11	0	1	395	1	395	0	775
ESALQ_2023	MANIB_1073	98.21	390	7	0	1	390	1	390	0	786
ESALQ_2024	MANIB_1072	98.70	308	3	1	1	308	1	307	0	622
ESALQ_2025	MANIB_1071	99.54	439	2	0	1	439	1	439	0	897
ESALQ_2026	MANIB_1070	95.74	728	12	2	50	759	3	729	0	1410
ESALQ_2027	MANIB_1069	99.73	1109	3	0	1	1109	1	1109	0	2289
ESALQ_2029	MANIB_1068	99.37	1424	9	0	9	1432	8	1431	0	2877
ESALQ_2030	MANIB_1067	99.92	1293	1	0	1	1293	1	1293	0	2641
ESALQ_2032	MANIB_1064	99.80	493	1	0	1	493	1	493	0	1006
ESALQ_2033	MANIB_1063	99.26	813	6	0	1	813	1	813	0	1644
ESALQ_2034	MANIB_1062	99.30	1004	3	1	1	1000	1	1004	0	2017
ESALQ_2035	MANIB_1061	94.01	284	4	1	1	284	1	271	0	544
ESALQ_2036	MANIB_1060	96.89	1191	35	1	1	1189	1	1191	0	2369
ESALQ_2037	MANIB_1059	98.04	408	7	1	1	408	1	407	0	811
ESALQ_2038	MANIB_1058	73.70	384	70	2	215	597	150	503	0	586
ESALQ_2039	MANIB_1056	92.73	330	24	0	1	330	1	330	0	541
ESALQ_2040	MANIB_1055	98.89	901	10	0	1	901	1	901	0	1822
ESALQ_2041	MANIB_1054	94.24	347	3	1	1	330	1	347	0	661
ESALQ_2042	MANIB_1053	98.20	724	13	0	1	724	92	815	0	1448
ESALQ_2043	MANIB_1052	97.64	423	0	1	1	423	1	413	0	849
ESALQ_2044	MANIB_1051	97.43	544	14	0	1	544	1	544	0	1091
ESALQ_2045	MANIB_1050	100.00	273	0	0	1	273	1	273	0	555
ESALQ_2046	MANIB_1049	98.39	1057	17	0	52	1108	13	1069	0	2139
ESALQ_2047	MANIB_1048	99.74	1138	3	0	1	1138	1	1138	0	2380
ESALQ_2048	MANIB_1047	99.76	419	1	0	1	419	1	419	0	868
ESALQ_2049	MANIB_1046	99.10	1659	13	1	1	1657	1	1659	0	3388
ESALQ_2050	MANIB_1045	98.81	840	10	0	1	840	1	840	0	1726
ESALQ_2051	MANIB_1044	99.15	472	4	0	1	472	1	472	0	972
ESALQ_2052	MANIB_1043	100.00	485	0	0	1	485	1	485	0	997
ESALQ_2053	MANIB_1042	97.97	345	2	1	1	340	69	413	0	671
ESALQ_2054	MANIB_1041	100.00	319	0	0	1	319	1	319	0	647
ESALQ_2055	MANIB_1040	99.18	729	5	1	1	728	1	729	0	1446
ESALQ_2056	MANIB_1039	98.27	463	8	0	1	463	1	463	0	948
ESALQ_2057	MANIB_1038	100.00	397	0	0	1	397	1	397	0	817
ESALQ_2058	MANIB_1037	98.15	487	9	0	1	487	1	487	0	990
ESALQ_2059	MANIB_1036	99.81	513	1	0	1	513	1	513	0	1044
ESALQ_2060	MANIB_1035	97.25	436	11	1	1	436	1	435	0	850
ESALQ_2061	MANIB_1034	99.03	724	7	0	1	724	1	724	0	1359
ESALQ_2063	MANIB_1032	99.63	269	1	0	1	269	1	269	0	522
ESALQ_2064	MANIB_1031	77.14	350	32	2	1	348	1	304	0	530
ESALQ_2065	MANIB_1030	98.74	714	8	1	1	714	1	713	0	1432
ESALQ_2066	MANIB_1029	99.07	1075	10	0	1	1075	1	1075	0	2179
ESALQ_2067	MANIB_1028	94.78	441	23	0	60	500	14	454	0	830
ESALQ_2068	MANIB_1027	95.48	310	14	0	1	310	1	310	0	608
ESALQ_2069	MANIB_1026	99.10	334	3	0	1	334	1	334	0	682
ESALQ_2070	MANIB_1025	99.67	907	3	0	1	907	1	907	0	1852
ESALQ_2071	MANIB_1024	95.78	379	16	0	1	379	1	379	0	715
ESALQ_2072	MANIB_1023	98.87	530	6	0	1	530	1	530	0	1062
ESALQ_2074	MANIB_1022	90.46	797	54	2	1	797	1	775	0	1432
ESALQ_2075	MANIB_1021	96.51	1002	25	1	1	992	1	1002	0	1954
ESALQ_2076	MANIB_1020	98.42	698	10	1	1	697	1	698	0	1368
ESALQ_2077	MANIB_1019	97.75	757	17	0	1	757	1	757	0	1536
ESALQ_2078	MANIB_1018	99.61	254	1	0	1	254	1	254	0	519
ESALQ_2079	MANIB_1017	96.14	466	9	1	1	466	1	457	0	917
ESALQ_2080	MANIB_7253	99.12	1138	10	0	1	1138	1	1138	0	2330
ESALQ_2081	MANIB_7251	99.42	513	3	0	1	513	1	513	0	1065
ESALQ_2083	MANIB_7249	99.16	712	6	0	1	712	1	712	0	1452
ESALQ_2087	MANIB_7246	99.19	369	3	0	1	369	1	369	0	764
ESALQ_2088	MANIB_7245	89.04	356	13	2	1	330	1	356	0	601
ESALQ_2089	MANIB_7244	97.68	990	23	0	1	990	1	990	0	2006
ESALQ_2090	MANIB_7243	99.70	662	2	0	1	662	1	662	0	1360
ESALQ_2092	MANIB_7242	100.00	382	0	0	1	382	1	382	0	793
ESALQ_2093	MANIB_7241	97.57	370	9	0	1	370	1	370	0	745
ESALQ_2095	MANIB_7240	94.69	1262	17	3	1	1213	1	1261	0	2435
ESALQ_2096	MANIB_7239	89.26	298	1	1	79	345	89	386	0	528
ESALQ_2097	MANIB_7238	98.42	1015	11	2	1	1013	1	1012	0	2070
ESALQ_2098	MANIB_7237	93.62	1081	22	1	1	1081	1	1034	0	2052
ESALQ_2099	MANIB_7236	97.80	364	8	0	1	364	1	364	0	736
ESALQ_2100	MANIB_7235	98.69	383	5	0	1	383	1	383	0	771
ESALQ_2101	MANIB_7234	98.66	298	4	0	1	298	1	298	0	595
ESALQ_2102	MANIB_7233	99.73	1496	4	0	1	1496	1	1496	0	3044
ESALQ_2103	MANIB_7232	100.00	283	0	0	1	283	1	283	0	594
ESALQ_2104	MANIB_7231	98.91	458	5	0	1	458	1055	1512	0	898
ESALQ_2105	MANIB_7231	95.90	999	41	0	1	999	1	999	0	1867
ESALQ_2106	MANIB_7230	99.34	455	3	0	1	455	1	455	0	935
ESALQ_2107	MANIB_7229	97.14	419	12	0	1	419	1	419	0	783
ESALQ_2109	MANIB_7227	98.13	643	12	0	1	643	1	643	0	1288
ESALQ_2114	MANIB_7222	99.36	313	2	0	1	313	1	313	0	638
ESALQ_2115	MANIB_7221	99.39	491	3	0	1	491	1	491	0	1013
ESALQ_2116	MANIB_7220	98.05	256	5	0	6	261	28	283	0	521
ESALQ_2118	MANIB_7218	99.10	554	4	1	1	553	1	554	0	1140
ESALQ_2119	MANIB_7217	92.28	479	20	1	1	479	1	462	0	869
ESALQ_2120	MANIB_7216	100.00	289	0	0	1	289	156	444	0	600
ESALQ_2121	MANIB_7215	95.98	572	17	2	20	587	86	655	0	1115
ESALQ_2122	MANIB_7214	95.42	262	12	0	1	262	41	302	0	517
ESALQ_2124	MANIB_7213	99.32	2061	14	0	1	2061	1	2061	0	4189
ESALQ_2125	MANIB_7212	98.57	280	4	0	1	280	1	280	0	568
ESALQ_2127	MANIB_7210	94.95	495	15	1	1	495	1	485	0	913
ESALQ_2128	MANIB_7209	100.00	264	0	0	157	420	1	264	0	553
ESALQ_2132	MANIB_7205	99.62	1048	4	0	1	1048	1	1048	0	2172
ESALQ_2135	MANIB_2569	86.72	881	67	6	1	881	1	831	0	1529
ESALQ_2137	MANIB_785	44.56	790	347	18	1	754	1	735	0	582
ESALQ_2138	MANIB_2567	96.25	373	14	0	1	373	69	441	0	738
ESALQ_2139	MANIB_2566	98.31	296	5	0	1	296	1	296	0	602
ESALQ_2144	MANIB_2562	98.93	932	10	0	1	932	1	932	0	1877
ESALQ_2147	MANIB_2559	99.37	1276	5	1	1	1276	1	1273	0	2532
ESALQ_2148	MANIB_2558	95.41	458	21	0	43	500	84	541	0	878
ESALQ_2149	MANIB_2557	99.90	1046	1	0	1	1046	1	1046	0	2173
ESALQ_2151	MANIB_2556	97.14	350	10	0	1	350	1	350	0	641
ESALQ_2153	MANIB_2555	99.20	250	2	0	1	250	1	250	0	513
ESALQ_2154	MANIB_2554	92.14	318	1	1	1	294	1	318	0	551
ESALQ_2155	MANIB_2553	95.25	295	14	0	1	295	1	295	0	565
ESALQ_2156	MANIB_2552	89.10	468	23	3	1	466	1	442	0	829
ESALQ_2159	MANIB_2549	98.97	774	8	0	1	774	1	774	0	1560
ESALQ_2161	MANIB_2547	98.35	728	12	0	1	728	1	728	0	1492
ESALQ_2162	MANIB_2546	99.30	719	5	0	1	719	1	719	0	1479
ESALQ_2163	MANIB_2545	99.68	309	1	0	1	309	1	309	0	632
ESALQ_2165	MANIB_2543	95.56	744	16	1	1	727	1	744	0	1438
ESALQ_2167	MANIB_2541	99.24	524	4	0	1	524	1	524	0	1079
ESALQ_2170	MANIB_2539	98.71	310	4	0	1	310	1	310	0	637
ESALQ_2171	MANIB_2538	99.60	502	2	0	1	502	1	502	0	1014
ESALQ_2172	MANIB_2537	87.33	300	17	1	1	300	1	279	0	507
ESALQ_2176	MANIB_2534	93.66	410	26	0	1	410	1	410	0	724
ESALQ_2178	MANIB_2532	98.08	520	9	1	1	520	1	519	0	1043
ESALQ_2179	MANIB_2531	91.13	2198	125	6	1	2197	1	2129	0	4066
ESALQ_2183	MANIB_2527	100.00	499	0	0	1	499	1	499	0	1038
ESALQ_2184	MANIB_2526	96.56	785	18	1	1	776	1	785	0	1558
ESALQ_2185	MANIB_2525	82.64	484	55	3	1	455	1	484	0	785
ESALQ_2186	MANIB_2524	97.83	691	15	0	1	691	1	691	0	1404
ESALQ_2187	MANIB_2523	94.81	1464	76	0	9	1472	14	1477	0	2852
ESALQ_2188	MANIB_2522	91.89	333	19	1	1	325	1	333	0	633
ESALQ_2190	MANIB_2520	99.80	493	1	0	1	493	1	493	0	1000
ESALQ_2191	MANIB_2519	95.45	1099	36	2	1	1085	1	1099	0	2137
ESALQ_2192	MANIB_2518	96.00	3447	121	1	1	3430	1	3447	0	6851
ESALQ_2193	MANIB_2517	87.96	324	12	1	1	297	1	324	0	530
ESALQ_2194	MANIB_2516	96.58	584	20	0	1	584	1	584	0	1177
ESALQ_2195	MANIB_2515	99.25	265	2	0	65	329	1	265	0	529
ESALQ_2199	MANIB_2507	97.32	783	21	0	1	783	1	783	0	1566
ESALQ_2200	MANIB_2506	97.13	2887	77	1	1	2881	1	2887	0	5748
ESALQ_2202	MANIB_2504	95.46	1035	45	1	1	1035	1	1033	0	2025
ESALQ_2203	MANIB_2503	97.16	352	10	0	1	352	1	352	0	698
ESALQ_2204	MANIB_2502	97.37	380	10	0	1	380	85	464	0	764
ESALQ_2205	MANIB_2501	92.22	501	27	3	1	489	1	501	0	953
ESALQ_2208	MANIB_2498	93.16	307	21	0	1	307	1	307	0	588
ESALQ_2209	MANIB_2497	99.80	490	1	0	1	490	1	490	0	991
ESALQ_2210	MANIB_2496	93.08	723	13	1	1	723	1	686	0	1390
ESALQ_2211	MANIB_2495	99.60	756	3	0	1	756	1	756	0	1562
ESALQ_2213	MANIB_2493	94.93	493	24	1	1	492	1	493	0	860
ESALQ_2214	MANIB_2492	98.60	501	7	0	223	723	141	641	0	973
ESALQ_2215	MANIB_2491	91.74	969	16	2	1	969	1	905	0	1777
ESALQ_2216	MANIB_2490	97.81	685	12	1	17	701	86	767	0	1160
ESALQ_2217	MANIB_2489	100.00	399	0	0	1	399	1	399	0	822
ESALQ_2218	MANIB_2488	98.79	824	9	1	1	824	1	823	0	1701
ESALQ_2219	MANIB_2487	98.97	389	4	0	1	389	1	389	0	801
ESALQ_2221	MANIB_2485	99.29	423	3	0	1	423	1	423	0	875
ESALQ_2222	MANIB_2483	95.82	311	13	0	38	348	1	311	0	620
ESALQ_2223	MANIB_2482	99.70	332	1	0	10	341	1	332	0	679
ESALQ_2225	MANIB_2480	98.38	308	3	1	42	347	1	308	0	590
ESALQ_2226	MANIB_2479	100.00	290	0	0	1	290	1	290	0	587
ESALQ_2227	MANIB_2478	99.78	909	2	0	1	909	125	1033	0	1863
ESALQ_2228	MANIB_2477	98.10	1052	20	0	1	1052	1	1052	0	2117
ESALQ_2229	MANIB_2476	99.73	1469	4	0	1	1469	1	1469	0	3004
ESALQ_2230	MANIB_2475	99.62	2892	11	0	1	2892	1	2892	0	5854
ESALQ_2232	MANIB_2473	99.81	515	1	0	1	515	1	515	0	1017
ESALQ_2233	MANIB_2472	98.93	845	9	0	1	845	1	845	0	1734
ESALQ_2234	MANIB_2471	99.37	316	2	0	1	316	1	316	0	647
ESALQ_2235	MANIB_2470	100.00	316	0	0	1	316	1	316	0	652
ESALQ_2236	MANIB_2468	84.39	788	74	3	1	782	1	745	0	1300
ESALQ_2237	MANIB_2467	99.47	374	2	0	1	374	1	374	0	761
ESALQ_2238	MANIB_2466	99.80	502	1	0	1	502	1	502	0	991
ESALQ_2241	MANIB_2463	99.73	372	1	0	1	372	1	372	0	759
ESALQ_2243	MANIB_2461	93.82	566	10	1	1	541	1	566	0	1088
ESALQ_2244	MANIB_2460	100.00	666	0	0	22	687	397	1062	0	1356
ESALQ_2245	MANIB_2460	98.07	362	7	0	1	362	1	362	0	750
ESALQ_2247	MANIB_2458	96.55	406	14	0	1	406	1	406	0	810
ESALQ_2248	MANIB_2457	98.53	409	6	0	1	409	1	409	0	825
ESALQ_2249	MANIB_2456	99.08	980	9	0	1	980	1	980	0	2007
ESALQ_2252	MANIB_2453	96.91	550	13	1	1	546	1	550	0	1112
ESALQ_2253	MANIB_2452	99.86	1447	2	0	1	1447	1	1447	0	3017
ESALQ_2258	MANIB_2446	100.00	836	0	0	1	836	1	836	0	1733
ESALQ_2259	MANIB_2445	100.00	635	0	0	1	635	1	635	0	1319
ESALQ_2260	MANIB_2444	100.00	553	0	0	1	553	1	553	0	1141
ESALQ_2261	MANIB_2443	99.47	379	2	0	20	398	31	409	0	776
ESALQ_2262	MANIB_2442	99.31	432	3	0	1	432	1	432	0	892
ESALQ_2263	MANIB_2441	97.88	707	15	0	1	707	1	707	0	1404
ESALQ_2265	MANIB_2439	99.46	738	4	0	1	738	1	738	0	1487
ESALQ_2266	MANIB_2438	93.64	283	18	0	1	283	1	283	0	529
ESALQ_2267	MANIB_2436	91.56	971	78	1	709	1679	1	967	0	1742
ESALQ_2268	MANIB_2435	97.30	408	11	0	1	408	1	408	0	810
ESALQ_2269	MANIB_2434	87.19	367	6	3	1	328	1	365	0	633
ESALQ_2270	MANIB_2433	95.05	687	12	1	1	665	1	687	0	1349
ESALQ_2271	MANIB_2432	95.39	369	17	0	1	369	1	369	0	692
ESALQ_2273	MANIB_2430	93.40	788	24	1	625	1384	529	1316	0	1551
ESALQ_2274	MANIB_2429	96.58	322	6	1	1	317	1	322	0	631
ESALQ_2275	MANIB_2428	97.46	354	9	0	1	354	1	354	0	713
ESALQ_2282	MANIB_2424	97.32	336	9	0	1	336	1	336	0	670
ESALQ_2283	MANIB_2423	98.42	379	6	0	1	379	1	379	0	773
ESALQ_2284	MANIB_2422	95.03	624	27	1	9	632	176	795	0	1184
ESALQ_2286	MANIB_2421	98.86	351	4	0	1	351	1	351	0	713
ESALQ_2287	MANIB_2420	97.37	647	15	1	1	647	1	645	0	1298
ESALQ_2289	MANIB_2419	99.56	680	3	0	1	680	1	680	0	1360
ESALQ_2290	MANIB_2418	99.79	473	1	0	1	473	1	473	0	989
ESALQ_2291	MANIB_2417	99.33	894	6	0	1	894	1	894	0	1827
ESALQ_2292	MANIB_2416	94.73	1994	42	2	1	1962	1	1963	0	3824
ESALQ_2293	MANIB_2415	84.88	1177	108	7	1	1168	1	1116	0	1793
ESALQ_2299	MANIB_2410	98.78	905	11	0	8	912	165	1069	0	1838
ESALQ_2301	MANIB_2408	97.31	557	12	2	1	555	1	556	0	1062
ESALQ_2302	MANIB_2407	95.55	382	6	1	1	382	1	371	0	718
ESALQ_2303	MANIB_2406	98.50	333	5	0	1	333	1	333	0	686
ESALQ_2305	MANIB_2404	98.74	633	8	0	1	633	1	633	0	1287
ESALQ_2306	MANIB_2403	97.82	873	9	1	1	873	1	863	0	1764
ESALQ_2307	MANIB_2402	97.85	745	16	0	1	745	1	745	0	1507
ESALQ_2308	MANIB_2401	99.76	425	1	0	1	425	1	425	0	880
ESALQ_2311	MANIB_2399	99.53	426	2	0	1	426	1	426	0	878
ESALQ_2313	MANIB_2397	99.19	494	4	0	1	494	1	494	0	1010
ESALQ_2314	MANIB_2396	100.00	476	0	0	1	476	1	476	0	986
ESALQ_2315	MANIB_2395	99.80	495	1	0	1	495	1	495	0	990
ESALQ_2316	MANIB_2394	98.89	449	5	0	1	449	1	449	0	925
ESALQ_2317	MANIB_2393	98.65	517	7	0	1	517	1	517	0	1065
ESALQ_2319	MANIB_2392	97.40	384	9	1	1	383	1	384	0	761
ESALQ_2320	MANIB_2391	96.94	294	9	0	27	320	494	787	0	579
ESALQ_2321	MANIB_2391	96.09	435	17	0	1	435	6	440	0	872
ESALQ_2322	MANIB_2390	92.04	402	32	0	1	402	1	402	0	773
ESALQ_2324	MANIB_2387	99.47	376	2	0	1	376	1	376	0	767
ESALQ_2325	MANIB_2386	99.42	345	2	0	1	345	1	345	0	715
ESALQ_2326	MANIB_2385	99.71	689	2	0	41	729	39	727	0	1411
ESALQ_2329	MANIB_2382	99.67	304	1	0	1	304	1	304	0	622
ESALQ_2331	MANIB_2379	99.73	1123	3	0	1	1123	1	1123	0	2328
ESALQ_2334	MANIB_2376	100.00	709	0	0	1	709	1	709	0	1454
ESALQ_2336	MANIB_2374	96.00	300	12	0	1	300	1	300	0	596
ESALQ_2337	MANIB_2373	98.83	2053	22	1	1	2053	1	2051	0	4081
ESALQ_2338	MANIB_2372	99.26	271	2	0	1	271	1	271	0	553
ESALQ_2341	MANIB_2369	100.00	315	0	0	1	315	1	315	0	637
ESALQ_2346	MANIB_2365	95.59	612	27	0	1	612	1	612	0	1168
ESALQ_2347	MANIB_2364	100.00	497	0	0	1	497	1	497	0	983
ESALQ_2348	MANIB_2363	94.72	909	10	3	1	909	1	871	0	1753
ESALQ_2349	MANIB_2362	91.08	314	5	2	1	314	1	291	0	561
ESALQ_2350	MANIB_2361	96.60	736	6	1	1	736	1	717	0	1431
ESALQ_2353	MANIB_2358	99.10	443	4	0	1	443	1	443	0	912
ESALQ_2354	MANIB_2357	99.41	337	2	0	1	337	1	337	0	699
ESALQ_2356	MANIB_2355	99.58	476	2	0	1	476	1	476	0	979
ESALQ_2357	MANIB_2354	99.80	489	1	0	1	489	1	489	0	1000
ESALQ_2358	MANIB_2353	100.00	661	0	0	1	661	1	661	0	1366
ESALQ_2360	MANIB_2351	80.21	384	30	3	6	383	130	473	0	536
ESALQ_2363	MANIB_2349	99.63	267	1	0	1	267	1	267	0	550
ESALQ_2364	MANIB_2348	99.49	394	2	0	1	394	1	394	0	758
ESALQ_2366	MANIB_2346	99.69	327	1	0	1	327	1	327	0	615
ESALQ_2368	MANIB_2344	98.68	907	11	1	1	907	1	906	0	1787
ESALQ_2369	MANIB_2343	99.22	513	4	0	1	513	1	513	0	1051
ESALQ_2371	MANIB_2341	99.86	731	1	0	1	731	1	731	0	1519
ESALQ_2372	MANIB_2340	98.85	783	9	0	1	783	1	783	0	1610
ESALQ_2373	MANIB_2339	99.48	384	2	0	1	384	1	384	0	791
ESALQ_2374	MANIB_2338	99.61	1016	4	0	1	1016	1	1016	0	2109
ESALQ_2375	MANIB_2337	99.17	483	4	0	1	483	1	483	0	980
ESALQ_2376	MANIB_2336	98.95	286	3	0	1	286	1	286	0	573
ESALQ_2377	MANIB_2335	99.04	627	6	0	1	627	37	663	0	1276
ESALQ_2378	MANIB_2334	100.00	395	0	0	1	395	182	576	0	805
ESALQ_2382	MANIB_2330	98.19	331	6	0	1	331	1	331	0	642
ESALQ_2383	MANIB_2329	99.88	840	1	0	1	840	1	840	0	1711
ESALQ_2384	MANIB_2328	99.21	1769	14	0	1	1769	1	1769	0	3607
ESALQ_2385	MANIB_2327	100.00	280	0	0	1	280	1	280	0	520
ESALQ_2386	MANIB_2326	100.00	319	0	0	1	319	1	319	0	657
ESALQ_2387	MANIB_2325	99.73	371	1	0	1	371	1	371	0	771
ESALQ_2388	MANIB_2324	97.19	605	17	0	1	605	1	605	0	1080
ESALQ_2389	MANIB_2323	100.00	349	0	0	1	349	146	494	0	724
ESALQ_2390	MANIB_2322	99.53	427	2	0	1	427	1	427	0	871
ESALQ_2392	MANIB_2320	97.43	350	9	0	1	350	1	350	0	713
ESALQ_2393	MANIB_2319	99.15	470	4	0	1	470	1	470	0	973
ESALQ_2396	MANIB_2317	98.60	1001	14	0	1	1001	1	1001	0	2011
ESALQ_2397	MANIB_2316	96.97	429	13	0	1	429	1	429	0	768
ESALQ_2399	MANIB_2314	99.82	560	1	0	1	560	1	560	0	1145
ESALQ_2400	MANIB_2313	98.07	623	12	0	1	623	1	623	0	1260
ESALQ_2401	MANIB_46	99.61	766	3	0	1	766	1	766	0	1575
ESALQ_2402	MANIB_2312	98.31	473	8	0	1	473	1	473	0	893
ESALQ_2403	MANIB_2311	99.63	537	2	0	1	537	1	537	0	1107
ESALQ_2404	MANIB_2310	99.41	339	1	1	1	339	1	338	0	696
ESALQ_2405	MANIB_2308	99.46	368	2	0	1	368	1	368	0	670
ESALQ_2409	MANIB_2304	97.10	414	9	1	1	411	1	414	0	816
ESALQ_2410	MANIB_2303	98.81	1592	19	0	1	1592	1	1592	0	3199
ESALQ_2411	MANIB_2302	98.43	762	12	0	1	762	1	762	0	1553
ESALQ_2414	MANIB_2299	99.77	433	1	0	1	433	1	433	0	897
ESALQ_2415	MANIB_2298	92.46	1035	21	2	12	1046	12	989	0	1923
ESALQ_2416	MANIB_2297	99.53	644	3	0	1	644	1	644	0	1316
ESALQ_2417	MANIB_2296	98.03	254	5	0	1	254	1	254	0	524
ESALQ_2418	MANIB_2295	99.65	858	3	0	1	858	1	858	0	1758
ESALQ_2420	MANIB_2293	99.62	788	3	0	1	788	1	788	0	1632
ESALQ_2422	MANIB_2291	99.42	516	3	0	1	516	1	516	0	1011
ESALQ_2423	MANIB_2290	94.07	708	29	2	1	695	41	748	0	1213
ESALQ_2424	MANIB_2289	99.62	532	2	0	1	532	1	532	0	1102
ESALQ_2425	MANIB_2288	100.00	459	0	0	1	459	1	459	0	959
ESALQ_2426	MANIB_2287	99.33	298	2	0	1	298	1	298	0	607
ESALQ_2428	MANIB_2285	100.00	353	0	0	1	353	1	353	0	719
ESALQ_2429	MANIB_2284	100.00	439	0	0	1	439	1	439	0	900
ESALQ_2430	MANIB_2283	99.66	583	2	0	1	583	1	583	0	1197
ESALQ_2431	MANIB_2282	100.00	358	0	0	1	358	1	358	0	741
ESALQ_2432	MANIB_2281	99.28	697	5	0	1	697	1	697	0	1419
ESALQ_2433	MANIB_2280	98.08	574	11	0	1	574	1	574	0	1135
ESALQ_2434	MANIB_2279	99.15	587	5	0	1	587	1	587	0	1183
ESALQ_2435	MANIB_2278	99.13	574	5	0	1	574	1	574	0	1178
ESALQ_2436	MANIB_2277	98.56	348	5	0	1	348	1	348	0	694
ESALQ_2437	MANIB_2276	99.63	268	1	0	1	268	1	268	0	526
ESALQ_2438	MANIB_2275	99.37	630	4	0	40	669	56	685	0	1292
ESALQ_2439	MANIB_2274	97.19	427	12	0	1	427	1	427	0	852
ESALQ_2440	MANIB_2272	99.81	531	1	0	1	531	1	531	0	1075
ESALQ_2442	MANIB_2270	99.65	849	2	1	1	848	1	849	0	1694
ESALQ_2443	MANIB_2269	98.73	394	5	0	1	394	1	394	0	797
ESALQ_2444	MANIB_2268	98.78	985	12	0	1	985	1	985	0	1998
ESALQ_2446	MANIB_2266	99.67	299	1	0	1	299	1	299	0	597
ESALQ_2449	MANIB_2263	98.46	324	5	0	24	347	55	378	0	664
ESALQ_2450	MANIB_2262	99.70	330	1	0	1	330	1	330	0	664
ESALQ_2451	MANIB_2261	98.41	251	4	0	1	251	1	251	0	512
ESALQ_2453	MANIB_2259	98.53	746	11	0	1	746	1	746	0	1496
ESALQ_2455	MANIB_2257	91.11	315	4	1	1	315	1	291	0	582
ESALQ_2456	MANIB_2256	98.03	456	0	1	1	456	1	447	0	905
ESALQ_2458	MANIB_2253	96.15	286	11	0	1	286	1	286	0	561
ESALQ_2459	MANIB_2252	96.10	1180	5	1	1	1180	1	1139	0	2313
ESALQ_2460	MANIB_2251	94.27	471	4	2	1	465	1	454	0	906
ESALQ_2461	MANIB_2250	100.00	575	0	0	1	575	1	575	0	1162
ESALQ_2463	MANIB_2248	99.02	410	4	0	1	410	1	410	0	835
ESALQ_2464	MANIB_2247	99.13	1143	10	0	1	1143	1	1143	0	2300
ESALQ_2465	MANIB_2246	93.43	1080	26	3	1	1039	1	1076	0	2080
ESALQ_2466	MANIB_2245	99.79	469	1	0	1	469	1	469	0	966
ESALQ_2467	MANIB_2244	100.00	428	0	0	1	428	1	428	0	889
ESALQ_2468	MANIB_2243	96.44	337	6	1	1	331	1	337	0	644
ESALQ_2469	MANIB_2242	98.97	292	3	0	1	292	1	292	0	597
ESALQ_2470	MANIB_2241	99.57	698	3	0	1	698	1	698	0	1432
ESALQ_2471	MANIB_2240	99.43	701	4	0	1	701	1	701	0	1438
ESALQ_2473	MANIB_2238	99.76	410	1	0	1	410	1	410	0	858
ESALQ_2474	MANIB_2237	100.00	345	0	0	1	345	1	345	0	708
ESALQ_2475	MANIB_2236	100.00	269	0	0	1	269	108	376	0	553
ESALQ_2476	MANIB_2235	99.59	723	3	0	1	723	122	844	0	1449
ESALQ_2478	MANIB_2234	98.85	261	3	0	1	261	1	261	0	523
ESALQ_2480	MANIB_2232	98.94	282	3	0	1	282	1	282	0	565
ESALQ_2481	MANIB_2231	96.69	574	14	1	1	574	1	569	0	1206
ESALQ_2482	MANIB_2230	90.97	487	15	3	1	480	1	465	0	874
ESALQ_2483	MANIB_2229	99.29	424	3	0	1	424	1	424	0	857
ESALQ_2484	MANIB_2227	97.94	291	6	0	1	291	1	291	0	593
ESALQ_2485	MANIB_2226	99.48	773	4	0	1	773	1	773	0	1591
ESALQ_2486	MANIB_2225	100.00	512	0	0	1	512	1	512	0	1066
ESALQ_2487	MANIB_2224	99.73	369	1	0	1	369	1	369	0	759
ESALQ_2488	MANIB_2223	99.91	1071	1	0	1	1071	1	1071	0	2216
ESALQ_2489	MANIB_2221	98.23	1692	16	1	574	2265	76	1753	0	3399
ESALQ_2490	MANIB_2220	99.54	1530	7	0	1	1530	1	1530	0	3132
ESALQ_2491	MANIB_2219	99.15	828	4	1	1	828	1	825	0	1707
ESALQ_2492	MANIB_2218	99.25	1327	10	0	84	1410	1	1327	0	2715
ESALQ_2495	MANIB_2215	99.63	815	3	0	1	815	1	815	0	1682
ESALQ_2496	MANIB_2214	97.67	514	5	1	1	507	1	514	0	1027
ESALQ_2497	MANIB_2213	99.38	975	3	1	1	975	1	972	0	2027
ESALQ_2498	MANIB_2212	99.78	1387	3	0	1	1387	1	1387	0	2855
ESALQ_2499	MANIB_2211	100.00	463	0	0	1	463	1	463	0	959
ESALQ_2500	MANIB_2210	99.29	283	2	0	1	283	1	283	0	576
ESALQ_2501	MANIB_2209	98.93	839	9	0	1	839	1	839	0	1692
ESALQ_2502	MANIB_2208	99.33	298	2	0	1	298	1	298	0	616
ESALQ_2504	MANIB_2206	99.10	333	3	0	1	333	1	333	0	688
ESALQ_2506	MANIB_2204	99.16	598	5	0	1	598	1	598	0	1231
ESALQ_2507	MANIB_2203	99.42	521	3	0	1	521	1	521	0	1071
ESALQ_2508	MANIB_2202	99.27	273	2	0	1	273	1	273	0	546
ESALQ_2509	MANIB_2201	99.48	388	2	0	39	426	1	388	0	802
ESALQ_2510	MANIB_2200	98.80	498	6	0	91	588	1	498	0	1019
ESALQ_2511	MANIB_2199	99.13	804	7	0	1	804	1	804	0	1672
ESALQ_2512	MANIB_2198	99.02	614	4	1	1	614	1	612	0	1174
ESALQ_2513	MANIB_2197	99.69	326	1	0	1	326	1	326	0	664
ESALQ_2514	MANIB_2196	99.29	708	5	0	1	708	1	708	0	1457
ESALQ_2515	MANIB_2195	98.97	390	4	0	1	390	1	390	0	784
ESALQ_2516	MANIB_2194	99.35	464	2	1	1	463	1	464	0	951
ESALQ_2518	MANIB_2192	94.45	937	43	3	1	928	1	937	0	1820
ESALQ_2519	MANIB_2191	98.03	508	3	1	1	501	1	508	0	1031
ESALQ_2520	MANIB_2190	99.37	319	1	1	1	319	1	318	0	654
ESALQ_2521	MANIB_2189	99.31	434	3	0	1	434	1	434	0	898
ESALQ_2522	MANIB_2188	99.79	936	2	0	1	936	1	936	0	1939
ESALQ_2523	MANIB_2187	95.70	1326	6	1	1	1275	1	1326	0	2525
ESALQ_2525	MANIB_2185	98.46	259	4	0	1	259	1	259	0	520
ESALQ_2526	MANIB_2184	100.00	688	0	0	1	688	1	688	0	1424
ESALQ_2527	MANIB_2183	99.30	429	3	0	1	429	8	436	0	856
ESALQ_2528	MANIB_2182	83.06	490	43	7	1	489	1	451	0	788
ESALQ_2529	MANIB_2181	99.55	1543	7	0	1	1543	1	1543	0	3198
ESALQ_2530	MANIB_2180	93.57	1026	15	1	1	975	1	1026	0	1975
ESALQ_2531	MANIB_2179	99.83	573	1	0	1	573	1	573	0	1185
ESALQ_2533	MANIB_2177	99.27	275	2	0	1	275	1	275	0	552
ESALQ_2534	MANIB_2176	89.49	333	26	2	1	329	1	328	0	556
ESALQ_2535	MANIB_2175	100.00	333	0	0	1	333	1	333	0	645
ESALQ_2536	MANIB_2174	94.09	558	7	1	1	532	1	558	0	1043
ESALQ_2538	MANIB_2172	99.17	361	3	0	1	361	1	361	0	709
ESALQ_2539	MANIB_2171	99.66	885	3	0	970	1854	842	1726	0	1851
ESALQ_2540	MANIB_2170	99.78	458	1	0	1	458	1	458	0	923
ESALQ_2541	MANIB_2169	97.12	799	0	1	41	816	1	799	0	1600
ESALQ_2543	MANIB_2167	100.00	280	0	0	1	280	1	280	0	568
ESALQ_2545	MANIB_2165	98.51	538	8	0	1	538	1	538	0	1094
ESALQ_2546	MANIB_2164	91.45	924	37	6	1	923	1	883	0	1699
ESALQ_2548	MANIB_2161	98.43	891	4	1	1	881	1	891	0	1815
ESALQ_2549	MANIB_2160	81.04	654	66	4	1	599	1	651	0	1047
ESALQ_2551	MANIB_2158	99.84	628	1	0	1	628	1	628	0	1303
ESALQ_2552	MANIB_2157	98.67	1055	14	0	1	1055	1	1055	0	2093
ESALQ_2553	MANIB_2156	99.82	561	1	0	1	561	1	561	0	1148
ESALQ_2554	MANIB_2155	98.84	1037	12	0	1	1037	1	1037	0	2080
ESALQ_2555	MANIB_2154	97.55	1468	10	1	1	1468	1	1442	0	2871
ESALQ_2557	MANIB_2152	99.64	822	3	0	1	822	88	909	0	1648
ESALQ_2558	MANIB_2151	99.43	352	2	0	1	352	25	376	0	717
ESALQ_2559	MANIB_2150	99.31	576	4	0	1	576	1	576	0	1148
ESALQ_2560	MANIB_2149	95.73	749	11	1	1	749	1	728	0	1472
ESALQ_2561	MANIB_2148	95.26	443	13	1	1	443	1	435	0	862
ESALQ_2562	MANIB_2147	99.35	460	3	0	167	626	1	460	0	959
ESALQ_2563	MANIB_2146	97.40	269	7	0	1	269	1	269	0	546
ESALQ_2564	MANIB_2145	99.61	254	1	0	1	254	1	254	0	515
ESALQ_2565	MANIB_2143	99.23	391	3	0	1	391	1	391	0	803
ESALQ_2566	MANIB_2142	98.48	264	4	0	1	264	1	264	0	525
ESALQ_2567	MANIB_1	83.12	308	6	1	6	267	5	312	0	504
ESALQ_2570	MANIB_4	99.81	514	1	0	1	514	1	514	0	1057
ESALQ_2571	MANIB_5	99.25	802	6	0	1	802	1	802	0	1605
ESALQ_2573	MANIB_7	97.61	795	11	1	1	787	1	795	0	1585
ESALQ_2574	MANIB_8	98.91	275	3	0	1	275	1	275	0	550
ESALQ_2575	MANIB_9	98.31	354	6	0	56	409	1	354	0	717
ESALQ_2577	MANIB_11	96.87	735	23	0	1	735	1	735	0	1488
ESALQ_2580	MANIB_14	98.64	367	5	0	1	367	1	367	0	716
ESALQ_2581	MANIB_15	97.83	277	6	0	1	277	1	277	0	564
ESALQ_2582	MANIB_16	97.41	502	13	0	1	502	1	502	0	1007
ESALQ_2584	MANIB_17	98.56	696	10	0	1	696	1	696	0	1424
ESALQ_2586	MANIB_19	100.00	535	0	0	1	535	1	535	0	1078
ESALQ_2587	MANIB_20	98.42	380	6	0	1	380	1	380	0	780
ESALQ_2588	MANIB_21	99.26	539	4	0	1	539	1	539	0	1108
ESALQ_2591	MANIB_24	93.96	364	22	0	1	364	1	364	0	681
ESALQ_2592	MANIB_25	98.98	781	8	0	5	785	35	815	0	1595
ESALQ_2593	MANIB_26	99.18	489	4	0	1	489	1	489	0	999
ESALQ_2594	MANIB_27	98.83	257	3	0	1	257	78	334	0	522
ESALQ_2595	MANIB_28	99.76	424	1	0	1	424	1	424	0	866
ESALQ_2596	MANIB_29	100.00	353	0	0	1	353	1	353	0	732
ESALQ_2601	MANIB_31	83.20	387	16	4	1	352	1	373	0	597
ESALQ_2602	MANIB_32	98.32	655	2	1	1	655	515	1160	0	1334
ESALQ_2603	MANIB_32	96.03	504	16	2	1	503	1	501	0	980
ESALQ_2604	MANIB_33	99.58	471	2	0	1	471	1	471	0	969
ESALQ_2605	MANIB_34	99.81	526	1	0	1	526	1	526	0	1094
ESALQ_2606	MANIB_35	99.84	626	1	0	1	626	1	626	0	1235
ESALQ_2608	MANIB_37	99.11	783	7	0	1	783	1	783	0	1582
ESALQ_2609	MANIB_38	93.84	487	1	1	1	487	1	458	0	906
ESALQ_2610	MANIB_39	98.40	313	5	0	1	313	1	313	0	643
ESALQ_2611	MANIB_40	97.74	1285	29	0	1	1285	1	1285	0	2486
ESALQ_2612	MANIB_41	100.00	537	0	0	1	537	1	537	0	1118
ESALQ_2613	MANIB_42	99.52	627	2	1	1	626	1	627	0	1269
ESALQ_2614	MANIB_43	99.61	769	3	0	1	769	1	769	0	1598
ESALQ_2615	MANIB_44	97.23	325	8	1	1	324	39	363	0	630
ESALQ_2616	MANIB_45	96.97	264	8	0	4	267	156	419	0	516
ESALQ_2617	MANIB_47	73.06	787	127	11	1	706	1	783	0	977
ESALQ_2618	MANIB_48	99.41	683	4	0	1	683	1	683	0	1400
ESALQ_2622	MANIB_51	93.70	667	26	2	1	667	1	651	0	1207
ESALQ_2624	MANIB_53	97.91	621	13	0	1	621	1	621	0	1251
ESALQ_2626	MANIB_55	99.38	645	4	0	1	645	1	645	0	1307
ESALQ_2628	MANIB_57	98.28	408	7	0	1	408	1	408	0	807
ESALQ_2629	MANIB_58	99.67	301	1	0	1	301	1	301	0	612
ESALQ_2630	MANIB_59	99.40	502	3	0	1	502	1	502	0	1017
ESALQ_2632	MANIB_61	99.56	454	2	0	1	454	1	454	0	936
ESALQ_2633	MANIB_62	99.34	457	3	0	1	457	73	529	0	946
ESALQ_2635	MANIB_64	99.22	641	5	0	1	641	1	641	0	1333
ESALQ_2636	MANIB_65	97.93	531	9	1	1	529	1	531	0	1083
ESALQ_2637	MANIB_66	98.48	660	10	0	1	660	1	660	0	1345
ESALQ_2638	MANIB_67	97.39	422	2	1	1	422	1	413	0	803
ESALQ_2639	MANIB_68	96.25	320	12	0	1	320	1	320	0	604
ESALQ_2640	MANIB_69	100.00	562	0	0	1	562	1	562	0	1148
ESALQ_2641	MANIB_70	99.60	756	3	0	1	756	1	756	0	1494
ESALQ_2642	MANIB_72	98.85	783	9	0	70	852	19	801	0	1608
ESALQ_2643	MANIB_73	99.52	420	2	0	1	420	1	420	0	866
ESALQ_2644	MANIB_74	98.91	275	2	1	1	274	1	275	0	546
ESALQ_2645	MANIB_75	97.96	539	11	0	1	539	1	539	0	1115
ESALQ_2646	MANIB_76	99.18	489	4	0	1	489	1	489	0	994
ESALQ_2648	MANIB_78	99.04	1567	15	0	1	1567	1	1567	0	3224
ESALQ_2649	MANIB_79	98.36	548	9	0	1	548	1	548	0	1108
ESALQ_2650	MANIB_80	98.35	424	7	0	1	424	1	424	0	838
ESALQ_2651	MANIB_81	99.22	258	2	0	1	258	1	258	0	525
ESALQ_2653	MANIB_83	98.40	563	9	0	1	563	1	563	0	1145
ESALQ_2655	MANIB_85	99.32	294	2	0	1	294	1	294	0	585
ESALQ_2657	MANIB_87	98.14	322	5	1	1	321	1	322	0	647
ESALQ_2659	MANIB_89	98.58	493	6	1	1	492	1	493	0	973
ESALQ_2660	MANIB_90	92.51	467	35	0	1	467	1	467	0	894
ESALQ_2661	MANIB_91	99.04	312	3	0	1	312	1	312	0	653
[truncated: 8,631 more rows]

## Sheet: BLASTp_MANIB_ESALQ
Query_ManiB	Target_1638	pident	length	mismatch	gapopen	qstart	qend	sstart	send	evalue	bitscore
MANIB_1	ESALQ_2567	83.12	308	6	1	5	312	6	267	0	505
MANIB_4	ESALQ_2570	99.81	514	1	0	1	514	1	514	0	1057
MANIB_5	ESALQ_2571	99.25	802	6	0	1	802	1	802	0	1605
MANIB_7	ESALQ_2573	97.61	795	11	1	1	795	1	787	0	1585
MANIB_8	ESALQ_2574	98.91	275	3	0	1	275	1	275	0	550
MANIB_9	ESALQ_2575	98.31	354	6	0	1	354	56	409	0	717
MANIB_11	ESALQ_2577	96.87	735	23	0	1	735	1	735	0	1488
MANIB_14	ESALQ_2580	98.64	367	5	0	1	367	1	367	0	716
MANIB_15	ESALQ_2581	97.83	277	6	0	1	277	1	277	0	564
MANIB_16	ESALQ_2582	97.41	502	13	0	1	502	1	502	0	1007
MANIB_17	ESALQ_2584	98.56	696	10	0	1	696	1	696	0	1424
MANIB_19	ESALQ_2586	100.00	535	0	0	1	535	1	535	0	1078
MANIB_20	ESALQ_2587	98.42	380	6	0	1	380	1	380	0	780
MANIB_21	ESALQ_2588	99.26	539	4	0	1	539	1	539	0	1108
MANIB_22	ESALQ_2589	81.42	296	55	0	30	325	1	296	0	505
MANIB_24	ESALQ_2591	93.96	364	22	0	1	364	1	364	0	703
MANIB_25	ESALQ_2592	98.98	781	8	0	35	815	5	785	0	1595
MANIB_26	ESALQ_2593	99.18	489	4	0	1	489	1	489	0	999
MANIB_27	ESALQ_2594	98.83	257	3	0	78	334	1	257	0	522
MANIB_28	ESALQ_2595	99.76	424	1	0	1	424	1	424	0	866
MANIB_29	ESALQ_2596	100.00	353	0	0	1	353	1	353	0	732
MANIB_31	ESALQ_2601	83.20	387	16	4	1	373	1	352	0	583
MANIB_32	ESALQ_2602	98.32	655	2	1	515	1160	1	655	0	1334
MANIB_33	ESALQ_2604	99.58	471	2	0	1	471	1	471	0	969
MANIB_34	ESALQ_2605	99.81	526	1	0	1	526	1	526	0	1094
MANIB_35	ESALQ_2606	99.84	626	1	0	1	626	1	626	0	1235
MANIB_37	ESALQ_2608	99.11	783	7	0	1	783	1	783	0	1582
MANIB_38	ESALQ_2609	93.84	487	1	1	1	458	1	487	0	906
MANIB_39	ESALQ_2610	98.40	313	5	0	1	313	1	313	0	643
MANIB_40	ESALQ_2611	97.74	1285	29	0	1	1285	1	1285	0	2486
MANIB_41	ESALQ_2612	100.00	537	0	0	1	537	1	537	0	1118
MANIB_42	ESALQ_2613	99.52	627	2	1	1	627	1	626	0	1269
MANIB_43	ESALQ_2614	99.61	769	3	0	1	769	1	769	0	1598
MANIB_44	ESALQ_2615	97.23	325	8	1	39	363	1	324	0	630
MANIB_45	ESALQ_2616	96.97	264	8	0	156	419	4	267	0	516
MANIB_46	ESALQ_2401	99.61	766	3	0	1	766	1	766	0	1575
MANIB_47	ESALQ_2617	84.80	783	42	4	1	783	1	706	0	1135
MANIB_48	ESALQ_2618	99.41	683	4	0	1	683	1	683	0	1400
MANIB_51	ESALQ_2622	94.15	667	23	2	1	651	1	667	0	1216
MANIB_53	ESALQ_2624	97.91	621	13	0	1	621	1	621	0	1251
MANIB_55	ESALQ_2626	99.38	645	4	0	1	645	1	645	0	1307
MANIB_57	ESALQ_2628	98.28	408	7	0	1	408	1	408	0	807
MANIB_58	ESALQ_2629	99.67	301	1	0	1	301	1	301	0	612
MANIB_59	ESALQ_2630	99.40	502	3	0	1	502	1	502	0	1017
MANIB_61	ESALQ_2632	99.56	454	2	0	1	454	1	454	0	936
MANIB_62	ESALQ_2633	99.34	457	3	0	73	529	1	457	0	946
MANIB_64	ESALQ_2635	99.22	641	5	0	1	641	1	641	0	1333
MANIB_65	ESALQ_2636	97.93	531	9	1	1	531	1	529	0	1083
MANIB_66	ESALQ_2637	98.48	660	10	0	1	660	1	660	0	1345
MANIB_67	ESALQ_2638	97.39	422	2	1	1	413	1	422	0	803
MANIB_68	ESALQ_2639	96.25	320	12	0	1	320	1	320	0	587
MANIB_69	ESALQ_2640	100.00	562	0	0	1	562	1	562	0	1148
MANIB_70	ESALQ_2641	99.60	756	3	0	1	756	1	756	0	1494
MANIB_72	ESALQ_2642	98.85	783	9	0	19	801	70	852	0	1608
MANIB_73	ESALQ_2643	99.52	420	2	0	1	420	1	420	0	866
MANIB_74	ESALQ_2644	98.91	275	2	1	1	275	1	274	0	546
MANIB_75	ESALQ_2645	97.96	539	11	0	1	539	1	539	0	1115
MANIB_76	ESALQ_2646	99.18	489	4	0	1	489	1	489	0	994
MANIB_78	ESALQ_2648	99.04	1567	15	0	1	1567	1	1567	0	3224
MANIB_79	ESALQ_2649	98.36	548	9	0	1	548	1	548	0	1108
MANIB_80	ESALQ_2650	98.35	424	7	0	1	424	1	424	0	838
MANIB_81	ESALQ_2651	99.22	258	2	0	1	258	1	258	0	525
MANIB_83	ESALQ_2653	98.40	563	9	0	1	563	1	563	0	1145
MANIB_85	ESALQ_2655	99.32	294	2	0	1	294	1	294	0	585
MANIB_87	ESALQ_2657	98.14	322	5	1	1	322	1	321	0	647
MANIB_89	ESALQ_2659	98.58	493	6	1	1	493	1	492	0	973
MANIB_90	ESALQ_2660	92.51	467	35	0	1	467	1	467	0	894
MANIB_91	ESALQ_2661	99.04	312	3	0	1	312	1	312	0	653
MANIB_92	ESALQ_2662	99.44	360	2	0	1	360	1	360	0	740
MANIB_93	ESALQ_2663	99.83	589	1	0	1	589	1	589	0	1193
MANIB_95	ESALQ_2665	99.26	1077	8	0	1	1077	1	1077	0	2198
MANIB_96	ESALQ_2666	99.52	630	3	0	205	834	1	630	0	1254
MANIB_98	ESALQ_2668	99.60	248	1	0	400	647	30	277	0	525
MANIB_99	ESALQ_2669	98.57	350	5	0	1	350	1	350	0	721
MANIB_100	ESALQ_2670	96.63	297	10	0	1	297	1	297	0	589
MANIB_101	ESALQ_2671	97.43	855	22	0	1	855	1	855	0	1728
MANIB_102	ESALQ_2672	97.70	522	12	0	1	522	1	522	0	1070
MANIB_103	ESALQ_2673	99.48	580	3	0	1	580	1	580	0	1176
MANIB_106	ESALQ_2676	96.20	527	20	0	1	527	1	527	0	994
MANIB_107	ESALQ_2677	98.39	496	8	0	1	496	1	496	0	979
MANIB_108	ESALQ_2678	95.41	392	4	1	1	378	1	392	0	761
MANIB_109	ESALQ_2679	95.70	349	15	0	1	349	160	508	0	688
MANIB_112	ESALQ_2681	98.61	574	8	0	1	574	1	574	0	1169
MANIB_113	ESALQ_2682	98.66	968	13	0	1	968	1	968	0	1987
MANIB_117	ESALQ_2685	99.17	606	5	0	1	606	1	606	0	1254
MANIB_119	ESALQ_2687	99.01	1725	8	1	1	1716	1	1725	0	3539
MANIB_120	ESALQ_2688	85.59	708	35	6	1	707	1	642	0	1205
MANIB_122	ESALQ_2690	79.31	522	71	6	34	530	1	510	0	769
MANIB_123	ESALQ_2691	99.48	767	4	0	1	767	1	767	0	1565
MANIB_124	ESALQ_2692	98.19	386	7	0	1	386	1	386	0	774
MANIB_125	ESALQ_2694	98.82	1098	13	0	1	1098	1	1098	0	2239
MANIB_126	ESALQ_2695	98.74	397	5	0	24	420	31	427	0	801
MANIB_129	ESALQ_2698	98.87	530	6	0	1	530	120	649	0	1073
MANIB_130	ESALQ_2700	99.32	584	4	0	1	584	1	584	0	1215
MANIB_131	ESALQ_2701	97.34	413	7	2	1	413	1	409	0	823
MANIB_132	ESALQ_2702	99.05	1363	6	1	1	1356	1	1363	0	2782
MANIB_134	ESALQ_2704	98.76	809	7	1	1	806	1	809	0	1580
MANIB_135	ESALQ_2705	99.17	484	4	0	1	484	1	484	0	981
MANIB_137	ESALQ_2707	99.73	1098	3	0	1	1098	1	1098	0	2250
MANIB_139	ESALQ_2708	98.87	529	6	0	1	529	1	529	0	1082
MANIB_140	ESALQ_2709	99.33	898	5	1	1	897	1	898	0	1759
MANIB_142	ESALQ_2711	90.20	398	14	2	1	373	1	398	0	717
MANIB_144	ESALQ_2713	99.71	347	1	0	1	347	1	347	0	721
MANIB_145	ESALQ_2715	99.78	453	1	0	1	453	1	453	0	942
MANIB_147	ESALQ_2717	98.33	657	8	2	1	654	1	657	0	1312
MANIB_148	ESALQ_2718	97.74	665	15	0	1	665	1	665	0	1337
MANIB_150	ESALQ_2719	98.89	813	9	0	1	813	1	813	0	1671
MANIB_153	ESALQ_2723	99.09	439	4	0	305	743	1	439	0	870
MANIB_154	ESALQ_2724	100.00	363	0	0	1	363	1	363	0	746
MANIB_155	ESALQ_2725	96.97	726	14	1	1	718	1	726	0	1456
MANIB_158	ESALQ_2728	98.58	282	4	0	1	282	1	282	0	550
MANIB_159	ESALQ_2729	93.86	407	0	1	1	407	1	382	0	770
MANIB_160	ESALQ_2730	99.62	526	2	0	1	526	1	526	0	1084
MANIB_161	ESALQ_2731	98.30	588	10	0	1	588	1	588	0	1200
MANIB_162	ESALQ_2732	99.65	283	1	0	1	283	1	283	0	571
MANIB_164	ESALQ_2734	97.08	479	14	0	123	601	1	479	0	952
MANIB_165	ESALQ_2735	100.00	245	0	0	1	245	1	245	0	505
MANIB_169	ESALQ_2740	100.00	301	0	0	1	301	1	301	0	599
MANIB_170	ESALQ_2741	99.64	1378	5	0	1	1378	1	1378	0	2838
MANIB_171	ESALQ_2742	99.07	642	4	1	1	642	1	640	0	1316
MANIB_172	ESALQ_2744	99.48	387	2	0	1	387	543	929	0	793
MANIB_173	ESALQ_2744	99.79	486	1	0	1	486	1	486	0	991
MANIB_175	ESALQ_2746	99.42	347	2	0	1	347	1	347	0	677
MANIB_176	ESALQ_2747	99.63	534	2	0	1	534	1	534	0	1110
MANIB_177	ESALQ_2748	99.03	413	4	0	1	413	1	413	0	847
MANIB_179	ESALQ_2750	95.25	611	28	1	1	611	1	610	0	1169
MANIB_180	ESALQ_396	86.70	361	5	2	1	361	1	318	0	625
MANIB_181	ESALQ_395	99.80	509	1	0	1	509	1	509	0	1030
MANIB_182	ESALQ_394	96.15	390	11	2	1	386	1	390	0	680
MANIB_183	ESALQ_393	99.50	403	2	0	1	403	1	403	0	811
MANIB_184	ESALQ_392	98.72	312	4	0	1	312	1	312	0	633
MANIB_185	ESALQ_391	99.77	2141	5	0	1	2141	1	2141	0	4395
MANIB_186	ESALQ_390	99.53	860	4	0	1	860	1	860	0	1767
MANIB_187	ESALQ_389	97.16	352	7	1	1	349	1	352	0	716
MANIB_188	ESALQ_388	98.69	381	5	0	1	381	1	381	0	777
MANIB_190	ESALQ_386	97.19	1104	30	1	1	1104	93	1195	0	2211
MANIB_191	ESALQ_385	99.21	629	5	0	1	629	1	629	0	1267
MANIB_192	ESALQ_384	99.36	941	6	0	1	941	1	941	0	1878
MANIB_193	ESALQ_383	98.74	1592	20	0	1	1592	1	1592	0	3251
MANIB_194	ESALQ_382	99.34	302	2	0	1	302	1	302	0	619
MANIB_195	ESALQ_381	100.00	552	0	0	1	552	1	552	0	1106
MANIB_197	ESALQ_379	98.89	2071	22	1	1	2071	1	2070	0	4157
MANIB_198	ESALQ_378	97.63	1096	21	1	7	1097	1	1096	0	2145
MANIB_199	ESALQ_377	98.58	282	4	0	112	393	1	282	0	578
MANIB_200	ESALQ_376	99.62	262	1	0	1	262	1	262	0	526
MANIB_201	ESALQ_375	99.72	358	1	0	1	358	1	358	0	728
MANIB_202	ESALQ_374	90.54	539	38	3	1	538	1	527	0	974
MANIB_203	ESALQ_373	94.04	554	4	1	1	554	1	525	0	1058
MANIB_204	ESALQ_372	93.51	663	3	1	1	623	1	663	0	1276
MANIB_205	ESALQ_371	96.68	722	4	1	1	722	1	702	0	1430
MANIB_206	ESALQ_370	95.79	380	16	0	463	842	339	718	0	631
MANIB_207	ESALQ_369	97.66	342	8	0	1	342	1	342	0	692
MANIB_208	ESALQ_368	84.55	343	1	1	1	291	1	343	0	578
MANIB_209	ESALQ_367	94.58	1033	2	2	1	1033	1	979	0	2008
MANIB_211	ESALQ_365	99.73	736	2	0	1	736	40	775	0	1505
MANIB_212	ESALQ_364	100.00	352	0	0	1	352	1	352	0	728
MANIB_213	ESALQ_363	99.46	1468	8	0	1	1468	1	1468	0	3008
MANIB_214	ESALQ_362	99.32	1607	11	0	1	1607	1	1607	0	3276
MANIB_215	ESALQ_361	96.69	815	26	1	1	815	1	814	0	1607
MANIB_216	ESALQ_360	100.00	333	0	0	1	333	1	333	0	671
MANIB_218	ESALQ_358	96.85	445	13	1	1	444	1	445	0	857
MANIB_219	ESALQ_357	96.60	530	18	0	1	530	1	530	0	1065
MANIB_220	ESALQ_356	88.61	553	63	0	1	553	1	553	0	854
MANIB_221	ESALQ_355	99.39	327	2	0	1	327	1	327	0	674
MANIB_222	ESALQ_354	98.24	737	12	1	1	737	1	736	0	1488
MANIB_223	ESALQ_353	95.33	578	23	2	1	574	303	880	0	1087
MANIB_226	ESALQ_352	99.64	275	1	0	1	275	1	275	0	561
MANIB_228	ESALQ_350	85.45	433	9	2	1	379	1	433	0	732
MANIB_229	ESALQ_349	99.48	769	4	0	1	769	1	769	0	1607
MANIB_230	ESALQ_348	98.98	488	5	0	1	488	1	488	0	1001
MANIB_231	ESALQ_347	98.06	309	6	0	131	439	1	309	0	639
MANIB_233	ESALQ_346	97.37	266	7	0	1	266	246	511	0	537
MANIB_234	ESALQ_345	98.08	468	7	1	1	466	1	468	0	948
MANIB_235	ESALQ_344	90.57	297	16	1	1	285	1	297	0	539
MANIB_237	ESALQ_343	99.50	402	2	0	1	402	1	402	0	776
MANIB_241	ESALQ_339	95.10	612	26	1	1	608	1	612	0	1201
MANIB_242	ESALQ_338	90.76	357	33	0	19	375	19	375	0	661
MANIB_243	ESALQ_337	89.51	515	1	1	1	462	1	515	0	922
MANIB_245	ESALQ_335	91.46	316	1	1	1	290	1	316	0	567
MANIB_248	ESALQ_332	86.44	686	27	3	1	620	1	686	0	1142
MANIB_249	ESALQ_331	99.16	479	4	0	1	479	1	479	0	973
MANIB_251	ESALQ_329	95.57	497	15	2	1	496	1	491	0	956
MANIB_252	ESALQ_328	98.72	1646	17	1	1	1646	1	1642	0	3385
MANIB_253	ESALQ_327	99.38	646	4	0	1	646	1	646	0	1323
MANIB_254	ESALQ_326	97.94	486	10	0	1	486	1	486	0	998
MANIB_255	ESALQ_325	99.81	515	1	0	1	515	1	515	0	1051
MANIB_256	ESALQ_324	98.34	361	6	0	1	361	1	361	0	734
MANIB_257	ESALQ_323	99.82	556	1	0	1	556	1	556	0	1125
MANIB_258	ESALQ_322	88.96	326	9	1	253	578	4	302	0	582
MANIB_259	ESALQ_319	98.91	457	5	0	1	457	1	457	0	937
MANIB_261	ESALQ_317	98.76	644	8	0	1	644	1	644	0	1274
MANIB_265	ESALQ_314	94.29	701	5	1	160	860	99	764	0	1329
MANIB_267	ESALQ_313	96.92	389	12	0	1	389	457	845	0	768
MANIB_269	ESALQ_313	99.46	372	2	0	1	372	1	372	0	764
MANIB_270	ESALQ_312	98.95	476	5	0	5	480	4	479	0	971
MANIB_271	ESALQ_311	99.29	283	2	0	1	283	1	283	0	566
MANIB_272	ESALQ_310	91.25	297	3	2	1	275	1	296	0	536
MANIB_273	ESALQ_309	97.18	673	19	0	1	673	1	673	0	1326
MANIB_275	ESALQ_307	77.27	673	85	10	1	609	1	669	0	975
MANIB_277	ESALQ_305	96.53	288	6	1	1	284	1	288	0	538
MANIB_278	ESALQ_304	99.15	353	3	0	1	353	1	353	0	713
MANIB_280	ESALQ_302	93.52	432	28	0	51	482	4	435	0	830
MANIB_281	ESALQ_301	99.30	428	2	1	1	427	1	428	0	804
MANIB_282	ESALQ_300	96.38	304	6	1	1	304	1	299	0	602
MANIB_283	ESALQ_299	95.83	288	7	1	1	283	1	288	0	545
MANIB_286	ESALQ_297	93.98	415	20	1	1	410	1	415	0	763
MANIB_288	ESALQ_295	99.50	400	2	0	1	400	1	400	0	825
MANIB_289	ESALQ_294	87.44	454	33	2	1	431	1	453	0	757
MANIB_290	ESALQ_293	98.02	1514	22	2	9	1520	1	1508	0	3058
MANIB_291	ESALQ_293	98.85	349	4	0	3	351	1483	1831	0	712
MANIB_292	ESALQ_292	97.28	405	11	0	1	405	1	405	0	806
MANIB_293	ESALQ_291	87.03	532	10	4	1	473	1	532	0	911
MANIB_295	ESALQ_289	99.77	432	1	0	59	490	4	435	0	882
MANIB_298	ESALQ_286	78.78	839	102	9	1	763	1	839	0	957
MANIB_299	ESALQ_285	98.34	1142	19	0	1	1142	1	1142	0	2260
MANIB_301	ESALQ_283	98.27	577	9	1	1	577	1	576	0	1151
MANIB_302	ESALQ_281	98.08	731	14	0	1	731	1	731	0	1489
MANIB_304	ESALQ_279	98.63	1019	14	0	1	1019	1	1019	0	2016
MANIB_305	ESALQ_278	97.93	435	9	0	1	435	1	435	0	878
MANIB_306	ESALQ_277	99.54	1510	6	1	1	1510	1	1509	0	3132
MANIB_307	ESALQ_276	98.29	527	6	1	1	524	1	527	0	1035
MANIB_308	ESALQ_275	99.62	265	1	0	1	265	1	265	0	546
MANIB_309	ESALQ_274	99.52	421	2	0	1	421	1	421	0	865
MANIB_310	ESALQ_273	92.00	550	18	2	1	550	1	524	0	964
MANIB_311	ESALQ_272	98.28	814	14	0	1	814	1	814	0	1634
MANIB_312	ESALQ_271	96.32	543	20	0	1	543	1	543	0	1056
MANIB_313	ESALQ_270	99.78	899	2	0	1	899	1	899	0	1858
MANIB_316	ESALQ_267	98.67	452	6	0	1	452	1	452	0	918
MANIB_317	ESALQ_266	87.19	320	41	0	1	320	1	320	0	558
MANIB_318	ESALQ_265	99.72	705	2	0	1	705	1	705	0	1462
MANIB_319	ESALQ_264	97.76	268	6	0	1	268	1	268	0	540
MANIB_320	ESALQ_263	99.96	2433	1	0	1	2433	1	2433	0	5035
MANIB_321	ESALQ_262	85.93	405	5	1	1	353	1	405	0	681
MANIB_322	ESALQ_261	99.82	561	1	0	1	561	1	561	0	1154
MANIB_323	ESALQ_260	99.74	381	1	0	1	381	1	381	0	668
MANIB_324	ESALQ_259	99.03	826	8	0	1	826	1	826	0	1667
MANIB_325	ESALQ_258	98.70	384	5	0	1	384	1	384	0	786
MANIB_326	ESALQ_257	98.68	757	10	0	1	757	1	757	0	1563
MANIB_327	ESALQ_256	96.44	505	18	0	1	505	1	505	0	1000
MANIB_328	ESALQ_255	95.99	1047	25	1	16	1045	12	1058	0	2068
MANIB_329	ESALQ_254	99.25	401	3	0	1	401	1	401	0	822
MANIB_330	ESALQ_253	99.82	559	0	1	1	558	1	559	0	1132
MANIB_332	ESALQ_251	98.28	1044	18	0	1	1044	1	1044	0	2115
MANIB_334	ESALQ_249	99.71	342	1	0	1	342	1	342	0	712
MANIB_335	ESALQ_248	95.92	588	1	1	1	565	1	588	0	1144
MANIB_336	ESALQ_247	98.88	357	4	0	1	357	1	357	0	737
MANIB_337	ESALQ_246	96.56	668	23	0	1	668	1	668	0	1347
MANIB_338	ESALQ_245	98.67	376	5	0	1	376	1	376	0	761
MANIB_340	ESALQ_243	99.27	411	3	0	1	411	1	411	0	836
MANIB_341	ESALQ_242	99.25	398	3	0	1	398	1	398	0	810
MANIB_342	ESALQ_241	97.54	448	11	0	1	448	1	448	0	917
MANIB_343	ESALQ_240	85.22	345	10	1	1	345	1	304	0	597
MANIB_344	ESALQ_239	99.43	530	3	0	1	530	1	530	0	1075
MANIB_345	ESALQ_238	95.36	280	13	0	1	280	1	280	0	544
MANIB_346	ESALQ_237	99.12	457	2	1	1	455	1	457	0	880
MANIB_347	ESALQ_236	99.43	529	3	0	1	529	1	529	0	1055
MANIB_348	ESALQ_235	99.18	486	4	0	1	486	1	486	0	927
MANIB_350	ESALQ_233	98.39	996	16	0	1	996	1	996	0	2003
MANIB_351	ESALQ_231	99.51	409	2	0	1	409	1	409	0	830
MANIB_352	ESALQ_230	98.64	294	4	0	90	383	1	294	0	595
MANIB_353	ESALQ_229	91.96	1020	36	2	1	1016	1	978	0	1905
MANIB_354	ESALQ_228	98.82	340	4	0	1	340	481	820	0	702
MANIB_355	ESALQ_228	98.08	469	9	0	1	469	1	469	0	934
MANIB_357	ESALQ_226	98.71	387	5	0	1	387	1	387	0	783
MANIB_359	ESALQ_224	98.07	779	15	0	1	779	1	779	0	1599
MANIB_362	ESALQ_221	99.80	503	1	0	1	503	1	503	0	1050
MANIB_363	ESALQ_219	98.64	662	9	0	357	1018	1	662	0	1323
MANIB_364	ESALQ_218	99.50	597	3	0	1	597	1	597	0	1194
MANIB_366	ESALQ_217	99.68	316	1	0	1	316	1	316	0	649
MANIB_369	ESALQ_215	99.18	612	5	0	1	612	1	612	0	1246
MANIB_370	ESALQ_214	97.38	458	10	1	1	458	1	456	0	904
MANIB_372	ESALQ_212	97.72	394	9	0	1	394	1	394	0	782
MANIB_373	ESALQ_211	95.64	551	17	2	1	551	1	544	0	1068
MANIB_375	ESALQ_209	99.09	329	3	0	1	329	1	329	0	669
MANIB_376	ESALQ_208	98.85	1127	13	0	1	1127	1	1127	0	2318
MANIB_377	ESALQ_207	98.65	296	4	0	1	296	1	296	0	605
MANIB_380	ESALQ_205	95.31	852	37	2	1	849	1	852	0	1655
MANIB_381	ESALQ_204	99.19	867	7	0	1	867	1	867	0	1799
MANIB_382	ESALQ_203	100.00	334	0	0	1	334	1	334	0	686
MANIB_384	ESALQ_201	97.38	1182	31	0	1	1182	1	1182	0	2380
MANIB_385	ESALQ_200	99.01	906	9	0	1	906	1	906	0	1830
MANIB_386	ESALQ_199	98.79	661	8	0	1	661	1	661	0	1341
MANIB_387	ESALQ_198	98.29	703	12	0	1	703	1	703	0	1432
MANIB_389	ESALQ_196	99.21	635	5	0	1	635	1	635	0	1297
MANIB_391	ESALQ_195	99.50	992	5	0	1	992	1	992	0	1997
MANIB_393	ESALQ_192	91.33	369	9	1	1	346	1	369	0	607
MANIB_395	ESALQ_190	98.82	1190	7	1	1	1190	1	1183	0	2385
MANIB_396	ESALQ_189	97.04	506	15	0	1	506	1	506	0	1015
MANIB_398	ESALQ_187	97.79	994	18	1	1	994	1	990	0	2003
MANIB_401	ESALQ_185	95.27	317	11	1	1	317	1	313	0	620
MANIB_402	ESALQ_183	99.34	452	3	0	1	452	1	452	0	909
MANIB_404	ESALQ_181	99.48	578	3	0	1	578	1	578	0	1177
MANIB_405	ESALQ_180	99.70	671	2	0	1	671	1	671	0	1338
MANIB_406	ESALQ_179	99.56	684	3	0	1	684	1	684	0	1409
MANIB_407	ESALQ_177	99.68	316	1	0	1	316	1	316	0	660
MANIB_408	ESALQ_176	94.63	298	11	1	1	293	1	298	0	513
MANIB_409	ESALQ_175	96.79	530	11	1	1	530	1	524	0	1045
MANIB_413	ESALQ_171	99.72	1074	3	0	1	1074	1	1074	0	2164
MANIB_414	ESALQ_170	98.44	1154	17	1	1	1154	1	1153	0	2310
MANIB_415	ESALQ_169	99.32	589	4	0	143	731	1	589	0	1199
MANIB_416	ESALQ_168	92.64	462	4	1	1	432	1	462	0	806
MANIB_418	ESALQ_166	100.00	1067	0	0	1	1067	1	1067	0	2212
MANIB_419	ESALQ_165	97.18	959	13	2	1	945	1	959	0	1815
MANIB_422	ESALQ_162	99.24	523	4	0	1	523	1	523	0	1061
MANIB_423	ESALQ_3463	97.06	374	11	0	1	374	1	374	0	732
MANIB_425	ESALQ_3461	99.79	473	1	0	50	522	45	517	0	941
MANIB_426	ESALQ_3460	99.42	521	1	1	166	686	66	584	0	1050
MANIB_428	ESALQ_3457	83.69	472	23	3	1	472	1	418	0	779
MANIB_429	ESALQ_3456	99.64	1383	5	0	1	1383	1	1383	0	2836
MANIB_431	ESALQ_3455	99.32	296	2	0	1	296	15	310	0	613
MANIB_434	ESALQ_3452	99.61	515	2	0	1	515	1	515	0	1055
MANIB_435	ESALQ_3451	98.37	612	10	0	1	612	1	612	0	1256
MANIB_436	ESALQ_3450	99.28	419	3	0	1	419	1	419	0	850
MANIB_437	ESALQ_3449	99.25	265	2	0	1	265	1	265	0	537
MANIB_439	ESALQ_3447	99.71	344	1	0	1	344	1	344	0	719
MANIB_440	ESALQ_3446	99.18	364	3	0	1	364	1	364	0	733
MANIB_441	ESALQ_3445	96.33	300	10	1	1	300	1	299	0	561
MANIB_445	ESALQ_3441	99.03	617	6	0	1	617	1	617	0	1263
MANIB_446	ESALQ_3440	99.47	562	3	0	2	563	94	655	0	1158
MANIB_447	ESALQ_3439	99.23	912	7	0	1	912	1	912	0	1848
MANIB_448	ESALQ_3438	99.28	278	2	0	19	296	1	278	0	565
MANIB_449	ESALQ_3437	99.83	1185	2	0	1	1185	1	1185	0	2469
MANIB_450	ESALQ_3436	99.41	1347	8	0	1	1347	1	1347	0	2758
MANIB_452	ESALQ_3434	99.78	459	1	0	1	459	1	459	0	958
MANIB_455	ESALQ_3431	100.00	785	0	0	1	785	1	785	0	1627
MANIB_456	ESALQ_3430	93.19	499	13	2	1	499	1	478	0	950
MANIB_457	ESALQ_3429	99.73	367	1	0	132	498	1	367	0	738
MANIB_458	ESALQ_3428	99.64	1096	4	0	1	1096	1	1096	0	2258
MANIB_459	ESALQ_3427	99.46	1298	7	0	1	1298	1	1298	0	2649
MANIB_460	ESALQ_3426	97.81	638	14	0	1	638	1	638	0	1277
MANIB_461	ESALQ_3425	99.95	1939	1	0	1	1939	1	1939	0	4024
MANIB_462	ESALQ_3424	95.83	503	16	1	1	503	1	498	0	993
MANIB_463	ESALQ_3423	86.92	558	40	6	1	549	1	534	0	958
MANIB_464	ESALQ_3422	99.74	382	1	0	1	382	1	382	0	775
MANIB_465	ESALQ_3421	100.00	375	0	0	1	375	1	375	0	782
MANIB_466	ESALQ_3420	99.20	251	2	0	1	251	1	251	0	524
MANIB_467	ESALQ_3419	96.74	797	3	1	1	774	1	797	0	1585
MANIB_468	ESALQ_3418	97.76	447	10	0	1	447	1	447	0	899
MANIB_469	ESALQ_3417	98.25	285	5	0	1	285	1	285	0	578
MANIB_470	ESALQ_3416	98.70	308	4	0	1	308	1	308	0	625
MANIB_471	ESALQ_3415	99.10	889	7	1	1	889	1	888	0	1765
MANIB_472	ESALQ_3414	98.91	368	4	0	1	368	1	368	0	763
MANIB_474	ESALQ_3413	96.98	596	17	1	1	596	23	617	0	1182
MANIB_475	ESALQ_3412	99.77	430	1	0	1	430	1	430	0	870
MANIB_478	ESALQ_3409	97.79	544	12	0	1	544	1	544	0	1107
MANIB_479	ESALQ_3408	99.61	255	1	0	1	255	1	255	0	527
MANIB_480	ESALQ_3407	98.79	496	6	0	1	496	1	496	0	1016
MANIB_481	ESALQ_3406	100.00	282	0	0	1	282	1	282	0	586
MANIB_482	ESALQ_3405	98.82	595	7	0	1	595	1	595	0	1232
MANIB_483	ESALQ_3404	97.43	545	14	0	1	545	1	545	0	1070
MANIB_485	ESALQ_3402	99.51	809	4	0	1	809	1	809	0	1639
MANIB_486	ESALQ_3401	97.92	672	14	0	1	672	1	672	0	1342
MANIB_487	ESALQ_3400	97.58	909	14	2	1	901	1	909	0	1845
MANIB_488	ESALQ_3399	99.63	272	1	0	1	272	1	272	0	563
MANIB_489	ESALQ_3398	99.62	520	1	1	1	519	1	520	0	1069
MANIB_490	ESALQ_3397	99.06	319	3	0	1	319	1	319	0	643
MANIB_491	ESALQ_3396	99.47	757	4	0	1	757	1	757	0	1543
MANIB_492	ESALQ_3395	99.77	444	1	0	1	444	1	444	0	921
MANIB_493	ESALQ_3394	99.80	499	1	0	1	499	1	499	0	1019
MANIB_494	ESALQ_3393	98.35	846	14	0	1	846	1	846	0	1719
MANIB_496	ESALQ_3391	99.77	430	1	0	1	430	1	430	0	867
MANIB_497	ESALQ_3390	99.61	255	1	0	1	255	1	255	0	525
MANIB_498	ESALQ_3389	99.30	1141	8	0	1	1141	1	1141	0	2305
MANIB_499	ESALQ_3388	94.47	615	34	0	1	615	1	615	0	1201
MANIB_501	ESALQ_3387	94.35	814	9	1	1	814	1	777	0	1583
MANIB_504	ESALQ_3384	99.27	275	2	0	1	275	1	275	0	560
MANIB_505	ESALQ_3383	100.00	339	0	0	1	339	1	339	0	708
MANIB_506	ESALQ_3382	99.89	945	1	0	1	945	1	945	0	1949
MANIB_508	ESALQ_3380	100.00	452	0	0	1	452	1	452	0	948
MANIB_509	ESALQ_3379	99.48	769	4	0	354	1122	473	1241	0	1592
MANIB_510	ESALQ_3378	97.50	320	8	0	1	320	1	320	0	659
MANIB_512	ESALQ_3376	99.21	631	5	0	1	631	1	631	0	1306
MANIB_513	ESALQ_3375	96.06	533	5	1	1	517	1	533	0	1045
MANIB_514	ESALQ_3374	91.39	894	39	3	1	869	1	881	0	1628
MANIB_516	ESALQ_3372	99.87	742	1	0	1	742	1	742	0	1546
MANIB_517	ESALQ_3371	99.72	351	1	0	1	351	1	351	0	707
MANIB_518	ESALQ_3370	99.43	522	3	0	1	522	1	522	0	1071
MANIB_520	ESALQ_3368	93.28	521	25	1	1	511	1	521	0	696
MANIB_521	ESALQ_3367	98.71	619	8	0	1	619	1	619	0	1262
MANIB_523	ESALQ_3365	99.77	442	1	0	1	442	1	442	0	899
MANIB_524	ESALQ_3364	98.29	1286	22	0	1	1286	1	1286	0	2486
MANIB_525	ESALQ_3363	99.65	564	2	0	1	564	1	564	0	1161
MANIB_528	ESALQ_3360	99.44	1258	7	0	1	1258	1	1258	0	2588
MANIB_529	ESALQ_3359	96.05	1115	44	0	1	1115	1	1115	0	2175
MANIB_530	ESALQ_3358	100.00	519	0	0	1	519	1	519	0	1062
MANIB_531	ESALQ_3357	90.00	680	17	2	1	651	1	658	0	1231
MANIB_533	ESALQ_3355	98.79	412	5	0	1	412	150	561	0	798
MANIB_534	ESALQ_3354	100.00	351	0	0	1	351	1	351	0	724
MANIB_535	ESALQ_3353	98.83	341	4	0	1	341	1	341	0	692
MANIB_536	ESALQ_3352	98.51	873	13	0	1	873	171	1043	0	1763
MANIB_537	ESALQ_3351	92.79	430	30	1	1	429	1	430	0	703
MANIB_538	ESALQ_3350	99.69	648	2	0	1	648	1	648	0	1332
MANIB_539	ESALQ_3349	99.83	597	1	0	1	597	1	597	0	1200
MANIB_540	ESALQ_3348	99.06	426	4	0	1	426	1	426	0	860
MANIB_541	ESALQ_3347	100.00	684	0	0	1	684	1	684	0	1367
MANIB_542	ESALQ_3346	92.00	625	4	2	1	588	1	616	0	1119
MANIB_543	ESALQ_3345	99.29	845	6	0	1	845	1	845	0	1745
MANIB_544	ESALQ_3344	98.45	386	6	0	1	386	1	386	0	782
MANIB_546	ESALQ_3342	97.97	345	7	0	142	486	1	345	0	701
MANIB_547	ESALQ_3341	99.29	563	4	0	1	563	1	563	0	1155
MANIB_552	ESALQ_3336	98.28	348	6	0	1	348	1	348	0	713
MANIB_553	ESALQ_3335	96.53	259	9	0	1	259	1	259	0	521
MANIB_555	ESALQ_3333	96.91	582	18	0	1	582	1	582	0	1170
MANIB_556	ESALQ_3332	99.16	712	6	0	1	712	1	712	0	1451
MANIB_557	ESALQ_3331	90.88	537	2	1	1	537	1	490	0	996
MANIB_558	ESALQ_3330	98.44	514	7	1	1	513	1	514	0	1039
MANIB_559	ESALQ_3329	97.54	406	10	0	1	406	1	406	0	811
MANIB_561	ESALQ_3327	99.53	847	4	0	1	847	1	847	0	1751
MANIB_562	ESALQ_3326	99.56	452	2	0	1	452	1	452	0	910
MANIB_563	ESALQ_3325	98.92	647	7	0	1	647	1	647	0	1319
MANIB_565	ESALQ_3323	99.26	673	5	0	1	673	1	673	0	1363
MANIB_566	ESALQ_3322	97.66	384	9	0	1	384	1	384	0	761
MANIB_567	ESALQ_3322	93.87	473	12	1	1	456	513	985	0	891
MANIB_568	ESALQ_3320	99.15	820	7	0	1	820	1	820	0	1703
MANIB_571	ESALQ_3318	99.66	583	2	0	1	583	1	583	0	1195
MANIB_572	ESALQ_3317	94.88	586	30	0	1	586	1	586	0	1061
MANIB_573	ESALQ_3316	98.35	484	8	0	1	484	1	484	0	984
MANIB_574	ESALQ_3315	96.25	666	25	0	1	666	1	666	0	1276
MANIB_575	ESALQ_3314	99.09	772	7	0	1	772	71	842	0	1598
MANIB_576	ESALQ_3313	94.88	1757	55	1	1	1722	1	1757	0	3418
MANIB_577	ESALQ_3312	98.51	403	6	0	1	403	1	403	0	811
MANIB_579	ESALQ_3310	98.83	858	10	0	1	858	1	858	0	1737
MANIB_580	ESALQ_3309	100.00	749	0	0	1	749	1	749	0	1538
MANIB_582	ESALQ_3307	97.59	373	8	1	1	372	1	373	0	745
MANIB_583	ESALQ_3306	100.00	275	0	0	235	509	1	275	0	546
MANIB_584	ESALQ_3304	98.80	1422	17	0	1	1422	1	1422	0	2912
MANIB_585	ESALQ_3303	87.32	678	11	3	1	603	1	678	0	1179
MANIB_586	ESALQ_3302	99.48	770	4	0	1	770	1	770	0	1609
MANIB_587	ESALQ_3301	99.54	1724	8	0	1	1724	1	1724	0	3513
MANIB_588	ESALQ_3300	99.18	976	8	0	4	979	26	1001	0	2011
MANIB_589	ESALQ_3299	100.00	278	0	0	1	278	1	278	0	560
MANIB_590	ESALQ_3298	98.78	737	9	0	1	737	1	737	0	1494
MANIB_592	ESALQ_3296	97.44	273	7	0	1	273	1	273	0	561
MANIB_593	ESALQ_3295	98.96	769	8	0	1	769	1	769	0	1578
MANIB_594	ESALQ_3294	99.01	604	6	0	1	604	1	604	0	1241
MANIB_595	ESALQ_3293	99.57	464	2	0	1	464	1	464	0	960
MANIB_596	ESALQ_3292	92.29	973	49	2	1	949	1	971	0	1398
MANIB_597	ESALQ_3291	94.82	1235	18	2	65	1299	6	1194	0	2400
MANIB_599	ESALQ_3289	97.66	1153	27	0	1	1153	1	1153	0	2272
MANIB_600	ESALQ_3288	99.79	481	1	0	1	481	1	481	0	999
MANIB_601	ESALQ_3287	98.28	582	10	0	1	582	1	582	0	1178
MANIB_602	ESALQ_3286	99.76	850	2	0	1	850	1	850	0	1666
MANIB_604	ESALQ_3284	100.00	412	0	0	1	412	1	412	0	863
MANIB_605	ESALQ_3283	90.74	497	4	2	1	497	1	455	0	903
MANIB_608	ESALQ_3280	94.85	427	21	1	1	426	1	427	0	664
MANIB_609	ESALQ_3279	97.26	694	17	1	1	692	1	694	0	1389
MANIB_610	ESALQ_3278	96.60	676	9	3	1	664	1	674	0	1352
MANIB_611	ESALQ_3277	98.96	483	5	0	8	490	1	483	0	979
MANIB_612	ESALQ_3276	99.27	689	5	0	1	689	1	689	0	1424
MANIB_613	ESALQ_3275	98.67	1279	17	0	1	1279	1	1279	0	2591
MANIB_616	ESALQ_3274	99.43	525	3	0	1	525	19	543	0	1061
MANIB_617	ESALQ_3273	99.57	926	4	0	1	926	1	926	0	1924
MANIB_619	ESALQ_3271	99.50	994	5	0	1	994	1	994	0	2072
MANIB_620	ESALQ_3270	99.09	985	9	0	1	985	1	985	0	1994
MANIB_622	ESALQ_3267	99.51	1424	7	0	1	1424	1	1424	0	2914
MANIB_623	ESALQ_3266	94.47	814	33	2	1	802	1	814	0	1526
MANIB_624	ESALQ_3265	97.75	755	13	1	1	755	1	751	0	1512
MANIB_626	ESALQ_3263	99.66	294	1	0	1	294	1	294	0	590
MANIB_627	ESALQ_3262	100.00	465	0	0	1	465	1	465	0	961
MANIB_628	ESALQ_3261	98.88	979	11	0	1	979	1	979	0	2000
MANIB_629	ESALQ_3260	99.52	420	2	0	1	420	1	420	0	865
MANIB_630	ESALQ_3259	98.70	691	9	0	1	691	1	691	0	1411
MANIB_631	ESALQ_3258	98.26	516	9	0	1	516	1	516	0	1055
MANIB_632	ESALQ_3257	99.63	267	1	0	1	267	1	267	0	551
MANIB_634	ESALQ_3255	98.37	367	6	0	1	367	1	367	0	741
MANIB_635	ESALQ_3254	96.37	551	16	1	1	551	1	547	0	1103
MANIB_636	ESALQ_3253	99.14	581	5	0	1	581	1	581	0	1200
MANIB_637	ESALQ_3252	99.23	261	2	0	1	261	1	261	0	526
MANIB_638	ESALQ_3250	98.69	306	4	0	1	306	1	306	0	600
MANIB_639	ESALQ_3249	98.98	392	4	0	1	392	1	392	0	818
MANIB_640	ESALQ_3248	99.68	311	1	0	1	311	1	311	0	642
MANIB_641	ESALQ_3247	98.31	354	6	0	156	509	1	354	0	721
MANIB_643	ESALQ_3245	97.66	1713	30	2	1	1711	1	1705	0	3241
MANIB_644	ESALQ_3244	89.84	374	9	2	1	374	1	345	0	672
MANIB_646	ESALQ_3242	96.65	656	22	0	1	656	1	656	0	1323
MANIB_647	ESALQ_3241	94.71	1002	16	1	1	1002	1	965	0	1930
MANIB_648	ESALQ_3240	99.30	1283	8	1	1	1283	1	1282	0	2654
MANIB_649	ESALQ_3239	93.04	316	22	0	1	316	1	316	0	583
MANIB_650	ESALQ_3238	98.57	489	6	1	1	489	1	488	0	986
MANIB_652	ESALQ_3236	91.72	652	29	1	1	627	4	655	0	1224
MANIB_653	ESALQ_3235	98.99	298	3	0	1	298	1	298	0	616
MANIB_654	ESALQ_3233	98.89	270	3	0	1	270	1	270	0	536
MANIB_655	ESALQ_3232	96.53	518	10	2	1	518	1	510	0	1040
MANIB_656	ESALQ_3231	96.78	622	17	1	3	621	1	622	0	1244
MANIB_657	ESALQ_3230	97.05	610	18	0	1	610	1	610	0	1226
MANIB_659	ESALQ_3228	98.47	1304	20	0	1	1304	1	1304	0	2590
MANIB_660	ESALQ_3227	99.08	1957	18	0	1	1957	1	1957	0	3997
MANIB_661	ESALQ_3226	99.77	439	1	0	1	439	1	439	0	916
MANIB_663	ESALQ_3225	99.26	537	4	0	586	1122	591	1127	0	1093
MANIB_664	ESALQ_3224	76.52	558	80	9	5	552	2	518	0	725
MANIB_665	ESALQ_3223	97.82	367	8	0	2	368	16	382	0	753
MANIB_666	ESALQ_3222	97.33	972	11	1	1	957	1	972	0	1941
MANIB_667	ESALQ_3221	95.49	554	1	1	1	554	1	530	0	1089
MANIB_668	ESALQ_3220	96.88	577	7	2	1	577	1	566	0	1092
MANIB_670	ESALQ_3218	98.47	655	9	1	1	654	1	655	0	1280
MANIB_671	ESALQ_3217	97.36	909	19	1	1	909	1	904	0	1823
MANIB_672	ESALQ_3216	98.71	621	8	0	1	621	1	621	0	1280
MANIB_673	ESALQ_3215	99.63	2167	8	0	1	2167	1	2167	0	4517
MANIB_675	ESALQ_3213	98.94	284	3	0	1	284	1	284	0	569
MANIB_676	ESALQ_3212	97.65	340	8	0	1	340	1	340	0	684
MANIB_677	ESALQ_3211	91.69	421	6	1	1	392	1	421	0	764
MANIB_678	ESALQ_3210	99.48	581	3	0	1	581	1	581	0	1195
MANIB_680	ESALQ_3207	99.65	579	2	0	1	579	1	579	0	1192
MANIB_681	ESALQ_3206	99.30	1003	7	0	1	1003	1	1003	0	2028
MANIB_682	ESALQ_3205	98.06	566	11	0	1	566	1	566	0	1148
MANIB_683	ESALQ_3204	99.40	833	5	0	1	833	1	833	0	1615
MANIB_684	ESALQ_3203	99.81	517	1	0	1	517	1	517	0	1072
MANIB_685	ESALQ_3202	97.47	830	21	0	1	830	1	830	0	1649
MANIB_687	ESALQ_3200	94.92	866	14	1	270	1135	9	844	0	1637
MANIB_688	ESALQ_3198	95.73	1474	27	4	1	1440	1	1472	0	2802
MANIB_689	ESALQ_3197	94.20	414	21	1	1	414	1	411	0	744
[truncated: 10,423 more rows]

## Sheet: ESALQ_MANIB_pairs
Query_ESALQ_strain1638	Target_M.anisopliae_BRIP53293
[truncated: 9,747 more rows]

[truncated: 24 more sheets: BLASTp_ESALQ_MANIA, BLASTp_MANIA_ESALQ, ESALQ_MANIA_pairs, BLASTp_ESALQ_MANIE, BLASTp_MANIE_ESALQ, ESALQ_MANIE_pairs, BLASTp_ESALQ_MBRU, BLASTp_MBRU_ESALQ, ESALQ_MBRU_pairs, BLASTp_ESALQ_MGUI, BLASTp_MGUI_ESALQ, ESALQ_MGUI_pairs, BLASTp_ESALQ_MMAJ, BLASTp_MMAJ_ESALQ, ESALQ_MMAJ_pairs, BLASTp_ESALQ_MACR, BLASTp_MACR_ESALQ, ESALQ_MACR_pairs, BLASTp_ESALQ_MALB, BLASTp_MALB_ESALQ …]
